# Supplementary material for: Regio- and diastereoselective construction of conjugate oxindole derivatives enabled by delayed acyl transfer of pyridinium ylides
Source: Royal Society of Chemistry journal article supplement (doi:10.1039/d3qo00412k), 2023-01-01

## Supporting Information

### Regio- and Diastereoselective Construction of Conjugate Oxindole Derivatives Enabled by Delayed Acyl Transfer of Pyridinium Ylides

Mengchu Zhang, Gengxin Liu, Tianyuan Zhang, Kemiao Hong, Xiangji Yang, Huang Qiu and  
Wenhao Hu\*

School of Pharmaceutical Sciences, Sun Yat-sen University, Guangzhou 510006, China

E-mail: [huwh9@mail.sysu.edu.cn](mailto:huwh9@mail.sysu.edu.cn)

### Contents

|                                                                                                                 |    |
|-----------------------------------------------------------------------------------------------------------------|----|
| 1. General information .....                                                                                    | 2  |
| 2. Experimental procedures .....                                                                                | 2  |
| 2.1 General procedure for synthesis of cyclopropenes .....                                                      | 2  |
| 2.2 General procedure for synthesis of 2-oxypyridines .....                                                     | 6  |
| 2.3 General procedure for synthesis of substituted isatins .....                                                | 8  |
| 2.4 General procedure for the three-component reaction .....                                                    | 8  |
| 2.5 General procedure for scale up .....                                                                        | 9  |
| 3. Product derivatizations .....                                                                                | 9  |
| 4. Explanation for the abnormal split of methylene at CH <sub>2</sub> -O-CH <sub>3</sub> in most examples ..... | 11 |
| 5. General Procedure for the <i>in vitro</i> Anti-tumor Activity Study .....                                    | 13 |
| 6. References .....                                                                                             | 14 |
| 7. Single crystal X-ray diffraction data .....                                                                  | 15 |
| 8. Analytical data of products .....                                                                            | 19 |
| 9. NMR spectra of new starting materials products .....                                                         | 47 |
| 10. NMR spectra of products .....                                                                               | 65 |

## 1. General information

**General:** All  $^1\text{H}$  NMR (400 MHz, 500 MHz) and  $^{13}\text{C}$  NMR (100 MHz or 125 MHz) and  $^{19}\text{F}$  NMR (376 MHz, 471 MHz) spectra were recorded on 400 MHz or 500 MHz Bruker spectrometers in  $\text{CDCl}_3$ ; chemical shifts were reported in ppm with the solvent signal as reference, and coupling constants ( $J$ ) were given in Hertz. The peak information was described as: s = singlet, d = doublet, t = triplet, q = quartet, m = multiplet, br = broad. High-resolution mass spectrometry (HRMS) data were collected on Waters Micromass Q-TOF micro Synapt High Definition Mass Spectrometer. Low-resolution mass spectrometry (LRMS) data were collected on Waters SQD2 with Waters H-Class UPLC. Single crystal X-ray diffraction data (**4aa**, **4ar**, **6a**, **8**) were recorded on Bruker-AXS SMART APEX II single crystal X-ray diffractometer. Yields for all compounds were isolated yields for all isomers.

## 2. Experimental procedures

### 2.1 General procedure for synthesis of cyclopropenes

Cyclopropenes **1a**, **1n-u** were known products and prepared according to the literature procedures<sup>[1]</sup>.

Cyclopropenes **1b-m** were new products and prepared using the follow procedures.

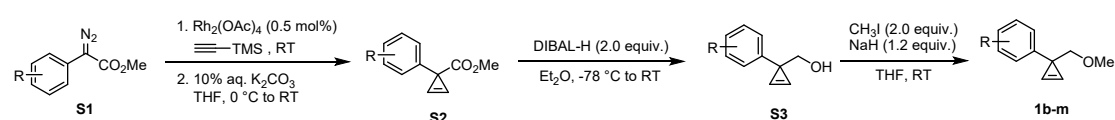

To a suspension of  $\text{Rh}_2(\text{OAc})_4$  (0.5 mol%) in TMS-acetylene (30 mL) stirred at room temperature, a solution of diazoacetate **S1** (10 mmol) in TMS-acetylene (10 mL) was added *via* syringe pump over 16 hrs. After the addition was complete, the mixture was stirred for additional 2 hrs, when TLC analysis showed completion of the reaction. Then, the most of TMS-acetylene was distilled off and the suspension was concentrated under reduced pressure. The residue was filtered through a short column of Silica gel, (eluent – EtOAc) and the eluate was concentrated and dissolved in THF (50 mL). To the obtained solution 10% aqueous  $\text{K}_2\text{CO}_3$  (20 mL) was added dropwise at 0°C. The mixture was warmed to room temperature and stirred overnight, when TLC analysis showed completion of the reaction. Two layers were separated; an organic layer was concentrated and combined back with aqueous phase. Ice-cold water was added, and the mixture was extracted with EtOAc. Combined organic phases were washed (brine), dried ( $\text{Na}_2\text{SO}_4$ ), filtered, and concentrated in vacuum. The residue was purified by preparative column chromatography on silica gel, eluent Petroleum ether-EtOAc 10:1 to obtain ester **S2**.

To a stirred solution of ester **S2** (10 mmol) in dry ether (20 mL), DIBAL-H (1.5 M solution in hexanes, 13.5 mL, 2.0 equiv.) was added dropwise at -78°C. The mixture was stirred for 1 hr at -78°C, then warmed to room temperature and stirred for additional 1 hr, and then quenched with saturated NH<sub>4</sub>Cl. Formed gel was dissolved in 2 N aqueous HCl, and extracted with EtOAc. Combined organic layers were washed with NaHCO<sub>3</sub> and brine, dried Na<sub>2</sub>SO<sub>4</sub>, filtered, and evaporated. The residue was purified by preparative column chromatography on silica gel, eluent Petroleum ether-EtOAc 5:1 to obtain alcohol **S3**.

A solution of the alcohol **S3** in anhydrous THF was added to a stirring suspension of NaH (1.2 equiv.) in THF under argon. The mixture was stirred for 10 minutes or until hydrogen gas evolution had ceased. Iodomethane (2.0 equiv.) was added dropwise and the resulting mixture stirred at RT overnight. The mixture was diluted with EtOAc, washed with water and brine, then dried over Na<sub>2</sub>SO<sub>4</sub>, filtered, and concentrated under reduced pressure. The residue was purified by preparative column chromatography on silica gel, eluent Petroleum ether-EtOAc 20:1 to afford the product **1** in quantitative yield.

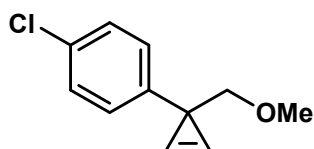

1-chloro-4-(1-(methoxymethyl)cycloprop-2-en-1-yl)benzene (**1b**)

Prepared following aforementioned methods to afford **1b** as pale-yellow oil.

<sup>1</sup>H NMR (400 MHz, CDCl<sub>3</sub>) δ 7.27 (s, 2H), 7.23 (d, *J* = 7.8 Hz, 2H), 7.15 (d, *J* = 7.7 Hz, 2H), 3.79 (s, 2H), 3.37 (s, 3H).

<sup>13</sup>C NMR (100 MHz, CDCl<sub>3</sub>) δ 145.2, 131.4, 128.2, 127.8, 112.82, 112.78, 80.0, 58.6, 26.4.

ChemDraw: calcd for C<sub>11</sub>H<sub>11</sub>OCl : 194.05; LRMS found: 195.02 [M+H]<sup>+</sup>.

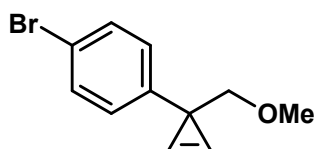

1-bromo-4-(1-(methoxymethyl)cycloprop-2-en-1-yl)benzene (**1c**)

Prepared following aforementioned methods to afford **1c** as pale-yellow oil.

<sup>1</sup>H NMR (400 MHz, CDCl<sub>3</sub>) δ 7.38 (d, *J* = 7.6 Hz, 2H), 7.27 (s, 2H), 7.10 (d, *J* = 7.6 Hz, 2H), 3.79 (s, 2H), 3.37 (s, 3H).

<sup>13</sup>C NMR (100 MHz, CDCl<sub>3</sub>) δ 145.7, 131.1, 128.3, 119.5, 112.8, 112.7, 80.0, 58.6, 26.5.

ChemDraw: calcd for C<sub>11</sub>H<sub>11</sub>OBr : 238.00; LRMS found: 239.01 [M+H]<sup>+</sup>.

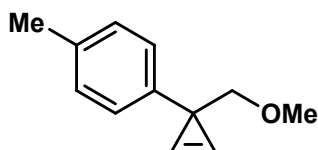

1-(1-(methoxymethyl)cycloprop-2-en-1-yl)-4-methylbenzene (**1d**)

Prepared following aforementioned methods to afford **1d** as pale-yellow oil.

$^1\text{H NMR}$  (400 MHz,  $\text{CDCl}_3$ )  $\delta$  7.29 – 7.24 (m, 2H), 7.13 – 7.06 (m, 4H), 3.81 (s, 2H), 3.36 (s, 3H), 2.30 (s, 3H).

$^{13}\text{C NMR}$  (100 MHz,  $\text{CDCl}_3$ )  $\delta$  143.6, 135.1, 128.8, 126.3, 113.12, 113.08, 80.0, 58.5, 26.5, 21.0.

ChemDraw: calcd for  $\text{C}_{12}\text{H}_{14}\text{O}$  : 174.10; LRMS found: 175.66  $[\text{M}+\text{H}]^+$ .

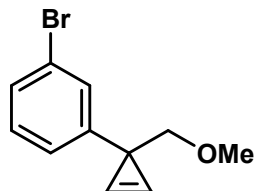

1-bromo-3-(1-(methoxymethyl)cycloprop-2-en-1-yl)benzene (**1e**)

Prepared following aforementioned methods to afford **1e** as pale-yellow oil.

$^1\text{H NMR}$  (400 MHz,  $\text{CDCl}_3$ )  $\delta$  7.35 – 7.32 (m, 1H), 7.30 – 7.27 (m, 2H), 7.21 – 7.08 (m, 3H), 3.78 (s, 2H), 3.37 (s, 3H).

$^{13}\text{C NMR}$  (100 MHz,  $\text{CDCl}_3$ )  $\delta$  149.3, 129.7, 128.8, 125.1, 122.6, 112.60, 112.56, 79.8, 58.6, 26.6.

ChemDraw: calcd for  $\text{C}_{12}\text{H}_{11}\text{OBr}$  : 238.00; LRMS found: 239.12  $[\text{M}+\text{H}]^+$ .

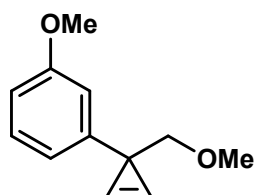

1-methoxy-3-(1-(methoxymethyl)cycloprop-2-en-1-yl)benzene (**1f**)

Prepared following aforementioned methods to afford **1f** as pale-yellow oil.

$^1\text{H NMR}$  (500 MHz,  $\text{CDCl}_3$ )  $\delta$  7.26 (s, 2H), 7.20 (t,  $J = 7.9$  Hz, 1H), 6.83 (d,  $J = 7.7$  Hz, 1H), 6.79 – 6.76 (m, 1H), 6.71 (dd,  $J = 8.1, 2.2$  Hz, 1H), 3.82 (s, 2H), 3.79 (s, 3H), 3.38 (s, 3H).

$^{13}\text{C NMR}$  (125 MHz,  $\text{CDCl}_3$ )  $\delta$  159.6, 148.5, 129.1, 118.9, 112.6, 112.5, 110.9, 79.9, 58.6, 55.3, 26.8.

ChemDraw: calcd for  $\text{C}_{12}\text{H}_{14}\text{O}_2$  : 190.10; LRMS found: 191.14  $[\text{M}+\text{H}]^+$ .

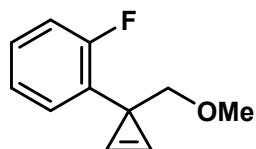

1-fluoro-2-(1-(methoxymethyl)cycloprop-2-en-1-yl)benzene (**1g**)

Prepared following aforementioned methods to afford **1g** as pale-yellow oil.

$^1\text{H NMR}$  (500 MHz,  $\text{CDCl}_3$ )  $\delta$  7.54 (s, 2H), 7.19 – 7.13 (m, 2H), 7.06 – 7.02 (m, 1H), 6.99 – 6.94 (m, 1H), 3.68 (s, 2H), 3.31 (s, 3H).

$^{13}\text{C NMR}$  (125 MHz,  $\text{CDCl}_3$ )  $\delta$  161.8 (d,  $J = 245.3$  Hz), 132.8 (d,  $J = 15.4$  Hz), 130.2 (d,  $J = 5.2$  Hz), 128.0 (d,  $J = 8.2$  Hz), 124.2 (d,  $J = 3.4$  Hz), 116.0 (d,  $J = 1.5$  Hz), 115.7 (d,  $J = 22.5$  Hz), 79.7 (d,  $J = 2.7$  Hz), 58.7, 24.6.

$^{19}\text{F NMR}$  (376 MHz,  $\text{CDCl}_3$ )  $\delta$  -117.66.

ChemDraw: calcd for  $\text{C}_{11}\text{H}_{11}\text{OF}$  : 178.08; LRMS found: 179.79  $[\text{M}+\text{H}]^+$ .



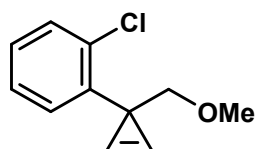

1-chloro-2-(1-(methoxymethyl)cycloprop-2-en-1-yl)benzene (**1h**)

Prepared following aforementioned methods to afford **1h** as pale-yellow oil.

<sup>1</sup>H NMR (400 MHz, CDCl<sub>3</sub>) δ 7.59 (s, 2H), 7.32 – 7.26 (m, 2H), 7.19 – 7.10 (m, 2H), 3.64 (s, 2H), 3.29 (s, 3H).

<sup>13</sup>C NMR (100 MHz, CDCl<sub>3</sub>) δ 143.4, 134.2, 130.8, 129.7, 127.9, 127.1, 116.7, 78.9, 58.8, 28.2.

ChemDraw: calcd for C<sub>11</sub>H<sub>11</sub>OCl : 194.05; LRMS found: 195.90 [M+H]<sup>+</sup>.

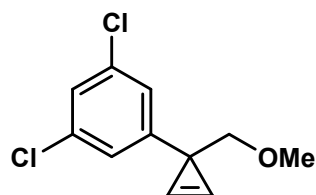

1,3-dichloro-5-(1-(methoxymethyl)cycloprop-2-en-1-yl)benzene (**1i**)

Prepared following aforementioned methods to afford **1i** as pale-yellow oil.

<sup>1</sup>H NMR (400 MHz, CDCl<sub>3</sub>) δ 7.36 – 7.27 (m, 4H), 7.08 – 7.05 (m, 1H), 3.76 (s, 2H), 3.37 (s, 3H).

<sup>13</sup>C NMR (100 MHz, CDCl<sub>3</sub>) δ 147.2, 132.2, 129.9, 129.5, 128.6, 126.0, 112.6, 112.5, 79.9, 58.6, 26.2.

ChemDraw: calcd for C<sub>11</sub>H<sub>10</sub>OCl<sub>2</sub> : 228.01; LRMS found: 229.99 [M+H]<sup>+</sup>.

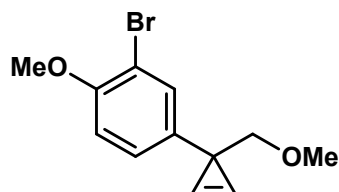

2-bromo-1-methoxy-4-(1-(methoxymethyl)cycloprop-2-en-1-yl)benzene (**1j**)

Prepared following aforementioned methods to afford **1j** as pale-yellow oil.

<sup>1</sup>H NMR (400 MHz, CDCl<sub>3</sub>) δ 7.36 (s, 1H), 7.29 (s, 1H), 7.15 (d, *J* = 8.5 Hz, 1H), 6.82 (d, *J* = 8.4 Hz, 1H), 3.85 (s, 3H), 3.77 (s, 2H), 3.37 (s, 3H).

<sup>13</sup>C NMR (100 MHz, CDCl<sub>3</sub>) δ 154.0, 140.6, 131.5, 126.5, 113.21, 113.17, 111.8, 111.6, 80.0, 58.6, 56.4, 26.0.

ChemDraw: calcd for C<sub>12</sub>H<sub>13</sub>O<sub>2</sub>Br : 268.01; LRMS found: 269.04 [M+H]<sup>+</sup>.

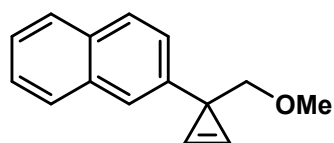

2-(1-(methoxymethyl)cycloprop-2-en-1-yl)naphthalene (**1k**)

Prepared following aforementioned methods to afford **1k** as pale-yellow oil.

<sup>1</sup>H NMR (400 MHz, CDCl<sub>3</sub>) δ 7.78 – 7.75 (m, 2H), 7.74 – 7.65 (m, 2H), 7.45 – 7.38 (m, 2H), 7.37 – 7.33 (m, 3H), 3.93 (s, 2H), 3.41 (s, 3H).

<sup>13</sup>C NMR (100 MHz, CDCl<sub>3</sub>) δ 144.1, 133.5, 132.0, 127.8, 127.6, 126.0, 125.3, 125.02, 124.97, 113.10,

113.07, 80.0, 58.6, 27.0.

ChemDraw: calcd for C<sub>15</sub>H<sub>14</sub>O : 210.10; LRMS found: 211.08 [M+H]<sup>+</sup>.

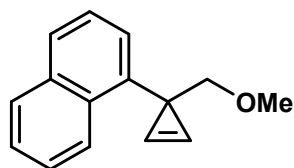

1-(1-(methoxymethyl)cycloprop-2-en-1-yl)naphthalene (**11**)

Prepared following aforementioned methods to afford **11** as pale-yellow oil.

<sup>1</sup>H NMR (400 MHz, CDCl<sub>3</sub>) δ 8.31 (d, *J* = 8.3 Hz, 1H), 7.84 (d, *J* = 8.0 Hz, 1H), 7.74 (s, 2H), 7.72 – 7.68 (m, 1H), 7.53 (t, *J* = 7.4 Hz, 1H), 7.46 (t, *J* = 7.3 Hz, 1H), 7.41 – 7.37 (m, 2H), 3.73 (s, 2H), 3.28 (s, 3H).

<sup>13</sup>C NMR (100 MHz, CDCl<sub>3</sub>) δ 142.9, 134.2, 131.6, 129.0, 127.2, 126.0, 125.9, 125.6, 124.7, 117.0, 79.7, 58.8, 27.5.

ChemDraw: calcd for C<sub>15</sub>H<sub>14</sub>O : 210.10; LRMS found: 211.19 [M+H]<sup>+</sup>.

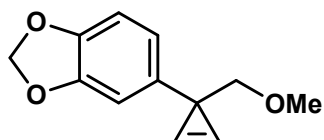

5-(1-(methoxymethyl)cycloprop-2-en-1-yl)benzo[*d*][1,3]dioxole (**1m**)

Prepared following aforementioned methods to afford **1m** as pale-yellow oil.

<sup>1</sup>H NMR (400 MHz, CDCl<sub>3</sub>) δ 7.27 (s, 2H), 6.76 – 6.70 (m, 2H), 6.69 – 6.65 (m, 1H), 5.89 (s, 2H), 3.76 (s, 2H), 3.36 (s, 3H).

<sup>13</sup>C NMR (100 MHz, CDCl<sub>3</sub>) δ 147.6, 145.6, 141.0, 119.4, 113.40, 113.35, 107.9, 107.2, 100.9, 80.3, 58.5, 26.7.

ChemDraw: calcd for C<sub>12</sub>H<sub>12</sub>O<sub>3</sub> : 204.08; LRMS found: 205.02 [M+H]<sup>+</sup>.

## 2.2 General procedure for synthesis of 2-oxypyridines

2-oxypyridines **2a-e**, **2h-j** were known products and prepared according to the literature procedures<sup>[2]</sup>. 2-oxypyridines **2f**, **2g**, **2k**, **2l** were new products and prepared using the follow procedures.

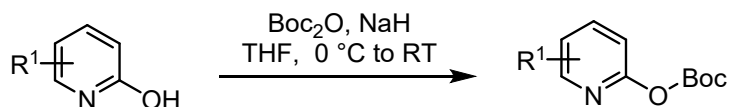

To a suspension of 60% NaH (4.8 mmol) in THF (5 mL) was added dropwise a solution of 2-hydroxypyridine (4 mmol) in THF (5 mL) at 0 °C. The mixture was stirred for 30 min at 0 °C, then

Boc<sub>2</sub>O (4.4 mmol) in THF (2 mL) was added. After addition, the mixture was warmed to RT and stirred for 2-6 h. The reaction was quenched with water and extracted with EtOAc. The organic layer was washed with brine, dried over Na<sub>2</sub>SO<sub>4</sub>, filtered, and concentrated under vacuum to give crude product; the crude was purified by column chromatography (silica gel, eluted with EtOAc: Petroleum ether = 1:50-1:15, note: 3% Et<sub>3</sub>N was added in the eluent) to give 2-BocO-pyridines.

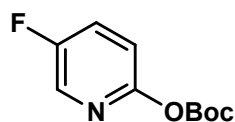

*tert*-butyl (5-fluoropyridin-2-yl) carbonate (**2f**)

The compound was prepared *via* aforementioned method as white solid (752 mg, 88% yield).

<sup>1</sup>H NMR (500 MHz, CDCl<sub>3</sub>) δ 8.23 (d, *J* = 3.0 Hz, 1H), 7.54 – 7.49 (m, 1H), 7.11 (dd, *J* = 8.8, 3.6 Hz, 1H), 1.56 (s, 8H).

<sup>13</sup>C NMR (125 MHz, CDCl<sub>3</sub>) δ 158.0 (d, *J* = 253.4 Hz), 153.6 (d, *J* = 2.1 Hz), 151.0, 135.9 (d, *J* = 26.6 Hz), 126.7 (d, *J* = 20.8 Hz), 116.8 (d, *J* = 5.2 Hz), 84.3, 27.7.

<sup>19</sup>F NMR (376 MHz, CDCl<sub>3</sub>) δ -130.73.

ChemDraw: calcd for C<sub>10</sub>H<sub>12</sub>NO<sub>3</sub>F : 213.08; LRMS found: 214.09 [M+H]<sup>+</sup>.

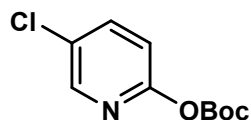

*tert*-butyl (5-chloropyridin-2-yl) carbonate (**2g**)

The compound was prepared *via* aforementioned method as white solid (780 mg, 85% yield).

<sup>1</sup>H NMR (500 MHz, CDCl<sub>3</sub>) δ 8.34 (d, *J* = 2.4 Hz, 1H), 7.75 (dd, *J* = 8.6, 2.6 Hz, 1H), 7.09 (d, *J* = 8.6 Hz, 1H), 1.56 (s, 9H).

<sup>13</sup>C NMR (125 MHz, CDCl<sub>3</sub>) δ 156.2, 150.8, 147.1, 139.4, 129.8, 116.8, 84.6, 27.7.

ChemDraw: calcd for C<sub>10</sub>H<sub>12</sub>NO<sub>3</sub>Cl : 229.05; LRMS found: 230.13 [M+H]<sup>+</sup>.

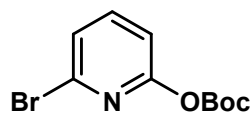

6-bromopyridin-2-yl *tert*-butyl carbonate (**2k**)

The compound was prepared *via* aforementioned method as white solid (983 mg, 90% yield).

<sup>1</sup>H NMR (500 MHz, CDCl<sub>3</sub>) δ 7.65 (t, *J* = 7.8 Hz, 1H), 7.42 (d, *J* = 7.7 Hz, 1H), 7.11 (d, *J* = 8.0 Hz, 1H), 1.55 (s, 9H).

<sup>13</sup>C NMR (125 MHz, CDCl<sub>3</sub>) δ 157.0, 150.5, 141.4, 139.5, 126.4, 114.7, 84.7, 27.7.

ChemDraw: calcd for C<sub>10</sub>H<sub>12</sub>NO<sub>3</sub>Br : 273.00; LRMS found: 274.01 [M+H]<sup>+</sup>.

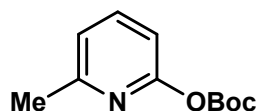

*tert*-butyl (6-methylpyridin-2-yl) carbonate (**2l**)

The compound was prepared *via* aforementioned method as white solid (761 mg, 91% yield).

<sup>1</sup>H NMR (500 MHz, CDCl<sub>3</sub>) δ 7.66 (t, *J* = 7.7 Hz, 1H), 7.07 (d, *J* = 7.5 Hz, 1H), 6.92 (d, *J* = 8.0 Hz, 1H), 2.53 (s, 3H), 1.55 (s, 9H).

<sup>13</sup>C NMR (125 MHz, CDCl<sub>3</sub>) δ 158.1, 157.2, 151.4, 139.8, 121.5, 112.7, 83.9, 27.8, 24.1.

ChemDraw: calcd for C<sub>11</sub>H<sub>15</sub>NO<sub>3</sub> : 209.11; LRMS found: 210.11 [M+H]<sup>+</sup>.

### 2.3 General procedure for synthesis of substituted isatins

All of the substituted isatins **3a-p** were known products and prepared according to the literature procedures<sup>[3]</sup>.

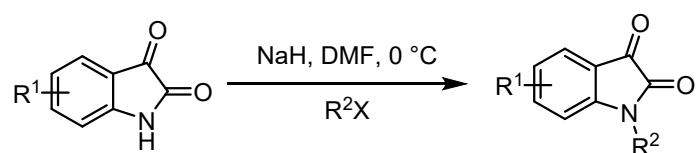

To a solution of substituted indoles (20 mmol, 1.0 equiv.) in DMF (40 mL) was added NaH (30 mmol, 1.5 equiv.) at 0 °C and stirred 10 minutes, R substituted halogenated hydrocarbon (30 mmol, 1.5 equiv.) was dropped slowly and the reaction was stirred at 0 °C until substituted indoles was consumed completely. The reaction was quenched with saturated aqueous NH<sub>4</sub>Cl and extracted with EtOAc three times. The combined organic phase was washed with brine, dried over anhydrous Na<sub>2</sub>SO<sub>4</sub>, filtered, and concentrated. The crude product was purified by flash column chromatography.

### 2.4 General procedure for the three-component reaction

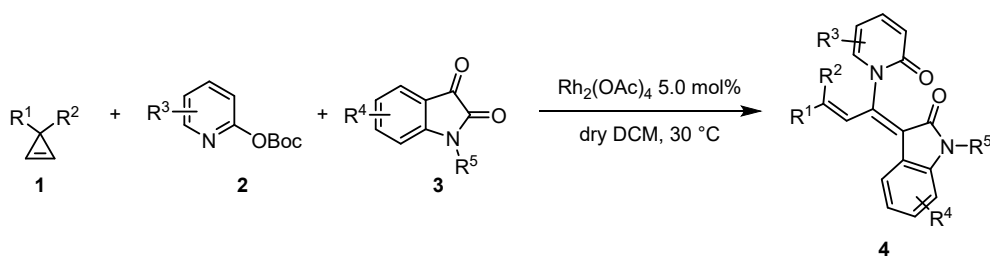

To an oven-dried test tube with a stirring bar were added substituted isatins (0.20 mmol, 1.0 equiv.), 2-BocO-pyridines (0.22 mmol, 1.1 equiv.), cyclopropenes (0.22 mmol, 1.1 equiv.) and Rh<sub>2</sub>(OAc)<sub>4</sub> (4.4 mg, 5.0 mol%), and then the vessel capped by a septum for injection. The anhydrous CH<sub>2</sub>Cl<sub>2</sub> (3.0 mL) was added, and the mixture was stirred at 30 °C and monitored by TLC. Upon completion of the reaction, the mixture was concentrated to give a residue which was subjected to <sup>1</sup>H NMR spectroscopy analysis for the determination of diastereoselectivity (*dr* value). Careful purification the crude product by flash chromatography on silica gel (eluent: petroleum ether/EtOAc = 10/1~3/1) afforded pure products.

## 2.5 General procedure for scale up

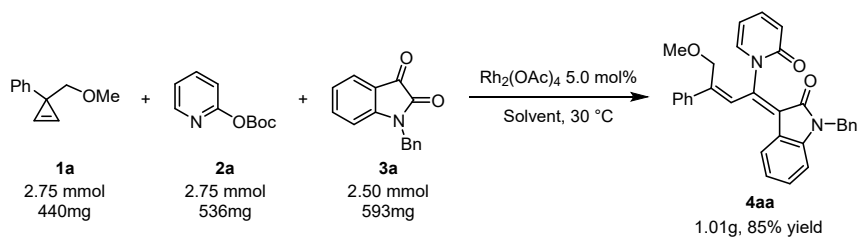

To an oven-dried test tube with a stirring bar were added 1-benzylindoline-2,3-dione **3a** (2.50 mmol, 1.0 equiv.), *tert*-butyl pyridin-2-yl carbonate **2a** (2.75 mmol, 1.1 equiv.), (1-(methoxymethyl)cycloprop-2-en-1-yl)benzene **1a** (2.75 mmol, 1.1 equiv.) and  $\text{Rh}_2(\text{OAc})_4$  (55 mg, 5.0 mol%), and then the vessel capped by a septum for injection. The anhydrous  $\text{CH}_2\text{Cl}_2$  (30.0 mL) was added, and the mixture was stirred at 30 °C and monitored by TLC. Upon completion of the reaction, the mixture was concentrated to give a residue which was subjected to  $^1\text{H}$  NMR spectroscopy analysis for the determination of diastereoselectivity (*dr* value). Careful purification the crude product by flash chromatography on silica gel (eluent: petroleum ether/EtOAc = 10/1~3/1) afforded 1.01g pure product **4aa** in 85% yield.

## 3. Product derivatizations

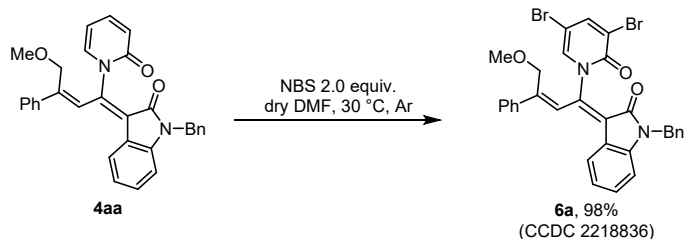

**Synthesis of 6a:** Following a modified procedure reported in the supporting information of Shimada<sup>[4]</sup>. To a 10-mL oven-dried vial with a magnetic stirring bar, **4aa** (47.4 mg, 0.10 mmol), NBS (26.7 mg, 0.20 mmol) and dry DMF (1.5 mL) were added under argon atmosphere. Then the reaction solution was stirred overnight at 30 °C. After the completion of the reaction (monitored by TLC), the reaction mixture was treated with 10%  $\text{Na}_2\text{S}_2\text{O}_3$  aq. (10 mL) and was extracted with AcOEt (3 x 10 mL). The combined organic phase was washed with  $\text{H}_2\text{O}$  (2 x 10 mL) and brine (10 mL) and dried over  $\text{Na}_2\text{SO}_4$ . After removal of solvent under reduced pressure, the residue was chromatographed on silica gel (Petroleum ether/EtOAc = 10:1 to 5:1) to give 61.7 mg of pure product **6a** as red brown solid, 98% yield.

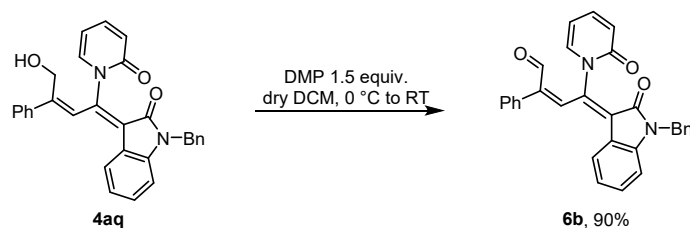

**Synthesis of 6b:** Following a modified procedure from Dess and Martin<sup>[5]</sup>. Dess-Martin reagent (DMP) (63.6 mg, 0.15 mmol) was added portionwise to a solution of the alcohol **4aq** (46.0 mg, 0.1 mmol) in dry DCM (2 mL) at 0 °C. After being stirred at ambient temperature for 20 minutes, the reaction mixture was quenched with saturated NaHCO<sub>3</sub>(aq) (10 mL) and washed with saturated Na<sub>2</sub>S<sub>2</sub>O<sub>3</sub>(aq) (2 x 10 mL). The organic layer was dried over Na<sub>2</sub>SO<sub>4</sub>, filtered, and concentrated in vacuo. The crude product was purified by flash chromatography on silica gel (Petroleum ether/EtOAc = 10:1 to 2:1) to afford the aldehyde **6b** as red brown solid (41.2 mg, 90%).

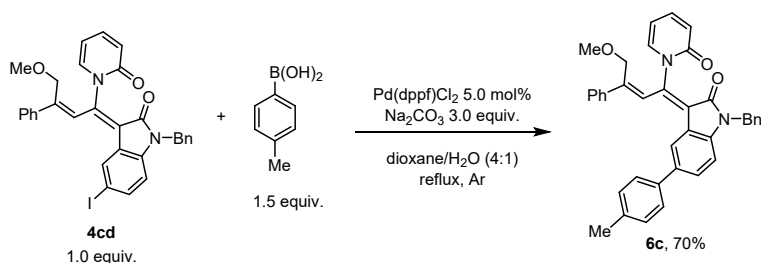

**Synthesis of 6c:** Prepared by a Suzuki coupling following the literature procedure reported in the supporting information of Sun<sup>[2b]</sup>. To a 10-mL oven-dried Schlenk tube with a magnetic stirring bar, **4cd** (60.0 mg, 0.10 mmol), 4-tolylboronic acid (20.4 mg, 0.15 mmol), Pd(dppf)Cl<sub>2</sub> (3.6 mg, 0.005 mol), Na<sub>2</sub>CO<sub>3</sub> (31.8 mg, 0.30 mmol), and a combined solvent (1,4-dioxane/H<sub>2</sub>O = 4:1, 2.5 mL) were added in sequence at room temperature. The reaction mixture was stirred at 80 °C for 10 hrs under argon atmosphere. When the reaction was completed (monitored by TLC), quenched with H<sub>2</sub>O (15 mL) and extracted with ethyl acetate (3 x 10 mL). The combined organic phase was washed successively with water and brine, dried over anhydrous Na<sub>2</sub>SO<sub>4</sub>, and then concentrated under reduced pressure after filtration. The crude product was purified by flash chromatography on silica gel (Petroleum ether/EtOAc = 10:1 to 2:1) to give **6c** as red brown solid (39.5 mg, 70%).

#### 4. Explanation for the abnormal split of methylene at CH<sub>2</sub>-O-CH<sub>3</sub> in most examples

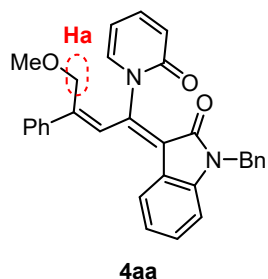

The abnormal split of **Ha** occurred due to the potential axis chirality of the desired products or the different polarity of deuterated solution. Here using **4aa** as an example and show the difference of **Ha** in different deuterated solution.

(1) <sup>1</sup>H NMR made in CDCl<sub>3</sub>

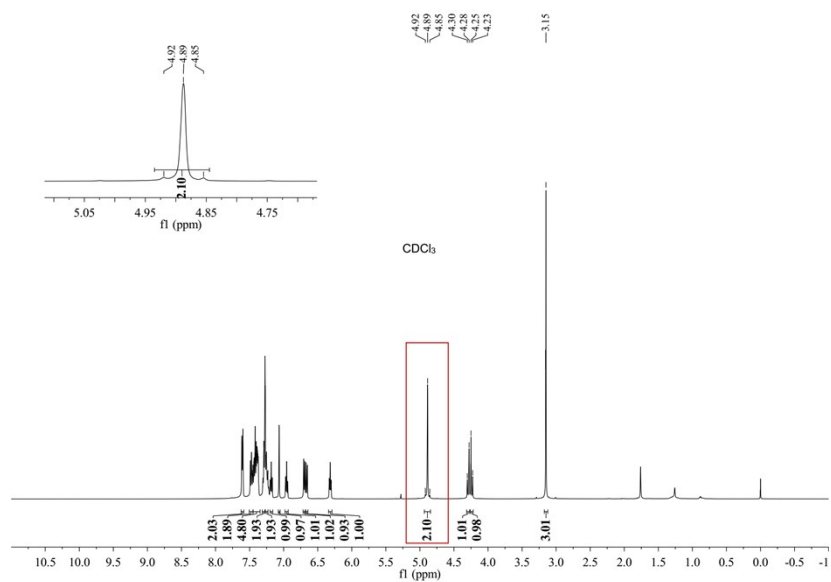

(2) <sup>1</sup>H NMR made in DMSO

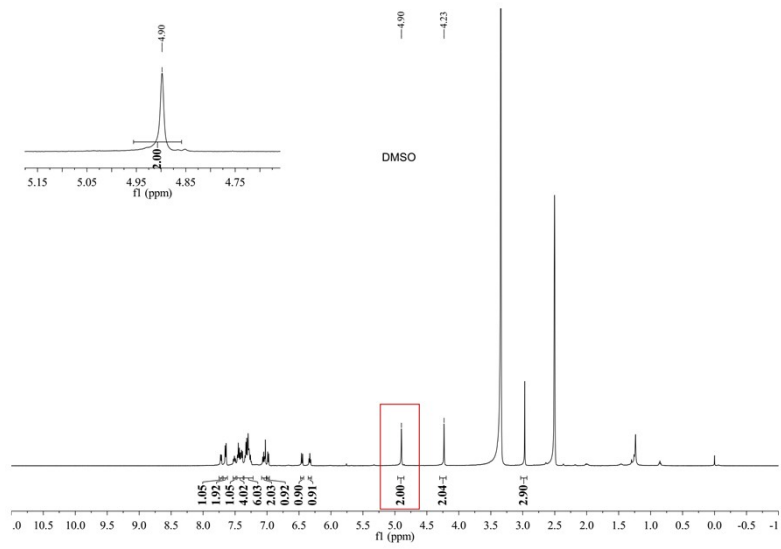

(3)  $^1\text{H}$  NMR made in  $\text{CD}_3\text{CN}$

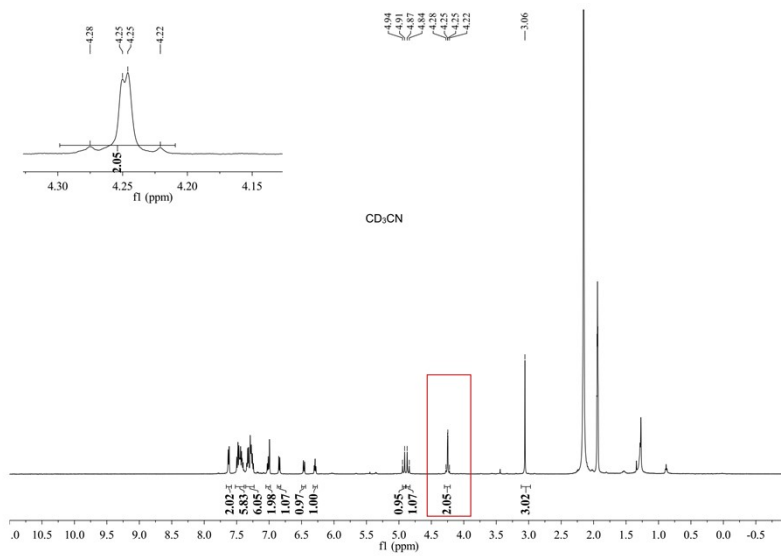



## 5. General Procedure for the *in vitro* Anti-tumor Activity Study

### Cell viability was measured by CCK-8 assay

Human cancer cell line HCT116 was obtained from Cell Cook. Cells were cultured in RPMI1640 medium containing 10% fetal bovine serum and 1% penicillin/streptomycin (Gibco) in a humidified incubator containing 5% CO<sub>2</sub> at 37 °C. Human cancer cell lines MCF-7 was obtained from Procell and cells were cultured in MEM medium containing 10% fetal bovine serum, 1% penicillin/streptomycin (Gibco) and 0.01 mg/mL insulin (Procell) in a humidified incubator containing 5% CO<sub>2</sub> at 37 °C. For cell viability, cells were seeded in 96-well plates at 5000 cells per well. After 24 hours, serially diluted compounds were added and cells were cultured for another 48 hours. Cell viability was measured using a Cell Counting Kit-8 (CCK-8) assay according to the manufacturer's instructions (Yeasen Biotechnology, China).

These representative products **4ac**, **4am**, **4bj**, **4cb**, **4cd**, **4ce**, **4cf**, **4ch**, **4cj**, and **4ck** on cell viability was evaluated *via* CCK8 assay in HCT116 (colon cancer) and MCF-7 (breast cancer) human cancer cell lines, and the *in vitro* anti-tumor activity results have been listed in **Table S1**.

**Table S1.** Anti-tumor Activity Study of Compounds **4ac**, **4am**, **4bj**, **4cb**, **4cd**, **4ce**, **4cf**, **4ch**, **4cj**, and **4ck** (Inhibitory rate at 20 μM)

| Compound   | Cancer cell line |                       |                |                       |
|------------|------------------|-----------------------|----------------|-----------------------|
|            | HCT-116          |                       | MCF-7          |                       |
|            | Inhibition (%)   | IC <sub>50</sub> (μM) | Inhibition (%) | IC <sub>50</sub> (μM) |
| <b>4ac</b> | 92.37 ± 0.76     | 4.173 ± 0.3001        | 69.36 ± 1.37   | --                    |
| <b>4am</b> | 81.81 ± 0.97     | --                    | 54.27 ± 2.1    | --                    |
| <b>4bj</b> | 60.1 ± 5.23      | --                    | 1.85 ± 1.73    | --                    |
| <b>4cb</b> | 94.47 ± 0.42     | 7.664 ± 0.4152        | 78.75 ± 3.37   | 7.761 ± 0.7019        |
| <b>4cd</b> | 98.71 ± 0.13     | 1.546 ± 0.1361        | 76.83 ± 2.79   | --                    |
| <b>4ce</b> | 70.46 ± 3.89     | 18.45 ± 1.52          | 43.52 ± 5.84   | --                    |
| <b>4cf</b> | 99.03 ± 0.08     | 4.498 ± 0.2138        | 98.12 ± 0.26   | 4.789 ± 0.2491        |
| <b>4ch</b> | 81.58 ± 1.8      | 7.741 ± 0.4635        | 85.83 ± 2.1    | 9.343 ± 0.5133        |
| <b>4cj</b> | 98.85 ± 0.2      | 0.989 ± 0.0986        | 91.02 ± 0.1    | 9.797 ± 0.8555        |
| <b>4ck</b> | 97.35 ± 0.1      | 5.306 ± 0.7364        | 53.91 ± 2.89   | --                    |

## 6. References

- [1] a) M. Rubina, M. Rubin and V. Gevorgyan, *J Am Chem Soc.* **2004**, *126*, 3688-3689; b) A. Edwards, M. Rubina and M. Rubin, *Chemistry.* **2018**, *24*, 1394-1403; c) C. Jiang, J. Wu, J. Han, K. Chen, Y. Qian, Z. Zhang and Y. Jiang, *Chem Commun (Camb).* **2021**, *57*, 5710-5713; d) S. Nie, A. Lu, E. L. Kuker and V. M. Dong, *J Am Chem Soc.* **2021**, *143*, 6176-6184.
- [2] a) G. Xu, P. Chen, P. Liu, S. Tang, X. Zhang and J. Sun, *Angew Chem Int Ed Engl.* **2019**, *58*, 1980-1984; b) H. L. Cui, G. Y. Xu, J. Zhu and J. T. Sun, *Organic Chemistry Frontiers.* **2022**, *9*, 1295-1299.
- [3] a) R. H. Wang, Y. L. Li, H. J. He, Y. C. Xiao and F. E. Chen, *Chemistry.* **2021**, *27*, 4302-4306; b) Q. Chen, Y. Teng and F. Xu, *Org Lett.* **2021**, *23*, 4785-4790.
- [4] T. Kamei, A. Ishibashi and T. Shimada, *Tetrahedron Letters.* **2014**, *55*, 4245-4247.
- [5] D. B. Dess and J. C. Martin, *The Journal of Organic Chemistry.* **1983**, *48*, 4155-4156.







## Crystallographic Data for 8.

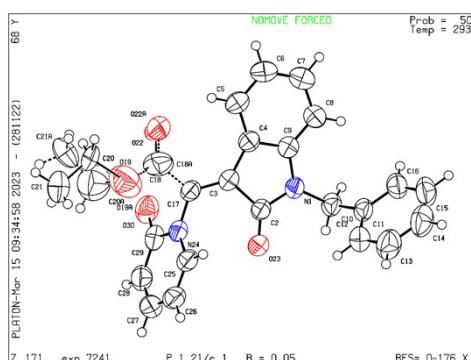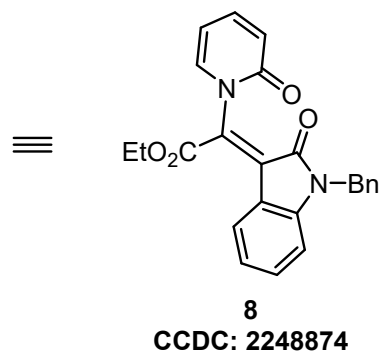

### Datablock: exp\_7241

Bond precision: C-C = 0.0030 Å      Wavelength=1.54184

Cell:                    a=8.6150 (3)      b=9.0762 (3)      c=26.1585 (8)  
                              alpha=90            beta=91.231 (3)    gamma=90

Temperature:            293 K

|                                     | Calculated                                                    | Reported                                                      |
|-------------------------------------|---------------------------------------------------------------|---------------------------------------------------------------|
| Volume                              | 2044.90 (12)                                                  | 2044.90 (12)                                                  |
| Space group                         | P 21/c                                                        | P 1 21/c 1                                                    |
| Hall group                          | -P 2ybc                                                       | -P 2ybc                                                       |
| Moiety formula                      | C <sub>24</sub> H <sub>20</sub> N <sub>2</sub> O <sub>4</sub> | C <sub>24</sub> H <sub>20</sub> N <sub>2</sub> O <sub>4</sub> |
| Sum formula                         | C <sub>24</sub> H <sub>20</sub> N <sub>2</sub> O <sub>4</sub> | C <sub>24</sub> H <sub>20</sub> N <sub>2</sub> O <sub>4</sub> |
| Mr                                  | 400.42                                                        | 400.42                                                        |
| D <sub>x</sub> , g cm <sup>-3</sup> | 1.301                                                         | 1.301                                                         |
| Z                                   | 4                                                             | 4                                                             |
| Mu (mm <sup>-1</sup> )              | 0.730                                                         | 0.730                                                         |
| F <sub>000</sub>                    | 840.0                                                         | 840.0                                                         |
| F <sub>000</sub> '                  | 842.64                                                        |                                                               |
| h, k, lmax                          | 10, 10, 31                                                    | 10, 10, 31                                                    |
| Nref                                | 3645                                                          | 3644                                                          |
| Tmin, Tmax                          | 0.916, 0.964                                                  | 0.822, 1.000                                                  |
| Tmin'                               | 0.896                                                         |                                                               |

Correction method= # Reported T Limits: Tmin=0.822 Tmax=1.000  
AbsCorr = MULTI-SCAN

Data completeness= 1.000      Theta (max)= 67.043

R(reflections)= 0.0489 ( 3148)      wR<sub>2</sub>(reflections)=  
S = 1.039      Npar= 319      0.1518 ( 3644)

## 8. Analytical data of products

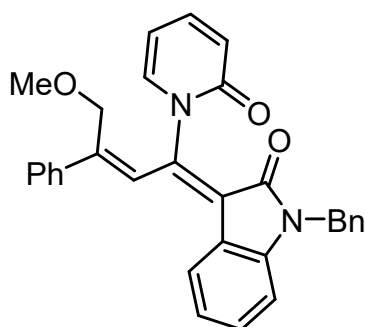

### (*Z*)-1-benzyl-3-((*Z*)-4-methoxy-1-(2-oxopyridin-1(2*H*)-yl)-3-phenylbut-2-en-1-ylidene)indolin-2-one

**4aa:** 90.0 mg, red brown solid, 95% yield.

**<sup>1</sup>H NMR** (500 MHz, CDCl<sub>3</sub>) δ 7.60 (d, *J* = 7.9 Hz, 2H), 7.50 – 7.37 (m, 6H), 7.31 – 7.22 (m, 5H), 7.20 – 7.16 (m, 1H), 7.07 (s, 1H), 6.95 (t, *J* = 7.7 Hz, 1H), 6.68 (dd, *J* = 17.9, 8.5 Hz, 2H), 6.31 (t, *J* = 6.7 Hz, 1H), 4.92 – 4.85 (m, 2H), 4.29 (d, *J* = 13.0 Hz, 1H), 4.24 (d, *J* = 12.4 Hz, 1H), 3.15 (s, 3H).

**<sup>13</sup>C NMR** (125 MHz, CDCl<sub>3</sub>) δ 164.8, 162.1, 146.8, 142.9, 142.2, 140.7, 139.8, 138.8, 135.8, 130.4, 129.1, 128.84, 128.82, 127.7, 127.4, 127.2, 125.3, 125.0, 124.4, 122.4, 122.0, 121.5, 109.3, 105.8, 69.6, 58.3, 43.6.

**HRMS-ESI:** calcd. for C<sub>31</sub>H<sub>27</sub>N<sub>2</sub>O<sub>3</sub> [M+H]<sup>+</sup> : 475.2016; found: 475.2028.

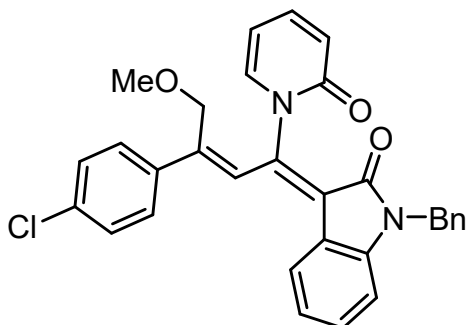

### (*Z*)-1-benzyl-3-((*Z*)-3-(4-chlorophenyl)-4-methoxy-1-(2-oxopyridin-1(2*H*)-yl)but-2-en-1-ylidene)indolin-2-one

**4ab:** 95.6 mg, red brown solid, 94% yield.

**<sup>1</sup>H NMR** (500 MHz, CDCl<sub>3</sub>) δ 7.56 – 7.51 (m, 2H), 7.48 – 7.35 (m, 5H), 7.31 – 7.24 (m, 5H), 7.22 – 7.18 (m, 1H), 7.03 (s, 1H), 6.99 – 6.94 (m, 1H), 6.71 (d, *J* = 7.8 Hz, 1H), 6.66 (d, *J* = 9.3 Hz, 1H), 6.33 (td, *J* = 6.8, 1.1 Hz, 1H), 4.93 – 4.83 (m, 2H), 4.26 (d, *J* = 12.6 Hz, 1H), 4.19 (d, *J* = 12.5 Hz, 1H), 3.13 (s, 3H).

**<sup>13</sup>C NMR** (125 MHz, CDCl<sub>3</sub>) δ 164.7, 162.1, 145.4, 143.0, 141.9, 140.8, 138.8, 138.3, 135.8, 135.1, 130.6, 129.0, 128.9, 128.6, 127.7, 127.5, 125.6, 125.0, 124.7, 122.5, 122.0, 121.4, 109.4, 105.9, 69.4, 58.4, 43.7.

**HRMS-ESI:** calcd. for C<sub>31</sub>H<sub>26</sub>N<sub>2</sub>O<sub>3</sub>Cl [M+H]<sup>+</sup> : 509.1626; found: 509.1635.

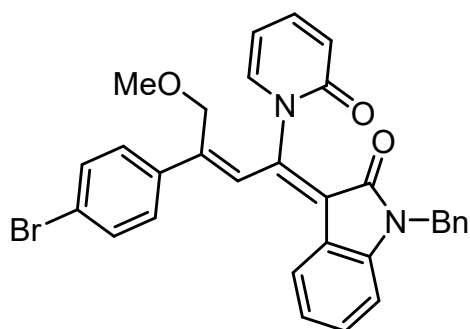

**(Z)-1-benzyl-3-((Z)-3-(4-bromophenyl)-4-methoxy-1-(2-oxopyridin-1(2H)-yl)but-2-en-1-ylidene)indolin-2-one**

**4ac:** 97.4 mg, red brown solid, 88% yield.

**<sup>1</sup>H NMR** (500 MHz, CDCl<sub>3</sub>) δ 7.57 – 7.51 (m, 2H), 7.50 – 7.44 (m, 3H), 7.42 (d, *J* = 7.6 Hz, 1H), 7.36 (d, *J* = 6.1 Hz, 1H), 7.31 – 7.23 (m, 5H), 7.20 (t, *J* = 7.7 Hz, 1H), 7.03 (s, 1H), 6.96 (t, *J* = 7.6 Hz, 1H), 6.71 (d, *J* = 7.8 Hz, 1H), 6.66 (d, *J* = 9.3 Hz, 1H), 6.33 (t, *J* = 6.6 Hz, 1H), 4.96 – 4.83 (m, 2H), 4.26 (d, *J* = 12.5 Hz, 1H), 4.19 (d, *J* = 12.5 Hz, 1H), 3.13 (s, 3H).

**<sup>13</sup>C NMR** (125 MHz, CDCl<sub>3</sub>) δ 164.7, 162.1, 145.5, 142.9, 141.9, 140.8, 138.8, 138.7, 135.8, 132.0, 130.6, 128.9, 128.8, 127.7, 127.4, 125.7, 124.9, 124.7, 123.4, 122.5, 122.0, 121.4, 109.4, 105.9, 69.4, 58.3, 43.7.

**HRMS-ESI:** calcd. for C<sub>31</sub>H<sub>26</sub>N<sub>2</sub>O<sub>3</sub>Br [M+H]<sup>+</sup> : 553.1121; found: 553.1117.

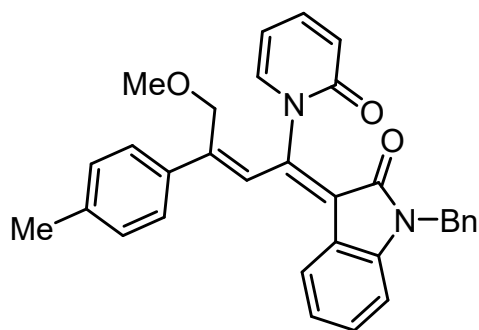

**(Z)-1-benzyl-3-((Z)-4-methoxy-1-(2-oxopyridin-1(2H)-yl)-3-(p-tolyl)but-2-en-1-ylidene)indolin-2-one**

**4ad:** 91.0 mg, red brown solid, 93% yield.

**<sup>1</sup>H NMR** (500 MHz, CDCl<sub>3</sub>) δ 7.52 – 7.43 (m, 4H), 7.39 – 7.35 (m, 1H), 7.30 – 7.21 (m, 7H), 7.19 – 7.15 (m, 1H), 7.05 (s, 1H), 6.94 (t, *J* = 7.7 Hz, 1H), 6.69 (d, *J* = 7.8 Hz, 1H), 6.66 (d, *J* = 9.2 Hz, 1H), 6.31 (td, *J* = 6.8, 1.1 Hz, 1H), 4.89 (s, 2H), 4.28 (d, *J* = 12.5 Hz, 1H), 4.23 (d, *J* = 12.4 Hz, 1H), 3.14 (s, 3H), 2.38 (s, 3H).

**<sup>13</sup>C NMR** (125 MHz, CDCl<sub>3</sub>) δ 164.9, 162.2, 146.9, 142.8, 142.3, 140.6, 139.3, 138.8, 136.9, 135.9, 130.3, 129.6, 128.8, 127.7, 127.4, 127.1, 125.0, 124.5, 124.2, 122.4, 122.0, 121.6, 109.2, 105.8, 69.5, 58.3, 43.6, 21.4.

**HRMS-ESI:** calcd. for C<sub>32</sub>H<sub>29</sub>N<sub>2</sub>O<sub>3</sub> [M+H]<sup>+</sup> : 489.2173; found: 489.2184.



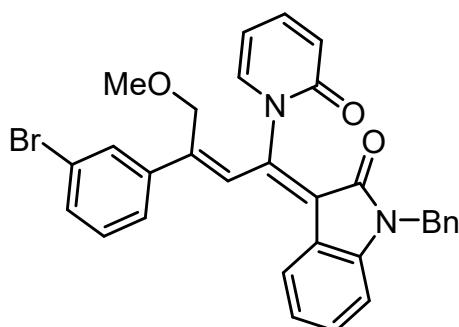

**(Z)-1-benzyl-3-((Z)-3-(3-bromophenyl)-4-methoxy-1-(2-oxopyridin-1(2H)-yl)but-2-en-1-ylidene)indolin-2-one**

**4ae:** 95.0 mg, red brown solid, 86% yield.

**<sup>1</sup>H NMR** (500 MHz, CDCl<sub>3</sub>) δ 7.73 (s, 1H), 7.54 – 7.42 (m, 4H), 7.37 (d, *J* = 6.9 Hz, 1H), 7.31 – 7.18 (m, 7H), 7.02 (s, 1H), 6.98 (t, *J* = 7.7 Hz, 1H), 6.71 (d, *J* = 7.8 Hz, 1H), 6.66 (d, *J* = 9.2 Hz, 1H), 6.33 (t, *J* = 6.7 Hz, 1H), 4.94 – 4.84 (m, 2H), 4.25 (d, *J* = 12.5 Hz, 1H), 4.18 (d, *J* = 12.4 Hz, 1H), 3.15 (s, 3H).

**<sup>13</sup>C NMR** (125 MHz, CDCl<sub>3</sub>) δ 164.7, 162.0, 145.1, 143.0, 142.0, 141.7, 140.8, 138.9, 135.7, 132.0, 130.6, 130.3, 130.2, 128.9, 127.7, 127.4, 126.3, 125.9, 125.0, 124.8, 123.0, 122.5, 122.0, 121.4, 109.4, 105.9, 69.5, 58.4, 43.7.

**HRMS-ESI:** calcd. for C<sub>31</sub>H<sub>26</sub>N<sub>2</sub>O<sub>3</sub>Br [M+H]<sup>+</sup> : 553.1121; found: 553.1138.

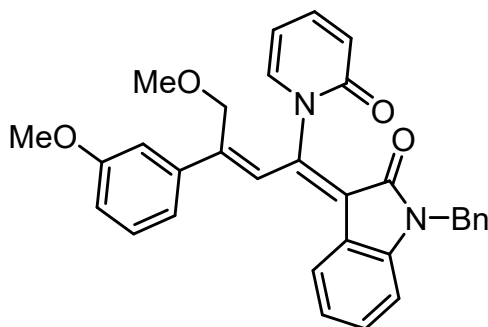

**(Z)-1-benzyl-3-((Z)-4-methoxy-3-(3-methoxyphenyl)-1-(2-oxopyridin-1(2H)-yl)but-2-en-1-ylidene)indolin-2-one**

**4af:** 96.8 mg, red brown solid, 96% yield.

**<sup>1</sup>H NMR** (500 MHz, CDCl<sub>3</sub>) δ 7.50 – 7.44 (m, 2H), 7.40 – 7.23 (m, 7H), 7.21 – 7.17 (m, 2H), 7.13 (s, 1H), 7.07 (s, 1H), 6.99 – 6.92 (m, 2H), 6.70 (d, *J* = 7.8 Hz, 1H), 6.66 (d, *J* = 9.3 Hz, 1H), 6.32 (t, *J* = 6.7 Hz, 1H), 4.94 – 4.84 (m, 2H), 4.26 (d, *J* = 12.3 Hz, 1H), 4.21 (d, *J* = 12.3 Hz, 1H), 3.84 (s, 3H), 3.15 (s, 3H).

**<sup>13</sup>C NMR** (125 MHz, CDCl<sub>3</sub>) δ 164.8, 162.2, 159.9, 146.7, 142.9, 142.1, 141.4, 140.7, 138.9, 135.8, 130.4, 129.8, 128.9, 127.7, 127.4, 125.5, 125.1, 124.5, 122.5, 121.9, 121.5, 119.6, 114.6, 112.9, 109.3, 105.9, 69.7, 58.4, 55.5, 43.6.

**HRMS-ESI:** calcd. for C<sub>32</sub>H<sub>29</sub>N<sub>2</sub>O<sub>4</sub> [M+H]<sup>+</sup> : 505.2122; found: 505.2119.

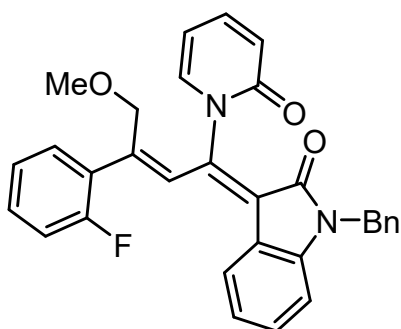

**(Z)-1-benzyl-3-((Z)-3-(2-fluorophenyl)-4-methoxy-1-(2-oxopyridin-1(2H)-yl)but-2-en-1-ylidene)indolin-2-one**

**4ag:** 58.1 mg, red brown solid, 59% yield.

**<sup>1</sup>H NMR** (500 MHz, CDCl<sub>3</sub>) δ 7.60 (d, *J* = 7.6 Hz, 1H), 7.51 – 7.44 (m, 2H), 7.40 – 7.34 (m, 2H), 7.31 – 7.17 (m, 7H), 7.16 – 7.09 (m, 1H), 7.02 – 6.95 (m, 2H), 6.73 – 6.64 (m, 2H), 6.33 (t, *J* = 6.7 Hz, 1H), 4.95 – 4.83 (m, 2H), 4.26 (d, *J* = 13.0 Hz, 1H), 4.19 (d, *J* = 13.0 Hz, 1H), 3.12 (s, 3H).

**<sup>13</sup>C NMR** (125 MHz, CDCl<sub>3</sub>) δ 164.8, 162.0, 160.2 (d, *J* = 248.5 Hz), 143.7 (d, *J* = 1.6 Hz), 142.9, 141.7, 140.8, 139.0, 135.8, 130.6 (d, *J* = 3.5 Hz), 130.5, 130.4 (d, *J* = 8.3 Hz), 128.9, 128.0 (d, *J* = 13.5 Hz), 127.7, 127.7 (d, *J* = 2.5 Hz), 127.4, 125.1, 124.6, 124.6, 122.5, 122.0, 121.3, 116.1 (d, *J* = 22.5 Hz), 109.3, 105.9, 70.3 (d, *J* = 3.3 Hz), 58.4, 43.7.

**<sup>19</sup>F NMR** (376 MHz, CDCl<sub>3</sub>) δ -114.38.

**HRMS-ESI:** calcd. for C<sub>31</sub>H<sub>26</sub>N<sub>2</sub>O<sub>3</sub>F [M+H]<sup>+</sup> : 493.1922; found: 493.1925.

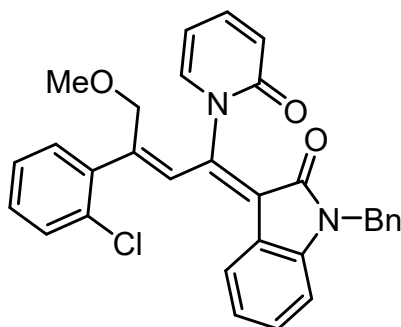

**(Z)-1-benzyl-3-((Z)-3-(2-chlorophenyl)-4-methoxy-1-(2-oxopyridin-1(2H)-yl)but-2-en-1-ylidene)indolin-2-one**

**4ah:** 27.4 mg, red brown solid, 37% yield.

**<sup>1</sup>H NMR** (500 MHz, CDCl<sub>3</sub>) δ 7.63 (d, *J* = 7.6 Hz, 1H), 7.49 – 7.40 (m, 4H), 7.32 – 7.27 (m, 5H), 7.26 – 7.17 (m, 3H), 6.99 (t, *J* = 7.6 Hz, 1H), 6.79 (s, 1H), 6.72 – 6.66 (m, 2H), 6.34 (t, *J* = 6.7 Hz, 1H), 4.94 – 4.83 (m, 2H), 4.20 (d, *J* = 13.2 Hz, 1H), 4.14 (d, *J* = 13.2 Hz, 1H), 3.12 (s, 3H).

**<sup>13</sup>C NMR** (125 MHz, CDCl<sub>3</sub>) δ 164.8, 162.0, 147.0, 142.9, 141.7, 140.8, 139.8, 139.2, 135.8, 132.4, 131.1, 130.5, 129.9, 129.6, 128.9, 127.72, 127.70, 127.4, 127.1, 125.3, 124.4, 122.5, 121.9, 121.4, 109.3, 105.7, 70.6, 58.7, 43.7.

**HRMS-ESI:** calcd. for C<sub>31</sub>H<sub>26</sub>N<sub>2</sub>O<sub>3</sub>Cl [M+H]<sup>+</sup> : 509.1626; found: 509.1645.

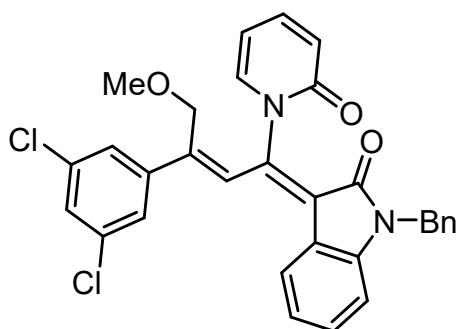

**(Z)-1-benzyl-3-((Z)-3-(3,5-dichlorophenyl)-4-methoxy-1-(2-oxopyridin-1(2H)-yl)but-2-en-1-ylidene)indolin-2-one**

**4ai:** 93.2 mg, red brown solid, 86% yield.

**<sup>1</sup>H NMR** (500 MHz, CDCl<sub>3</sub>) δ 7.68 (d, *J* = 1.7 Hz, 1H), 7.49 – 7.35 (m, 5H), 7.32 – 7.19 (m, 6H), 7.02 (s, 1H), 6.98 (t, *J* = 7.7 Hz, 1H), 6.72 (d, *J* = 7.8 Hz, 1H), 6.66 (d, *J* = 9.3 Hz, 1H), 6.34 (t, *J* = 6.7 Hz, 1H), 4.97 – 4.83 (m, 2H), 4.24 (d, *J* = 12.5 Hz, 1H), 4.16 (d, *J* = 12.5 Hz, 1H), 3.14 (s, 3H).

**<sup>13</sup>C NMR** (125 MHz, CDCl<sub>3</sub>) δ 164.7, 162.0, 144.1, 143.0, 141.5, 140.9, 139.8, 138.9, 135.7, 133.2, 133.1, 130.8, 129.1, 128.9, 127.8, 127.4, 126.53, 126.50, 124.98, 124.95, 122.6, 122.1, 121.3, 109.5, 106.0, 69.3, 58.4, 43.7.

**HRMS-ESI:** calcd. for C<sub>31</sub>H<sub>25</sub>N<sub>2</sub>O<sub>3</sub>Cl<sub>2</sub> [M+H]<sup>+</sup> : 543.1237; found: 543.1246.

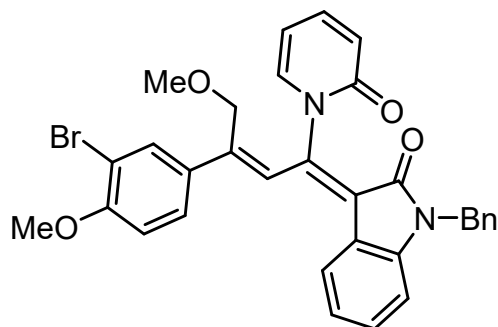

**(Z)-1-benzyl-3-((Z)-3-(3-bromo-4-methoxyphenyl)-4-methoxy-1-(2-oxopyridin-1(2H)-yl)but-2-en-1-ylidene)indolin-2-one**

**4aj:** 107.1 mg, red brown solid, 92% yield.

**<sup>1</sup>H NMR** (500 MHz, CDCl<sub>3</sub>) δ 7.80 (s, 1H), 7.55 (d, *J* = 8.5 Hz, 1H), 7.47 – 7.42 (m, 2H), 7.36 (d, *J* = 6.8 Hz, 1H), 7.31 – 7.27 (m, 3H), 7.26 – 7.17 (m, 3H), 7.00 – 6.91 (m, 3H), 6.70 (d, *J* = 7.8 Hz, 1H), 6.66 (d, *J* = 9.3 Hz, 1H), 6.33 (t, *J* = 6.7 Hz, 1H), 4.93 – 4.84 (m, 2H), 4.24 (d, *J* = 12.5 Hz, 1H), 4.18 (d, *J* = 12.5 Hz, 1H), 3.92 (s, 3H), 3.14 (s, 3H).

**<sup>13</sup>C NMR** (125 MHz, CDCl<sub>3</sub>) δ 164.8, 162.1, 156.6, 145.0, 142.8, 141.9, 140.7, 138.8, 135.8, 133.4, 132.0, 130.4, 128.8, 127.67, 127.65, 127.4, 124.9, 124.6, 124.4, 122.4, 121.9, 121.5, 112.1, 111.9, 109.3, 106.0, 69.3, 58.3, 56.5, 43.6.

**HRMS-ESI:** calcd. for C<sub>32</sub>H<sub>28</sub>N<sub>2</sub>O<sub>4</sub>Br [M+H]<sup>+</sup> : 583.1227; found: 583.1230.

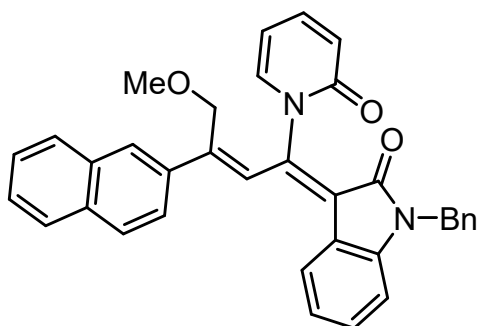

**(Z)-1-benzyl-3-((Z)-4-methoxy-3-(naphthalen-2-yl)-1-(2-oxopyridin-1(2H)-yl)but-2-en-1-ylidene)indolin-2-one**

**4ak:** 82.8 mg, yellow solid, 79% yield.

**<sup>1</sup>H NMR** (500 MHz, CDCl<sub>3</sub>) δ 8.08 (s, 1H), 7.90 – 7.83 (m, 3H), 7.72 (dd, *J* = 8.6, 1.8 Hz, 1H), 7.52 – 7.45 (m, 4H), 7.44 – 7.40 (m, 1H), 7.32 – 7.25 (m, 5H), 7.21 – 7.16 (m, 2H), 6.93 (td, *J* = 7.7, 0.8 Hz, 1H), 6.73 – 6.66 (m, 2H), 6.34 (td, *J* = 6.8, 1.2 Hz, 1H), 4.95 – 4.84 (m, 2H), 4.39 (d, *J* = 12.5 Hz, 1H), 4.35 (d, *J* = 12.5 Hz, 1H), 3.18 (s, 3H).

**<sup>13</sup>C NMR** (125 MHz, CDCl<sub>3</sub>) δ 164.9, 162.2, 146.9, 142.9, 142.3, 140.8, 139.0, 137.3, 135.9, 133.6, 133.4, 130.4, 128.9, 128.7, 128.5, 127.8, 127.7, 127.5, 126.94, 126.89, 126.7, 125.9, 125.1, 124.7, 124.5, 122.5, 122.0, 121.6, 109.3, 105.9, 69.6, 58.4, 43.7.

**HRMS-ESI:** calcd. for C<sub>35</sub>H<sub>29</sub>N<sub>2</sub>O<sub>3</sub> [M+H]<sup>+</sup> : 525.2173; found: 525.2178.

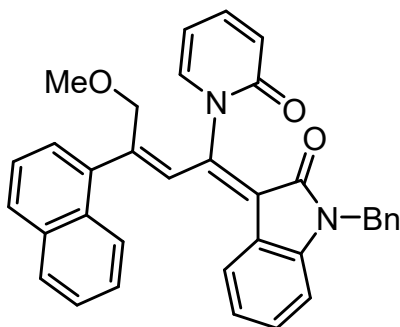

**(Z)-1-benzyl-3-((Z)-4-methoxy-3-(naphthalen-1-yl)-1-(2-oxopyridin-1(2H)-yl)but-2-en-1-ylidene)indolin-2-one**

**4al:** 38.8 mg, red brown solid, 37% yield.

**<sup>1</sup>H NMR** (500 MHz, CDCl<sub>3</sub>) δ 8.21 (d, *J* = 8.2 Hz, 1H), 7.88 (dd, *J* = 17.4, 7.9 Hz, 2H), 7.59 – 7.48 (m, 7H), 7.44 (d, *J* = 7.7 Hz, 1H), 7.31 – 7.26 (m, 4H), 7.14 (t, *J* = 7.7 Hz, 1H), 7.00 (s, 1H), 6.87 (t, *J* = 7.6 Hz, 1H), 6.73 (d, *J* = 9.7 Hz, 1H), 6.68 (d, *J* = 7.8 Hz, 1H), 6.38 (t, *J* = 6.7 Hz, 1H), 4.95 – 4.81 (m, 2H), 4.16 (d, *J* = 12.4 Hz, 1H), 4.07 (d, *J* = 12.4 Hz, 1H), 3.15 (s, 3H).

**<sup>13</sup>C NMR** (125 MHz, CDCl<sub>3</sub>) δ 165.0, 162.0, 147.4, 143.0, 142.8, 141.0, 140.3, 139.7, 135.8, 133.9, 131.4, 130.3, 128.9, 128.6, 127.9, 127.7, 127.5, 126.9, 126.31, 126.25, 125.7, 125.4, 125.3, 123.8, 122.5, 121.69, 121.66, 109.2, 105.4, 72.0, 58.7, 43.6.

**HRMS-ESI:** calcd. for C<sub>35</sub>H<sub>29</sub>N<sub>2</sub>O<sub>3</sub> [M+H]<sup>+</sup> : 525.2173; found: 525.2177.

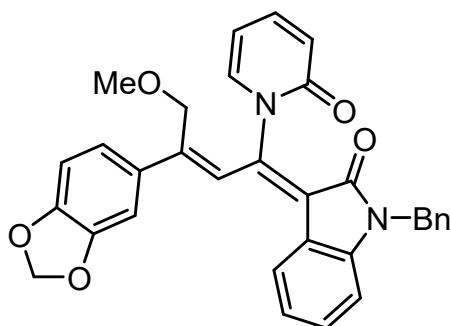

**(Z)-3-((Z)-3-(benzo[d][1,3]dioxol-5-yl)-4-methoxy-1-(2-oxopyridin-1(2H)-yl)but-2-en-1-ylidene)-1-benzylindolin-2-one**

**4am:** 99.5 mg, red brown solid, 96% yield.

**<sup>1</sup>H NMR** (500 MHz, CDCl<sub>3</sub>) δ 7.47 – 7.43 (m, 2H), 7.35 (dd, *J* = 6.9, 1.6 Hz, 1H), 7.30 – 7.23 (m, 5H), 7.20 – 7.09 (m, 3H), 6.99 – 6.95 (m, 2H), 6.85 (d, *J* = 8.1 Hz, 1H), 6.70 (d, *J* = 7.8 Hz, 1H), 6.66 (d, *J* = 9.3 Hz, 1H), 6.31 (td, *J* = 6.8, 1.0 Hz, 1H), 6.00 (s, 2H), 4.89 (s, 2H), 4.23 (d, *J* = 12.4 Hz, 1H), 4.17 (d, *J* = 12.3 Hz, 1H), 3.14 (s, 3H).

**<sup>13</sup>C NMR** (125 MHz, CDCl<sub>3</sub>) δ 164.9, 162.2, 148.6, 148.2, 146.4, 142.8, 142.2, 140.7, 138.8, 135.9, 134.0, 130.3, 128.8, 127.7, 127.4, 125.0, 124.2, 122.4, 122.0, 121.60, 121.56, 109.3, 108.6, 107.5, 105.9, 101.6, 69.6, 58.4, 43.6.

**HRMS-ESI:** calcd. for C<sub>32</sub>H<sub>27</sub>N<sub>2</sub>O<sub>5</sub> [M+H]<sup>+</sup> : 519.1914; found: 519.1916.

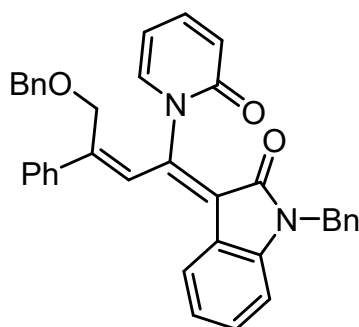

**(Z)-1-benzyl-3-((Z)-4-(benzyloxy)-1-(2-oxopyridin-1(2H)-yl)-3-phenylbut-2-en-1-ylidene)indolin-2-one**

**4an:** 101.2 mg, red brown solid, 92% yield.

**<sup>1</sup>H NMR** (400 MHz, CDCl<sub>3</sub>) δ 7.62 – 7.58 (m, 2H), 7.52 (d, *J* = 7.6 Hz, 1H), 7.43 – 7.38 (m, 4H), 7.32 – 7.26 (m, 4H), 7.24 – 7.17 (m, 6H), 7.12 – 7.08 (m, 3H), 6.97 (td, *J* = 7.7, 0.8 Hz, 1H), 6.71 (d, *J* = 7.8 Hz, 1H), 6.63 (d, *J* = 9.2 Hz, 1H), 6.21 (td, *J* = 6.8, 1.2 Hz, 1H), 4.88 (s, 2H), 4.37 (s, 2H), 4.35 – 4.28 (m, 2H).

**<sup>13</sup>C NMR** (125 MHz, CDCl<sub>3</sub>) δ 164.7, 162.1, 146.6, 142.9, 142.3, 140.7, 139.7, 138.8, 137.7, 135.8, 130.4, 129.1, 128.9, 128.8, 128.4, 128.0, 127.9, 127.7, 127.4, 127.3, 125.5, 125.0, 124.3, 122.5, 121.9, 121.5, 109.3, 105.9, 72.6, 67.2, 43.6.

**HRMS-ESI:** calcd. for C<sub>37</sub>H<sub>31</sub>N<sub>2</sub>O<sub>3</sub> [M+H]<sup>+</sup> : 551.2329; found: 551.2344.

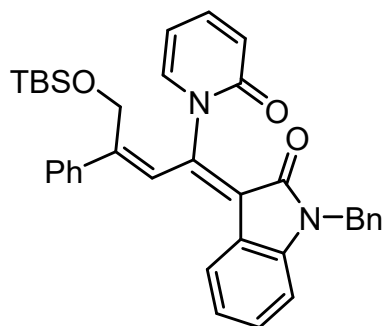

**(Z)-1-benzyl-3-((Z)-4-((tert-butyldimethylsilyloxy)-1-(2-oxopyridin-1(2H)-yl)-3-phenylbut-2-en-1-ylidene)indolin-2-one**

**4ao:** 104.5 mg, red brown solid, 91% yield.

**<sup>1</sup>H NMR** (500 MHz, CDCl<sub>3</sub>) δ 7.58 – 7.52 (m, 3H), 7.45 – 7.35 (m, 5H), 7.31 – 7.26 (m, 3H), 7.26 – 7.22 (m, 2H), 7.17 (t, *J* = 7.7 Hz, 1H), 6.95 (t, *J* = 7.7 Hz, 1H), 6.87 (s, 1H), 6.70 – 6.64 (m, 2H), 6.30 (t, *J* = 6.7 Hz, 1H), 4.94 – 4.84 (m, 2H), 4.58 (d, *J* = 13.3 Hz, 1H), 4.51 (d, *J* = 13.3 Hz, 1H), 0.70 (s, 9H), -0.11 (s, 3H), -0.13 (s, 3H).

**<sup>13</sup>C NMR** (125 MHz, CDCl<sub>3</sub>) δ 164.9, 162.1, 150.1, 142.8, 142.2, 140.6, 139.9, 138.3, 135.9, 130.3, 128.84, 128.80, 128.5, 127.68, 127.66, 127.4, 124.9, 124.1, 123.6, 122.4, 122.1, 121.5, 109.2, 106.1, 60.8, 43.6, 25.8, 18.2, -5.36, -5.41.

**HRMS-ESI:** calcd. for C<sub>36</sub>H<sub>39</sub>N<sub>2</sub>O<sub>3</sub>Si [M+H]<sup>+</sup> : 575.2724; found: 575.2746.

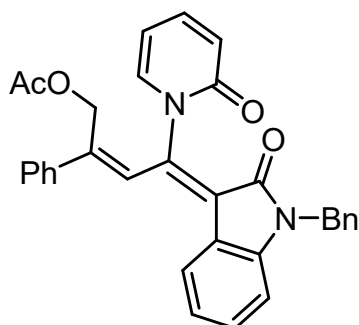

**(Z)-4-((Z)-1-benzyl-2-oxoindolin-3-ylidene)-4-(2-oxopyridin-1(2H)-yl)-2-phenylbut-2-en-1-yl acetate**

**4ap:** 94.4 mg, red brown solid, 94% yield.

**<sup>1</sup>H NMR** (400 MHz, CDCl<sub>3</sub>) δ 7.61 – 7.56 (m, 2H), 7.47 – 7.40 (m, 6H), 7.33 – 7.26 (m, 4H), 7.25 – 7.17 (m, 2H), 7.13 (s, 1H), 6.96 (t, *J* = 7.4 Hz, 1H), 6.71 (d, *J* = 7.8 Hz, 1H), 6.65 (d, *J* = 9.2 Hz, 1H), 6.32 (td, *J* = 6.8, 1.1 Hz, 1H), 4.99 – 4.83 (m, 4H), 1.84 (s, 3H).

**<sup>13</sup>C NMR** (100 MHz, CDCl<sub>3</sub>) δ 170.5, 164.6, 161.9, 143.6, 143.0, 141.6, 140.6, 138.8, 138.5, 135.7, 130.7, 129.3, 128.92, 128.87, 127.7, 127.4, 127.1, 126.7, 125.0, 124.9, 122.5, 122.2, 121.3, 109.4, 106.2, 61.4, 43.7, 20.8.

**HRMS-ESI:** calcd. for C<sub>32</sub>H<sub>26</sub>N<sub>2</sub>O<sub>4</sub> [M+H]<sup>+</sup> : 503.1965; found: 503.1973.

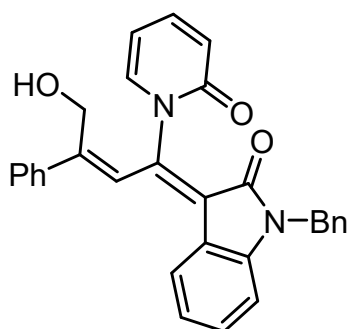

**(Z)-1-benzyl-3-((Z)-4-hydroxy-1-(2-oxopyridin-1(2H)-yl)-3-phenylbut-2-en-1-ylidene)indolin-2-one**

**4aq:** 16.6 mg, red brown solid, 38% yield.

<sup>1</sup>H NMR (500 MHz, CDCl<sub>3</sub>) δ 7.83 (d, *J* = 6.5 Hz, 1H), 7.26 – 7.23 (m, 5H), 7.17 – 7.08 (m, 6H), 7.04 – 6.96 (m, 4H), 6.67 – 6.61 (m, 2H), 6.35 (d, *J* = 8.0 Hz, 1H), 5.72 – 5.67 (m, 1H), 4.86 (d, *J* = 15.7 Hz, 1H), 4.77 (d, *J* = 15.7 Hz, 1H), 4.49 (d, *J* = 17.4 Hz, 1H), 4.36 (d, *J* = 17.5 Hz, 1H).

<sup>13</sup>C NMR (125 MHz, CDCl<sub>3</sub>) δ 164.8, 161.8, 153.7, 143.7, 142.5, 140.7, 139.0, 137.3, 135.9, 130.0, 128.8, 128.4, 128.2, 127.7, 127.5, 125.3, 123.3, 122.6, 121.7, 121.2, 120.0, 109.0, 105.7, 67.2, 43.5.

**HRMS-ESI:** calcd. for C<sub>30</sub>H<sub>25</sub>N<sub>2</sub>O<sub>4</sub> [M+H]<sup>+</sup>: 461.1860; found: 461.1862.

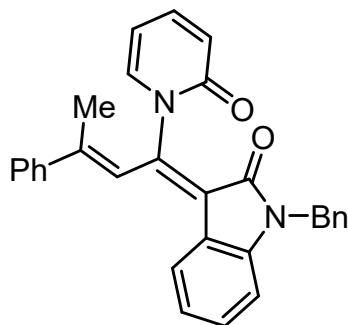

**(Z)-1-benzyl-3-((E)-1-(2-oxopyridin-1(2H)-yl)-3-phenylbut-2-en-1-ylidene)indolin-2-one**

**4ar:** 58.6 mg, red brown solid, 66% yield.

<sup>1</sup>H NMR (500 MHz, CDCl<sub>3</sub>) δ 7.59 – 7.55 (m, 2H), 7.51 (d, *J* = 7.7 Hz, 1H), 7.46 – 7.36 (m, 4H), 7.32 – 7.26 (m, 5H), 7.25 – 7.16 (m, 2H), 7.01 – 6.95 (m, 2H), 6.72 – 6.66 (m, 2H), 6.32 (td, *J* = 6.9, 1.2 Hz, 1H), 4.93 (d, *J* = 15.8 Hz, 1H), 4.86 (d, *J* = 15.8 Hz, 1H), 2.11 (d, *J* = 1.2 Hz, 3H).

<sup>13</sup>C NMR (125 MHz, CDCl<sub>3</sub>) δ 165.1, 162.4, 148.5, 142.9, 142.8, 142.5, 140.5, 137.4, 135.9, 130.1, 129.0, 128.82, 128.80, 127.6, 127.4, 126.6, 124.9, 123.7, 122.4, 122.34, 122.29, 121.5, 109.2, 106.6, 43.6, 17.7.

**HRMS-ESI:** calcd. for C<sub>30</sub>H<sub>25</sub>N<sub>2</sub>O<sub>2</sub> [M+H]<sup>+</sup>: 445.1911; found: 445.1913.

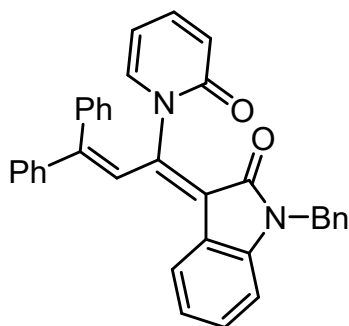

**(Z)-1-benzyl-3-(1-(2-oxopyridin-1(2H)-yl)-3,3-diphenylallylidene)indolin-2-one**

**4as:** 97.2 mg, red brown solid, 96% yield.

**<sup>1</sup>H NMR** (400 MHz, CDCl<sub>3</sub>) δ 7.61 (d, *J* = 7.6 Hz, 1H), 7.40 – 7.34 (m, 5H), 7.33 – 7.27 (m, 4H), 7.26 – 7.18 (m, 6H), 7.09 – 6.98 (m, 4H), 6.72 (d, *J* = 7.8 Hz, 1H), 6.65 (dd, *J* = 6.9, 1.6 Hz, 1H), 6.30 (d, *J* = 9.1 Hz, 1H), 5.67 (td, *J* = 6.8, 1.1 Hz, 1H), 4.92 (d, *J* = 15.7 Hz, 1H), 4.81 (d, *J* = 15.7 Hz, 1H).

**<sup>13</sup>C NMR** (100 MHz, CDCl<sub>3</sub>) δ 164.8, 161.4, 151.5, 143.8, 142.7, 141.3, 140.0, 139.0, 138.8, 136.0, 130.1, 129.6, 129.4, 128.83, 128.77, 128.6, 128.53, 128.47, 127.7, 127.5, 124.8, 123.9, 123.3, 122.5, 122.2, 121.5, 109.2, 105.0, 43.6.

**HRMS-ESI:** calcd. for C<sub>35</sub>H<sub>26</sub>N<sub>2</sub>O<sub>2</sub> [M+H]<sup>+</sup>: 507.2067; found: 507.2076.

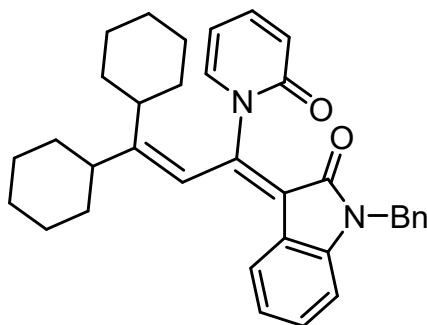

**(Z)-1-benzyl-3-(3,3-dicyclohexyl-1-(2-oxopyridin-1(2H)-yl)allylidene)indolin-2-one**

**4at:** 46.6 mg, yellow solid, 45% yield.

**<sup>1</sup>H NMR** (500 MHz, CDCl<sub>3</sub>) δ 7.58 (d, *J* = 7.4 Hz, 1H), 7.45 – 7.34 (m, 2H), 7.26 – 7.12 (m, 6H), 7.02 (t, *J* = 7.3 Hz, 1H), 6.70 – 6.61 (m, 2H), 6.48 (s, 1H), 6.27 (t, *J* = 6.2 Hz, 1H), 4.92 – 4.83 (m, 2H), 2.43 – 2.36 (m, 1H), 2.18 – 2.12 (m, 1H), 1.85 – 1.72 (m, 6H), 1.66 – 1.54 (m, 4H), 1.45 – 1.31 (m, 6H), 1.13 – 0.99 (m, 4H).

**<sup>13</sup>C NMR** (125 MHz, CDCl<sub>3</sub>) δ 165.8, 165.1, 162.0, 144.3, 142.4, 140.2, 138.3, 136.0, 129.5, 128.8, 127.6, 127.4, 124.9, 122.4, 122.2, 122.1, 119.5, 109.1, 105.9, 43.5, 43.3, 40.9, 34.8, 34.6, 30.4, 30.2, 29.8, 27.0, 26.9, 26.21, 26.15, 26.0.

**HRMS-ESI:** calcd. for C<sub>35</sub>H<sub>39</sub>N<sub>2</sub>O<sub>2</sub> [M+H]<sup>+</sup>: 519.3006; found: 519.3004.



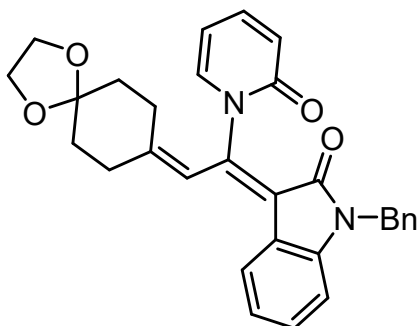

**(Z)-1-benzyl-3-(1-(2-oxopyridin-1(2H)-yl)-2-(1,4-dioxaspiro[4.5]decan-8-ylidene)ethylidene)indolin-2-one**

**4au:** 95.0 mg, red brown solid, 99% yield.

**<sup>1</sup>H NMR** (500 MHz, CDCl<sub>3</sub>) δ 7.53 (d, *J* = 7.3 Hz, 1H), 7.43 – 7.39 (m, 1H), 7.33 – 7.26 (m, 4H), 7.24 – 7.16 (m, 3H), 7.01 (t, *J* = 7.6 Hz, 1H), 6.71 – 6.63 (m, 2H), 6.45 (s, 1H), 6.28 (t, *J* = 6.1 Hz, 1H), 4.90 (d, *J* = 15.7 Hz, 1H), 4.84 (d, *J* = 15.8 Hz, 1H), 3.99 – 3.92 (m, 4H), 2.61 – 2.53 (m, 2H), 2.31 – 2.25 (m, 2H), 1.89 – 1.83 (m, 2H), 1.66 – 1.64 (m, 2H).

**<sup>13</sup>C NMR** (125 MHz, CDCl<sub>3</sub>) δ 165.1, 162.1, 152.9, 142.7, 142.6, 140.4, 137.5, 136.0, 130.0, 128.8, 127.6, 127.4, 124.7, 123.2, 122.3, 122.2, 121.5, 119.0, 109.2, 108.0, 106.4, 64.6, 43.6, 36.1, 35.1, 34.8, 27.2.

**HRMS-ESI:** calcd. for C<sub>30</sub>H<sub>29</sub>N<sub>2</sub>O<sub>4</sub> [M+H]<sup>+</sup> : 481.2122; found: 481.2123.

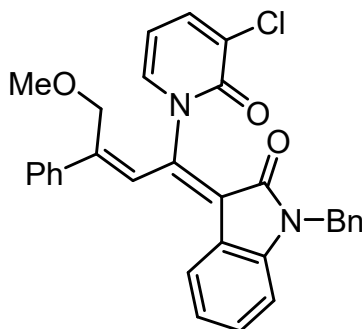

**(Z)-1-benzyl-3-((Z)-1-(3-chloro-2-oxopyridin-1(2H)-yl)-4-methoxy-3-phenylbut-2-en-1-ylidene)indolin-2-one**

**4ba:** 95.5 mg, red brown solid, 94% yield.

**<sup>1</sup>H NMR** (400 MHz, CDCl<sub>3</sub>) δ 7.65 – 7.59 (m, 3H), 7.51 – 7.48 (m, 1H), 7.46 – 7.34 (m, 5H), 7.33 – 7.27 (m, 4H), 7.23 – 7.18 (m, 1H), 7.02 (s, 1H), 6.97 (t, *J* = 7.7 Hz, 1H), 6.71 (d, *J* = 7.8 Hz, 1H), 6.29 (t, *J* = 7.1 Hz, 1H), 4.93 – 4.83 (m, 2H), 4.28 (d, *J* = 12.5 Hz, 1H), 4.24 (d, *J* = 12.5 Hz, 1H), 3.16 (s, 3H).

**<sup>13</sup>C NMR** (100 MHz, CDCl<sub>3</sub>) δ 164.7, 158.3, 146.9, 143.0, 141.7, 139.7, 138.5, 137.7, 135.7, 130.6, 129.2, 128.88, 128.85, 127.7, 127.4, 127.2, 126.9, 125.0, 124.7, 124.5, 122.5, 121.3, 109.4, 105.2, 69.9, 58.4, 43.7.

**HRMS-ESI:** calcd. for C<sub>31</sub>H<sub>26</sub>N<sub>2</sub>O<sub>3</sub>Cl [M+H]<sup>+</sup> : 509.1626; found: 509.1621.

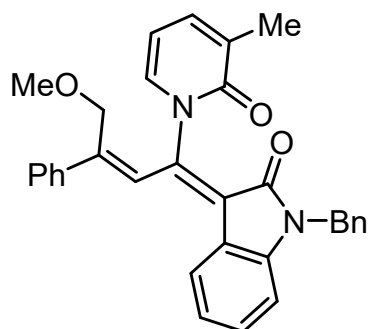

**(Z)-1-benzyl-3-((Z)-4-methoxy-1-(3-methyl-2-oxopyridin-1(2H)-yl)-3-phenylbut-2-en-1-ylidene)indolin-2-one**

**4bb:** 78.1 mg, red brown solid, 80% yield.

<sup>1</sup>H NMR (400 MHz, CDCl<sub>3</sub>) δ 7.64 – 7.60 (m, 2H), 7.49 (d, *J* = 7.7 Hz, 1H), 7.45 – 7.36 (m, 4H), 7.31 (d, *J* = 7.3 Hz, 4H), 7.26 – 7.16 (m, 3H), 7.07 (s, 1H), 6.95 (t, *J* = 7.7 Hz, 1H), 6.70 (d, *J* = 7.9 Hz, 1H), 6.26 (td, *J* = 6.8, 1.5 Hz, 1H), 4.92 (d, *J* = 15.7 Hz, 1H), 4.85 (d, *J* = 15.7 Hz, 1H), 4.29 (d, *J* = 12.3 Hz, 1H), 4.23 (d, *J* = 12.3 Hz, 1H), 3.12 (d, *J* = 1.6 Hz, 3H), 2.19 (s, 3H).

<sup>13</sup>C NMR (100 MHz, CDCl<sub>3</sub>) δ 164.8, 162.4, 146.2, 143.0, 142.8, 139.8, 137.7, 136.2, 135.9, 130.9, 130.3, 129.0, 128.84, 128.80, 127.7, 127.5, 127.2, 125.5, 124.9, 124.2, 122.4, 121.6, 109.2, 105.8, 69.5, 58.2, 43.7, 17.4.

**HRMS-ESI:** calcd. for C<sub>32</sub>H<sub>29</sub>N<sub>2</sub>O<sub>3</sub> [M+H]<sup>+</sup> : 489.2173; found: 489.2171.

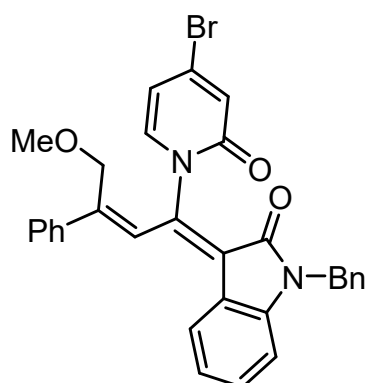

**(Z)-1-benzyl-3-((Z)-1-(4-bromo-2-oxopyridin-1(2H)-yl)-4-methoxy-3-phenylbut-2-en-1-ylidene)indolin-2-one**

**4bc:** 40.8 mg, red brown solid, 37% yield.

<sup>1</sup>H NMR (500 MHz, CDCl<sub>3</sub>) δ 7.61 – 7.57 (m, 2H), 7.48 – 7.39 (m, 4H), 7.33 – 7.27 (m, 4H), 7.26 – 7.17 (m, 3H), 7.01 (s, 1H), 6.96 (t, *J* = 7.6 Hz, 1H), 6.91 (d, *J* = 1.6 Hz, 1H), 6.71 (d, *J* = 7.8 Hz, 1H), 6.46 (dd, *J* = 7.4, 1.8 Hz, 1H), 4.94 – 4.84 (m, 2H), 4.27 (d, *J* = 12.4 Hz, 1H), 4.22 (d, *J* = 12.4 Hz, 1H), 3.20 (s, 3H).

<sup>13</sup>C NMR (125 MHz, CDCl<sub>3</sub>) δ 164.8, 160.7, 146.9, 142.9, 141.3, 139.8, 138.7, 137.0, 135.7, 130.6, 129.3, 128.9, 127.8, 127.4, 127.2, 125.1, 124.9, 124.5, 123.8, 122.6, 121.4, 110.2, 109.4, 70.0, 58.5, 43.7.

**HRMS-ESI:** calcd. for C<sub>31</sub>H<sub>26</sub>N<sub>2</sub>O<sub>3</sub>Br [M+H]<sup>+</sup> : 553.1121; found: 553.1133.

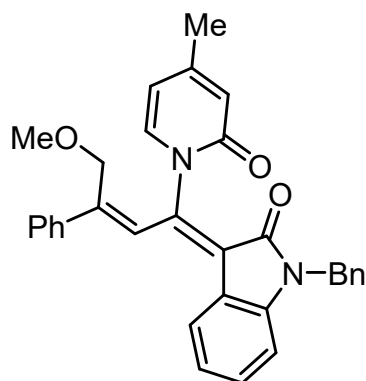

**(Z)-1-benzyl-3-((Z)-4-methoxy-1-(4-methyl-2-oxopyridin-1(2H)-yl)-3-phenylbut-2-en-1-ylidene)indolin-2-one**

**4bd:** 42.9 mg, red brown solid, 44% yield.

<sup>1</sup>H NMR (500 MHz, CDCl<sub>3</sub>) δ 7.63 – 7.59 (m, 2H), 7.47 (d, *J* = 7.7 Hz, 1H), 7.43 – 7.37 (m, 3H), 7.30 (d, *J* = 8.3 Hz, 3H), 7.27 – 7.21 (m, 3H), 7.18 (t, *J* = 7.8 Hz, 1H), 7.06 (s, 1H), 6.95 (t, *J* = 7.7 Hz, 1H), 6.69 (d, *J* = 7.8 Hz, 1H), 6.46 (s, 1H), 6.17 (dd, *J* = 7.1, 0.9 Hz, 1H), 4.94 – 4.85 (m, 2H), 4.30 (d, *J* = 12.5 Hz, 1H), 4.24 (d, *J* = 12.5 Hz, 1H), 3.15 (d, *J* = 0.6 Hz, 3H), 2.25 (s, 3H).

<sup>13</sup>C NMR (125 MHz, CDCl<sub>3</sub>) δ 164.9, 162.0, 152.5, 146.6, 142.8, 142.3, 139.8, 137.6, 135.8, 130.2, 129.1, 128.83, 128.80, 127.7, 127.4, 127.2, 125.5, 125.0, 124.3, 122.4, 121.6, 120.1, 109.2, 108.5, 69.6, 58.2, 43.6, 21.7.

**HRMS-ESI:** calcd. for C<sub>32</sub>H<sub>29</sub>N<sub>2</sub>O<sub>3</sub> [M+H]<sup>+</sup> : 489.2173; found: 489.2176.

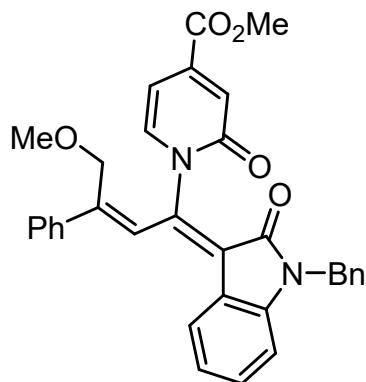

**methyl 1-((Z)-1-((Z)-1-benzyl-2-oxoindolin-3-ylidene)-4-methoxy-3-phenylbut-2-en-1-yl)-2-oxo-1,2-dihydropyridine-4-carboxylate**

**4be:** 96.8 mg, red brown solid, 91% yield.

<sup>1</sup>H NMR (500 MHz, CDCl<sub>3</sub>) δ 7.62 – 7.57 (m, 2H), 7.50 – 7.38 (m, 5H), 7.33 – 7.26 (m, 5H), 7.25 – 7.17 (m, 2H), 7.04 (s, 1H), 6.97 (t, *J* = 7.6 Hz, 1H), 6.81 (d, *J* = 7.1 Hz, 1H), 6.72 (d, *J* = 7.8 Hz, 1H), 4.92 – 4.84 (m, 2H), 4.26 (d, *J* = 12.5 Hz, 1H), 4.22 (d, *J* = 12.4 Hz, 1H), 3.92 (s, 3H), 3.15 (s, 3H).

<sup>13</sup>C NMR (125 MHz, CDCl<sub>3</sub>) δ 165.1, 164.8, 161.9, 147.1, 143.0, 141.6, 141.4, 139.8, 139.3, 135.7, 130.6, 129.3, 128.9, 127.8, 127.5, 127.2, 125.1, 124.8, 124.5, 123.9, 122.6, 121.4, 109.4, 104.2, 69.9, 58.5, 53.0, 43.7.

**HRMS-ESI:** calcd. for C<sub>33</sub>H<sub>29</sub>N<sub>2</sub>O<sub>5</sub> [M+H]<sup>+</sup> : 533.2071; found: 533.2085.

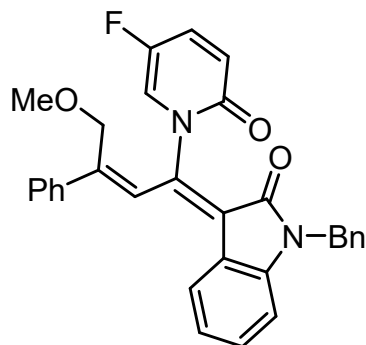

**(Z)-1-benzyl-3-((Z)-1-(5-fluoro-2-oxopyridin-1(2H)-yl)-4-methoxy-3-phenylbut-2-en-1-ylidene)indolin-2-one**

**4bf:** 85.6 mg, red brown solid, 87% yield.

<sup>1</sup>H NMR (500 MHz, CDCl<sub>3</sub>) δ 7.62 – 7.59 (m, 2H), 7.50 – 7.38 (m, 6H), 7.34 – 7.29 (m, 3H), 7.27 – 7.17 (m, 3H), 7.00 (s, 1H), 6.96 (t, *J* = 7.7 Hz, 1H), 6.71 (d, *J* = 7.8 Hz, 1H), 6.62 (dd, *J* = 10.1, 5.2 Hz, 1H), 4.93 – 4.86 (m, 2H), 4.30 (d, *J* = 12.3 Hz, 1H), 4.25 (d, *J* = 12.3 Hz, 1H), 3.20 (s, 3H).

<sup>13</sup>C NMR (125 MHz, CDCl<sub>3</sub>) δ 164.7, 160.4, 147.6 (d, *J* = 231.9 Hz), 147.2, 143.0, 141.1, 139.7, 135.76, 132.84 (d, *J* = 24.6 Hz), 130.6, 129.3, 128.9, 127.8, 127.4, 127.2, 125.0, 124.78, 124.75, 124.2 (d, *J* = 38.1 Hz), 122.5, 122.2 (d, *J* = 7.2 Hz), 121.3, 109.4, 69.9, 58.5, 43.7.

<sup>19</sup>F NMR (376 MHz, CDCl<sub>3</sub>) δ -149.85.

HRMS-ESI: calcd. for C<sub>31</sub>H<sub>26</sub>N<sub>2</sub>O<sub>3</sub>F [M+H]<sup>+</sup> : 493.1922; found: 493.1941.

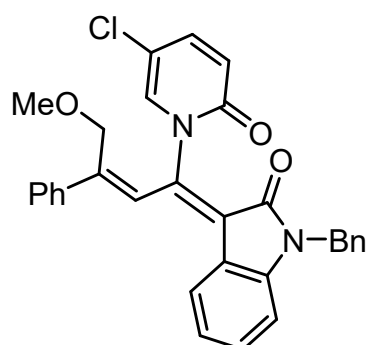

**(Z)-1-benzyl-3-((Z)-1-(5-chloro-2-oxopyridin-1(2H)-yl)-4-methoxy-3-phenylbut-2-en-1-ylidene)indolin-2-one**

**4bg:** 84.3 mg, red brown solid, 83% yield.

<sup>1</sup>H NMR (500 MHz, CDCl<sub>3</sub>) δ 7.61 – 7.58 (m, 2H), 7.49 – 7.42 (m, 4H), 7.42 – 7.37 (m, 3H), 7.32 – 7.28 (m, 3H), 7.25 – 7.17 (m, 2H), 7.00 (s, 1H), 6.96 (td, *J* = 7.7, 0.7 Hz, 1H), 6.70 (d, *J* = 7.8 Hz, 1H), 6.63 – 6.60 (m, 1H), 4.92 (d, *J* = 15.7 Hz, 1H), 4.87 (d, *J* = 15.7 Hz, 1H), 4.28 – 4.22 (m, 2H), 3.21 (s, 3H).

<sup>13</sup>C NMR (125 MHz, CDCl<sub>3</sub>) δ 164.7, 160.6, 147.1, 143.0, 141.6, 141.0, 139.8, 136.4, 135.7, 130.6, 129.3, 128.90, 128.88, 127.7, 127.4, 127.2, 125.1, 124.68, 124.66, 122.5, 122.4, 121.3, 112.3, 109.4, 70.0, 58.6, 43.7.

HRMS-ESI: calcd. for C<sub>31</sub>H<sub>26</sub>N<sub>2</sub>O<sub>3</sub>Cl [M+H]<sup>+</sup> : 509.1626; found: 509.1646.

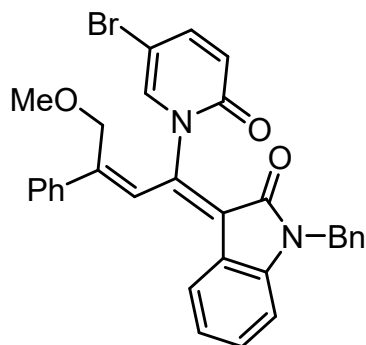

**(Z)-1-benzyl-3-((Z)-1-(5-bromo-2-oxopyridin-1(2H)-yl)-4-methoxy-3-phenylbut-2-en-1-ylidene)indolin-2-one**

**4bh:** 100.6 mg, red brown solid, 91% yield.

<sup>1</sup>H NMR (500 MHz, CDCl<sub>3</sub>) δ 7.61 – 7.58 (m, 2H), 7.52 – 7.51 (m, 1H), 7.47 – 7.39 (m, 5H), 7.32 – 7.28 (m, 3H), 7.27 – 7.17 (m, 3H), 7.00 (s, 1H), 6.95 (t, *J* = 7.7 Hz, 1H), 6.70 (d, *J* = 7.9 Hz, 1H), 6.57 (d, *J* = 9.8 Hz, 1H), 4.92 (d, *J* = 15.7 Hz, 1H), 4.86 (d, *J* = 15.7 Hz, 1H), 4.27 – 4.22 (m, 2H), 3.22 (s, 3H).

<sup>13</sup>C NMR (125 MHz, CDCl<sub>3</sub>) δ 164.7, 160.6, 147.1, 143.6, 143.0, 140.9, 139.8, 138.7, 135.7, 130.6, 129.2, 128.89, 128.86, 127.7, 127.4, 127.1, 125.0, 124.6, 122.7, 122.5, 121.3, 109.3, 97.9, 70.0, 58.7, 43.7.

HRMS-ESI: calcd. for C<sub>31</sub>H<sub>26</sub>N<sub>2</sub>O<sub>3</sub>Br [M+H]<sup>+</sup> : 553.1121; found: 553.1110.

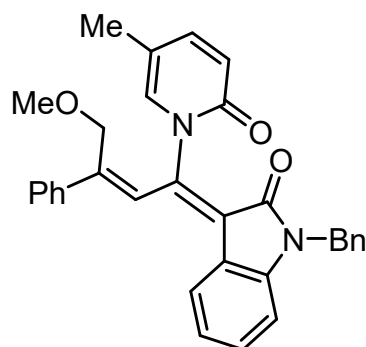

**(Z)-1-benzyl-3-((Z)-4-methoxy-1-(5-methyl-2-oxopyridin-1(2H)-yl)-3-phenylbut-2-en-1-ylidene)indolin-2-one**

**4bi:** 90.8 mg, red brown solid, 93% yield.

<sup>1</sup>H NMR (400 MHz, CDCl<sub>3</sub>) δ 7.64 – 7.59 (m, 2H), 7.51 – 7.41 (m, 3H), 7.41 – 7.35 (m, 2H), 7.33 – 7.28 (m, 3H), 7.26 – 7.14 (m, 3H), 7.12 (s, 1H), 7.05 (s, 1H), 6.95 (t, *J* = 7.7 Hz, 1H), 6.68 (d, *J* = 7.8 Hz, 1H), 6.61 (d, *J* = 9.4 Hz, 1H), 4.89 (s, 2H), 4.29 (d, *J* = 12.3 Hz, 1H), 4.25 (d, *J* = 12.2 Hz, 1H), 3.14 (s, 3H), 2.14 (s, 3H).

<sup>13</sup>C NMR (125 MHz, CDCl<sub>3</sub>) δ 164.8, 161.6, 146.9, 143.5, 142.9, 141.8, 139.8, 135.9, 135.5, 130.3, 129.1, 128.8, 127.6, 127.4, 127.2, 125.4, 125.0, 124.6, 122.4, 121.5, 121.4, 114.9, 109.2, 69.4, 58.4, 43.6, 17.4.

HRMS-ESI: calcd. for C<sub>32</sub>H<sub>29</sub>N<sub>2</sub>O<sub>3</sub> [M+H]<sup>+</sup> : 489.2173; found: 489.2183.

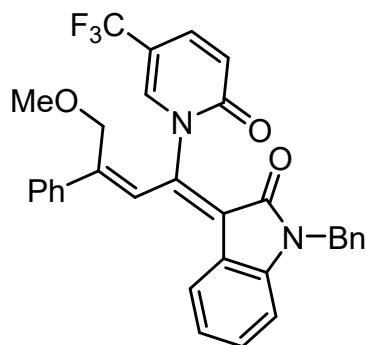

**(Z)-1-benzyl-3-((Z)-4-methoxy-1-(2-oxo-5-(trifluoromethyl)pyridin-1(2H)-yl)-3-phenylbut-2-en-1-ylidene)indolin-2-one**

**4bj**: 105.1 mg, red brown solid, 97% yield.

<sup>1</sup>H NMR (400 MHz, CDCl<sub>3</sub>) δ 7.81 (s, 1H), 7.60 – 7.52 (m, 3H), 7.49 – 7.37 (m, 4H), 7.32 – 7.26 (m, 3H), 7.26 – 7.17 (m, 3H), 7.01 (s, 1H), 6.96 (t, *J* = 7.5 Hz, 1H), 6.70 (t, *J* = 8.3 Hz, 2H), 4.93 (d, *J* = 15.7 Hz, 1H), 4.84 (d, *J* = 15.7 Hz, 1H), 4.21 (s, 2H), 3.19 (s, 3H).

<sup>13</sup>C NMR (125 MHz, CDCl<sub>3</sub>) δ 164.7, 161.4, 147.1, 143.0, 141.1, 139.9, 139.4 (q, *J* = 5.5 Hz), 136.0 (q, *J* = 2.1 Hz), 135.6, 130.8, 129.3, 128.93, 128.88, 127.8, 127.4, 127.1, 125.1, 124.7, 124.4, 123.7 (q, *J* = 273.9 Hz), 122.6, 122.1, 121.2, 109.38 (q, *J* = 34.8 Hz), 109.42, 70.3, 58.6, 43.7.

<sup>19</sup>F NMR (376 MHz, CDCl<sub>3</sub>) δ -62.19.

**HRMS-ESI**: calcd. for C<sub>32</sub>H<sub>26</sub>N<sub>2</sub>O<sub>3</sub>F<sub>3</sub> [M+H]<sup>+</sup> : 543.1890; found: 543.1915.

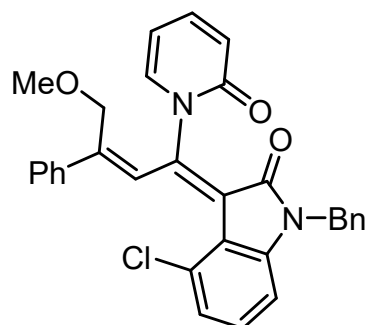

**(Z)-1-benzyl-4-chloro-3-((Z)-4-methoxy-1-(2-oxopyridin-1(2H)-yl)-3-phenylbut-2-en-1-ylidene)indolin-2-one**

**4ca**: 91.4 mg, red brown solid, 90% yield.

<sup>1</sup>H NMR (400 MHz, CDCl<sub>3</sub>) δ 7.63 – 7.58 (m, 2H), 7.48 – 7.43 (m, 1H), 7.38 – 7.27 (m, 6H), 7.25 – 7.22 (m, 3H), 7.12 (t, *J* = 8.0 Hz, 1H), 6.96 (dd, *J* = 8.2, 0.8 Hz, 1H), 6.85 (s, 1H), 6.66 (d, *J* = 9.1 Hz, 1H), 6.60 (dd, *J* = 7.8, 0.8 Hz, 1H), 6.30 (td, *J* = 6.9, 1.2 Hz, 1H), 4.93 (d, *J* = 15.8 Hz, 1H), 4.83 (d, *J* = 15.9 Hz, 1H), 4.25 – 4.14 (m, 2H), 3.12 (s, 3H).

<sup>13</sup>C NMR (100 MHz, CDCl<sub>3</sub>) δ 164.7, 162.3, 147.0, 144.3, 142.9, 140.6, 139.9, 138.9, 135.5, 131.0, 130.3, 129.1, 128.9, 128.6, 128.5, 127.8, 127.3, 127.0, 124.8, 124.7, 122.1, 120.1, 107.4, 105.9, 69.5, 58.5, 43.9.

**HRMS-ESI**: calcd. for C<sub>31</sub>H<sub>26</sub>N<sub>2</sub>O<sub>3</sub>Cl [M+H]<sup>+</sup> : 509.1626; found: 509.1639.

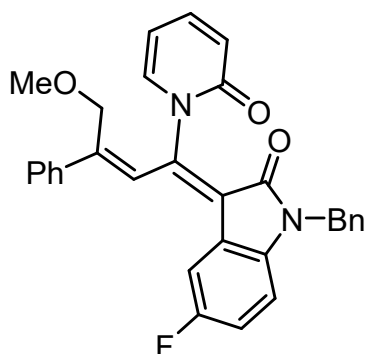

**(Z)-1-benzyl-5-fluoro-3-((Z)-4-methoxy-1-(2-oxopyridin-1(2H)-yl)-3-phenylbut-2-en-1-ylidene)indolin-2-one**

**4cb:** 91.5 mg, red brown solid, 93% yield.

<sup>1</sup>H NMR (500 MHz, CDCl<sub>3</sub>) δ 7.59 (d, *J* = 7.4 Hz, 2H), 7.49 – 7.36 (m, 6H), 7.32 – 7.26 (m, 3H), 7.24 – 7.20 (m, 2H), 6.99 (s, 1H), 6.91 – 6.86 (m, 1H), 6.66 (d, *J* = 9.3 Hz, 1H), 6.62 – 6.58 (m, 1H), 6.32 (t, *J* = 6.6 Hz, 1H), 4.90 – 4.83 (m, 2H), 4.28 (d, *J* = 12.5 Hz, 1H), 4.23 (d, *J* = 12.4 Hz, 1H), 3.16 (s, 3H).

<sup>13</sup>C NMR (125 MHz, CDCl<sub>3</sub>) δ 164.6, 162.0, 158.7 (d, *J* = 239.4 Hz), 147.7, 143.5, 140.7, 139.5, 138.78, 138.77, 138.7, 135.5, 129.3, 128.9, 127.7, 127.4, 127.1, 124.5, 123.84, 123.81, 122.4 (d, *J* = 8.9 Hz), 121.9, 116.5 (d, *J* = 24.0 Hz), 112.4 (d, *J* = 26.3 Hz), 109.7 (d, *J* = 8.2 Hz), 105.8, 69.7, 58.4, 43.7.

<sup>19</sup>F NMR (376 MHz, CDCl<sub>3</sub>) δ -120.47.

**HRMS-ESI:** calcd. for C<sub>31</sub>H<sub>26</sub>N<sub>2</sub>O<sub>3</sub>F [M+H]<sup>+</sup> : 493.1922; found: 493.1938.

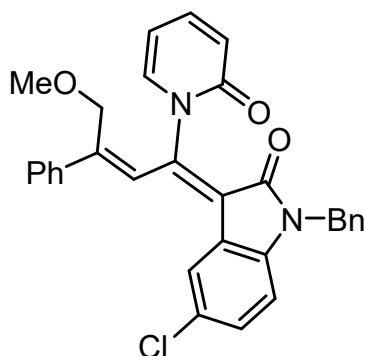

**(Z)-1-benzyl-5-chloro-3-((Z)-4-methoxy-1-(2-oxopyridin-1(2H)-yl)-3-phenylbut-2-en-1-ylidene)indolin-2-one**

**4cc:** 99.6 mg, red brown solid, 98% yield.

<sup>1</sup>H NMR (400 MHz, CDCl<sub>3</sub>) δ 7.62 – 7.57 (m, 2H), 7.47 – 7.34 (m, 6H), 7.31 – 7.27 (m, 2H), 7.26 – 7.21 (m, 3H), 7.15 (dd, *J* = 8.4, 1.8 Hz, 1H), 6.99 (s, 1H), 6.67 – 6.59 (m, 2H), 6.31 (td, *J* = 6.8, 1.2 Hz, 1H), 4.87 (s, 2H), 4.28 (d, *J* = 12.4 Hz, 1H), 4.23 (d, *J* = 12.4 Hz, 1H), 3.16 (d, *J* = 1.2 Hz, 3H).

<sup>13</sup>C NMR (100 MHz, CDCl<sub>3</sub>) δ 164.4, 162.0, 148.0, 143.6, 141.2, 140.7, 139.5, 138.5, 135.4, 129.9, 129.3, 128.9, 127.8, 127.7, 127.4, 127.2, 124.9, 124.5, 123.4, 122.9, 122.0, 110.1, 105.8, 69.8, 58.5, 43.7.

**HRMS-ESI:** calcd. for C<sub>31</sub>H<sub>26</sub>N<sub>2</sub>O<sub>3</sub>Cl [M+H]<sup>+</sup> : 509.1626; found: 509.1622.

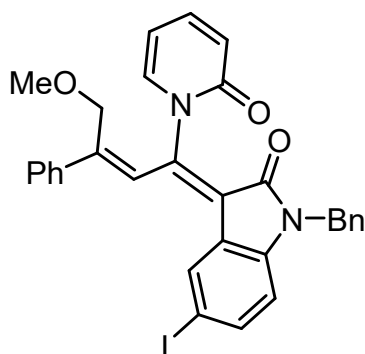

**(Z)-1-benzyl-5-iodo-3-((Z)-4-methoxy-1-(2-oxopyridin-1(2H)-yl)-3-phenylbut-2-en-1-ylidene)indolin-2-one**

**4cd:** 98.4 mg, red brown solid, 82% yield.

<sup>1</sup>H NMR (500 MHz, CDCl<sub>3</sub>) δ 7.82 (d, *J* = 1.5 Hz, 1H), 7.61 – 7.58 (m, 2H), 7.52 – 7.37 (m, 6H), 7.34 – 7.28 (m, 3H), 7.25 – 7.22 (m, 2H), 6.97 (s, 1H), 6.66 (d, *J* = 9.3 Hz, 1H), 6.48 (d, *J* = 8.3 Hz, 1H), 6.32 (td, *J* = 6.8, 1.2 Hz, 1H), 4.91 – 4.82 (m, 2H), 4.28 (d, *J* = 12.5 Hz, 1H), 4.23 (d, *J* = 12.4 Hz, 1H), 3.16 (s, 3H).

<sup>13</sup>C NMR (125 MHz, CDCl<sub>3</sub>) δ 164.2, 162.0, 148.0, 143.4, 142.3, 140.7, 139.6, 138.7, 138.4, 135.4, 133.5, 129.3, 129.0, 128.9, 127.9, 127.4, 127.1, 124.6, 123.8, 123.2, 122.0, 111.3, 106.0, 84.7, 69.9, 58.6, 43.7.

**HRMS-ESI:** calcd. for C<sub>31</sub>H<sub>26</sub>N<sub>2</sub>O<sub>3</sub>I [M+H]<sup>+</sup> : 601.0983; found: 601.1001.

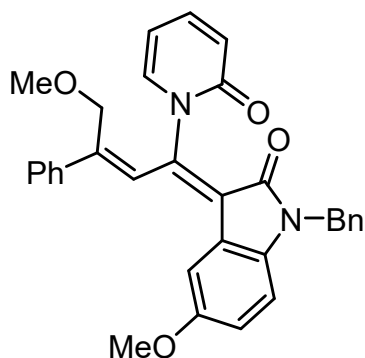

**(Z)-1-benzyl-5-methoxy-3-((Z)-4-methoxy-1-(2-oxopyridin-1(2H)-yl)-3-phenylbut-2-en-1-ylidene)indolin-2-one**

**4ce:** 93.7 mg, red brown solid, 93% yield.

<sup>1</sup>H NMR (500 MHz, CDCl<sub>3</sub>) δ 7.60 (d, *J* = 7.0 Hz, 2H), 7.47 – 7.34 (m, 6H), 7.31 – 7.27 (m, 2H), 7.25 – 7.21 (m, 2H), 7.13 (s, 1H), 7.03 (s, 1H), 6.75 – 6.71 (m, 1H), 6.67 (d, *J* = 9.2 Hz, 1H), 6.58 (d, *J* = 8.5 Hz, 1H), 6.32 (t, *J* = 6.7 Hz, 1H), 4.86 (s, 2H), 4.31 (d, *J* = 12.4 Hz, 1H), 4.26 (d, *J* = 12.3 Hz, 1H), 3.65 (s, 3H), 3.16 (s, 3H).

<sup>13</sup>C NMR (125 MHz, CDCl<sub>3</sub>) δ 164.7, 162.2, 155.5, 146.9, 142.4, 140.7, 139.7, 138.8, 136.8, 135.9, 129.1, 128.84, 128.82, 127.7, 127.4, 127.1, 125.1, 124.8, 122.3, 122.0, 115.2, 112.0, 109.6, 105.9, 69.7, 58.4, 55.7, 43.7.

**HRMS-ESI:** calcd. for C<sub>32</sub>H<sub>29</sub>N<sub>2</sub>O<sub>4</sub> [M+H]<sup>+</sup> : 505.2122; found: 505.2120.



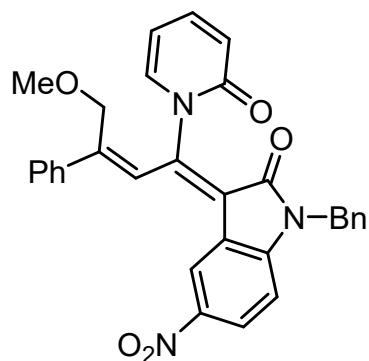

**(Z)-1-benzyl-3-((Z)-4-methoxy-1-(2-oxopyridin-1(2H)-yl)-3-phenylbut-2-en-1-ylidene)-5-nitroindolin-2-one**

**4cf:** 93.6 mg, yellow solid, 90% yield, 90:10 *dr*.

**<sup>1</sup>H NMR** (500 MHz, CDCl<sub>3</sub>) δ 8.48 (s, 1H), 8.18 – 8.14 (m, 1H), 7.65 – 7.62 (m, 2H), 7.51 – 7.40 (m, 5H), 7.36 – 7.27 (m, 5H), 7.07 (s, 1H), 6.80 (dd, *J* = 8.7, 1.2 Hz, 1H), 6.68 (d, *J* = 9.3 Hz, 1H), 6.35 (t, *J* = 6.8 Hz, 1H), 4.99 – 4.92 (m, 2H), 4.30 (d, *J* = 12.4 Hz, 1H), 4.24 (d, *J* = 12.3 Hz, 1H), 3.17 (d, *J* = 1.5 Hz, 3H).

**<sup>13</sup>C NMR** (125 MHz, CDCl<sub>3</sub>) δ 164.8, 161.9, 149.7, 147.4, 145.3, 143.2, 140.9, 139.5, 138.1, 134.8, 129.7, 129.14, 129.05, 128.2, 127.5, 127.1, 126.4, 124.2, 122.14, 122.07, 122.0, 120.3, 108.8, 106.2, 70.1, 58.7, 44.1.

**HRMS-ESI:** calcd. for C<sub>31</sub>H<sub>26</sub>N<sub>3</sub>O<sub>5</sub> [M+H]<sup>+</sup> : 520.1867; found: 520.1878.

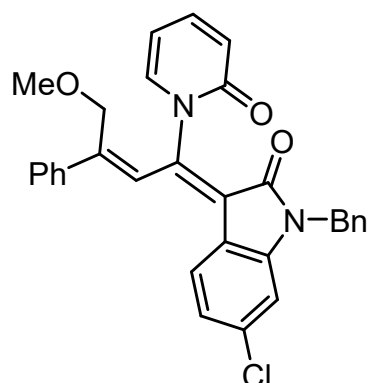

**(Z)-1-benzyl-6-chloro-3-((Z)-4-methoxy-1-(2-oxopyridin-1(2H)-yl)-3-phenylbut-2-en-1-ylidene)indolin-2-one**

**4cg:** 96.5 mg, red brown solid, 95% yield.

**<sup>1</sup>H NMR** (500 MHz, CDCl<sub>3</sub>) δ 7.62 – 7.58 (m, 2H), 7.48 – 7.34 (m, 7H), 7.33 – 7.29 (m, 2H), 7.28 – 7.26 (m, 1H), 7.25 – 7.24 (m, 1H), 6.99 (s, 1H), 6.94 (dd, *J* = 8.2, 1.8 Hz, 1H), 6.70 (d, *J* = 1.7 Hz, 1H), 6.66 (d, *J* = 9.2 Hz, 1H), 6.32 (td, *J* = 6.8, 1.2 Hz, 1H), 4.86 (s, 2H), 4.27 (d, *J* = 12.5 Hz, 1H), 4.22 (d, *J* = 12.4 Hz, 1H), 3.15 (s, 3H).

**<sup>13</sup>C NMR** (125 MHz, CDCl<sub>3</sub>) δ 164.8, 162.1, 147.4, 143.8, 142.7, 140.7, 139.7, 138.6, 136.2, 135.3, 129.3, 129.0, 128.9, 127.9, 127.4, 127.2, 125.7, 124.9, 123.4, 122.4, 122.0, 120.0, 109.8, 105.9, 69.7, 58.4, 43.7.

**HRMS-ESI:** calcd. for C<sub>31</sub>H<sub>26</sub>N<sub>2</sub>O<sub>3</sub>Cl [M+H]<sup>+</sup> : 509.1626; found: 509.1639.

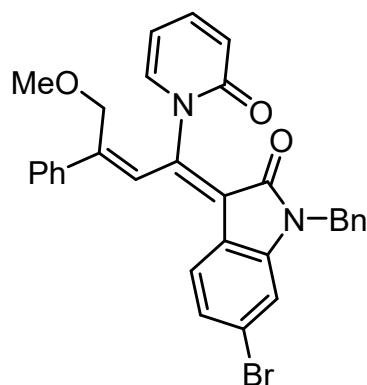

**(Z)-1-benzyl-6-bromo-3-((Z)-4-methoxy-1-(2-oxopyridin-1(2H)-yl)-3-phenylbut-2-en-1-ylidene)indolin-2-one**

**4ch:** 102.7 mg, red brown solid, 93% yield.

**<sup>1</sup>H NMR** (500 MHz, CDCl<sub>3</sub>) δ 7.61 – 7.57 (m, 2H), 7.47 – 7.38 (m, 4H), 7.36 – 7.28 (m, 4H), 7.27 – 7.22 (m, 3H), 7.11 – 7.05 (m, 1H), 7.00 – 6.96 (m, 1H), 6.86 (s, 1H), 6.68 – 6.62 (m, 1H), 6.34 – 6.28 (m, 1H), 4.85 (s, 2H), 4.30 – 4.18 (m, 2H), 3.15 (s, 3H).

**<sup>13</sup>C NMR** (125 MHz, CDCl<sub>3</sub>) δ 164.5, 161.9, 147.3, 143.7, 142.7, 140.7, 139.6, 138.5, 135.2, 129.2, 128.9, 128.8, 127.8, 127.3, 127.1, 125.8, 125.3, 124.8, 124.2, 123.4, 121.9, 120.4, 112.4, 105.8, 69.6, 58.4, 43.6.

**HRMS-ESI:** calcd. for C<sub>31</sub>H<sub>26</sub>N<sub>2</sub>O<sub>3</sub>Br [M+H]<sup>+</sup> : 553.1121; found: 553.1133.

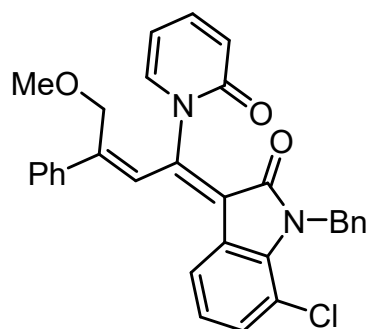

**(Z)-1-benzyl-7-chloro-3-((Z)-4-methoxy-1-(2-oxopyridin-1(2H)-yl)-3-phenylbut-2-en-1-ylidene)indolin-2-one**

**4ci:** 98.6 mg, red brown solid, 97% yield.

**<sup>1</sup>H NMR** (400 MHz, CDCl<sub>3</sub>) δ 7.63 – 7.58 (m, 2H), 7.46 – 7.38 (m, 5H), 7.35 – 7.32 (m, 1H), 7.29 – 7.26 (m, 1H), 7.25 – 7.23 (m, 1H), 7.22 – 7.14 (m, 4H), 7.02 (s, 1H), 6.89 (t, *J* = 7.9 Hz, 1H), 6.62 (d, *J* = 9.3 Hz, 1H), 6.28 (td, *J* = 6.8, 1.1 Hz, 1H), 5.39 – 5.29 (m, 2H), 4.27 (d, *J* = 12.6 Hz, 1H), 4.22 (d, *J* = 12.5 Hz, 1H), 3.15 (s, 3H).

**<sup>13</sup>C NMR** (100 MHz, CDCl<sub>3</sub>) δ 165.2, 161.9, 147.4, 143.4, 140.6, 139.5, 138.7, 138.6, 137.5, 132.5, 129.2, 128.8, 128.5, 127.2, 127.1, 126.4, 125.1, 124.4, 123.5, 123.1, 122.9, 121.9, 115.7, 105.8, 69.7, 58.3, 44.7.

**HRMS-ESI:** calcd. for C<sub>31</sub>H<sub>26</sub>N<sub>2</sub>O<sub>3</sub>Cl [M+H]<sup>+</sup> : 509.1626; found: 509.1628.

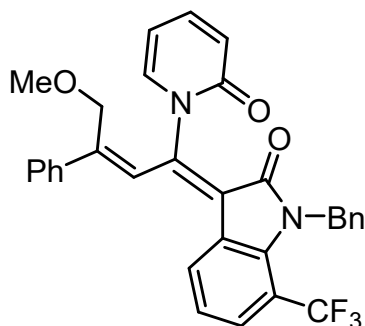

**(Z)-1-benzyl-3-((Z)-4-methoxy-1-(2-oxopyridin-1(2H)-yl)-3-phenylbut-2-en-1-ylidene)-7-(trifluoromethyl)indolin-2-one**

**4cj:** 75.9 mg, red brown solid, 70% yield.

**<sup>1</sup>H NMR** (400 MHz, CDCl<sub>3</sub>) δ 7.78 (d, *J* = 7.5 Hz, 1H), 7.63 – 7.59 (m, 2H), 7.56 (d, *J* = 7.9 Hz, 1H), 7.47 – 7.38 (m, 4H), 7.35 – 7.31 (m, 1H), 7.25 – 7.14 (m, 3H), 7.11 – 7.02 (m, 4H), 6.61 (d, *J* = 9.3 Hz, 1H), 6.28 (td, *J* = 6.8, 1.2 Hz, 1H), 5.25 – 5.14 (m, 2H), 4.28 (d, *J* = 13.0 Hz, 1H), 4.23 (d, *J* = 12.6 Hz, 1H), 3.17 (s, 3H).

**<sup>13</sup>C NMR** (100 MHz, CDCl<sub>3</sub>) δ 165.7, 161.9, 147.9, 143.9, 140.8, 140.6, 139.5, 138.6, 136.3, 129.5, 129.0, 128.5, 128.2, 128.1 (q, *J* = 6.3 Hz), 127.3, 126.8, 125.8 (q, *J* = 288.13 Hz), 125.6, 125.0, 124.7, 124.6 (q, *J* = 31.9 Hz), 122.0, 121.8, 121.7, 106.0, 69.9, 58.5, 45.4.

**<sup>19</sup>F NMR** (376 MHz, CDCl<sub>3</sub>) δ -55.06.

**HRMS-ESI:** calcd. for C<sub>32</sub>H<sub>26</sub>N<sub>2</sub>O<sub>3</sub>F<sub>3</sub> [M+H]<sup>+</sup> : 543.1890; found: 543.1912.

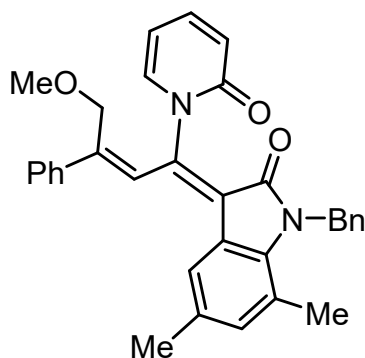

**(Z)-1-benzyl-3-((Z)-4-methoxy-1-(2-oxopyridin-1(2H)-yl)-3-phenylbut-2-en-1-ylidene)-5,7-dimethylindolin-2-one**

**4ck:** 93.4 mg, red brown solid, 93% yield.

**<sup>1</sup>H NMR** (500 MHz, CDCl<sub>3</sub>) δ 7.62 (d, *J* = 7.9 Hz, 2H), 7.45 – 7.34 (m, 6H), 7.29 – 7.27 (m, 1H), 7.23 – 7.18 (m, 2H), 7.10 (d, *J* = 7.6 Hz, 2H), 7.06 (s, 1H), 6.80 (s, 1H), 6.63 (d, *J* = 9.2 Hz, 1H), 6.28 (t, *J* = 6.7 Hz, 1H), 5.15 (s, 2H), 4.30 (d, *J* = 12.4 Hz, 1H), 4.25 (d, *J* = 12.4 Hz, 1H), 3.16 (s, 3H), 2.21 (d, *J* = 3.7 Hz, 6H).

**<sup>13</sup>C NMR** (125 MHz, CDCl<sub>3</sub>) δ 165.8, 162.2, 146.4, 141.5, 140.6, 139.9, 138.9, 138.8, 137.8, 135.1, 131.7, 129.0, 128.9, 128.8, 127.2, 125.8, 125.6, 124.5, 123.9, 122.4, 122.0, 119.8, 105.9, 69.8, 58.4, 44.9, 21.1, 18.9.

**HRMS-ESI:** calcd. for C<sub>33</sub>H<sub>31</sub>N<sub>2</sub>O<sub>3</sub> [M+H]<sup>+</sup> : 503.2329; found: 503.2319.

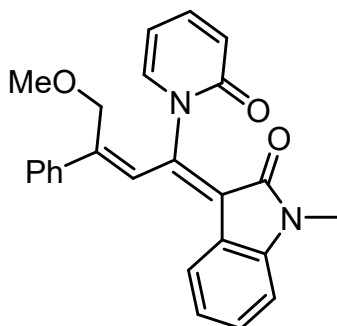

**(Z)-3-((Z)-4-methoxy-1-(2-oxopyridin-1(2H)-yl)-3-phenylbut-2-en-1-ylidene)-1-methylindolin-2-one**

**4cl:** 76.4 mg, red brown solid, 96% yield.

**<sup>1</sup>H NMR** (500 MHz, CDCl<sub>3</sub>) δ 7.62 – 7.58 (m, 2H), 7.50 – 7.38 (m, 5H), 7.34 – 7.30 (m, 2H), 7.03 (s, 1H), 7.00 (t, *J* = 7.6 Hz, 1H), 6.81 (d, *J* = 7.8 Hz, 1H), 6.66 (d, *J* = 9.3 Hz, 1H), 6.31 (t, *J* = 6.4 Hz, 1H), 4.29 (d, *J* = 12.4 Hz, 1H), 4.24 (d, *J* = 12.4 Hz, 1H), 3.18 (s, 3H), 3.14 (s, 3H).

**<sup>13</sup>C NMR** (125 MHz, CDCl<sub>3</sub>) δ 164.8, 162.2, 146.8, 143.7, 141.8, 140.7, 139.9, 138.6, 130.5, 129.1, 128.8, 127.2, 125.1, 124.9, 124.7, 122.4, 121.9, 121.3, 108.3, 105.9, 69.6, 58.4, 26.0.

**HRMS-ESI:** calcd. for C<sub>25</sub>H<sub>23</sub>N<sub>2</sub>O<sub>3</sub> [M+H]<sup>+</sup> : 399.1703; found: 399.1710.

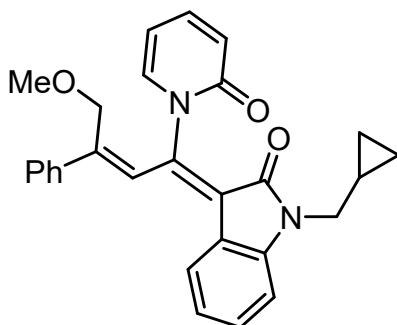

**(Z)-1-(cyclopropylmethyl)-3-((Z)-4-methoxy-1-(2-oxopyridin-1(2H)-yl)-3-phenylbut-2-en-1-ylidene)indolin-2-one**

**4cm:** 79.7 mg, red brown solid, 91% yield.

**<sup>1</sup>H NMR** (400 MHz, CDCl<sub>3</sub>) δ 7.60 (dd, *J* = 8.0, 1.3 Hz, 2H), 7.50 – 7.43 (m, 2H), 7.42 – 7.39 (m, 2H), 7.37 – 7.26 (m, 3H), 7.05 (s, 1H), 6.98 (t, *J* = 7.6 Hz, 1H), 6.89 (d, *J* = 7.8 Hz, 1H), 6.64 (d, *J* = 9.2 Hz, 1H), 6.29 (td, *J* = 6.8, 1.1 Hz, 1H), 4.28 (d, *J* = 12.5 Hz, 1H), 4.22 (d, *J* = 12.4 Hz, 1H), 3.56 (d, *J* = 6.9 Hz, 2H), 3.14 (s, 3H), 1.18 – 1.09 (m, 1H), 0.51 – 0.46 (m, 2H), 0.36 – 0.30 (m, 2H).

**<sup>13</sup>C NMR** (100 MHz, CDCl<sub>3</sub>) δ 164.6, 162.0, 146.4, 143.4, 141.9, 140.6, 139.9, 138.9, 130.3, 129.0, 128.8, 127.2, 125.3, 125.1, 124.6, 122.1, 121.9, 121.5, 108.6, 105.7, 69.6, 58.3, 44.2, 9.7, 4.1, 4.0.

**HRMS-ESI:** calcd. for C<sub>28</sub>H<sub>27</sub>N<sub>2</sub>O<sub>3</sub> [M+H]<sup>+</sup> : 439.2016; found: 439.2022.

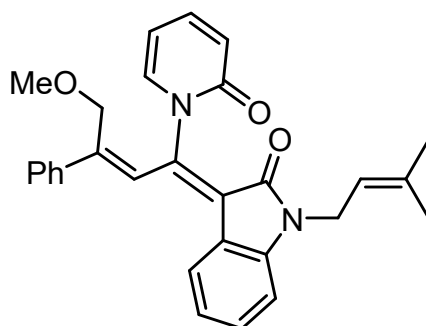

**(Z)-3-((Z)-4-methoxy-1-(2H)-pyridin-1-yl)-3-phenylbut-2-en-1-ylidene)-1-(3-methylbut-2-en-1-yl)indolin-2-one**

**4cn:** 75.9 mg, red brown solid, 84% yield.

**<sup>1</sup>H NMR** (500 MHz, CDCl<sub>3</sub>) δ 7.61 – 7.58 (m, 2H), 7.49 – 7.42 (m, 3H), 7.42 – 7.37 (m, 2H), 7.34 (dd, *J* = 6.9, 1.7 Hz, 1H), 7.29 – 7.26 (m, 1H), 7.03 (s, 1H), 6.97 (t, *J* = 7.7 Hz, 1H), 6.77 (d, *J* = 7.8 Hz, 1H), 6.65 (d, *J* = 9.3 Hz, 1H), 6.33 – 6.28 (m, 1H), 5.12 (t, *J* = 6.5 Hz, 1H), 4.30 – 4.21 (m, 4H), 3.14 (s, 3H), 1.78 (s, 3H), 1.70 (s, 3H).

**<sup>13</sup>C NMR** (125 MHz, CDCl<sub>3</sub>) δ 164.3, 162.1, 146.5, 143.2, 141.9, 140.7, 139.9, 138.9, 136.4, 130.4, 129.1, 128.8, 127.2, 125.3, 125.0, 124.8, 122.2, 121.9, 121.5, 118.6, 108.9, 105.8, 69.6, 58.3, 37.9, 25.7, 18.3.

**HRMS-ESI:** calcd. for C<sub>29</sub>H<sub>29</sub>N<sub>2</sub>O<sub>3</sub> [M+H]<sup>+</sup> : 453.2173; found: 453.2176.

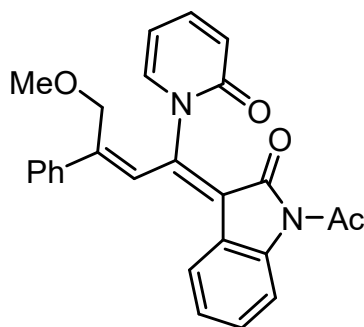

**(Z)-1-acetyl-3-((Z)-4-methoxy-1-(2H)-pyridin-1-yl)-3-phenylbut-2-en-1-ylidene)indolin-2-one**

**4co:** 80.9 mg, yellow solid, 95% yield.

**<sup>1</sup>H NMR** (500 MHz, CDCl<sub>3</sub>) δ 8.31 (d, *J* = 8.2 Hz, 1H), 7.61 – 7.56 (m, 3H), 7.49 – 7.43 (m, 2H), 7.43 – 7.36 (m, 3H), 7.32 (d, *J* = 6.9 Hz, 1H), 7.18 (t, *J* = 7.7 Hz, 1H), 6.99 (s, 1H), 6.66 (d, *J* = 9.3 Hz, 1H), 6.32 (t, *J* = 6.7 Hz, 1H), 4.26 (d, *J* = 12.5 Hz, 1H), 4.23 (d, *J* = 12.5 Hz, 1H), 3.16 (s, 3H), 2.63 (s, 3H).

**<sup>13</sup>C NMR** (125 MHz, CDCl<sub>3</sub>) δ 170.9, 164.9, 162.0, 148.1, 142.8, 140.8, 139.8, 139.5, 138.3, 130.8, 129.4, 128.9, 127.2, 125.13, 125.11, 124.4, 123.3, 122.3, 122.0, 116.7, 106.1, 69.7, 58.5, 27.2.

**HRMS-ESI:** calcd. for C<sub>26</sub>H<sub>22</sub>N<sub>2</sub>O<sub>4</sub> [M+H]<sup>+</sup> : 427.1652; found: 427.1666.

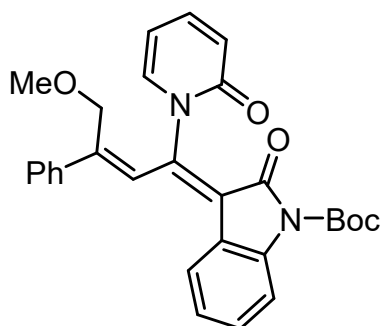

**tert-butyl(*Z*)-3-((*Z*)-4-methoxy-1-(2*H*)-oxopyridin-1(2*H*)-yl)-3-phenylbut-2-en-1-ylidene)-2-oxoindoline-1-carboxylate**

**4cp:** 80.3 mg, yellow solid, 83% yield.

**<sup>1</sup>H NMR** (500 MHz, CDCl<sub>3</sub>) δ 7.83 (d, *J* = 8.2 Hz, 1H), 7.61 – 7.58 (m, 2H), 7.55 (d, *J* = 7.7 Hz, 1H), 7.44 – 7.42 (m, 2H), 7.42 – 7.38 (m, 2H), 7.37 – 7.33 (m, 1H), 7.31 – 7.29 (m, 1H), 7.11 (t, *J* = 7.6 Hz, 1H), 6.98 (s, 1H), 6.62 (d, *J* = 9.2 Hz, 1H), 6.29 (t, *J* = 6.2 Hz, 1H), 4.25 (d, *J* = 12.4 Hz, 1H), 4.21 (d, *J* = 12.5 Hz, 1H), 3.14 (s, 3H), 1.61 (s, 9H).

**<sup>13</sup>C NMR** (100 MHz, CDCl<sub>3</sub>) δ 162.6, 162.0, 149.0, 147.2, 142.7, 140.7, 139.61, 139.55, 138.6, 130.6, 129.2, 128.8, 127.2, 125.3, 124.6, 124.3, 123.2, 122.0, 121.8, 115.1, 106.2, 84.6, 69.7, 58.4, 28.2.

**HRMS-ESI:** calcd. for C<sub>29</sub>H<sub>29</sub>N<sub>2</sub>O<sub>5</sub> [M+H]<sup>+</sup> : 485.2071; found: 485.2061.

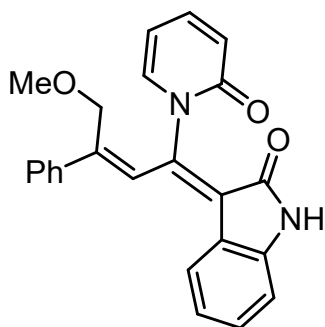

**(*Z*)-3-((*Z*)-4-methoxy-1-(2*H*)-oxopyridin-1(2*H*)-yl)-3-phenylbut-2-en-1-ylideneindolin-2-one**

**4cq:** 73.7 mg, red brown solid, 96% yield.

**<sup>1</sup>H NMR** (500 MHz, CDCl<sub>3</sub>) δ 8.37 (s, 1H), 7.61 – 7.57 (m, 2H), 7.46 – 7.40 (m, 3H), 7.40 – 7.36 (m, 2H), 7.32 (dd, *J* = 6.9, 1.7 Hz, 1H), 7.19 (t, *J* = 7.5 Hz, 1H), 7.00 (s, 1H), 6.92 (t, *J* = 7.6 Hz, 1H), 6.78 (d, *J* = 7.7 Hz, 1H), 6.65 (d, *J* = 9.3 Hz, 1H), 6.32 – 6.27 (m, 1H), 4.26 (d, *J* = 12.4 Hz, 1H), 4.21 (d, *J* = 12.3 Hz, 1H), 3.13 (s, 3H).

**<sup>13</sup>C NMR** (125 MHz, CDCl<sub>3</sub>) δ 166.2, 162.3, 146.6, 141.6, 141.5, 140.8, 139.9, 138.8, 130.4, 129.1, 128.8, 127.2, 125.23, 125.15, 125.0, 122.1, 121.9, 121.8, 110.2, 106.1, 69.5, 58.3.

**HRMS-ESI:** calcd. for C<sub>24</sub>H<sub>21</sub>N<sub>2</sub>O<sub>3</sub> [M+H]<sup>+</sup> : 385.1547; found: 385.1539.

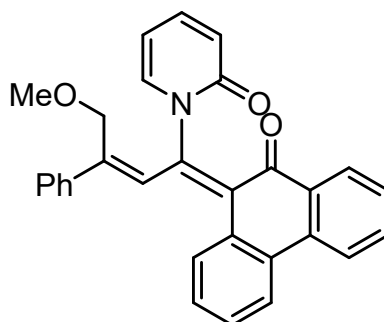

**1-((Z)-4-methoxy-1-((Z)-10-oxophenanthren-9(10H)-ylidene)-3-phenylbut-2-en-1-yl)pyridin-2(1H)-one**

**4cr:** 55.2 mg, red brown solid, 62% yield.

**<sup>1</sup>H NMR** (500 MHz, CDCl<sub>3</sub>) δ 7.99 – 7.94 (m, 3H), 7.83 (d, *J* = 7.8 Hz, 1H), 7.64 (t, *J* = 7.6 Hz, 1H), 7.49 – 7.44 (m, 3H), 7.41 – 7.35 (m, 3H), 7.33 – 7.27 (m, 4H), 6.80 (s, 1H), 6.62 (d, *J* = 9.1 Hz, 1H), 6.30 (t, *J* = 6.7 Hz, 1H), 4.11 (d, *J* = 12.1 Hz, 1H), 4.06 (d, *J* = 12.0 Hz, 1H), 3.16 (s, 3H).

**<sup>13</sup>C NMR** (125 MHz, CDCl<sub>3</sub>) δ 186.2, 162.3, 145.4, 140.9, 140.8, 140.7, 136.6, 134.8, 134.2, 131.9, 131.43, 131.39, 131.2, 130.0, 128.60, 128.56, 127.82, 127.82, 127.5, 127.0, 124.4, 123.1, 121.5, 104.3, 69.5, 58.5.

**HRMS-ESI:** calcd. for C<sub>30</sub>H<sub>24</sub>NO<sub>3</sub> [M+H]<sup>+</sup> : 446.1751; found: 446.1752.

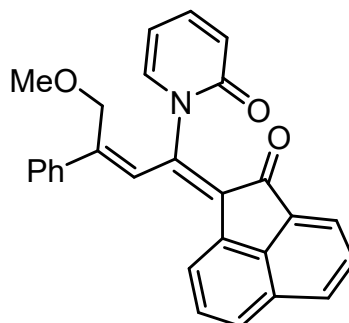

**1-((Z)-4-methoxy-1-((Z)-2-oxoacenaphthylen-1(2H)-ylidene)-3-phenylbut-2-en-1-yl)pyridin-2(1H)-one**

**4cs:** 51.1 mg, yellow solid, 61% yield.

**<sup>1</sup>H NMR** (500 MHz, CDCl<sub>3</sub>) δ 8.08 (d, *J* = 8.0 Hz, 1H), 7.94 – 7.89 (m, 2H), 7.76 – 7.68 (m, 2H), 7.66 – 7.59 (m, 3H), 7.55 – 7.46 (m, 2H), 7.45 – 7.39 (m, 3H), 7.16 (s, 1H), 6.70 (d, *J* = 9.2 Hz, 1H), 6.37 – 6.31 (m, 1H), 4.33 (d, *J* = 12.3 Hz, 1H), 4.28 (d, *J* = 12.3 Hz, 1H), 3.14 (s, 3H).

**<sup>13</sup>C NMR** (125 MHz, CDCl<sub>3</sub>) δ 189.5, 162.3, 146.7, 140.7, 140.1, 140.0, 139.8, 138.8, 133.0, 132.9, 131.5, 130.9, 130.5, 129.1, 128.8, 128.6, 128.3, 127.2, 126.6, 125.3, 122.4, 122.0, 105.8, 69.7, 58.4.

**HRMS-ESI:** calcd. for C<sub>28</sub>H<sub>22</sub>NO<sub>3</sub> [M+H]<sup>+</sup> : 420.1594; found: 420.1595.

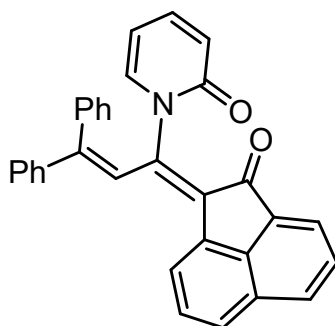

**(Z)-1-(1-(2-oxoacenaphthylen-1(2H)-ylidene)-3,3-diphenylallyl)pyridin-2(1H)-one**

**4ct:** 57.7 mg, yellow solid, 64% yield.

**<sup>1</sup>H NMR** (500 MHz, CDCl<sub>3</sub>) δ 8.08 (d, *J* = 8.1 Hz, 1H), 7.92 – 7.86 (m, 3H), 7.71 – 7.63 (m, 2H), 7.45 (s, 1H), 7.41 – 7.39 (m, 2H), 7.38 – 7.36 (m, 2H), 7.26 – 7.18 (m, 4H), 7.12 – 7.07 (m, 3H), 6.66 (d, *J* = 6.8 Hz, 1H), 6.33 (d, *J* = 9.3 Hz, 1H), 5.68 (t, *J* = 6.7 Hz, 1H).

**<sup>13</sup>C NMR** (125 MHz, CDCl<sub>3</sub>) δ 189.3, 161.6, 151.3, 141.8, 141.5, 140.0, 139.5, 139.1, 138.9, 133.8, 133.2, 131.4, 130.6, 130.5, 129.6, 129.2, 128.7, 128.6, 128.5, 128.4, 128.3, 126.4, 123.4, 122.2, 121.9, 121.4, 104.8.

**HRMS-ESI:** calcd. for C<sub>32</sub>H<sub>22</sub>NO<sub>2</sub> [M+H]<sup>+</sup> : 452.1645; found: 452.1633.

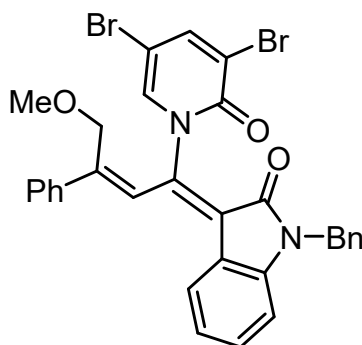

**(Z)-1-benzyl-3-((Z)-1-(3,5-dibromo-2-oxopyridin-1(2H)-yl)-4-methoxy-3-phenylbut-2-en-1-ylidene)indolin-2-one**

**6a:** 61.7 mg, red brown solid, 98% yield.

**<sup>1</sup>H NMR** (400 MHz, CDCl<sub>3</sub>) δ 7.88 (d, *J* = 2.3 Hz, 1H), 7.61 – 7.57 (m, 2H), 7.55 – 7.53 (m, 1H), 7.49 – 7.45 (m, 1H), 7.43 – 7.39 (m, 3H), 7.33 – 7.28 (m, 3H), 7.26 – 7.18 (m, 3H), 6.98 – 6.93 (m, 2H), 6.71 (d, *J* = 7.8 Hz, 1H), 4.88 (s, 2H), 4.24 (s, 2H), 3.21 (s, 3H).

**<sup>13</sup>C NMR** (100 MHz, CDCl<sub>3</sub>) δ 164.6, 156.9, 147.2, 144.7, 143.1, 140.8, 139.7, 138.3, 135.6, 130.8, 129.3, 128.9, 127.8, 127.4, 127.2, 125.1, 124.6, 124.10, 124.06, 122.6, 121.0, 117.6, 109.4, 96.7, 70.3, 58.7, 43.8.

**HRMS-ESI:** calcd. for C<sub>31</sub>H<sub>25</sub>N<sub>2</sub>O<sub>3</sub>Br<sub>2</sub> [M+H]<sup>+</sup> : 631.0226; found: 631.0222.



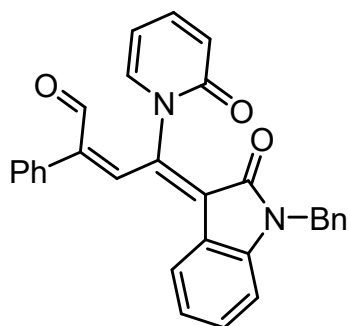

**(Z)-4-((Z)-1-benzyl-2-oxoindolin-3-ylidene)-4-(2-oxopyridin-1(2H)-yl)-2-phenylbut-2-enal**

**6b:** 41.2 mg, red brown solid, 90% yield.

<sup>1</sup>H NMR (500 MHz, CDCl<sub>3</sub>) δ 9.95 (s, 1H), 7.87 – 7.81 (m, 1H), 7.69 – 7.62 (m, 1H), 7.36 – 7.27 (m, 4H), 7.26 – 7.20 (m, 5H), 7.14 – 7.06 (m, 2H), 7.05 – 7.00 (m, 2H), 6.79 – 6.75 (m, 1H), 6.72 – 6.66 (m, 1H), 6.35 – 6.28 (m, 1H), 5.79 – 5.70 (m, 1H), 4.90 (d, *J* = 15.7 Hz, 1H), 4.81 (d, *J* = 15.7 Hz, 1H).

<sup>13</sup>C NMR (125 MHz, CDCl<sub>3</sub>) δ 192.7, 164.1, 161.4, 146.2, 143.6, 140.8, 140.4, 138.8, 135.4, 131.8, 131.8, 129.0, 128.93, 128.91, 128.4, 127.93, 127.88, 127.6, 127.5, 125.5, 123.0, 121.4, 121.1, 109.8, 105.7, 43.7.

**HRMS-ESI:** calcd. for C<sub>30</sub>H<sub>23</sub>N<sub>2</sub>O<sub>3</sub> [M+H]<sup>+</sup>: 459.1703; found: 459.1708.

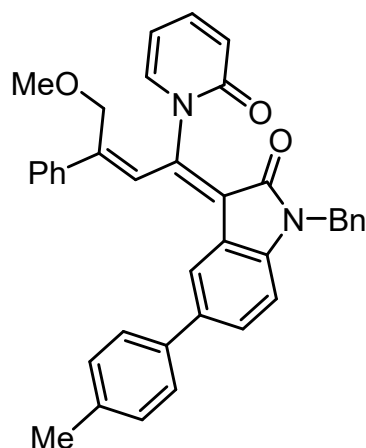

**(Z)-1-benzyl-3-((Z)-4-methoxy-1-(2-oxopyridin-1(2H)-yl)-3-phenylbut-2-en-1-ylidene)-5-(p-tolyl)indolin-2-one**

**6c:** 39.5 mg, red brown solid, 70% yield.

<sup>1</sup>H NMR (400 MHz, CDCl<sub>3</sub>) δ 7.80 (s, 1H), 7.63 – 7.59 (m, 2H), 7.50 – 7.37 (m, 7H), 7.34 – 7.29 (m, 6H), 7.16 – 7.12 (m, 3H), 6.75 (d, *J* = 8.1 Hz, 1H), 6.68 (d, *J* = 9.3 Hz, 1H), 6.33 (t, *J* = 6.5 Hz, 1H), 4.92 (s, 2H), 4.32 (d, *J* = 12.4 Hz, 1H), 4.27 (d, *J* = 12.2 Hz, 1H), 3.15 (s, 3H), 2.35 (s, 3H).

<sup>13</sup>C NMR (125 MHz, CDCl<sub>3</sub>) δ 164.9, 162.2, 147.1, 142.4, 142.0, 140.7, 139.9, 138.6, 137.8, 137.1, 135.9, 135.6, 129.7, 129.1, 128.9, 128.8, 127.8, 127.5, 127.1, 126.8, 126.5, 125.4, 124.6, 123.7, 122.04, 122.02, 109.5, 106.0, 69.8, 58.5, 43.8, 21.2.

**HRMS-ESI:** calcd. for C<sub>38</sub>H<sub>33</sub>N<sub>2</sub>O<sub>3</sub> [M+H]<sup>+</sup>: 565.2486; found: 565.2490.

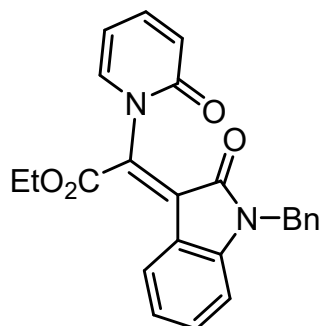

**ethyl (Z)-2-(1-benzyl-2-oxoindolin-3-ylidene)-2-(2-oxopyridin-1(2H)-yl)acetate**

**8:** 28.0 mg, red brown solid, 36% yield.

<sup>1</sup>H NMR (500 MHz, CDCl<sub>3</sub>) δ 7.99 (d, *J* = 7.8 Hz, 1H), 7.50 – 7.45 (m, 1H), 7.33 – 7.26 (m, 4H), 7.26 – 7.21 (m, 3H), 7.01 (t, *J* = 7.7 Hz, 1H), 6.71 (d, *J* = 7.9 Hz, 1H), 6.63 (d, *J* = 9.3 Hz, 1H), 6.31 (t, *J* = 6.7 Hz, 1H), 4.86 (s, 2H), 4.41 (q, *J* = 7.1 Hz, 2H), 1.33 (t, *J* = 7.1 Hz, 3H).

<sup>13</sup>C NMR (125 MHz, CDCl<sub>3</sub>) δ 164.8, 163.1, 162.5, 144.1, 141.4, 139.2, 135.31, 135.26, 132.5, 129.0, 128.1, 127.9, 127.5, 127.2, 122.7, 121.5, 119.2, 109.5, 106.4, 62.7, 43.9, 14.0.

**HRMS-ESI:** calcd. for C<sub>24</sub>H<sub>21</sub>N<sub>2</sub>O<sub>4</sub> [M+H]<sup>+</sup> : 401.1496; found: 401.1504.

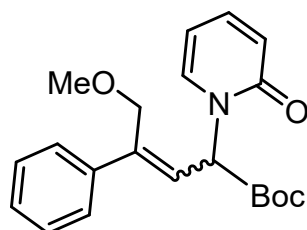

**tert-butyl (Z)-5-methoxy-2-(2-oxopyridin-1(2H)-yl)-4-phenylpent-3-enoate**

**5a:** 61.8 mg, light yellow solid, 87% yield.

<sup>1</sup>H NMR (400 MHz, CDCl<sub>3</sub>) δ 7.45 – 7.39 (m, 3H), 7.37 – 7.30 (m, 4H), 6.59 (d, *J* = 9.1 Hz, 1H), 6.35 (d, *J* = 9.1 Hz, 1H), 6.22 – 6.13 (m, 2H), 4.41 (s, 2H), 3.29 (s, 3H), 1.48 (s, 9H).

<sup>13</sup>C NMR (100 MHz, CDCl<sub>3</sub>) δ 168.5, 162.2, 144.9, 139.9, 139.7, 136.0, 128.6, 128.4, 126.8, 124.0, 120.8, 106.1, 83.2, 69.8, 58.2, 57.1, 28.1.

**HRMS-ESI:** calcd. for C<sub>21</sub>H<sub>26</sub>NO<sub>4</sub> [M+H]<sup>+</sup> : 356.1856; found: 356.1860.

## 9. NMR spectra of new starting materials products

$^1\text{H}$  NMR (400 MHz,  $\text{CDCl}_3$ ) and  $^{13}\text{C}$  NMR (100 MHz,  $\text{CDCl}_3$ ) spectra for 1b

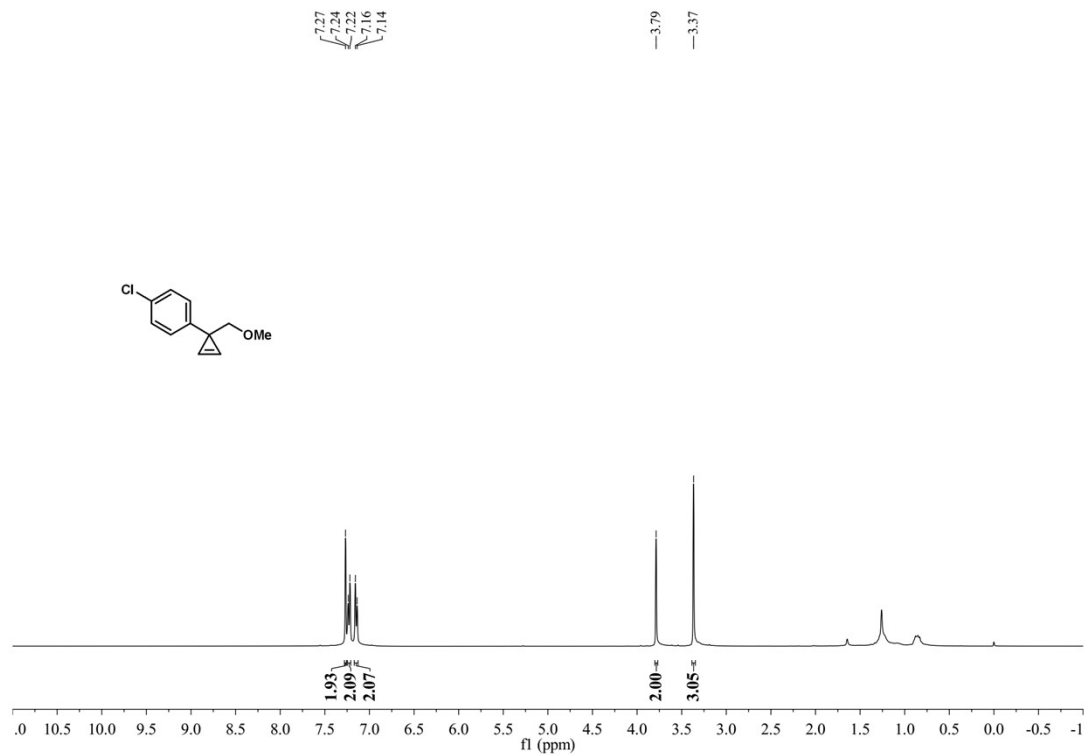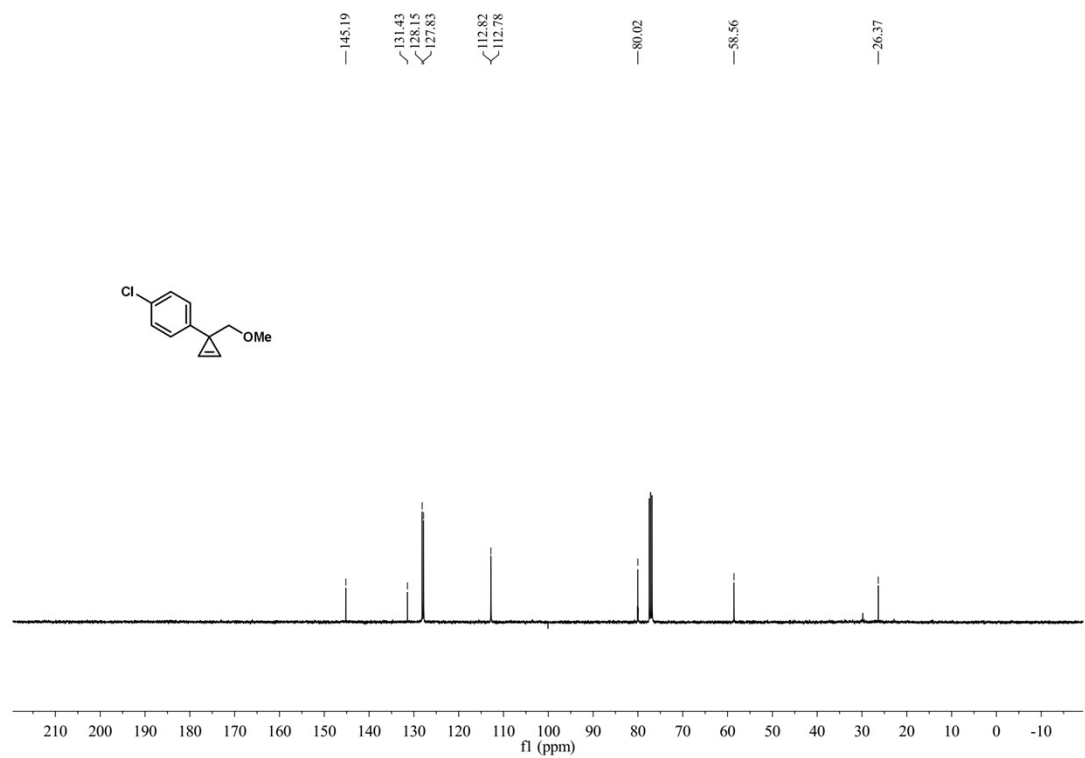

<sup>1</sup>H NMR (400 MHz, CDCl<sub>3</sub>) and <sup>13</sup>C NMR (100 MHz, CDCl<sub>3</sub>) spectra for 1c

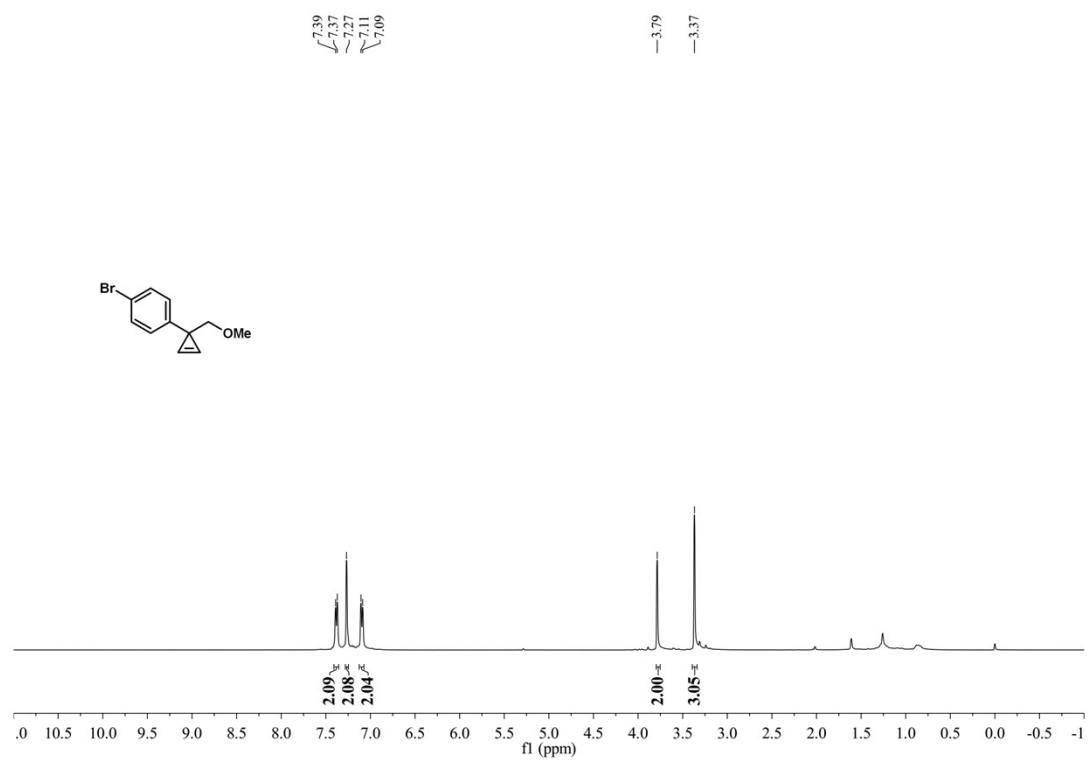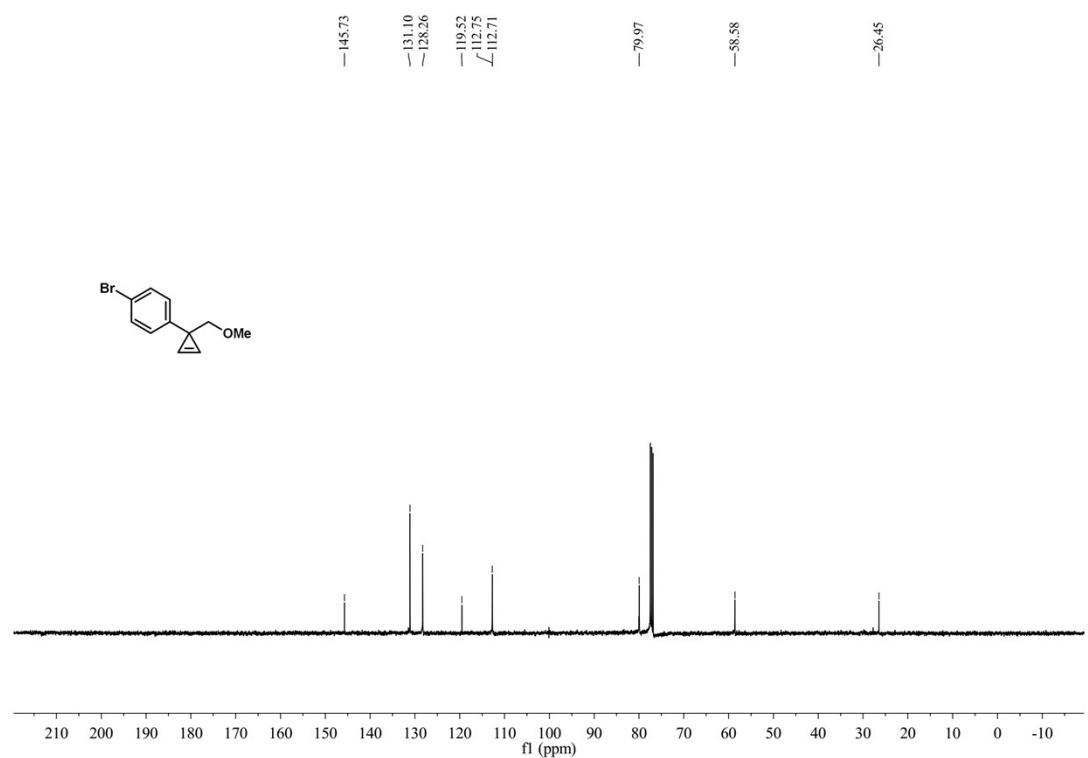

**<sup>1</sup>H NMR (400 MHz, CDCl<sub>3</sub>) and <sup>13</sup>C NMR (100 MHz, CDCl<sub>3</sub>) spectra for 1d**

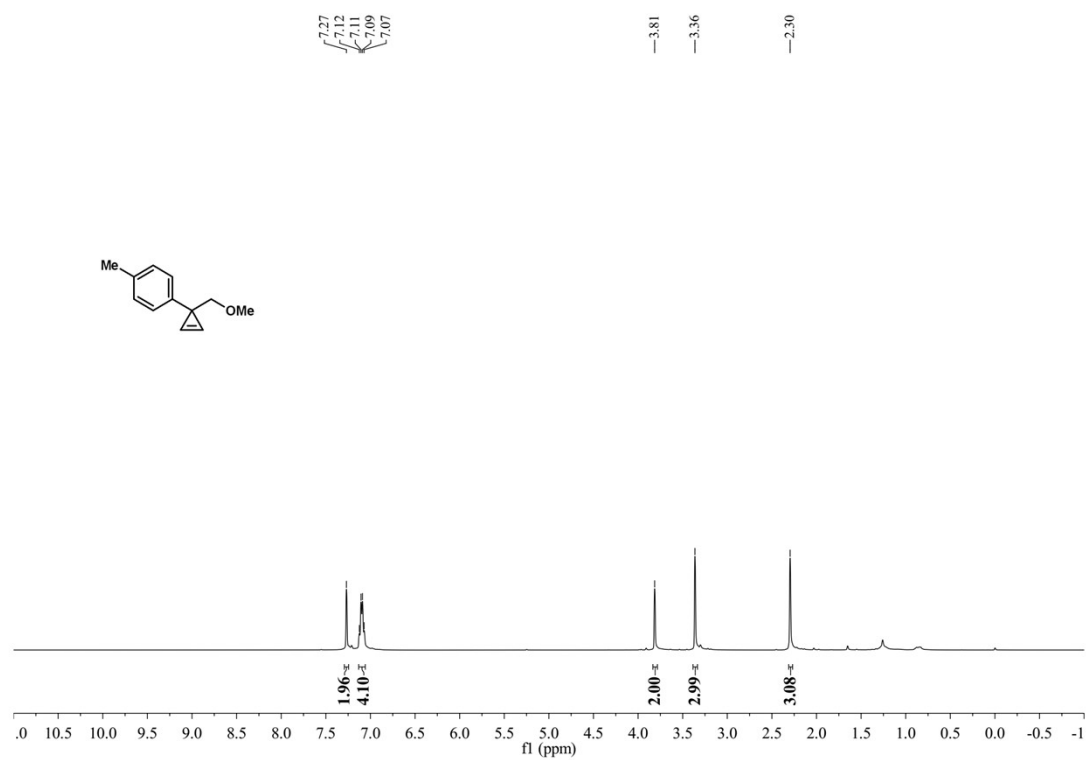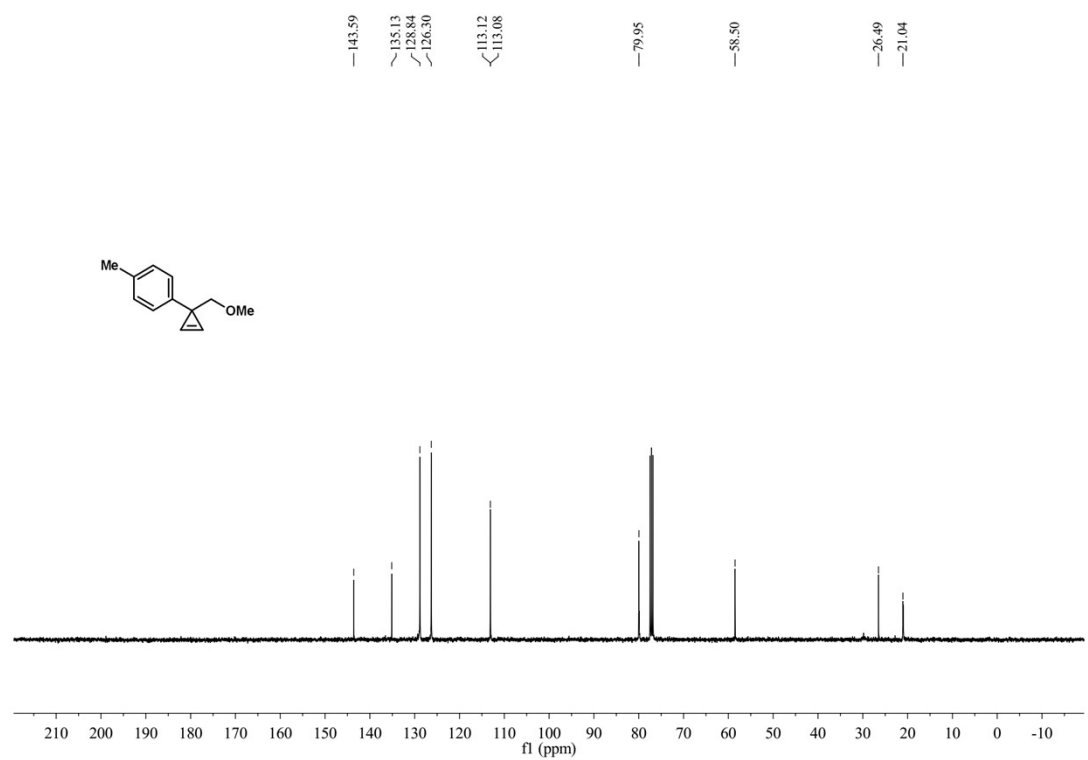

<sup>1</sup>H NMR (400 MHz, CDCl<sub>3</sub>) and <sup>13</sup>C NMR (100 MHz, CDCl<sub>3</sub>) spectra for 1e

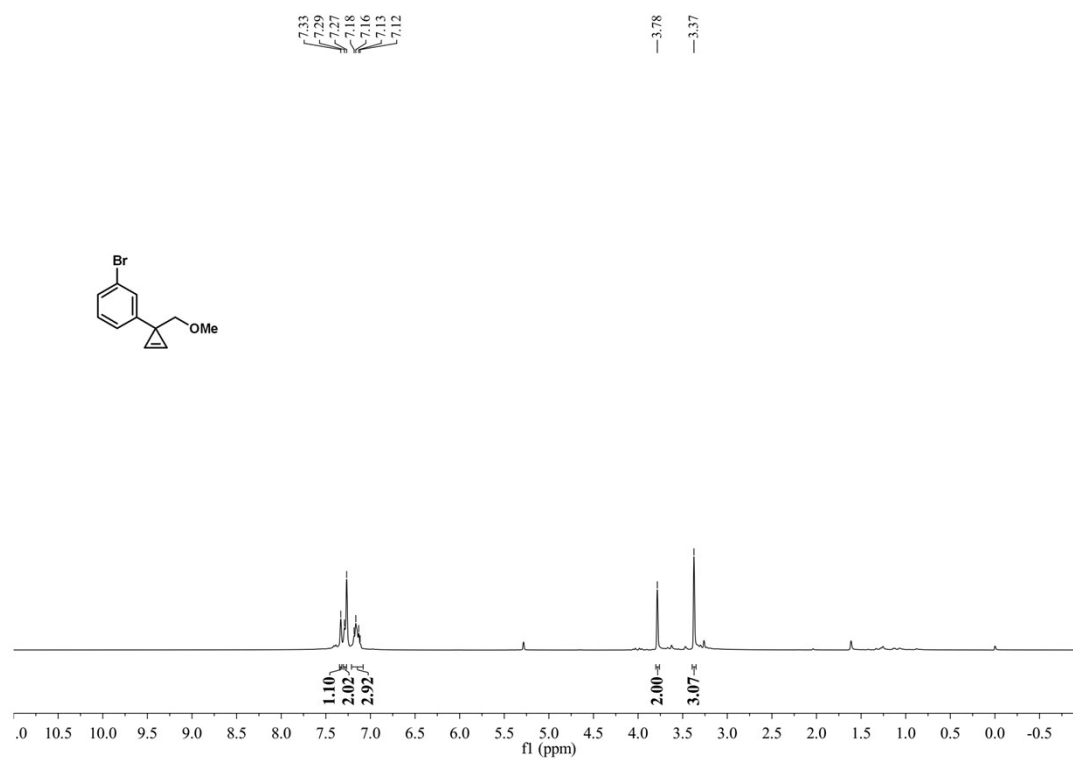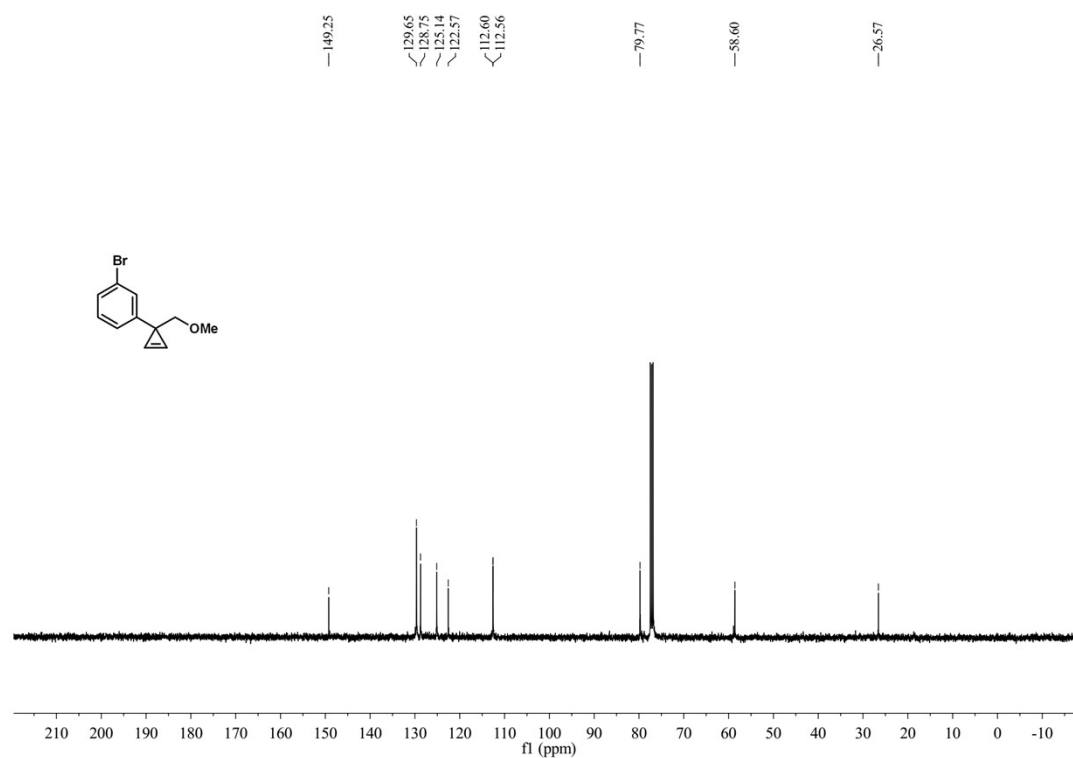

<sup>1</sup>H NMR (500 MHz, CDCl<sub>3</sub>) and <sup>13</sup>C NMR (125 MHz, CDCl<sub>3</sub>) spectra for 1f

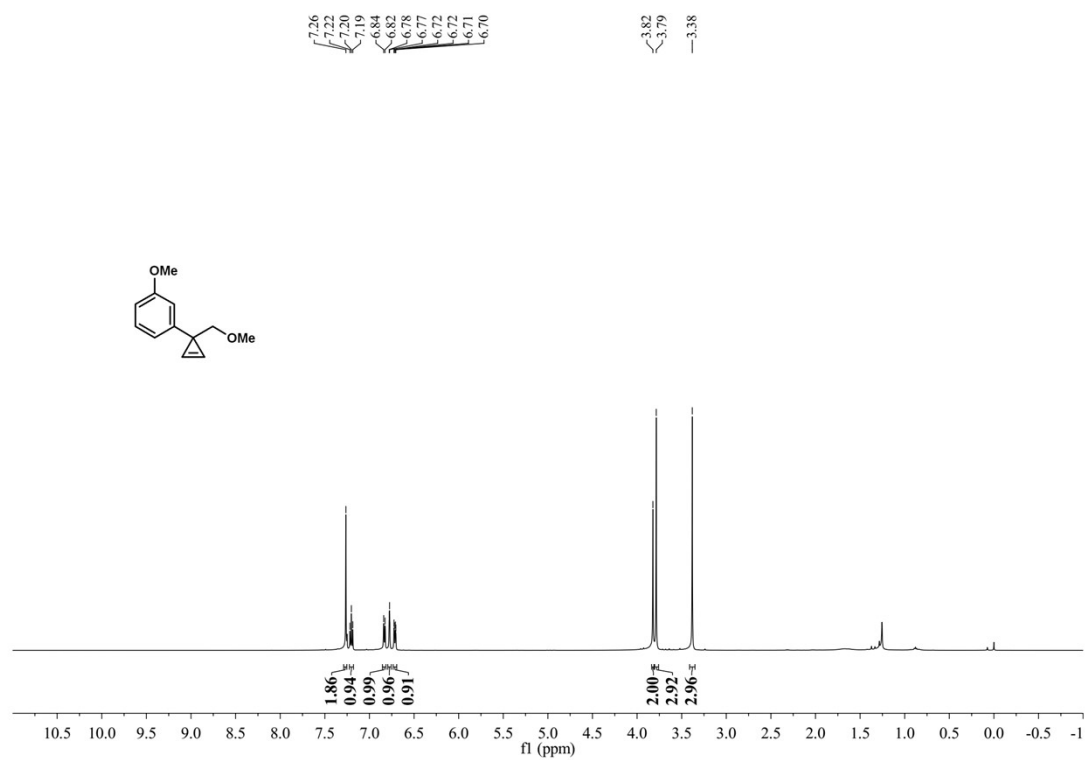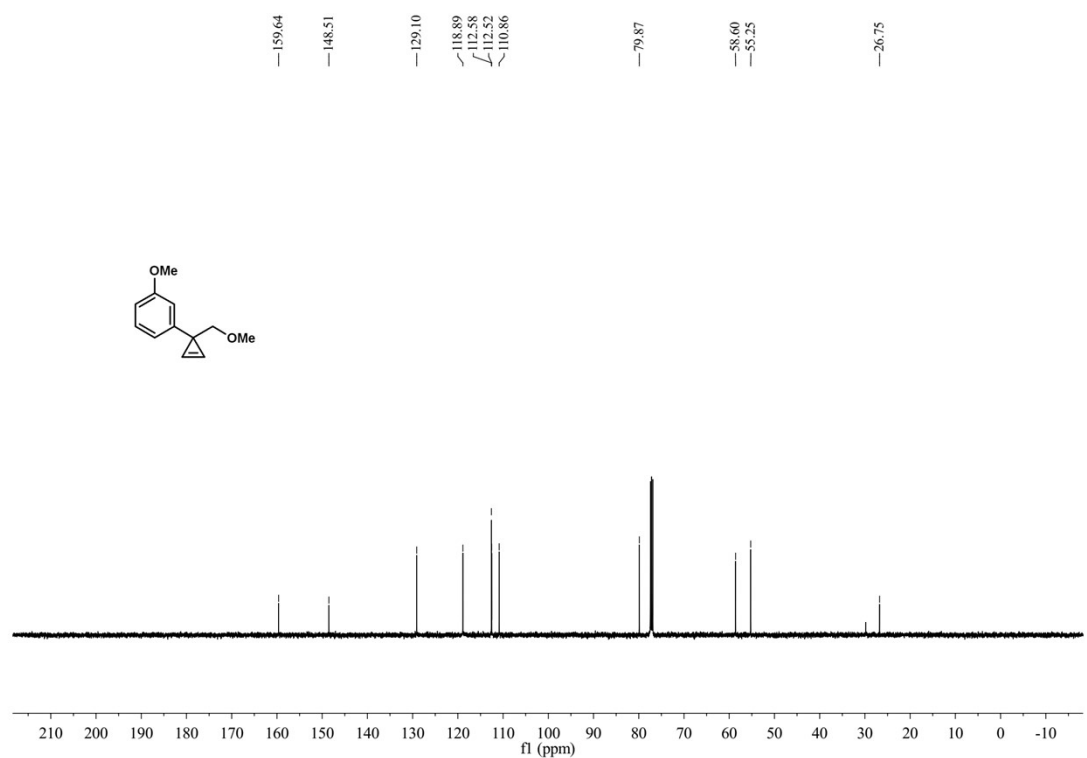

<sup>1</sup>H NMR (500 MHz, CDCl<sub>3</sub>) and <sup>13</sup>C NMR (125 MHz, CDCl<sub>3</sub>) spectra for 1g

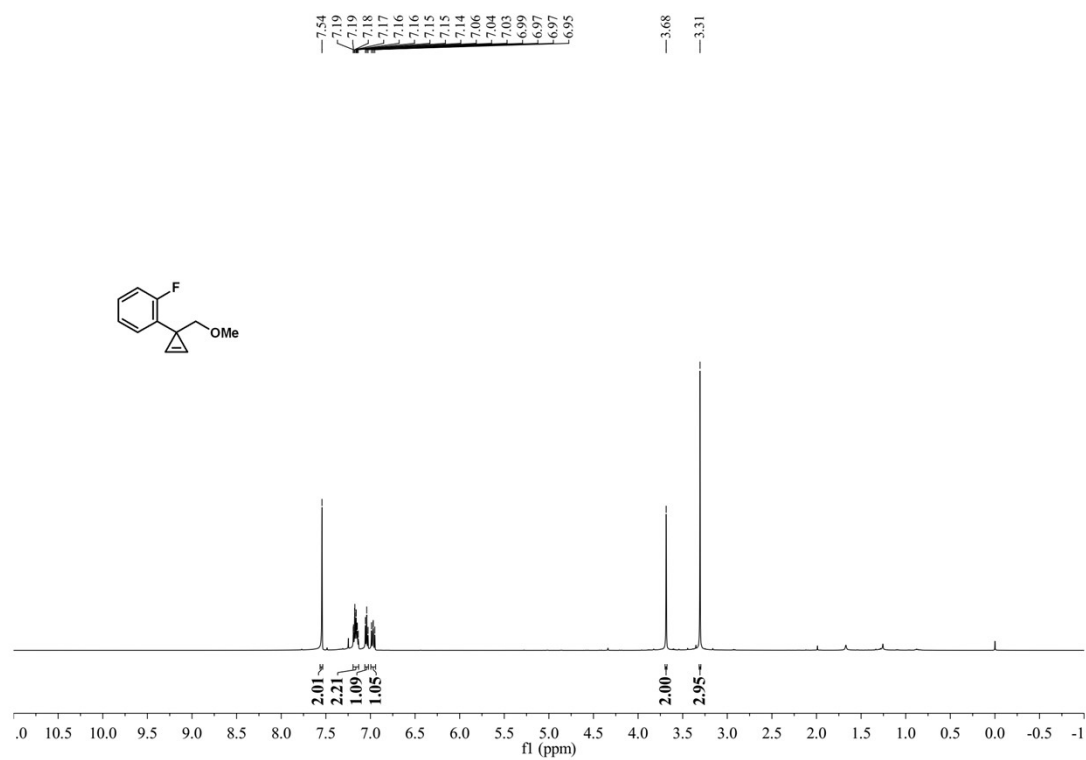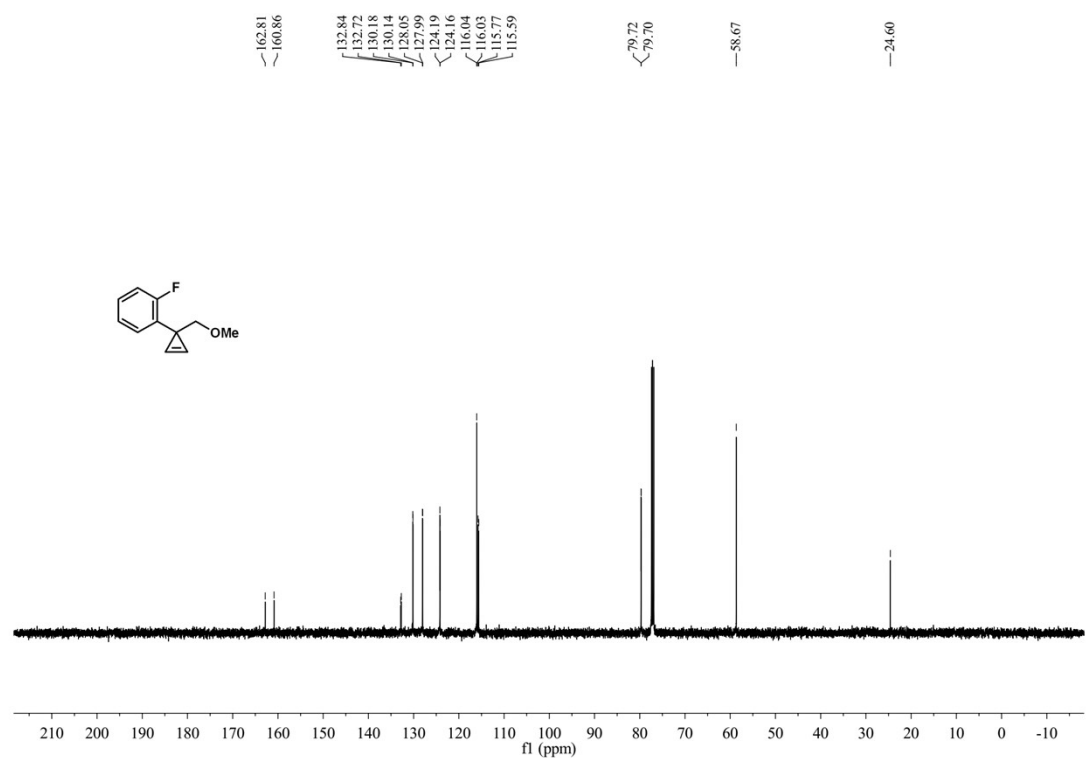



**<sup>19</sup>F NMR (376 MHz, CDCl<sub>3</sub>) spectra for 1g**

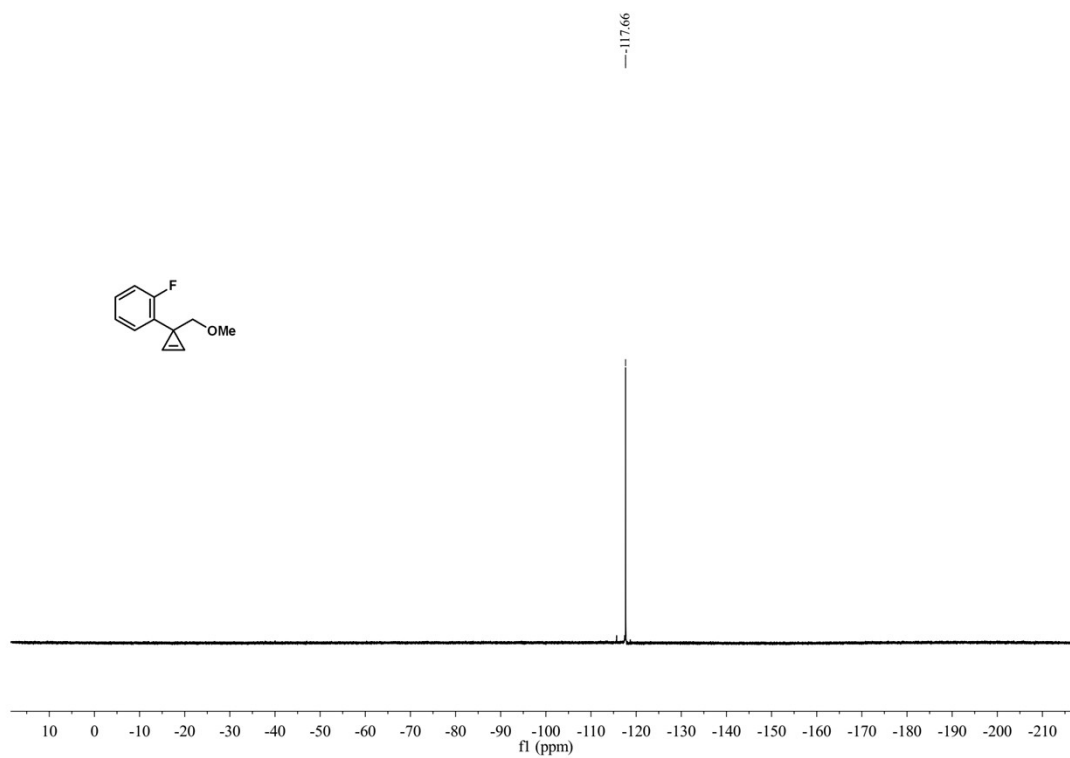

<sup>1</sup>H NMR (400 MHz, CDCl<sub>3</sub>) and <sup>13</sup>C NMR (100 MHz, CDCl<sub>3</sub>) spectra for 1h

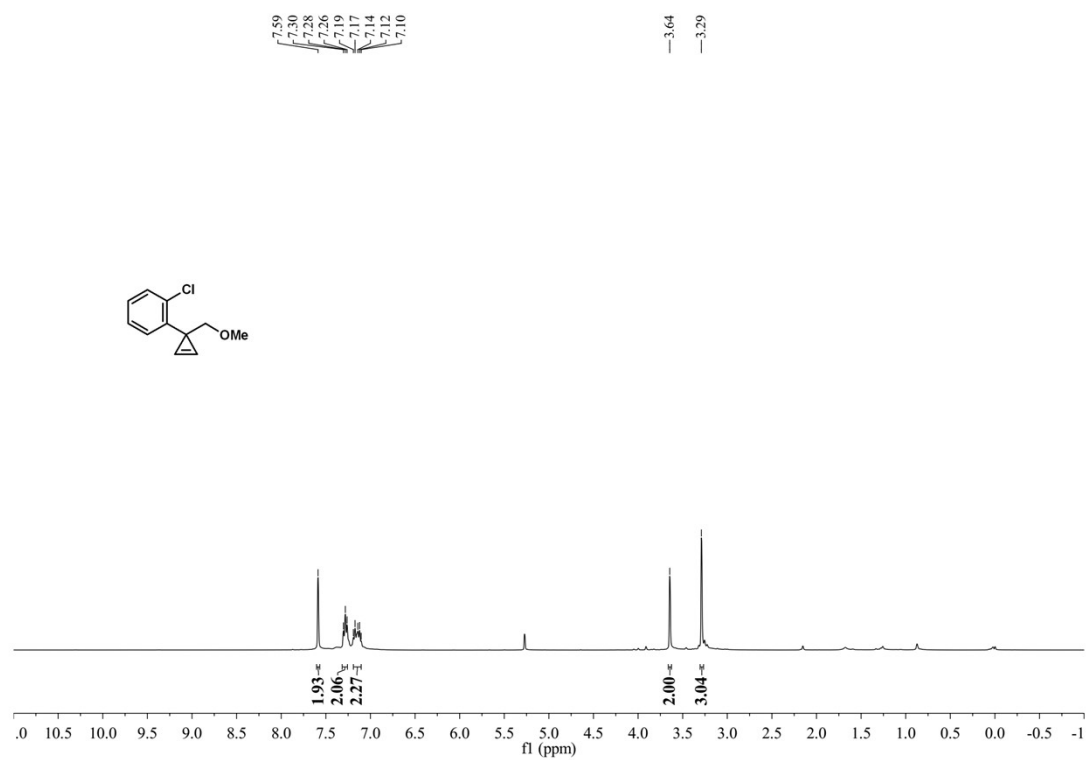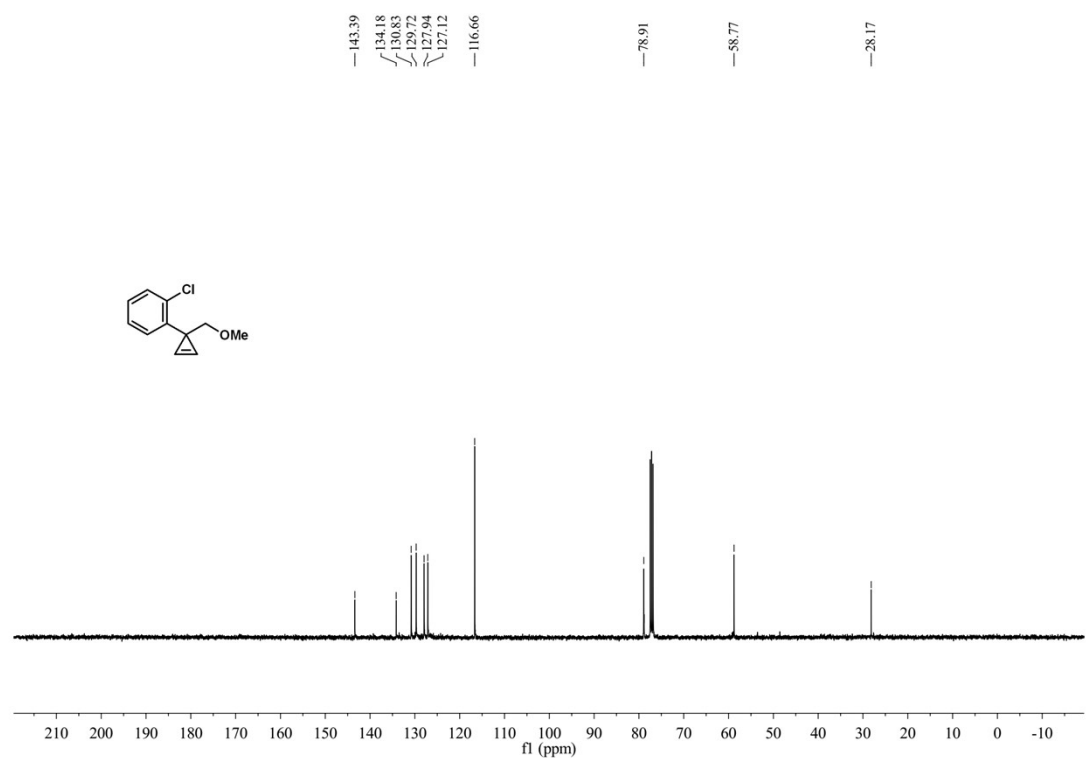

<sup>1</sup>H NMR (400 MHz, CDCl<sub>3</sub>) and <sup>13</sup>C NMR (100 MHz, CDCl<sub>3</sub>) spectra for **1i**

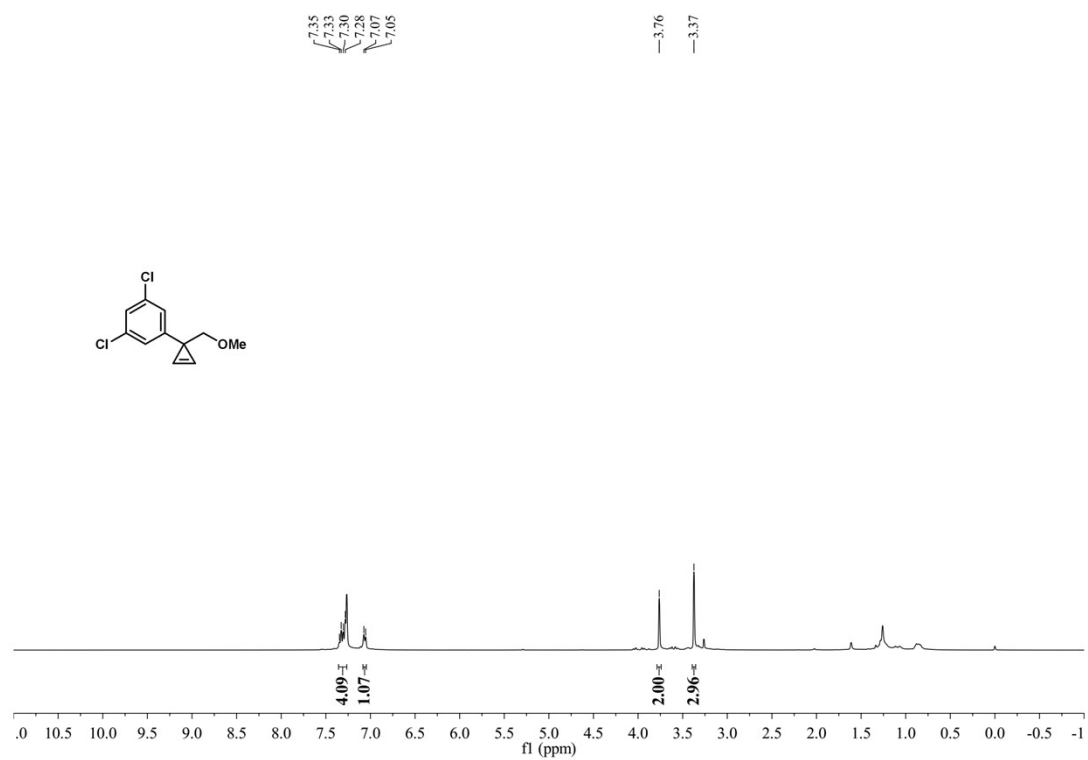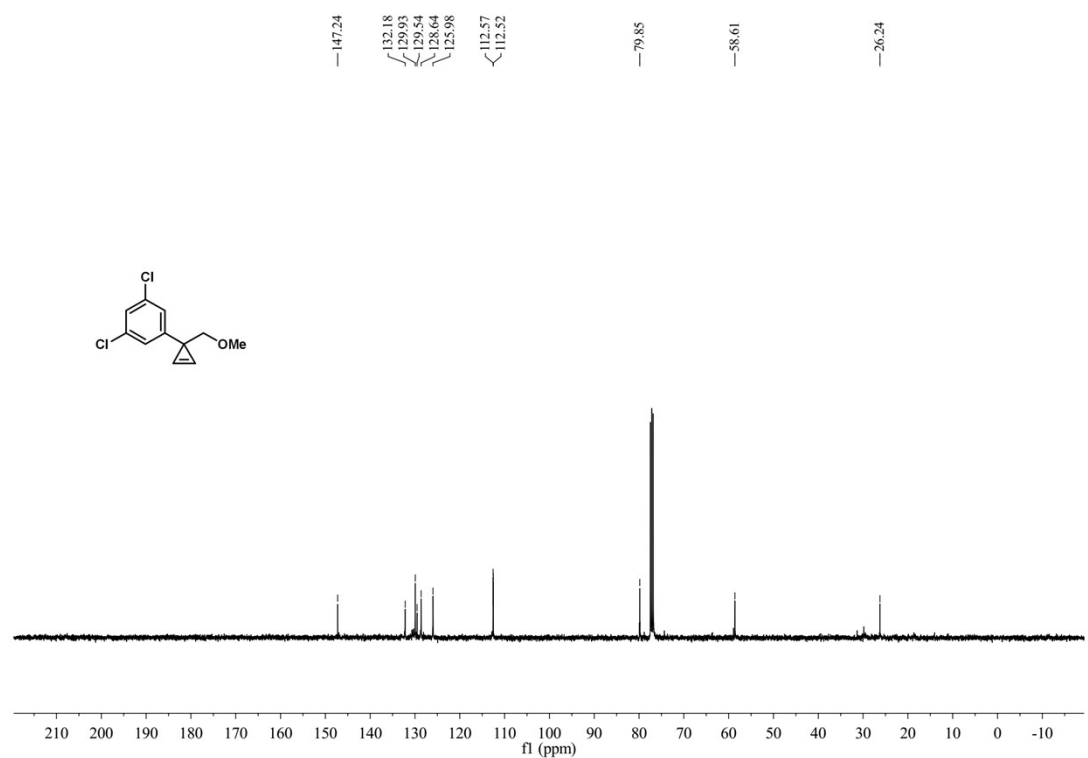

<sup>1</sup>H NMR (400 MHz, CDCl<sub>3</sub>) and <sup>13</sup>C NMR (100 MHz, CDCl<sub>3</sub>) spectra for 1j

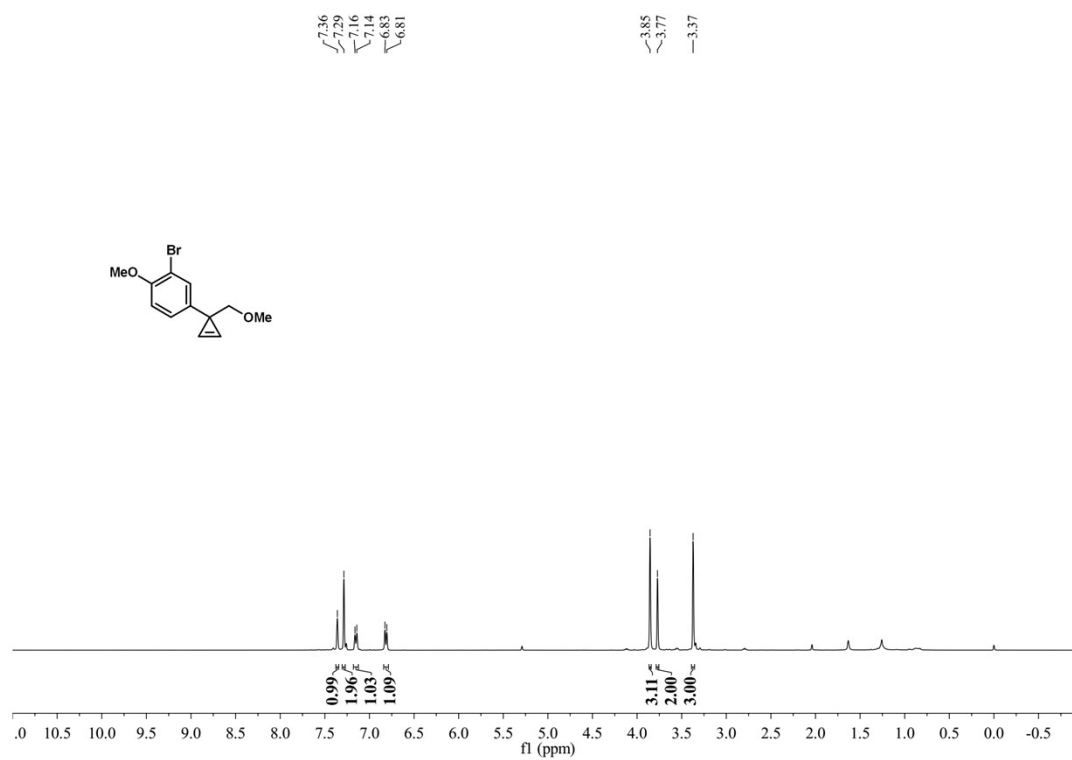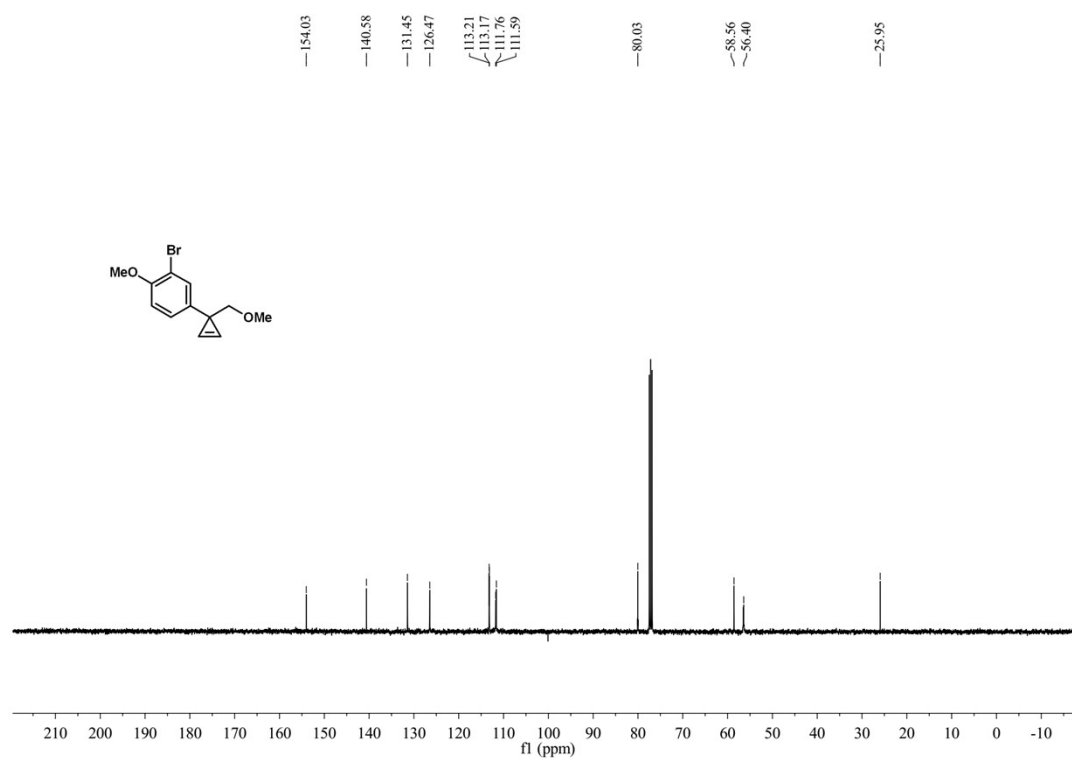

<sup>1</sup>H NMR (400 MHz, CDCl<sub>3</sub>) and <sup>13</sup>C NMR (100 MHz, CDCl<sub>3</sub>) spectra for 1k

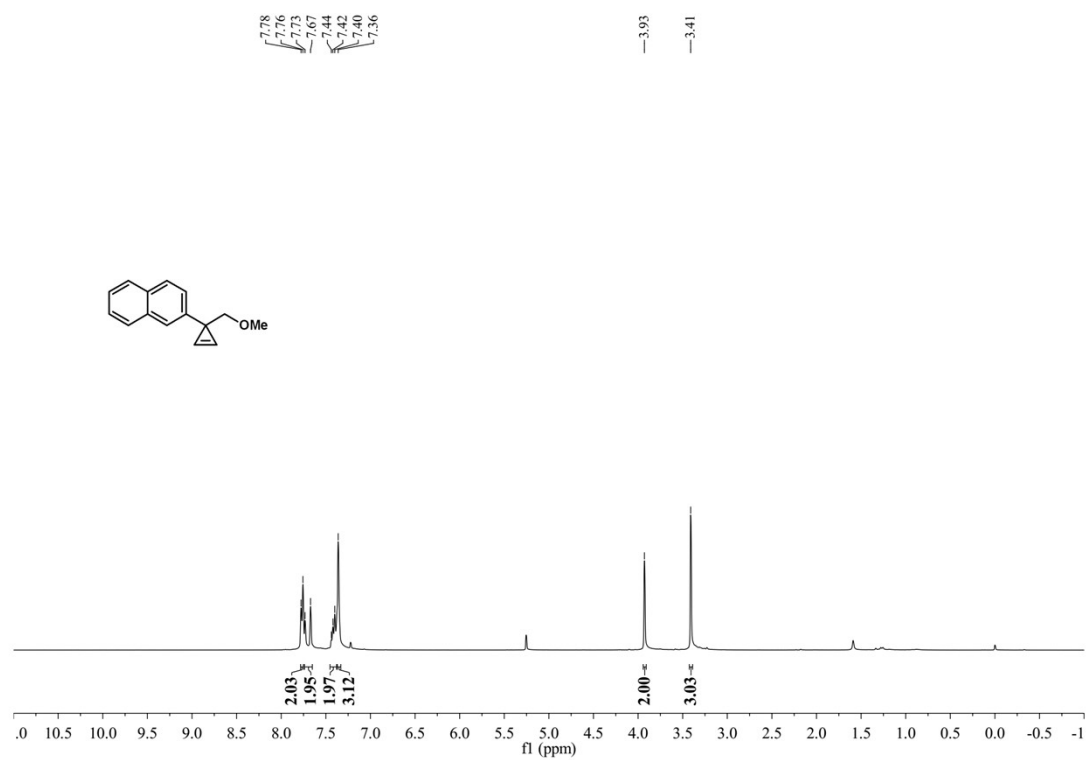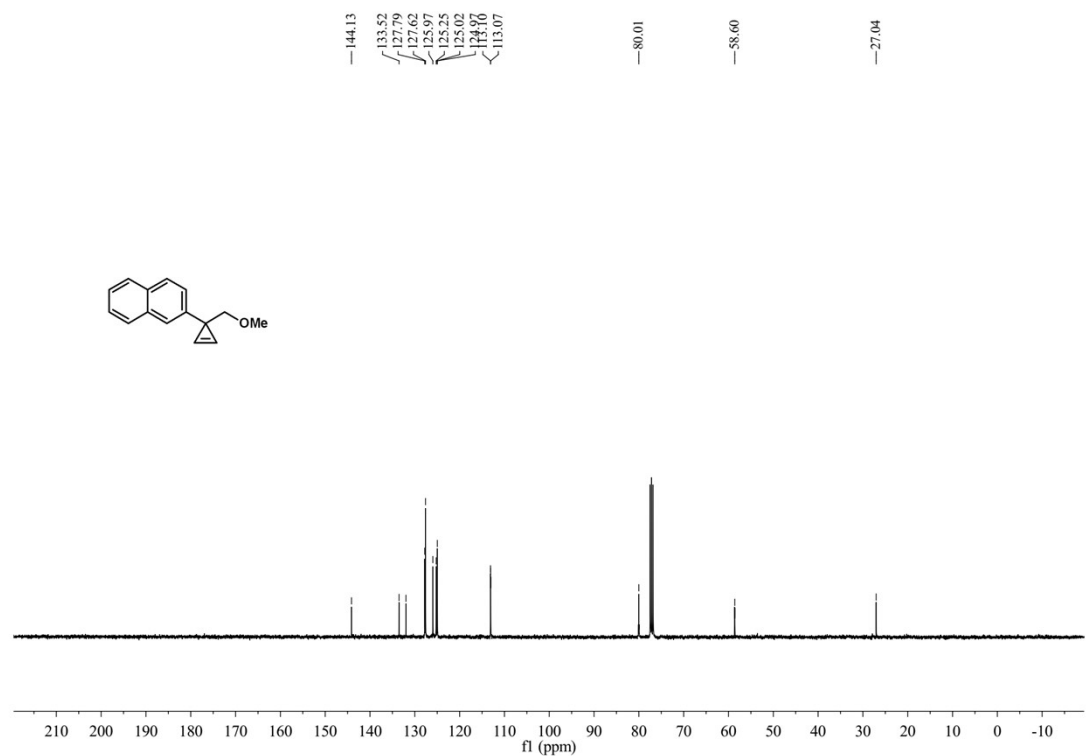

<sup>1</sup>H NMR (400 MHz, CDCl<sub>3</sub>) and <sup>13</sup>C NMR (100 MHz, CDCl<sub>3</sub>) spectra for 11

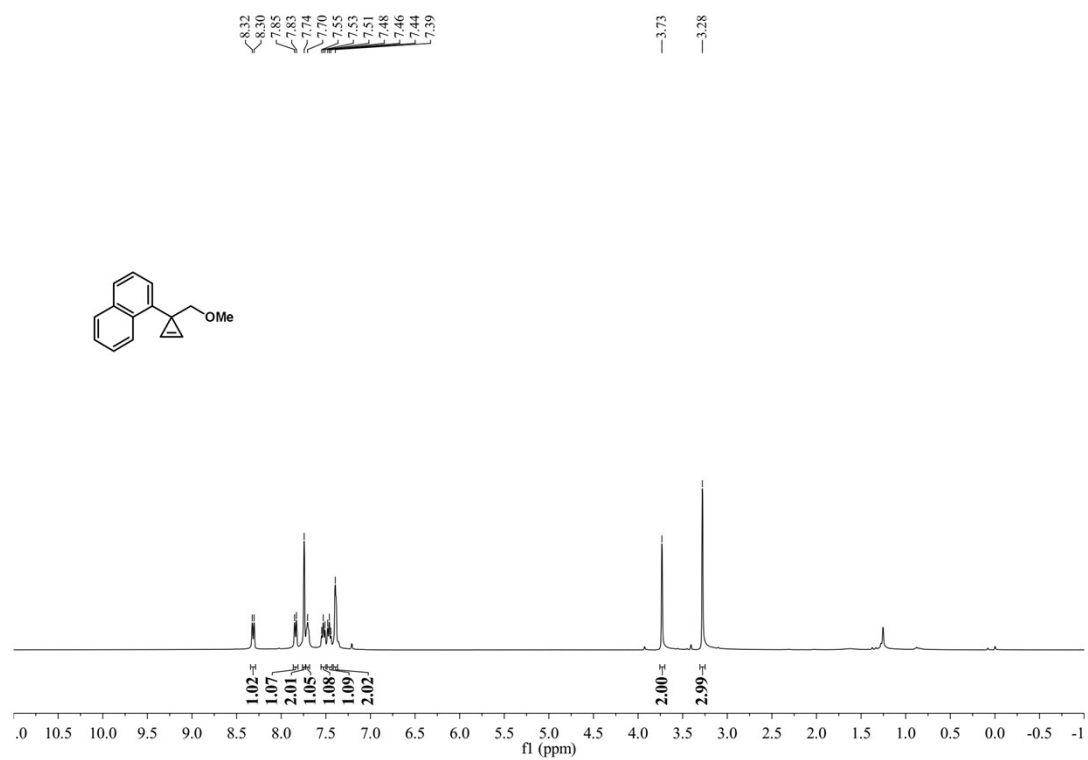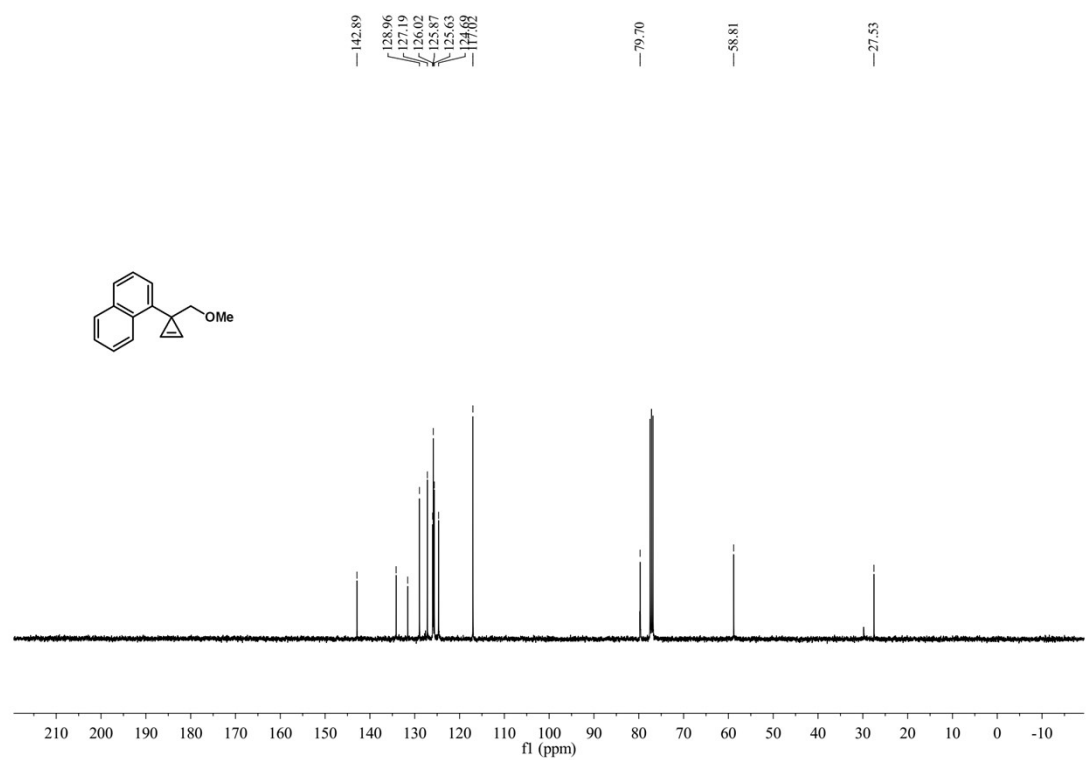

**<sup>1</sup>H NMR (400 MHz, CDCl<sub>3</sub>) and <sup>13</sup>C NMR (100 MHz, CDCl<sub>3</sub>) spectra for 1m**

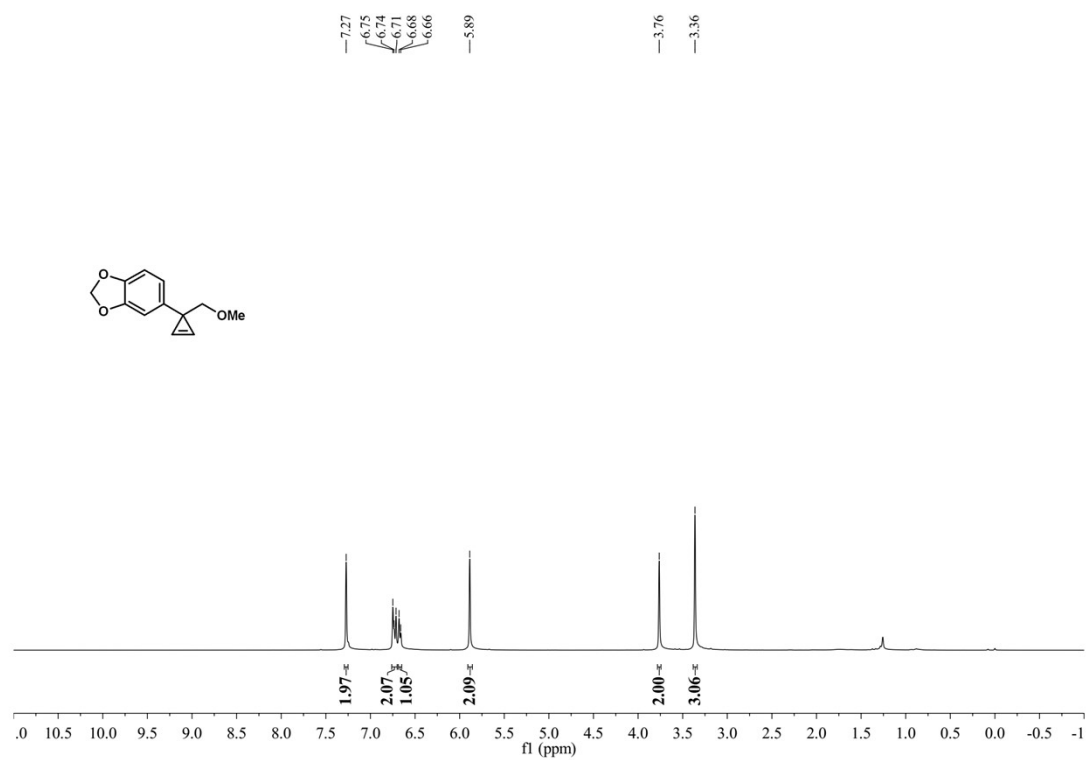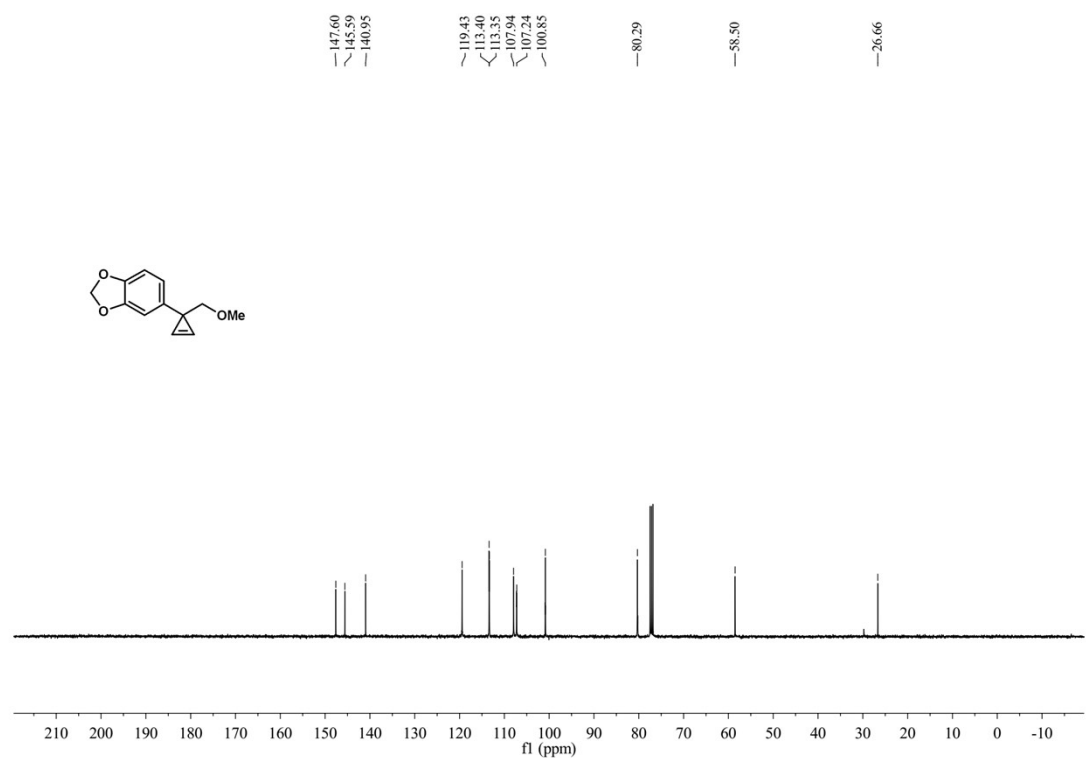

<sup>1</sup>H NMR (500 MHz, CDCl<sub>3</sub>) and <sup>13</sup>C NMR (125 MHz, CDCl<sub>3</sub>) spectra for 2f

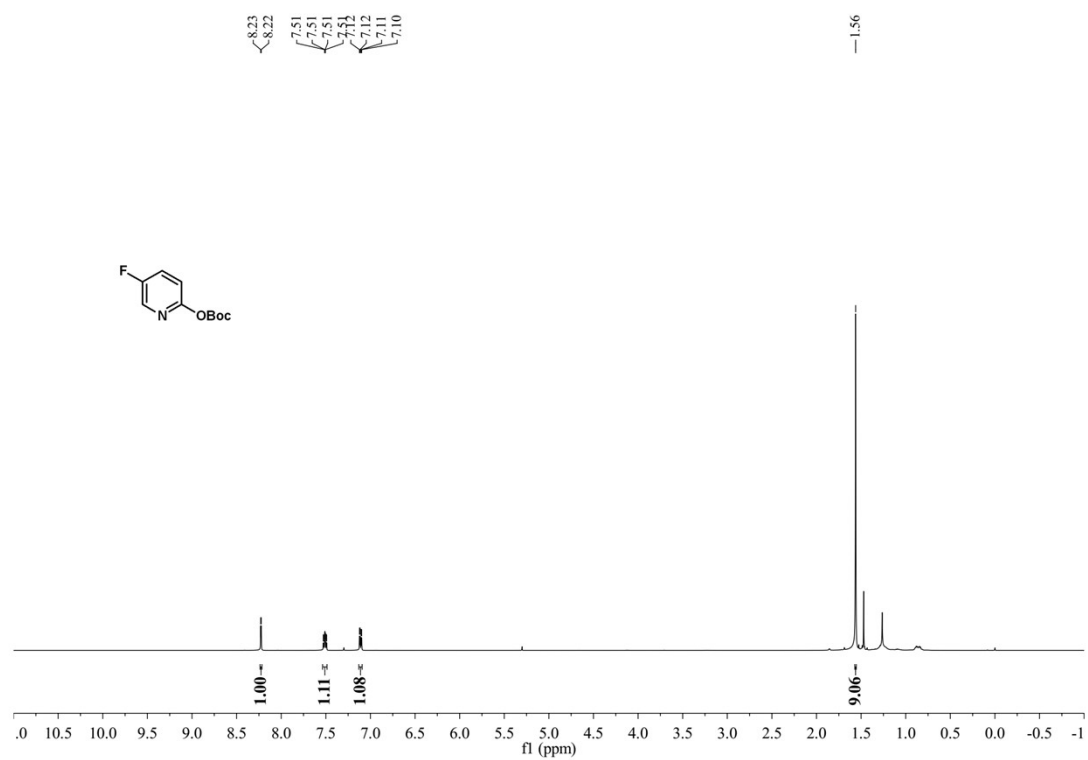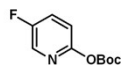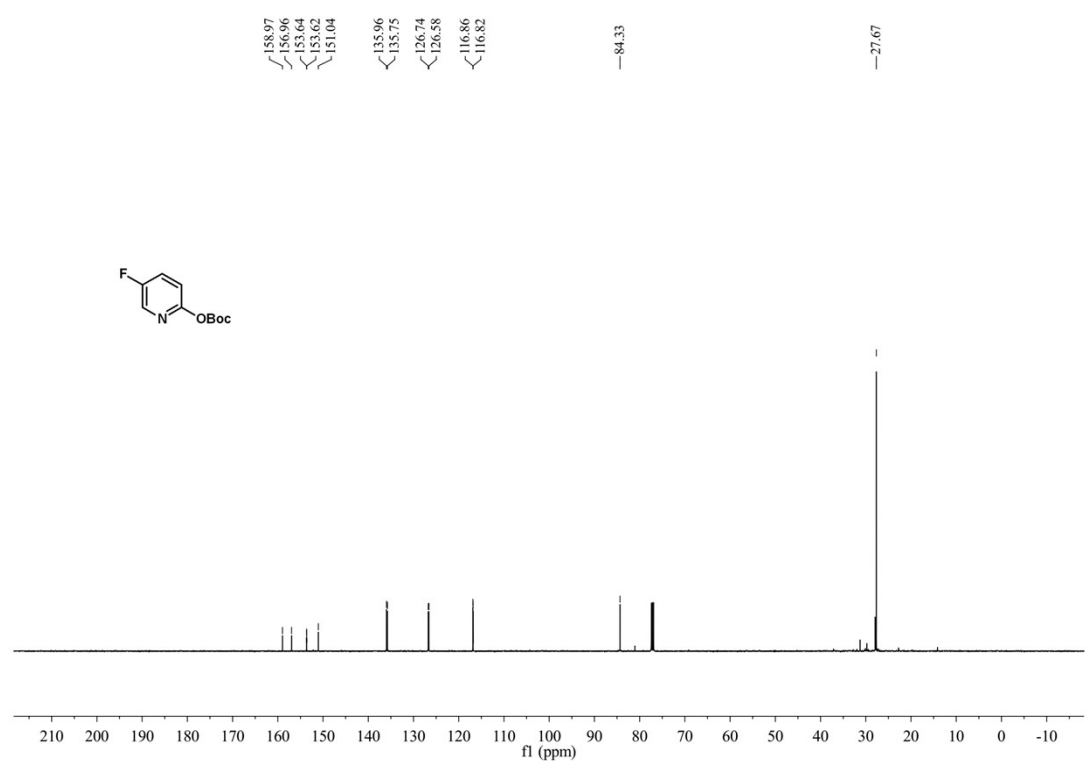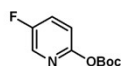



**<sup>19</sup>F NMR (376 MHz, CDCl<sub>3</sub>) spectra for 2f**

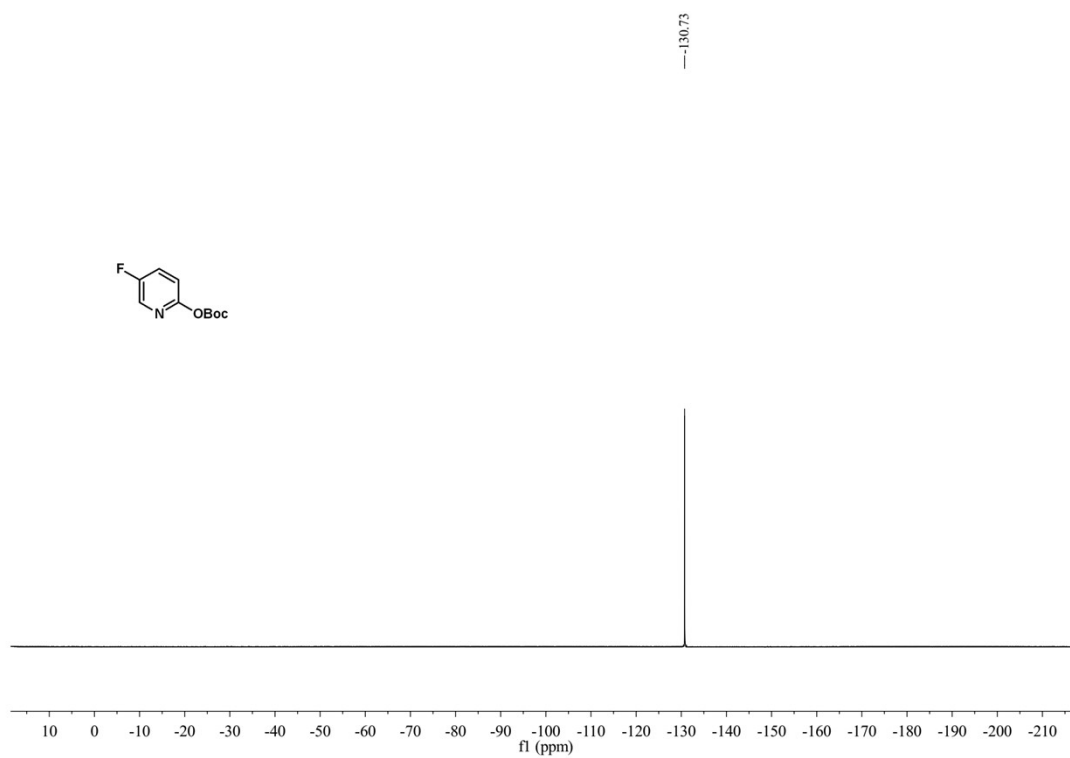

<sup>1</sup>H NMR (500 MHz, CDCl<sub>3</sub>) and <sup>13</sup>C NMR (125 MHz, CDCl<sub>3</sub>) spectra for 2g

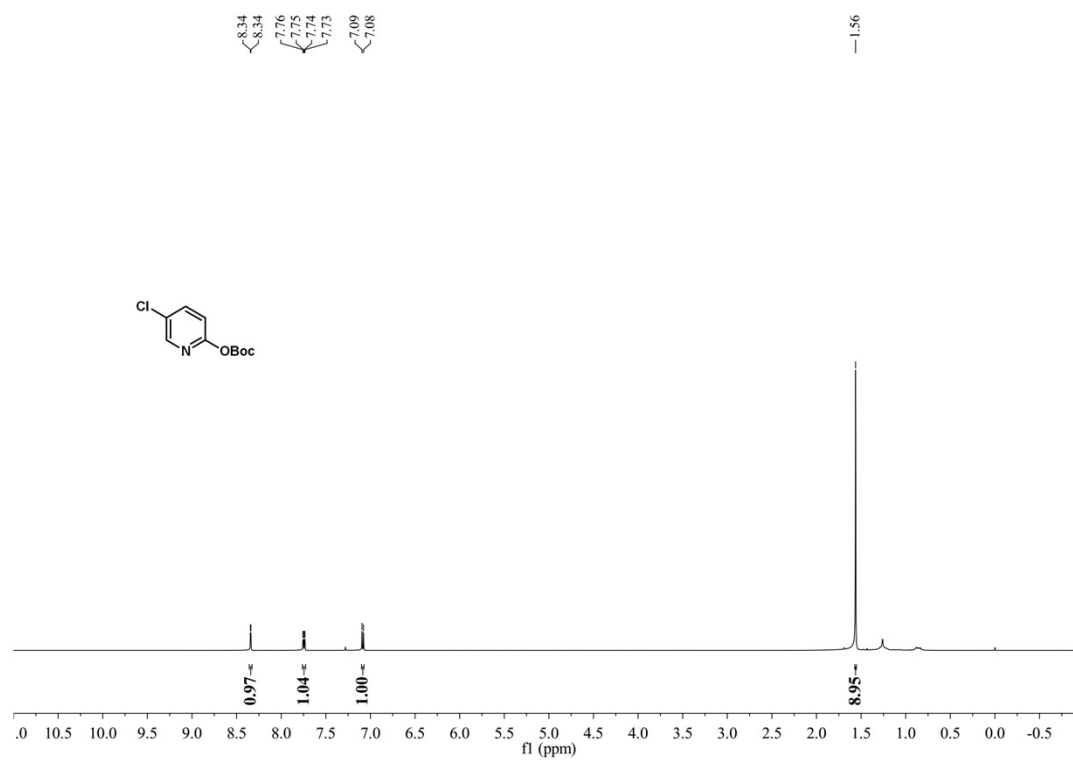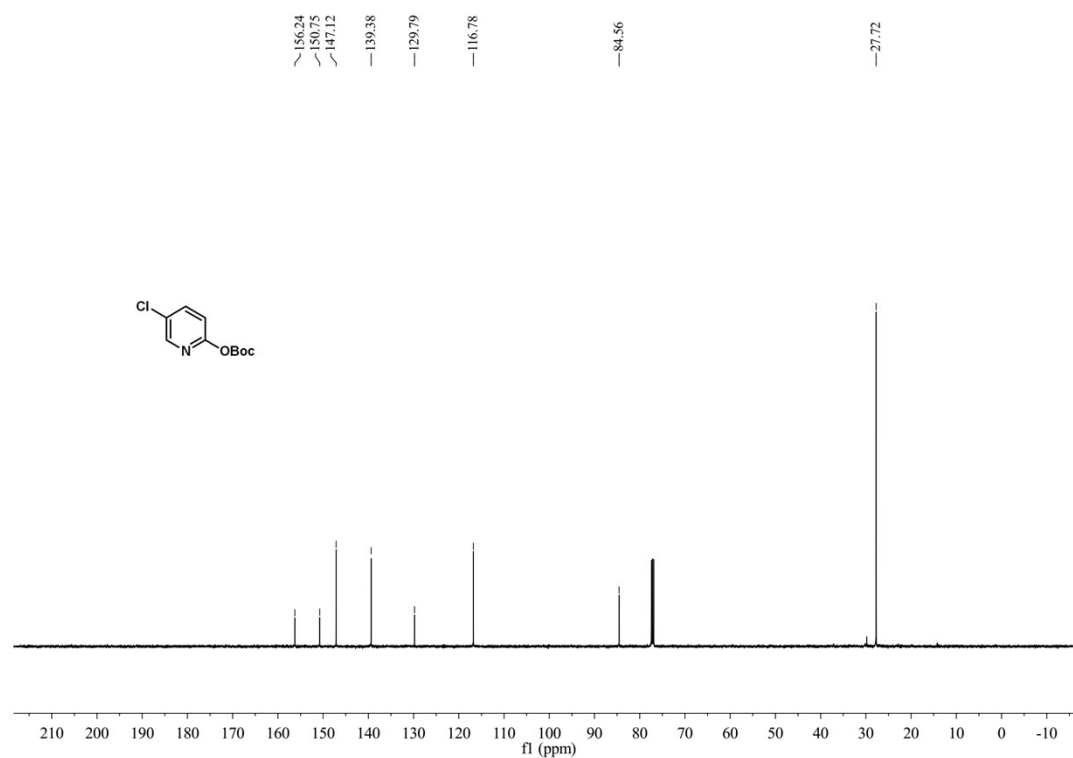

<sup>1</sup>H NMR (500 MHz, CDCl<sub>3</sub>) and <sup>13</sup>C NMR (125 MHz, CDCl<sub>3</sub>) spectra for 2k

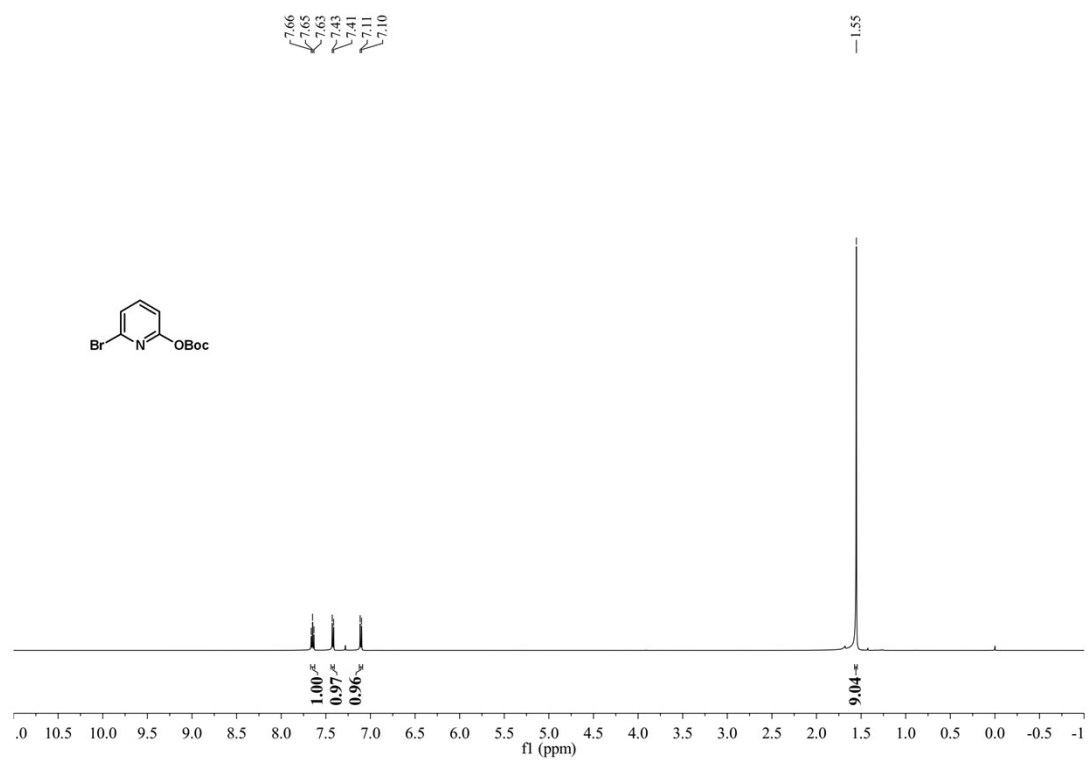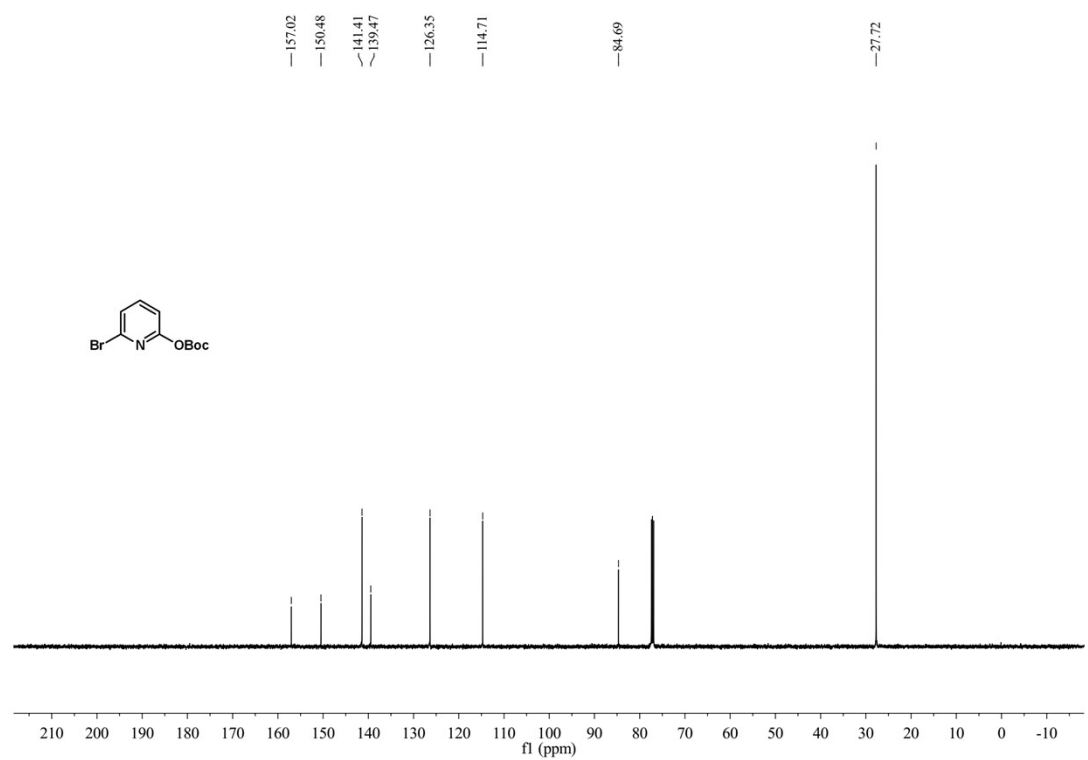

<sup>1</sup>H NMR (500 MHz, CDCl<sub>3</sub>) and <sup>13</sup>C NMR (125 MHz, CDCl<sub>3</sub>) spectra for 2l

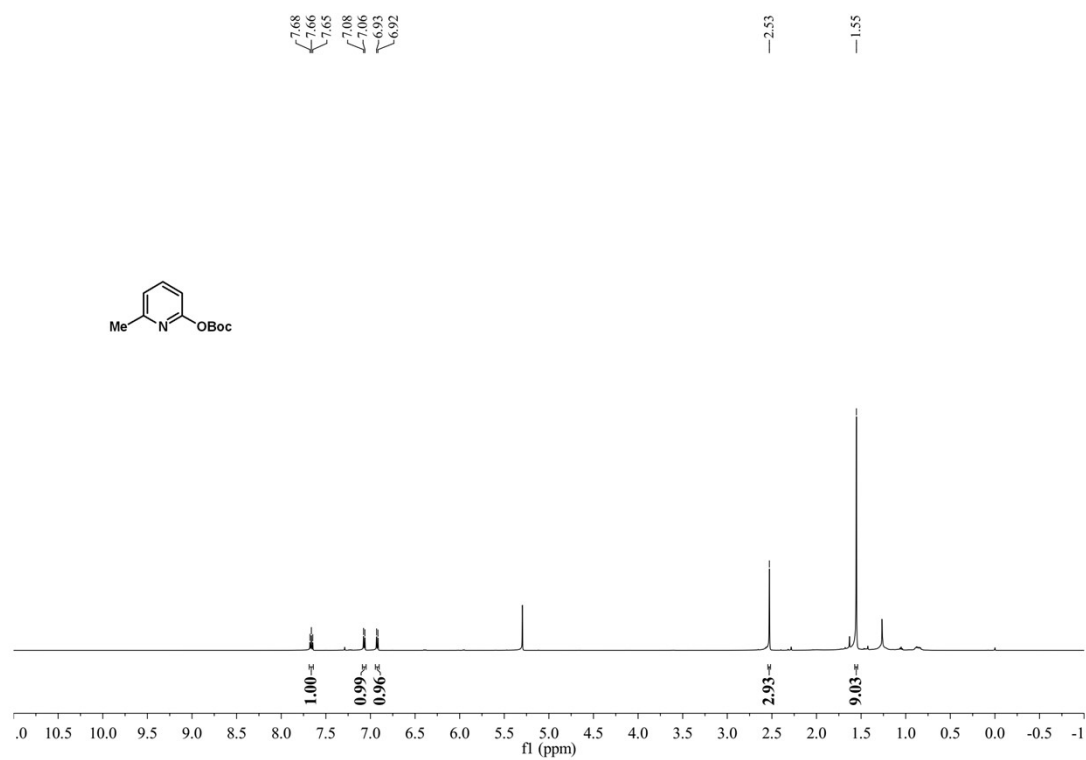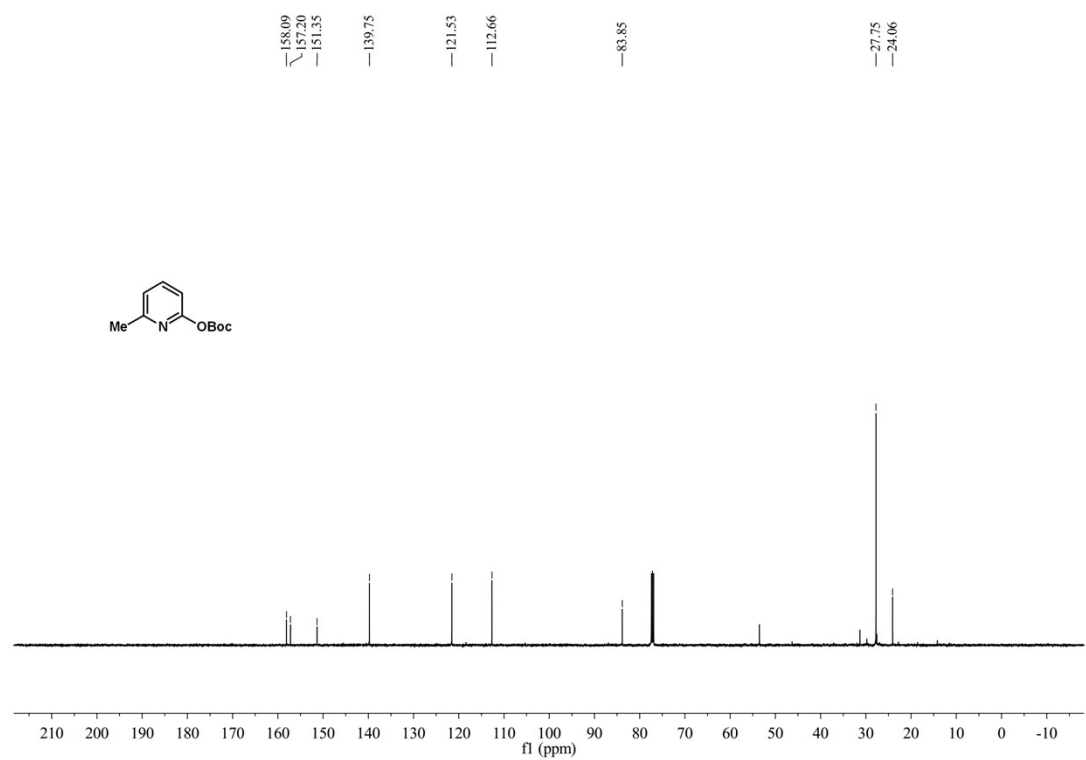

## 10. NMR spectra of products

$^1\text{H}$  NMR (500 MHz,  $\text{CDCl}_3$ ) and  $^{13}\text{C}$  NMR (125 MHz,  $\text{CDCl}_3$ ) spectra for 4aa

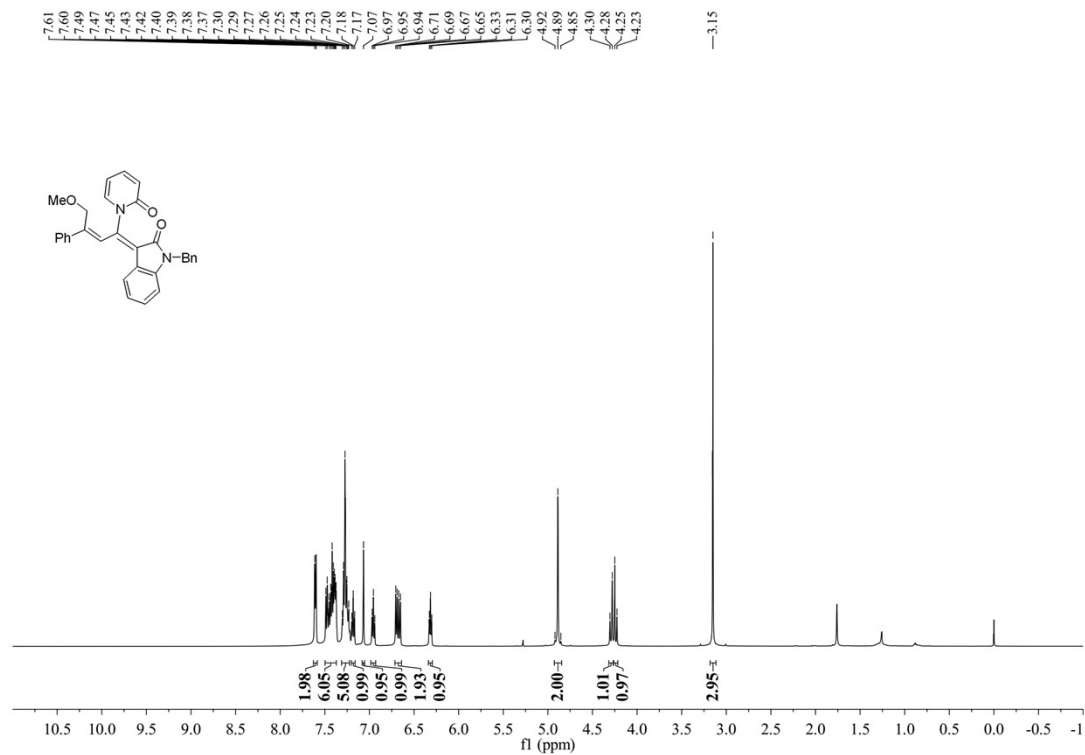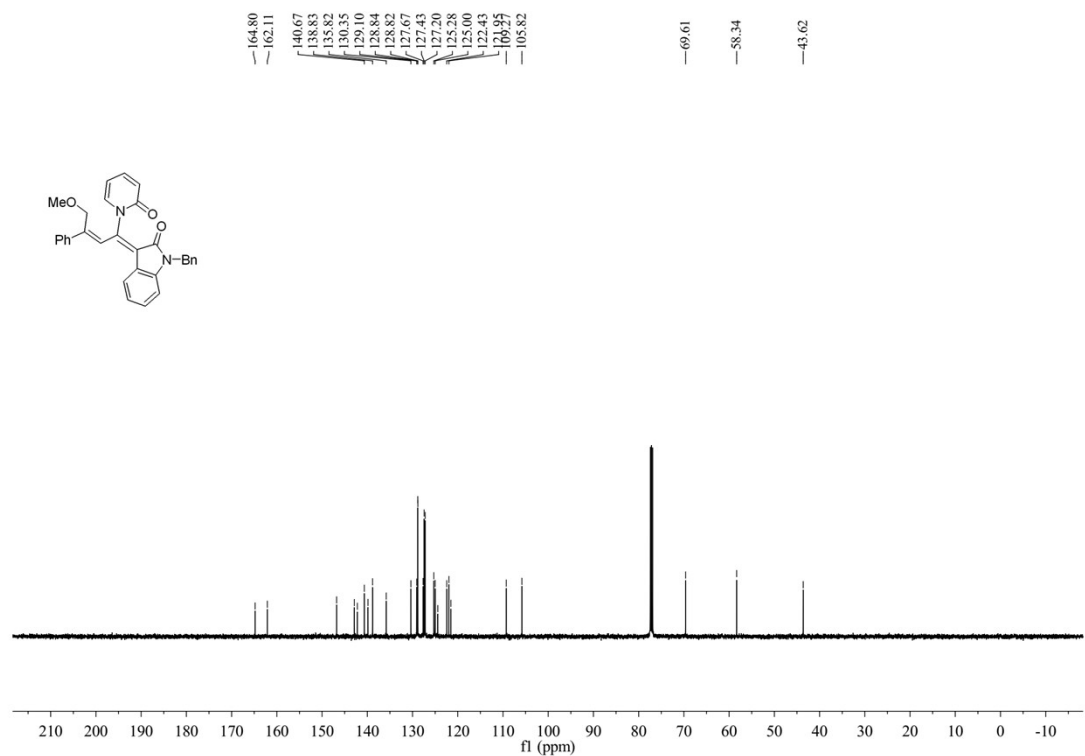

<sup>1</sup>H NMR (500 MHz, CDCl<sub>3</sub>) and <sup>13</sup>C NMR (125 MHz, CDCl<sub>3</sub>) spectra for 4ab

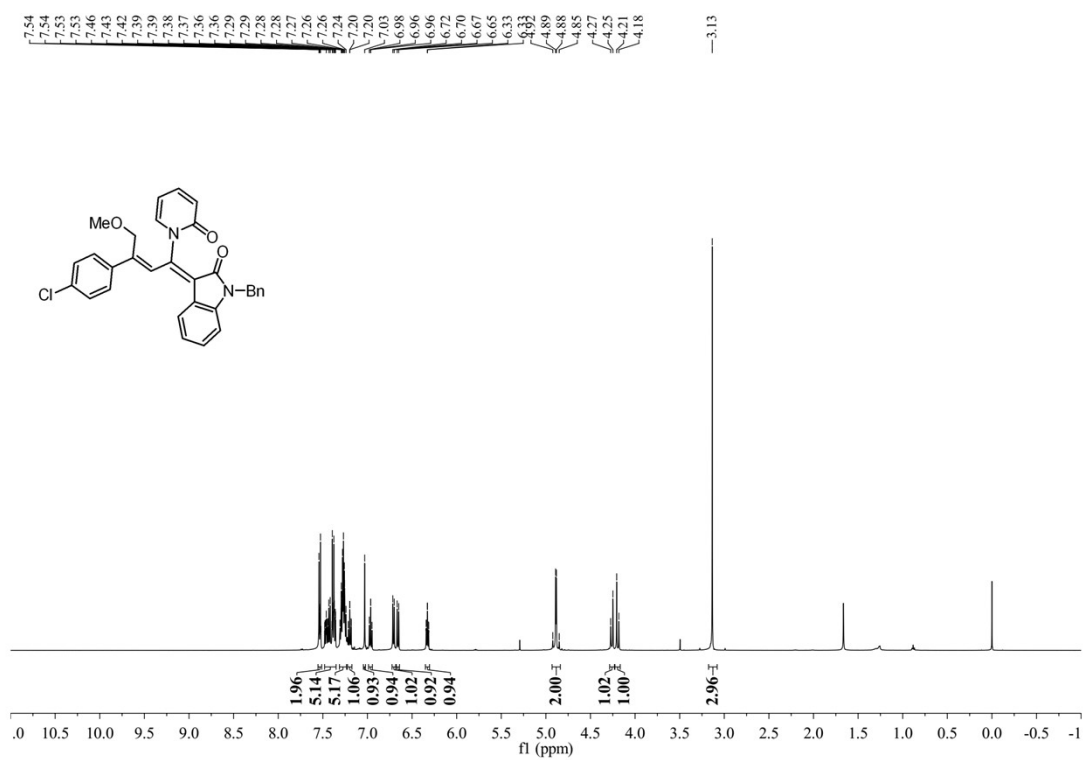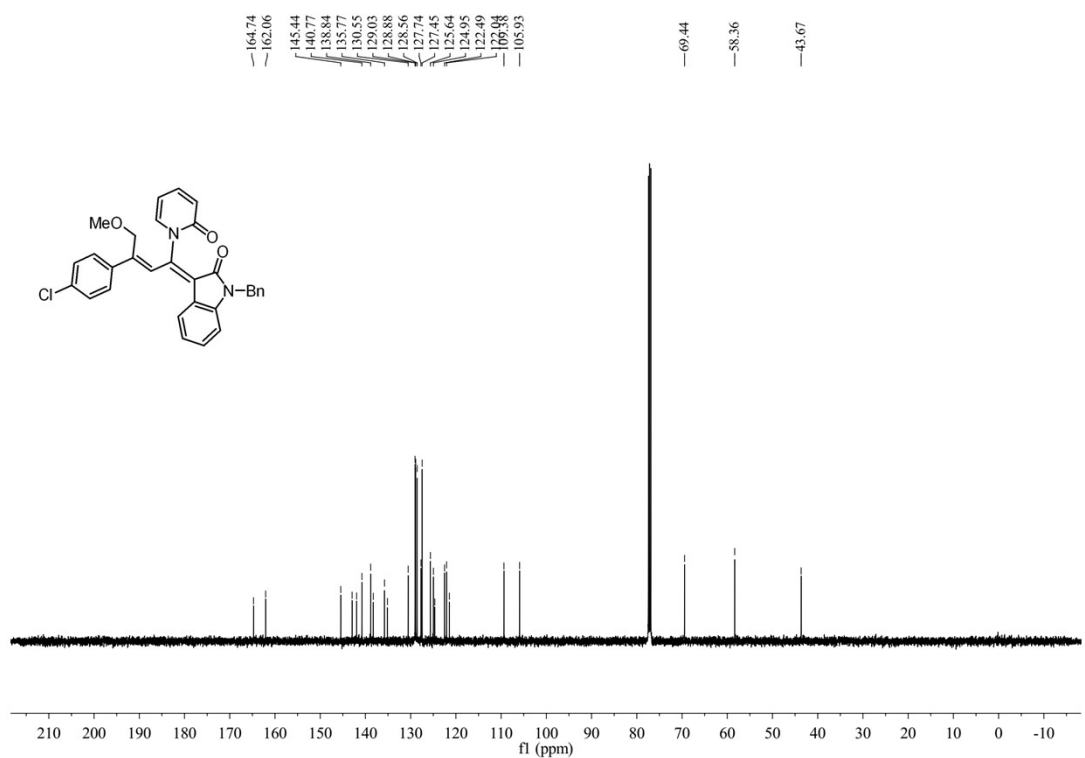



<sup>1</sup>H NMR (500 MHz, CDCl<sub>3</sub>) and <sup>13</sup>C NMR (125 MHz, CDCl<sub>3</sub>) spectra for 4ad

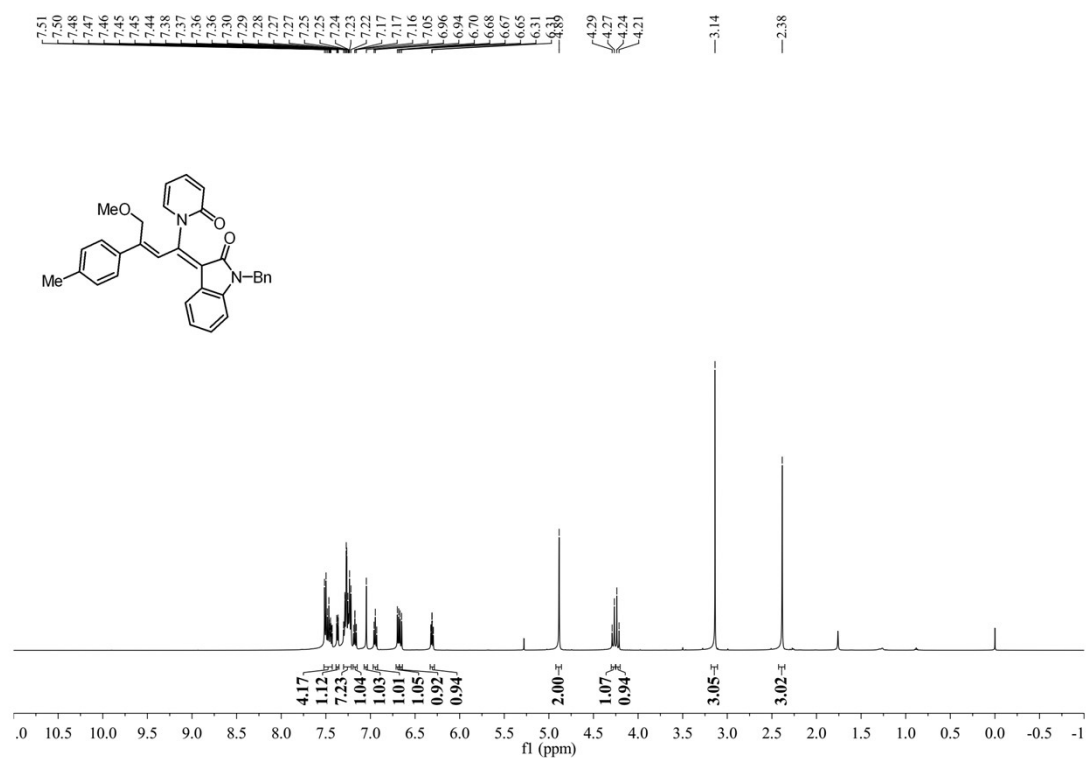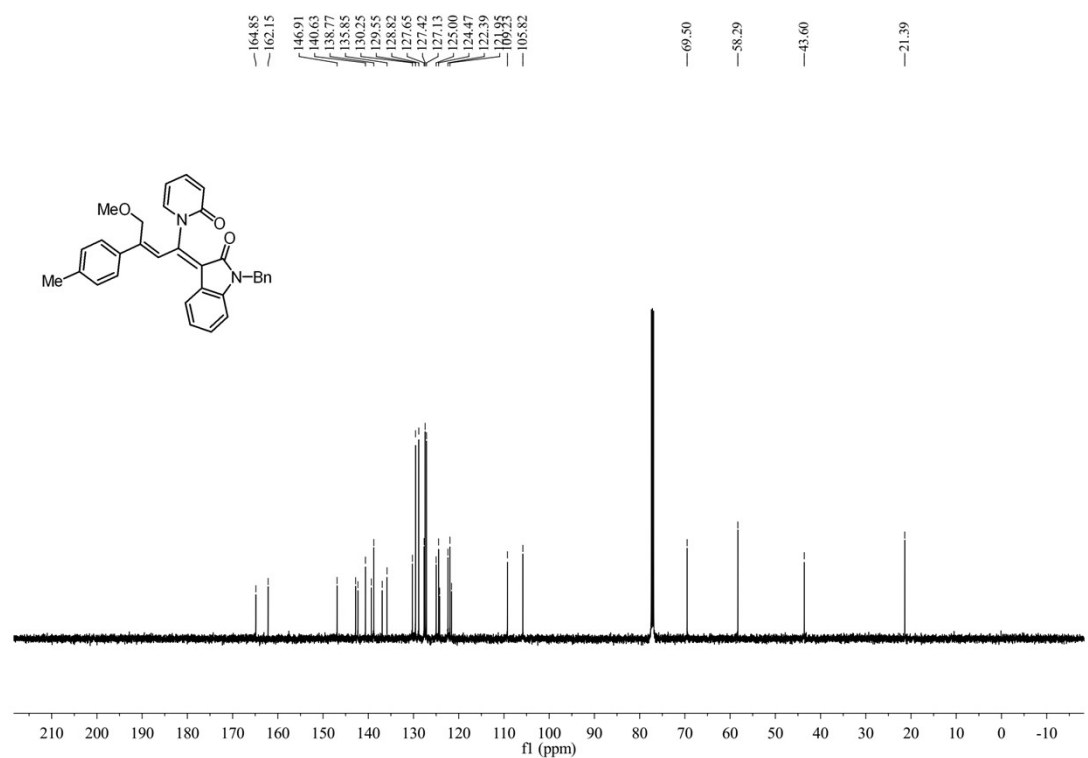



<sup>1</sup>H NMR (500 MHz, CDCl<sub>3</sub>) and <sup>13</sup>C NMR (125 MHz, CDCl<sub>3</sub>) spectra for 4ae

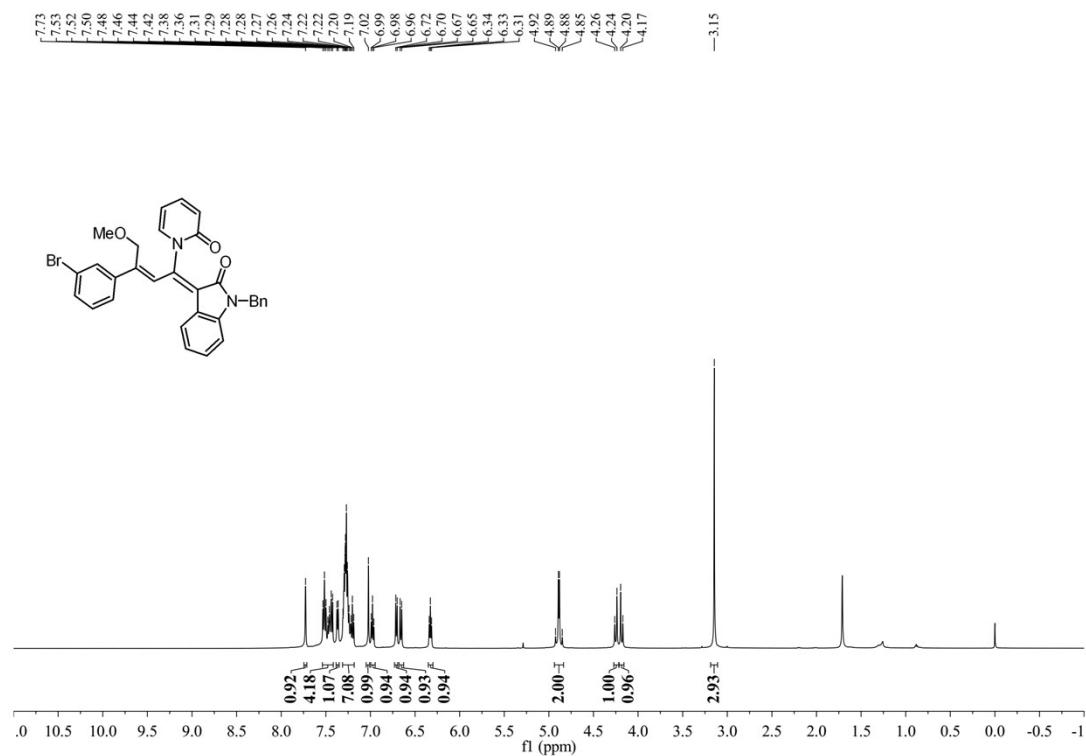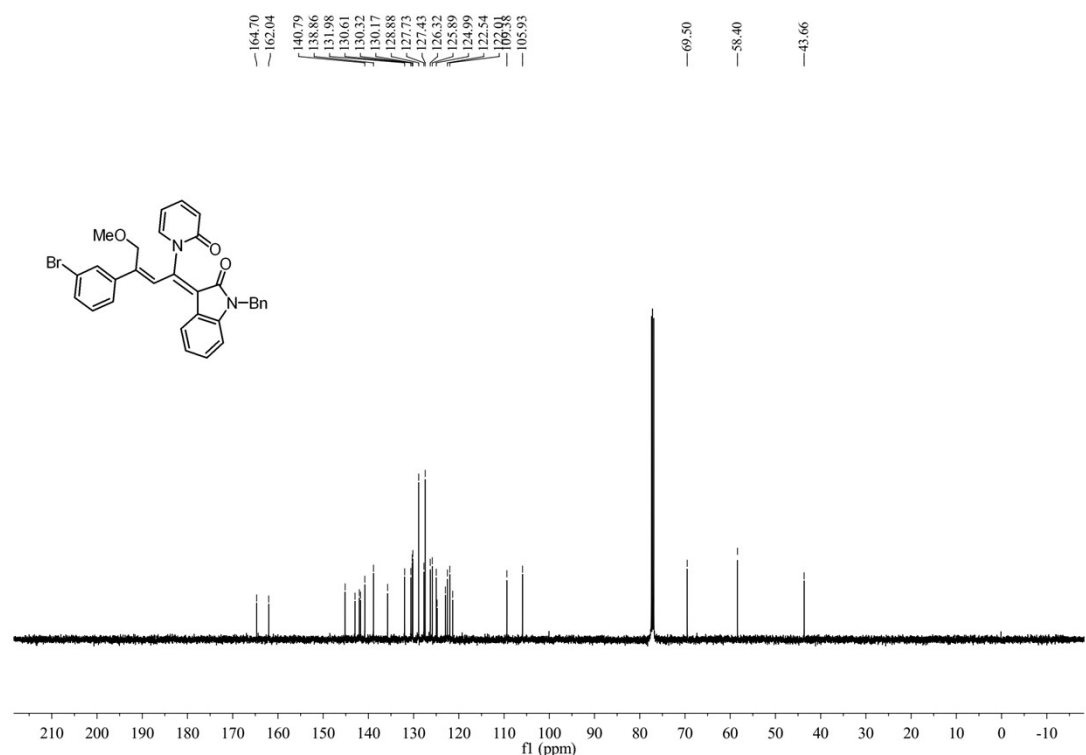

<sup>1</sup>H NMR (500 MHz, CDCl<sub>3</sub>) and <sup>13</sup>C NMR (125 MHz, CDCl<sub>3</sub>) spectra for 4af

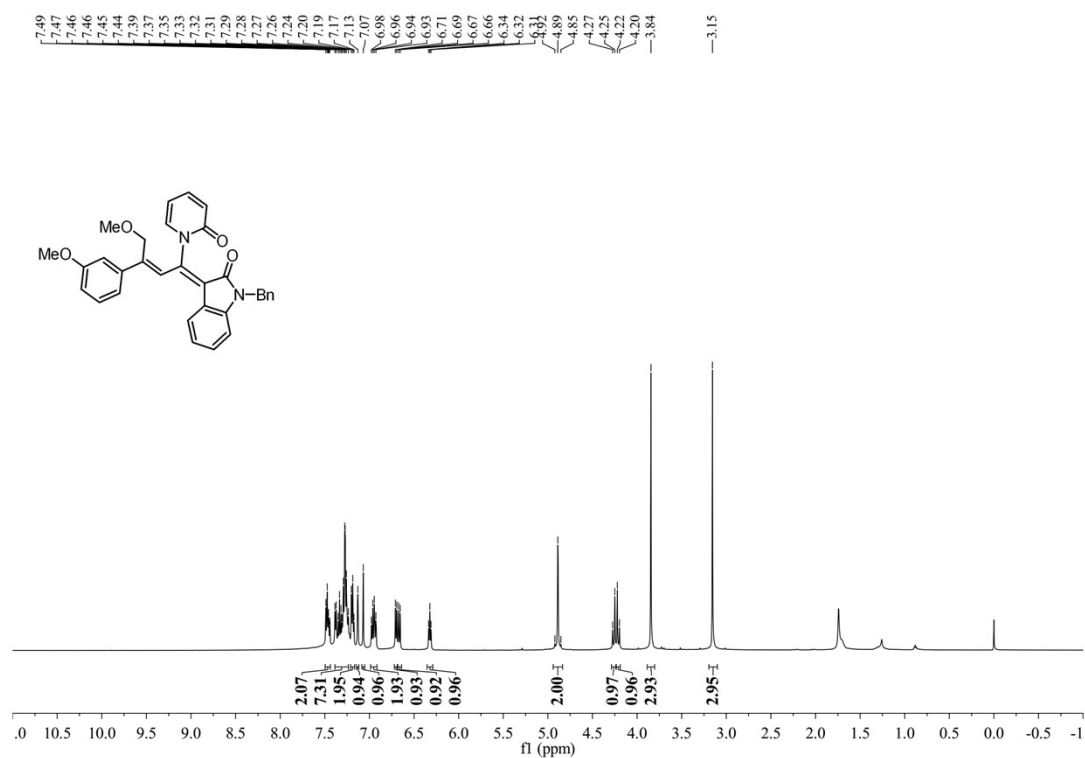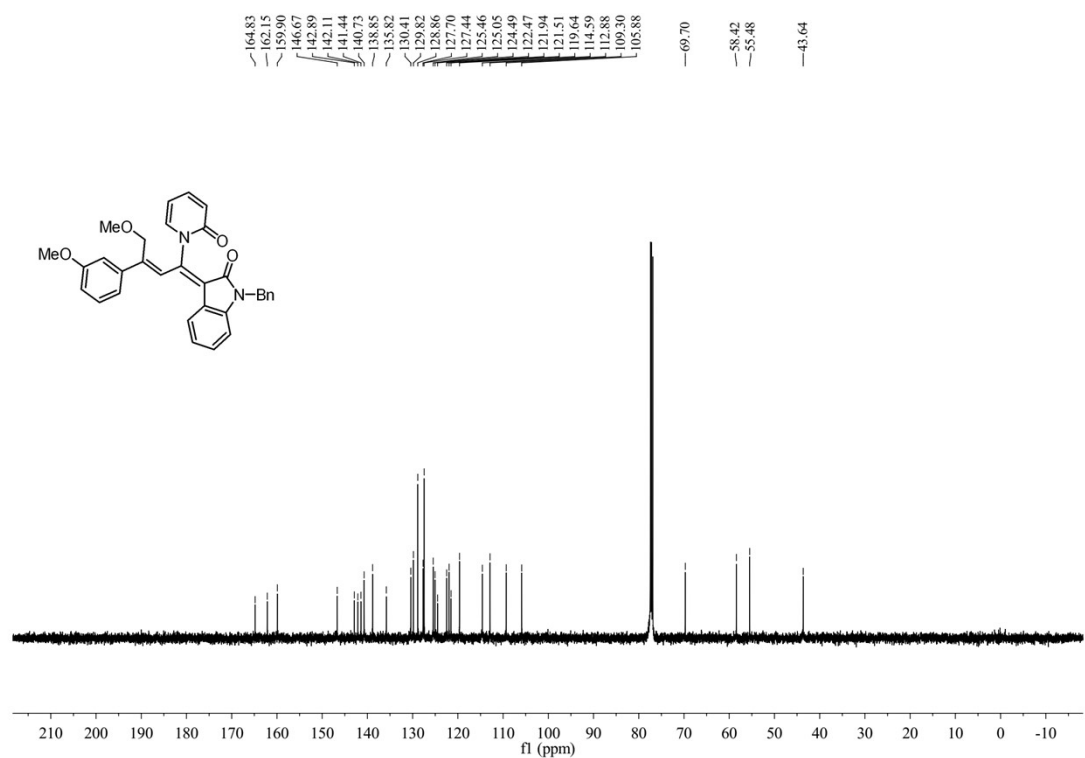

<sup>1</sup>H NMR (500 MHz, CDCl<sub>3</sub>) and <sup>13</sup>C NMR (125 MHz, CDCl<sub>3</sub>) spectra for 4ag

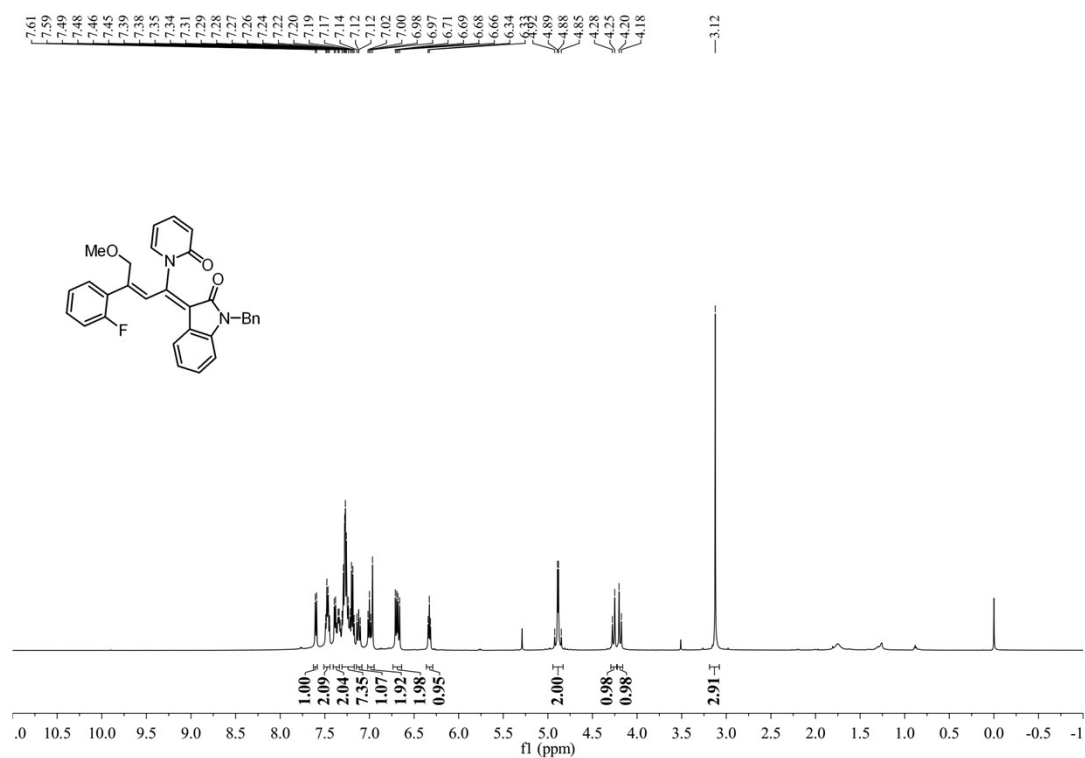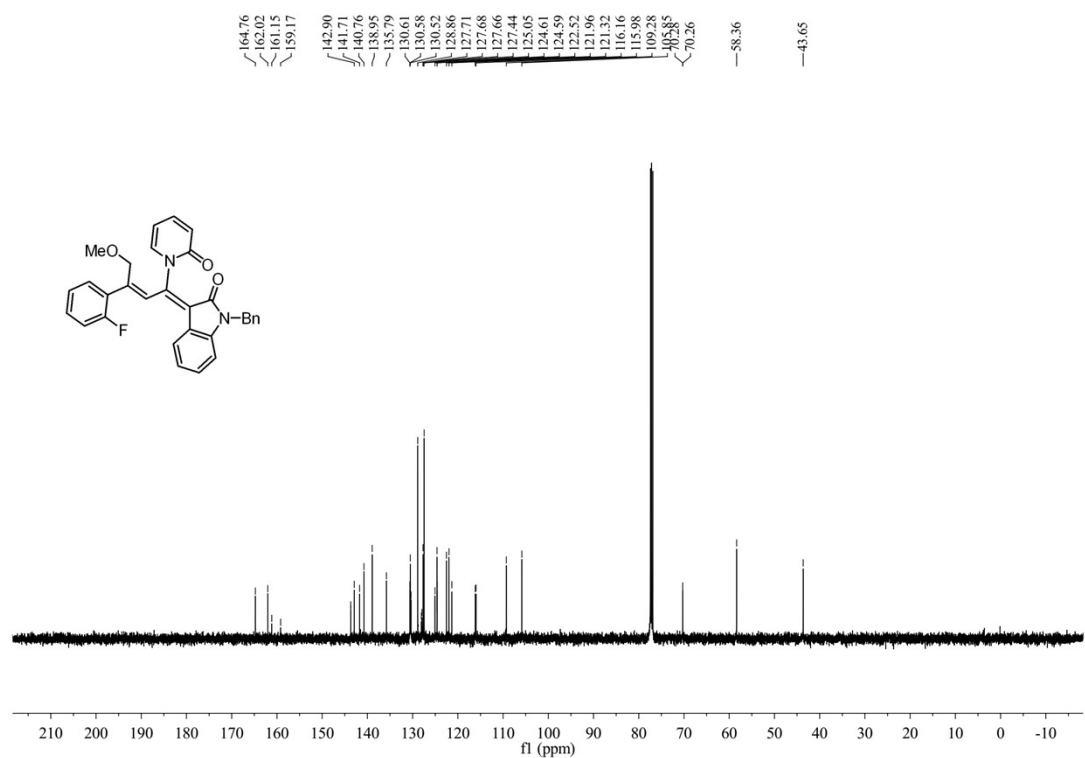

**<sup>19</sup>F NMR (376 MHz, CDCl<sub>3</sub>) spectra for 4ag**

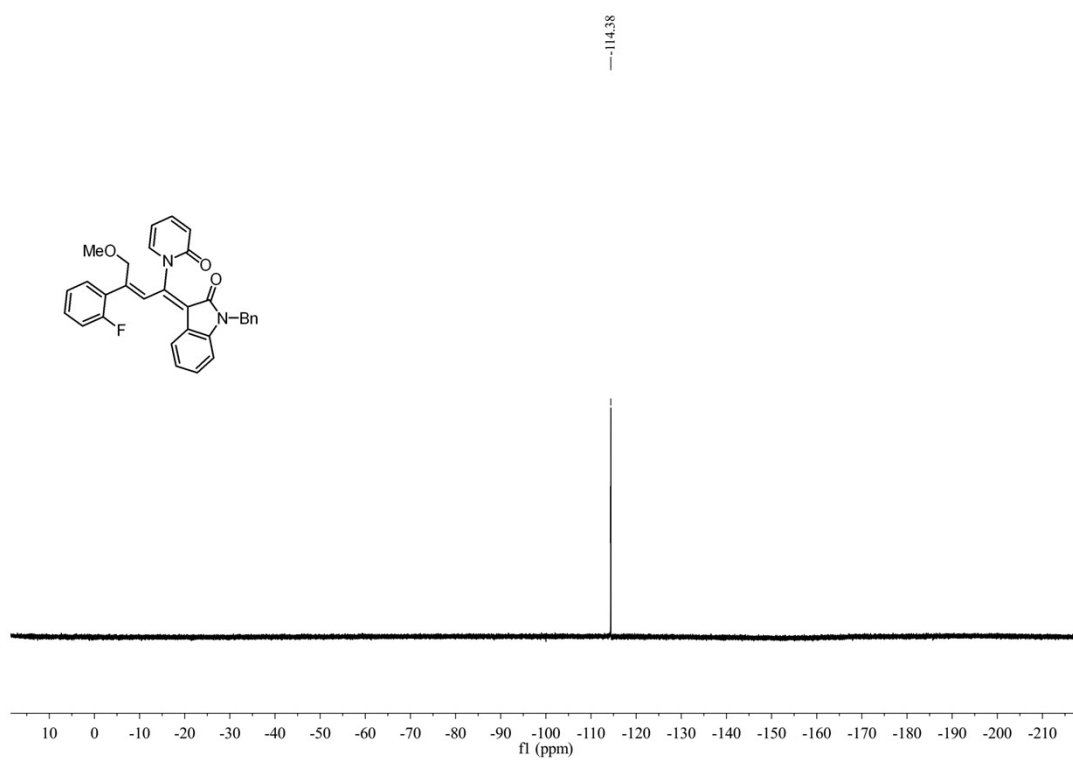

<sup>1</sup>H NMR (500 MHz, CDCl<sub>3</sub>) and <sup>13</sup>C NMR (125 MHz, CDCl<sub>3</sub>) spectra for 4ah

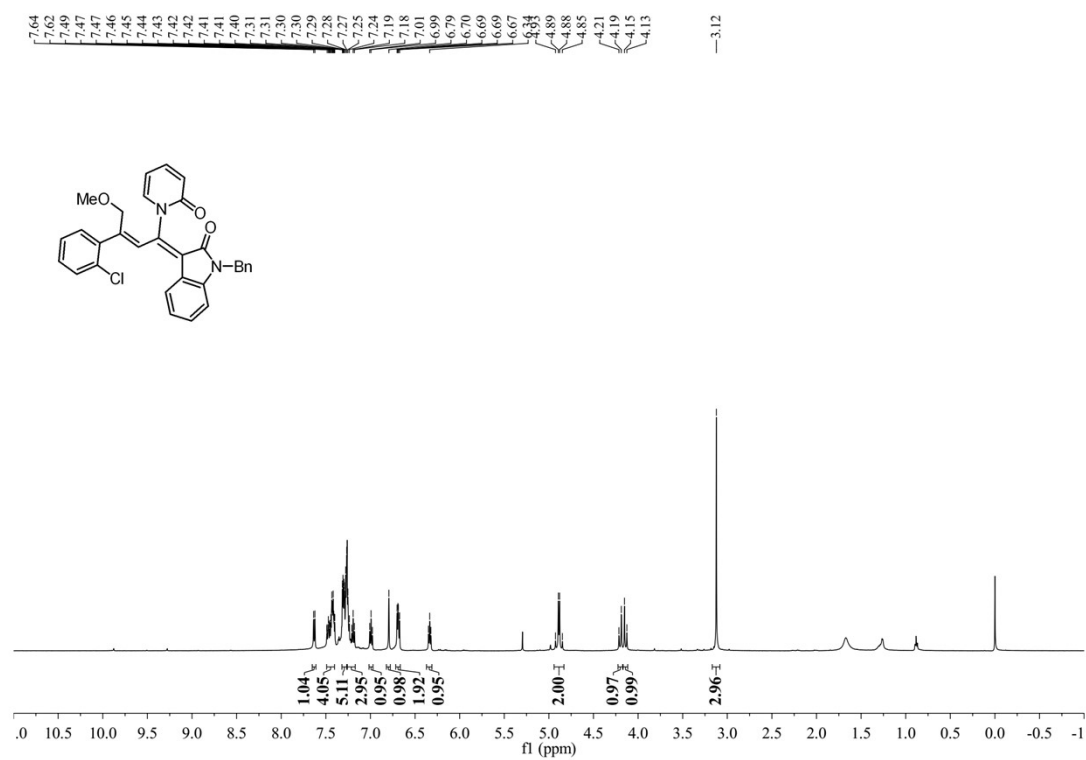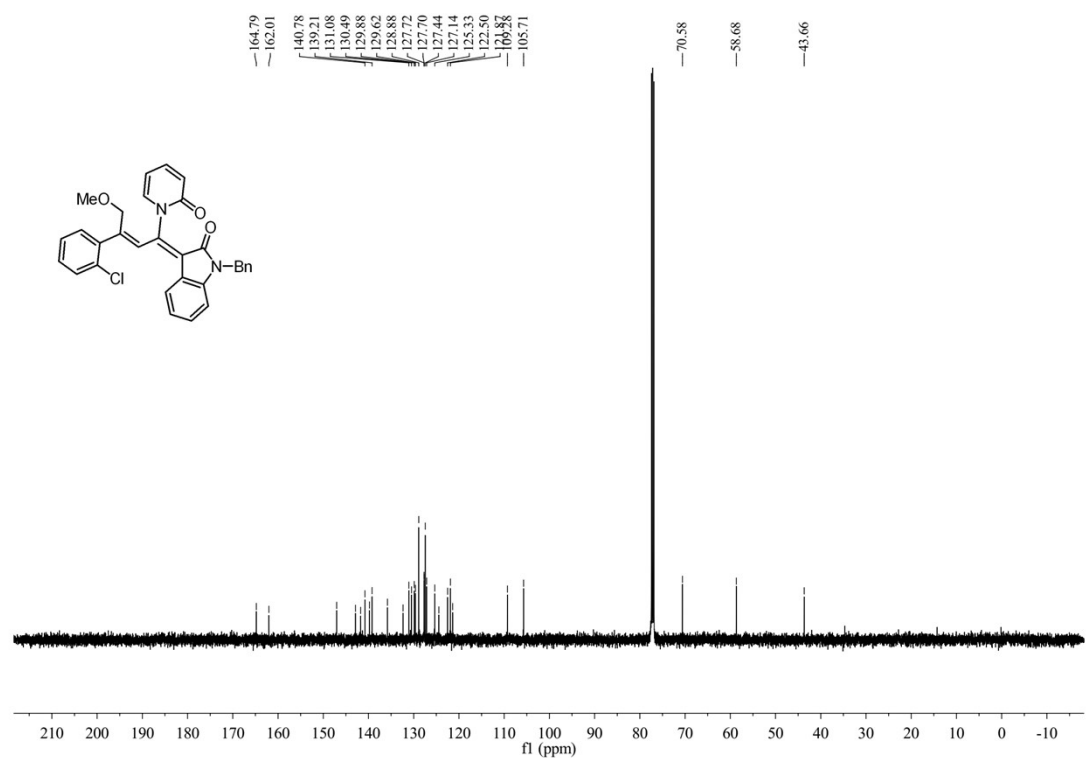

<sup>1</sup>H NMR (500 MHz, CDCl<sub>3</sub>) and <sup>13</sup>C NMR (125 MHz, CDCl<sub>3</sub>) spectra for 4ai

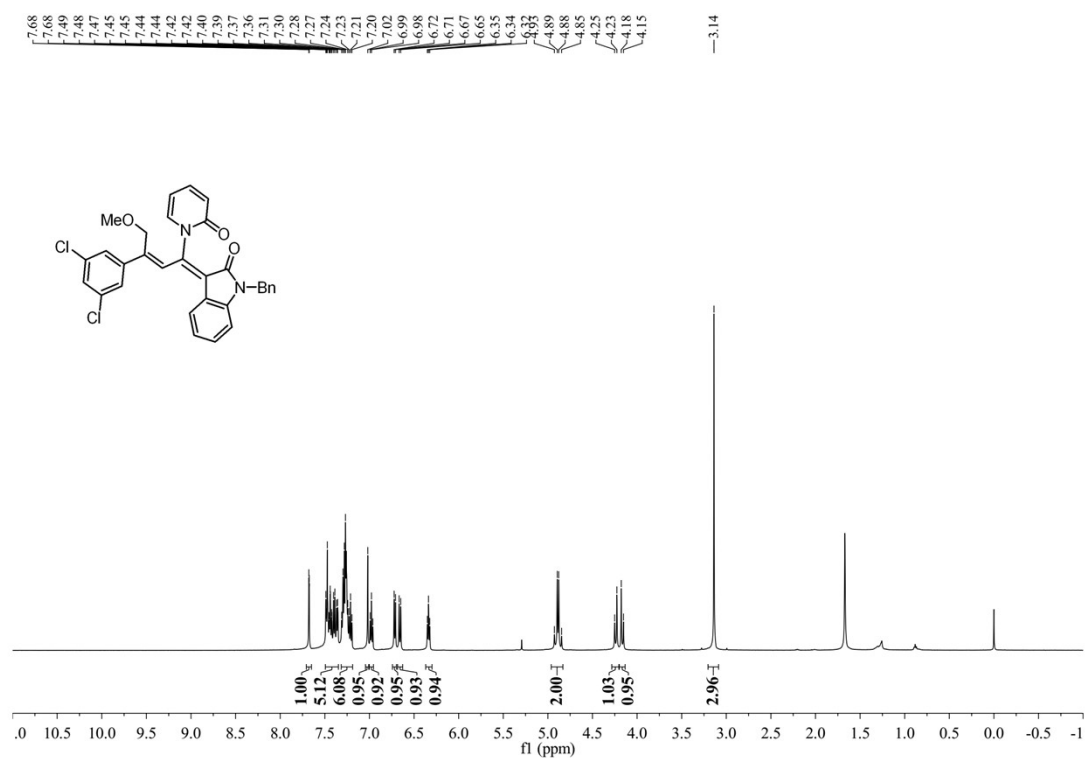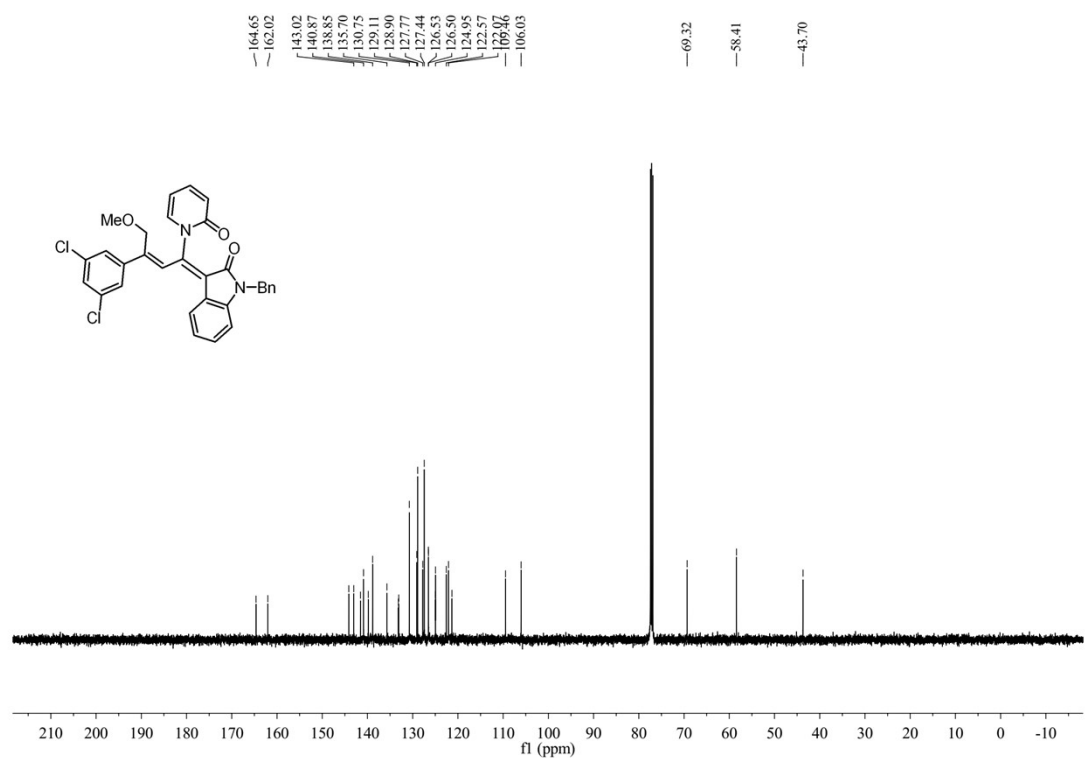

**<sup>1</sup>H NMR (500 MHz, CDCl<sub>3</sub>) and <sup>13</sup>C NMR (125 MHz, CDCl<sub>3</sub>) spectra for 4aj**

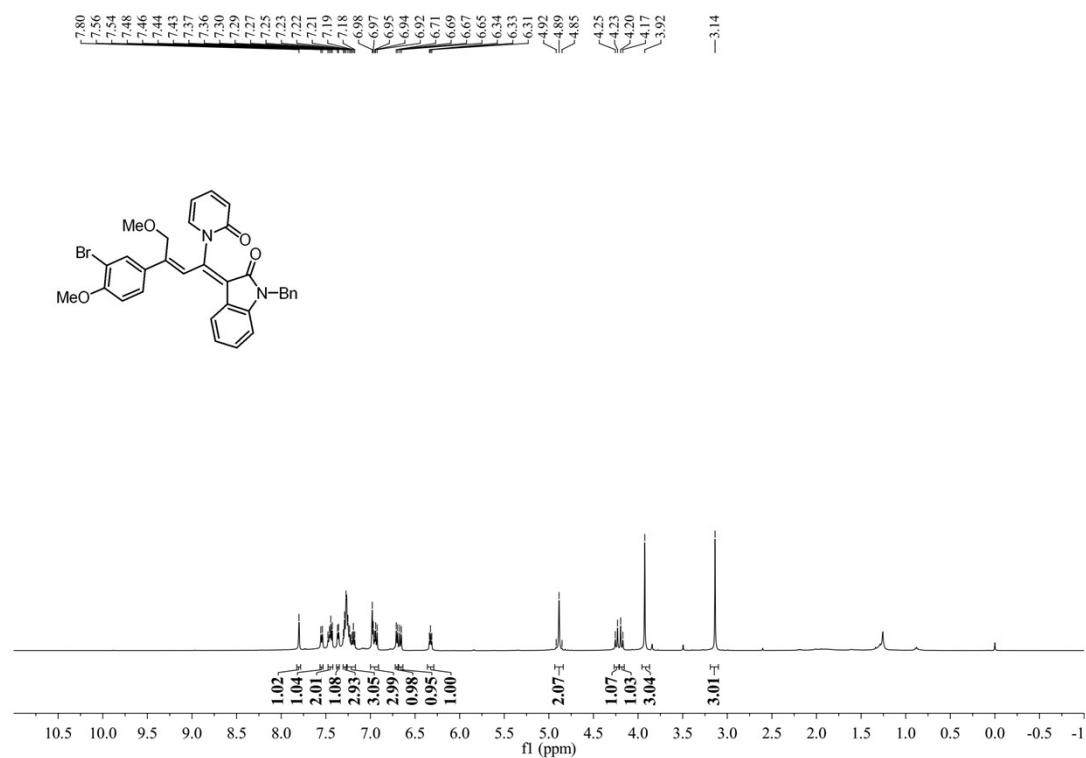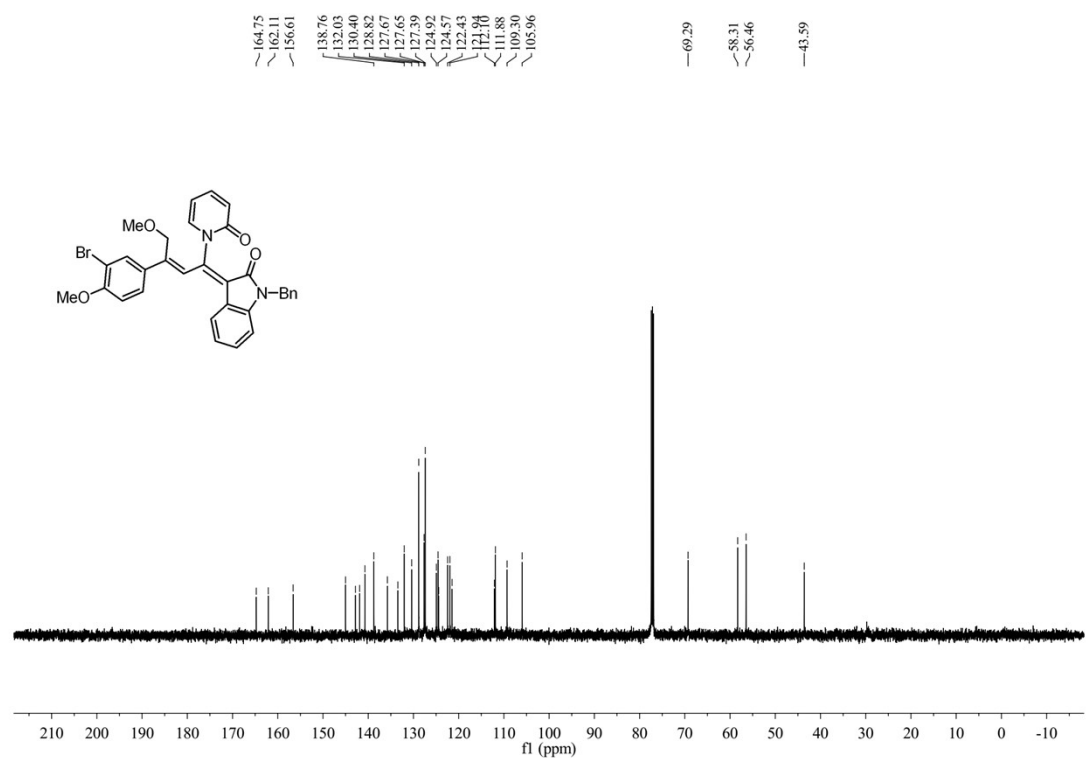

<sup>1</sup>H NMR (500 MHz, CDCl<sub>3</sub>) and <sup>13</sup>C NMR (125 MHz, CDCl<sub>3</sub>) spectra for 4ak

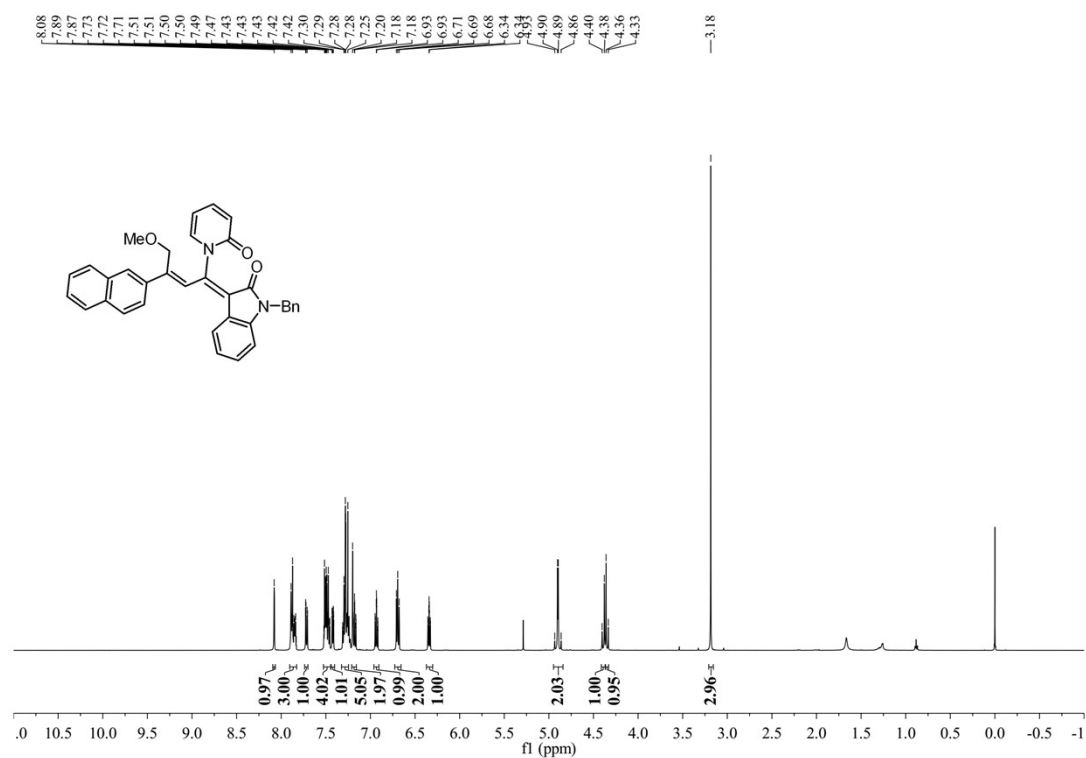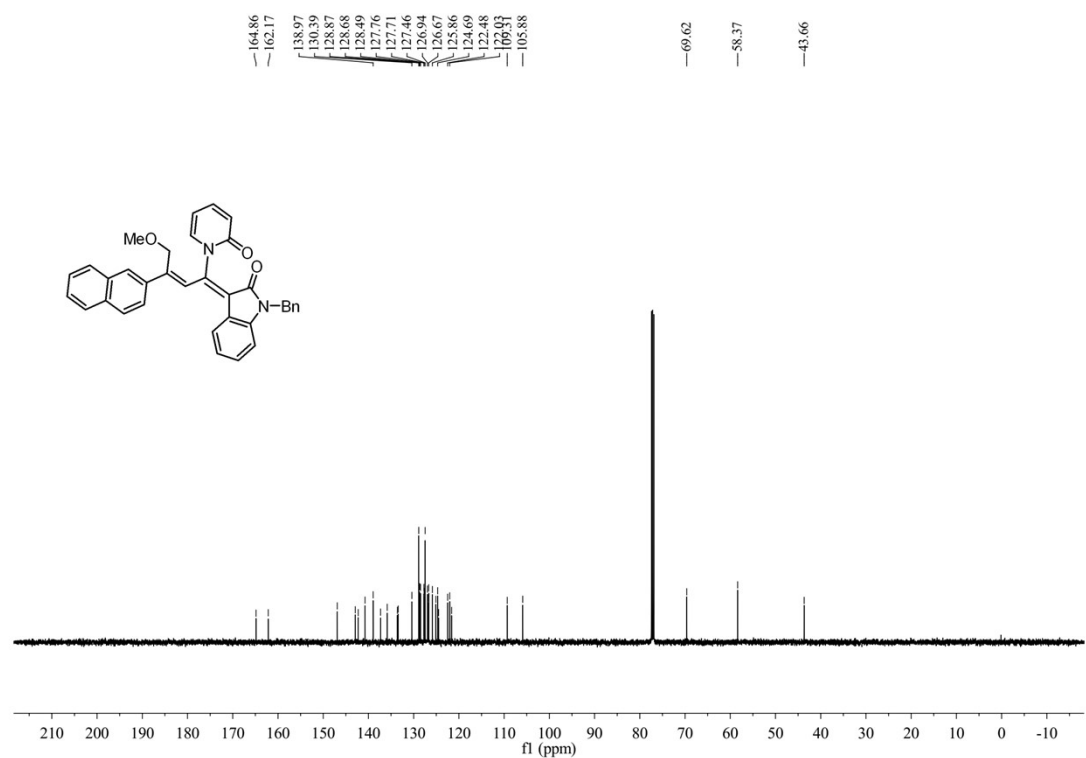



<sup>1</sup>H NMR (500 MHz, CDCl<sub>3</sub>) and <sup>13</sup>C NMR (125 MHz, CDCl<sub>3</sub>) spectra for 4al

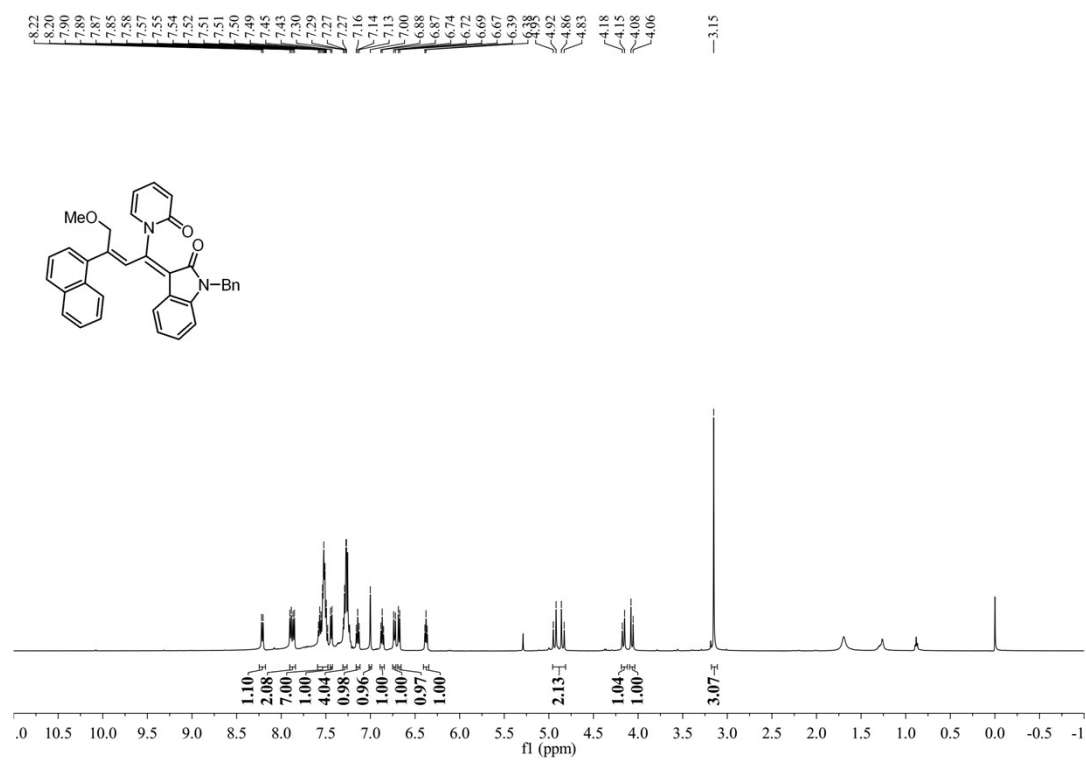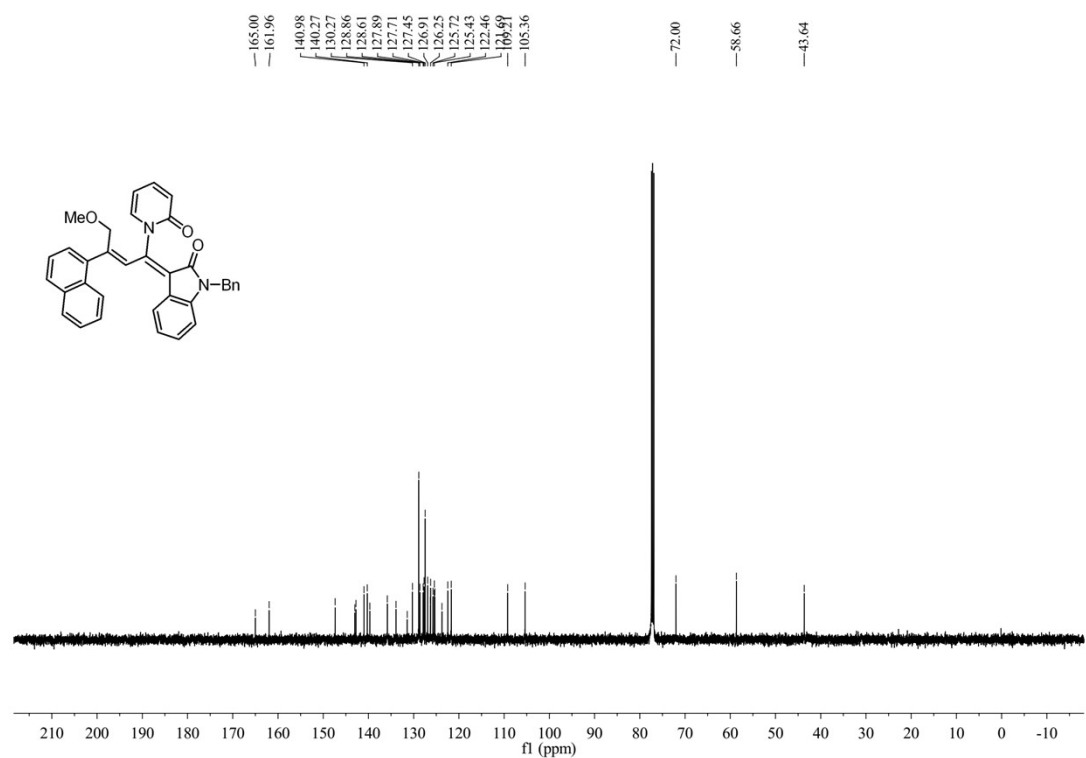

<sup>1</sup>H NMR (500 MHz, CDCl<sub>3</sub>) and <sup>13</sup>C NMR (125 MHz, CDCl<sub>3</sub>) spectra for 4am

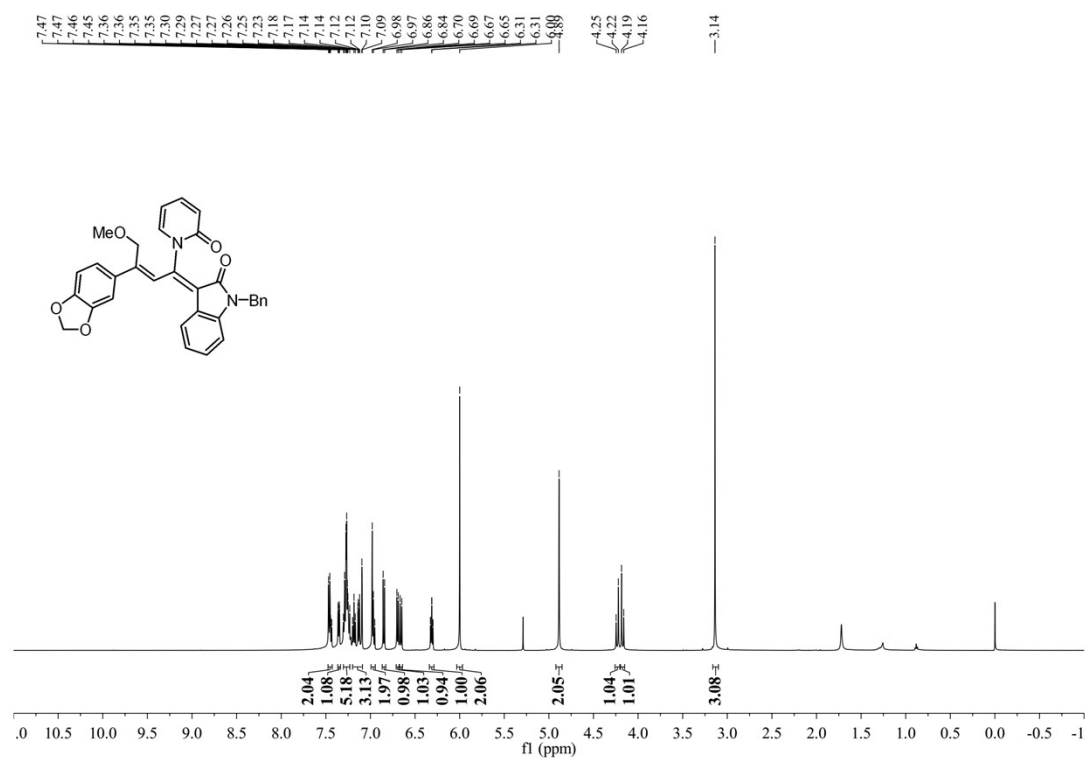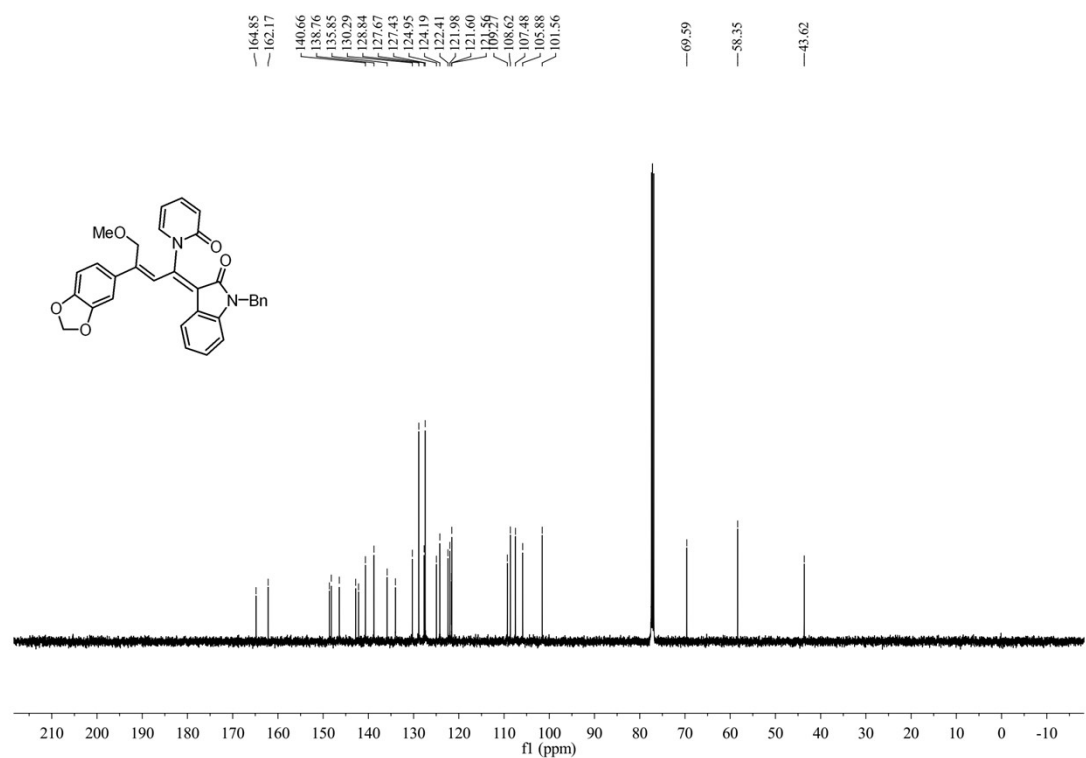

<sup>1</sup>H NMR (400 MHz, CDCl<sub>3</sub>) and <sup>13</sup>C NMR (125 MHz, CDCl<sub>3</sub>) spectra for 4an

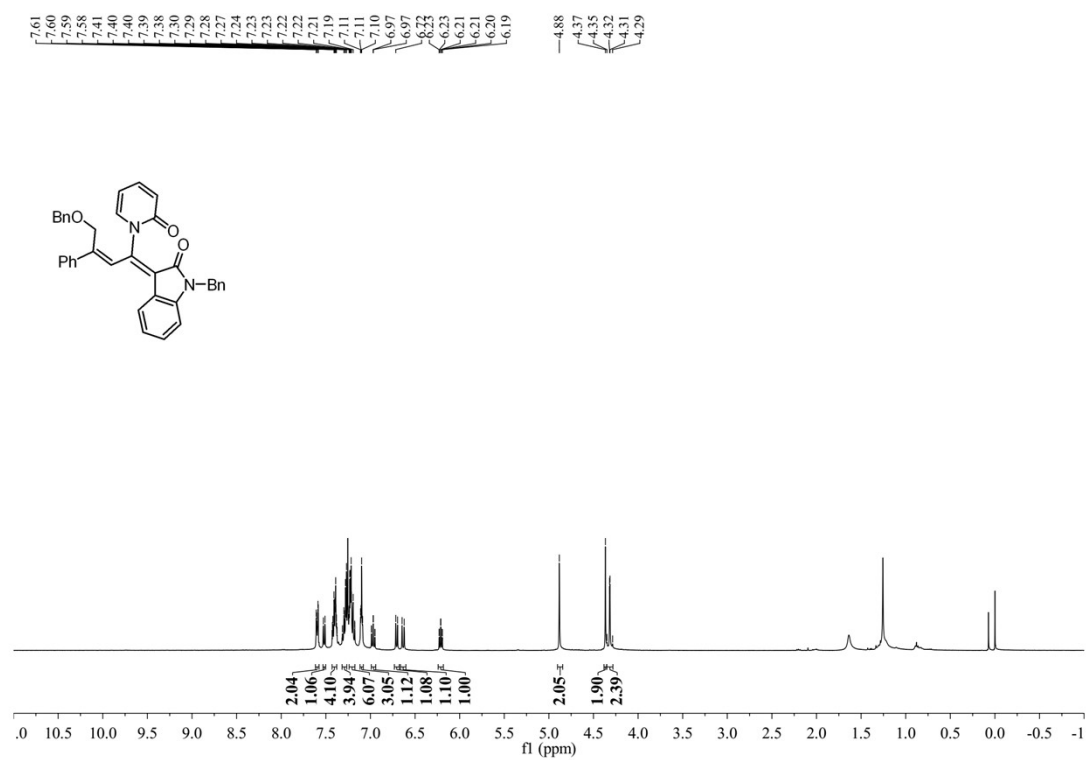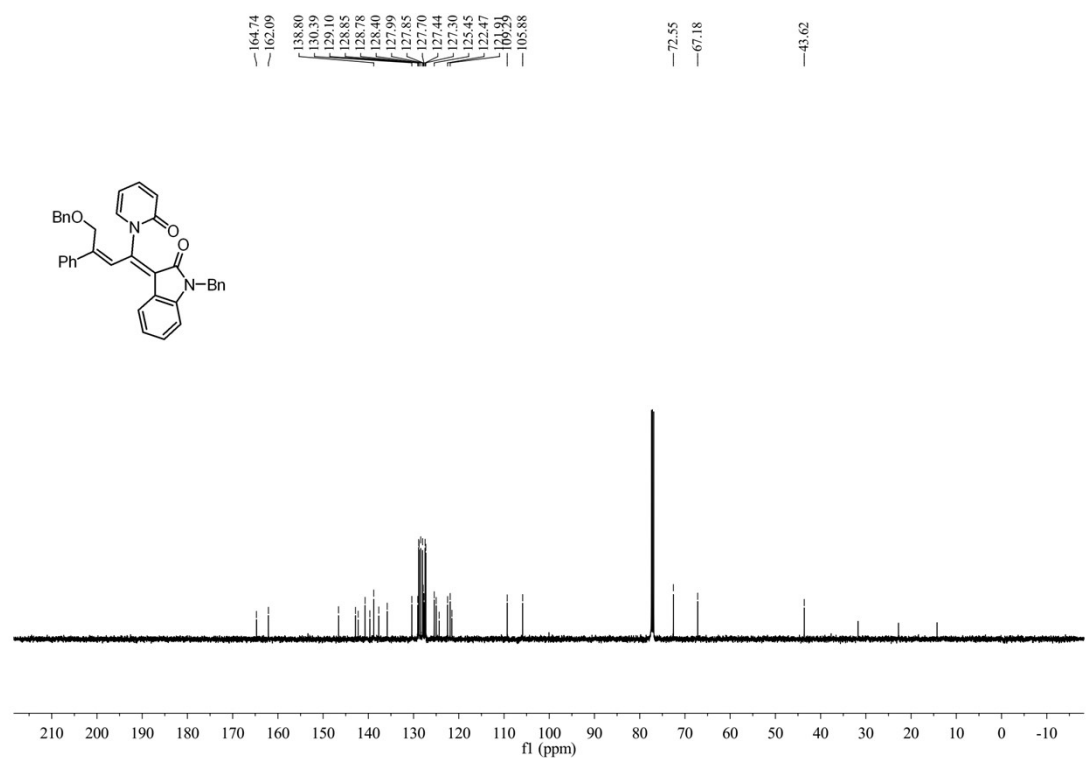

<sup>1</sup>H NMR (500 MHz, CDCl<sub>3</sub>) and <sup>13</sup>C NMR (125 MHz, CDCl<sub>3</sub>) spectra for 4ao

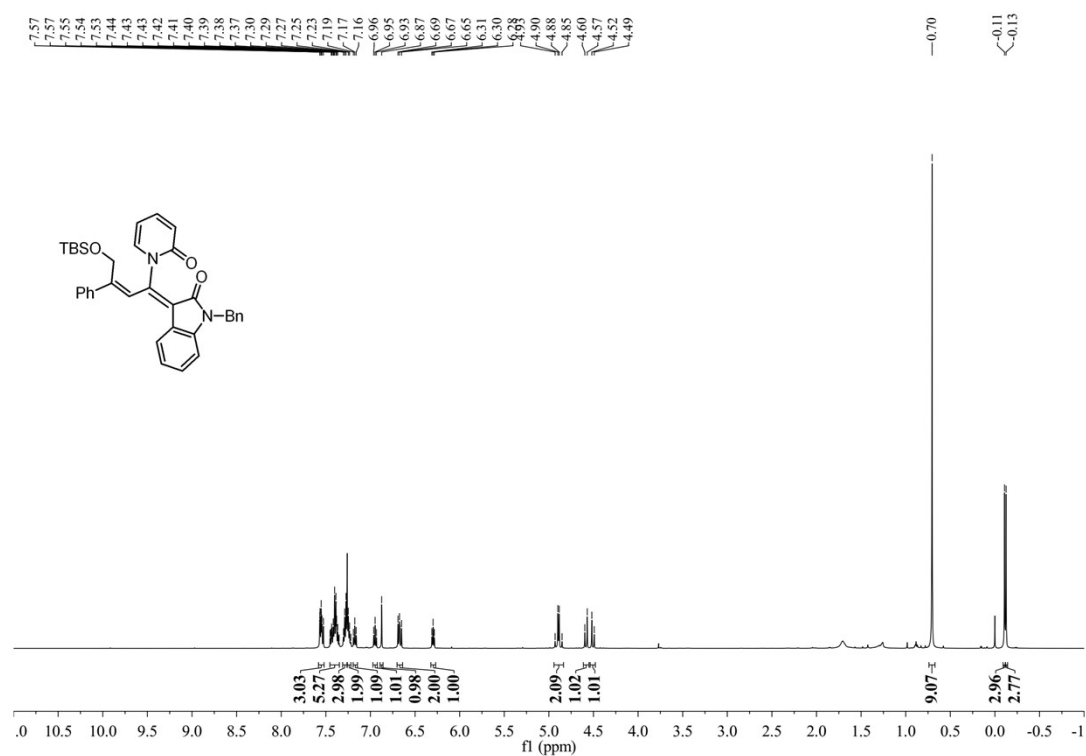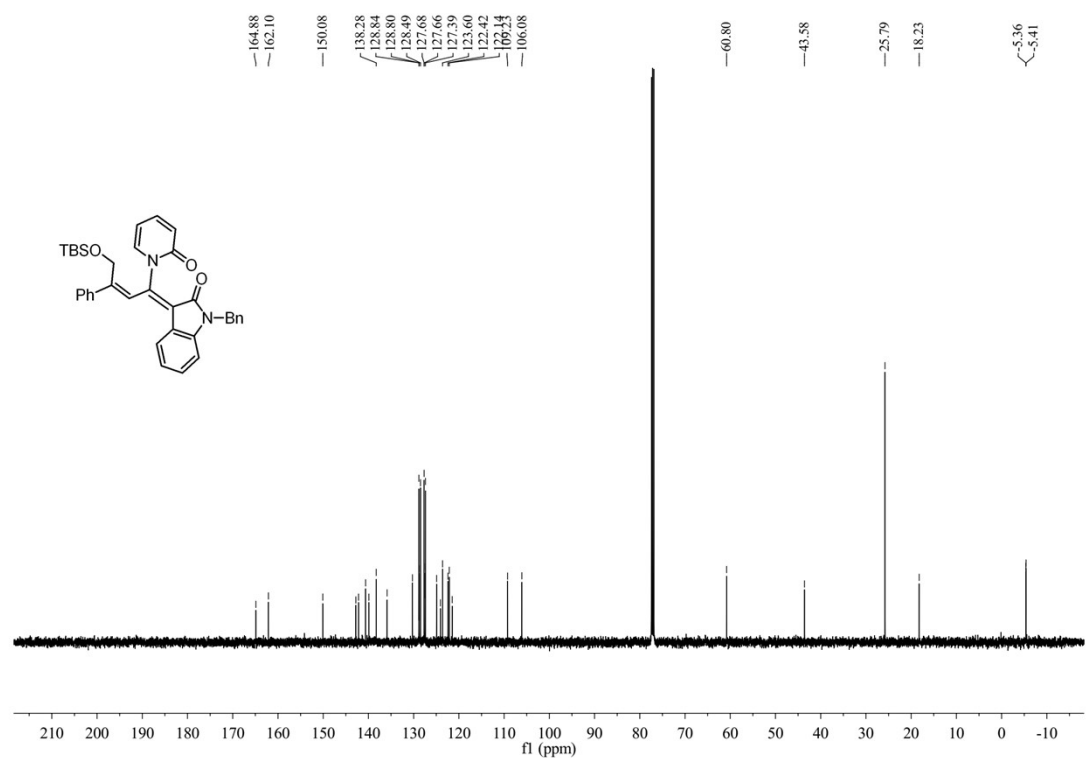

<sup>1</sup>H NMR (400 MHz, CDCl<sub>3</sub>) and <sup>13</sup>C NMR (100 MHz, CDCl<sub>3</sub>) spectra for 4ap

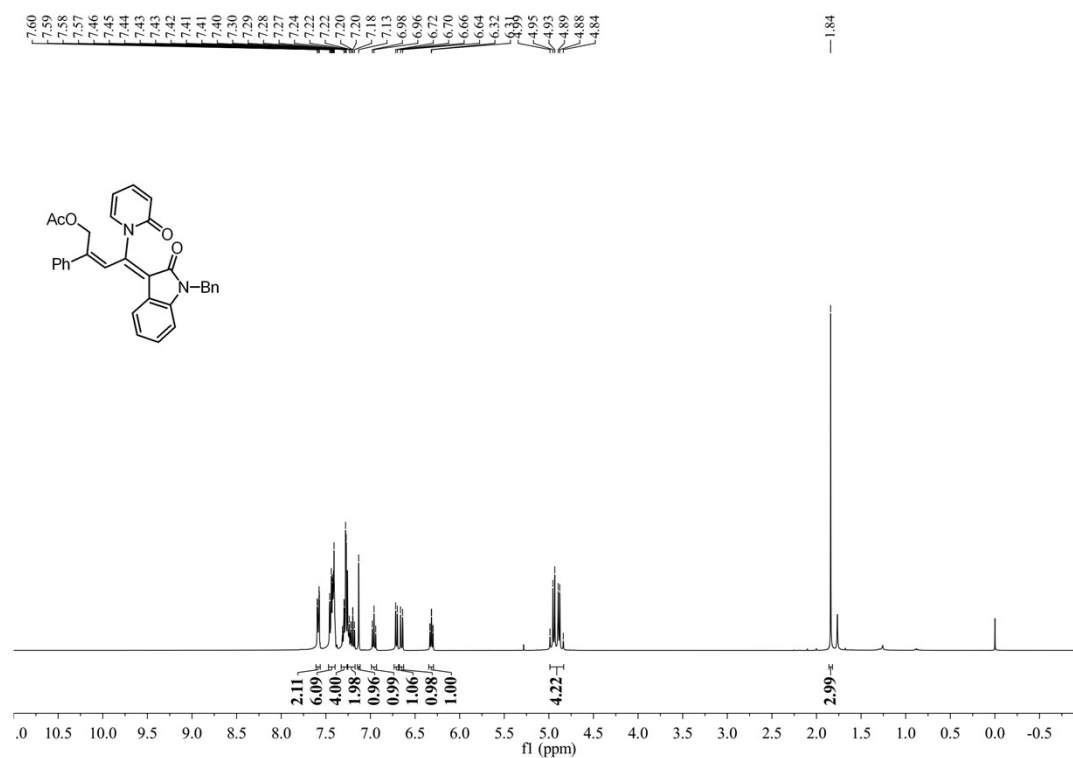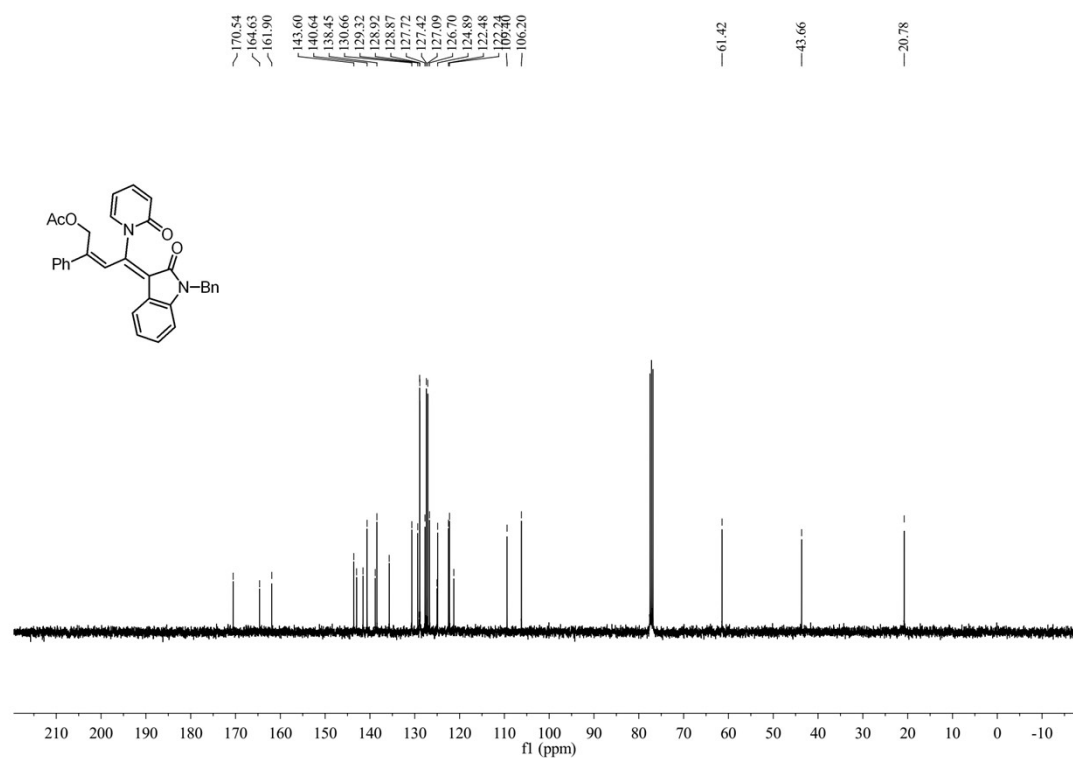

<sup>1</sup>H NMR (500 MHz, CDCl<sub>3</sub>) and <sup>13</sup>C NMR (125 MHz, CDCl<sub>3</sub>) spectra for 4aq

7.84  
7.83  
7.25  
7.15  
7.13  
7.01  
6.66  
6.64  
6.63  
6.35  
6.34  
5.69  
4.88  
4.85  
4.78  
4.75  
4.50  
4.47  
4.38  
4.34

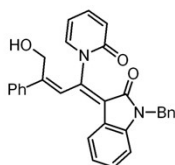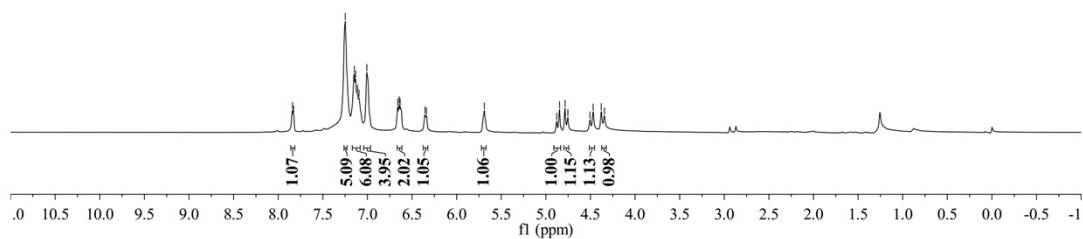

164.80  
161.76  
153.67  
139.03  
135.90  
130.01  
128.79  
128.44  
128.20  
127.66  
127.25  
125.25  
122.64  
121.19  
109.82  
105.67  
67.23  
43.52

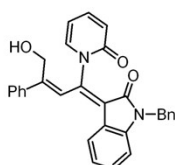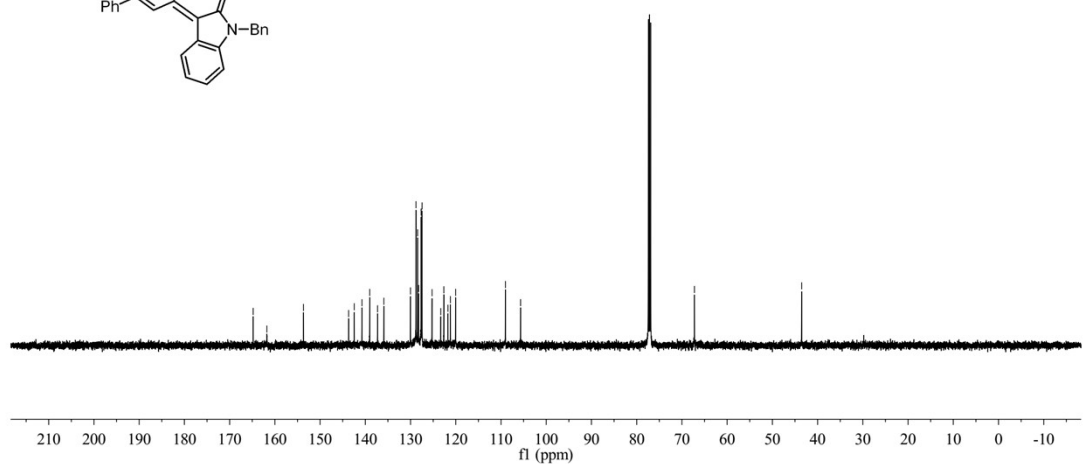

<sup>1</sup>H NMR (500 MHz, CDCl<sub>3</sub>) and <sup>13</sup>C NMR (125 MHz, CDCl<sub>3</sub>) spectra for 4ar

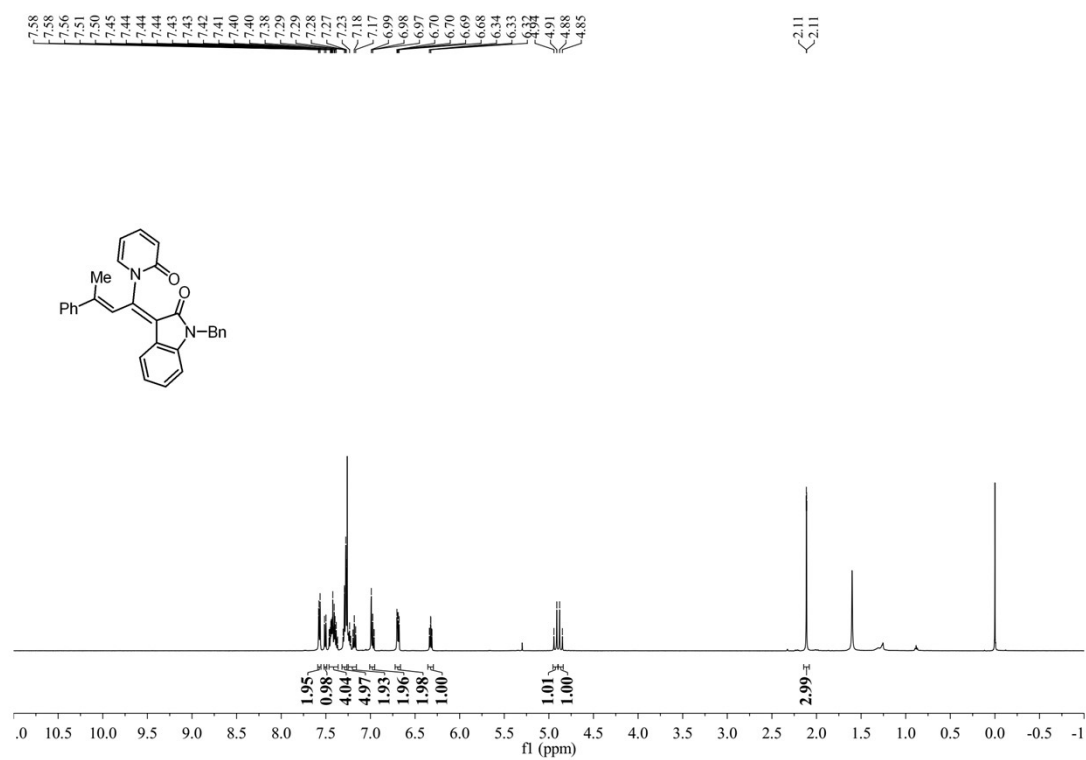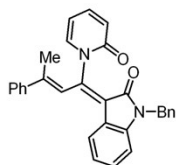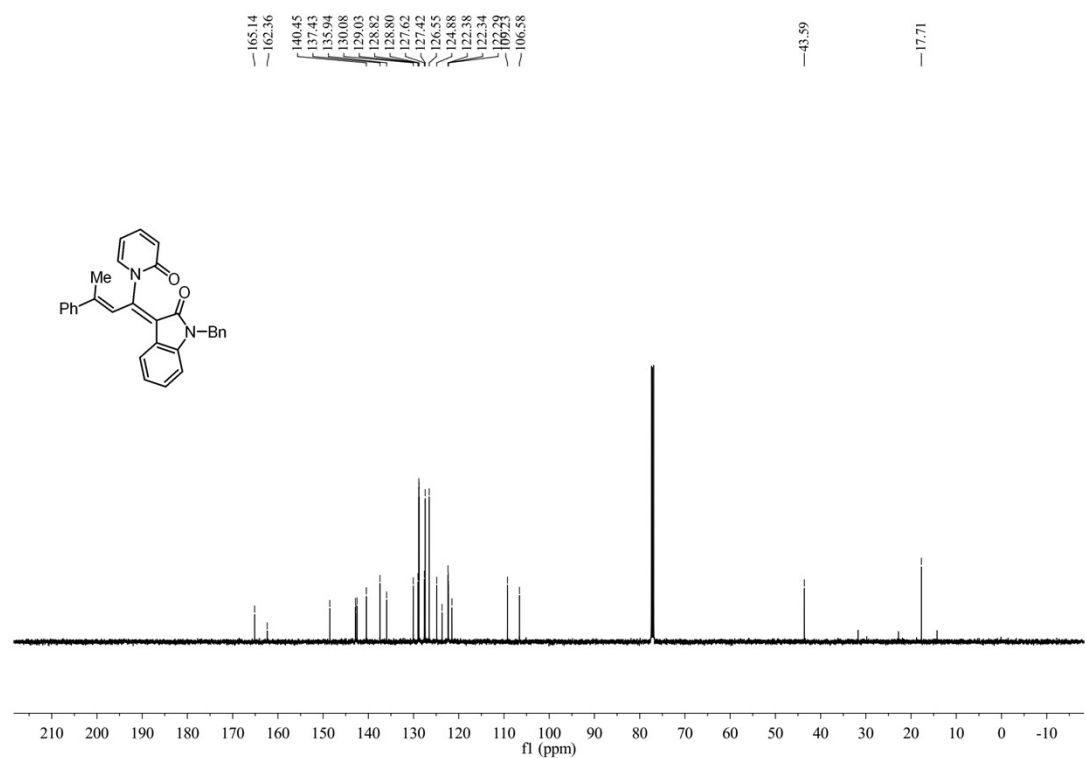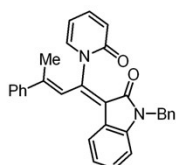

<sup>1</sup>H NMR (400 MHz, CDCl<sub>3</sub>) and <sup>13</sup>C NMR (100 MHz, CDCl<sub>3</sub>) spectra for 4as

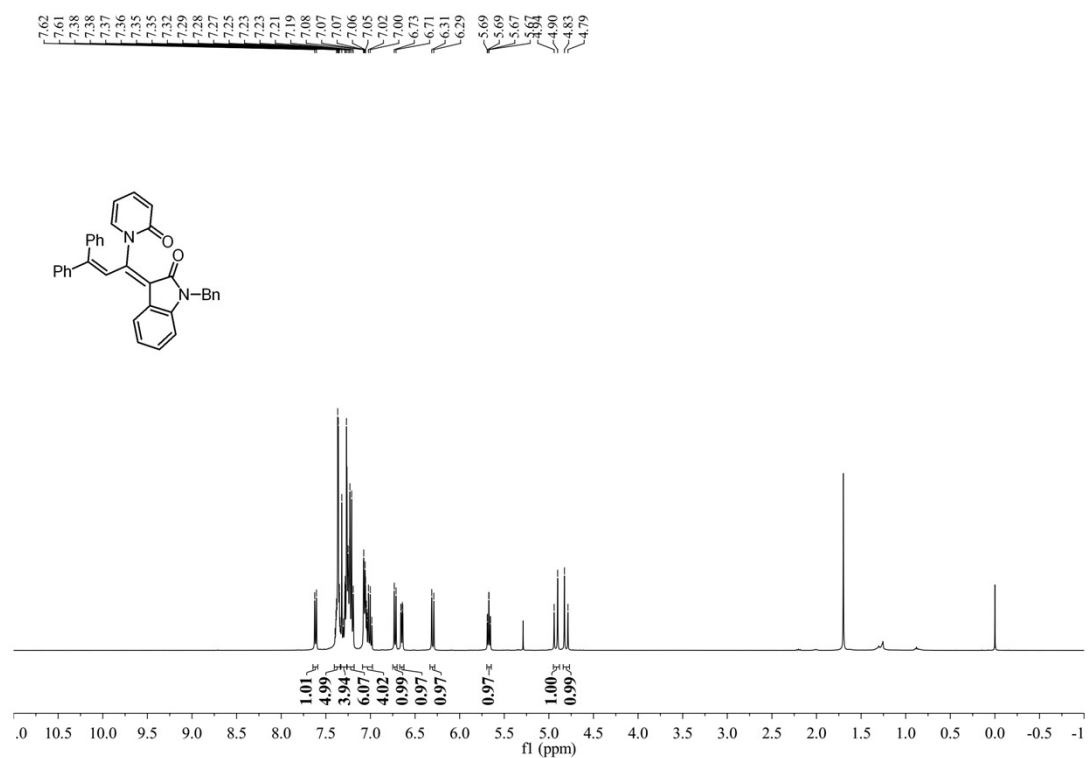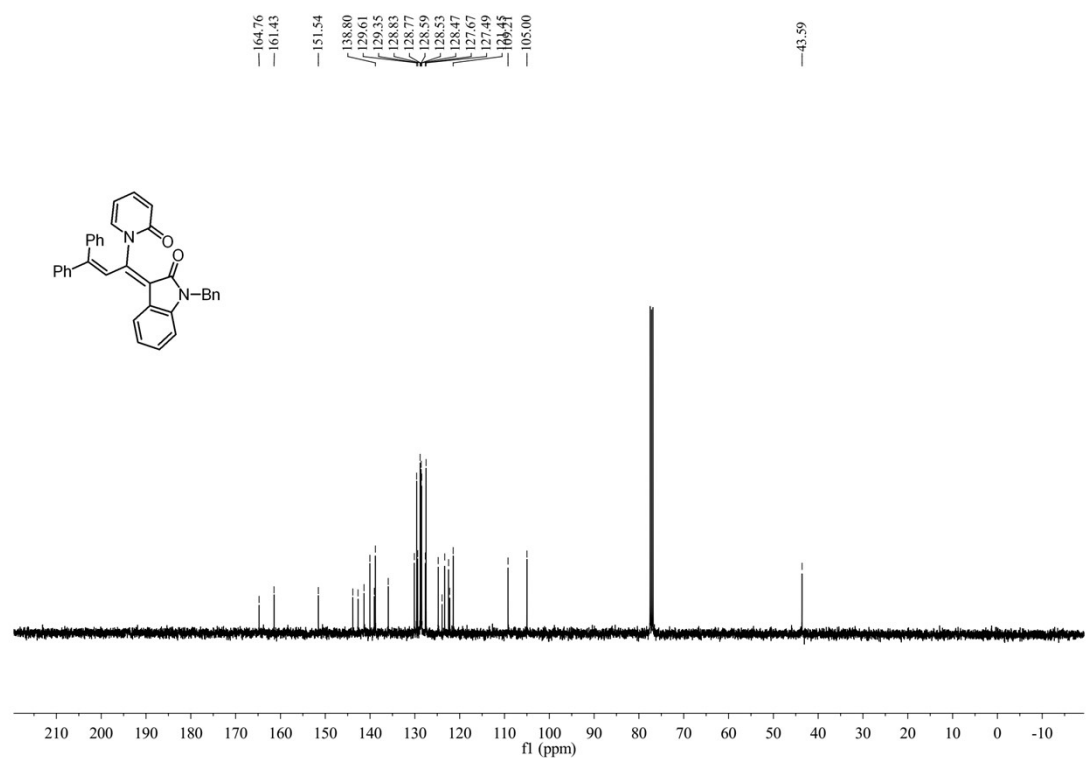



<sup>1</sup>H NMR (500 MHz, CDCl<sub>3</sub>) and <sup>13</sup>C NMR (125 MHz, CDCl<sub>3</sub>) spectra for 4at

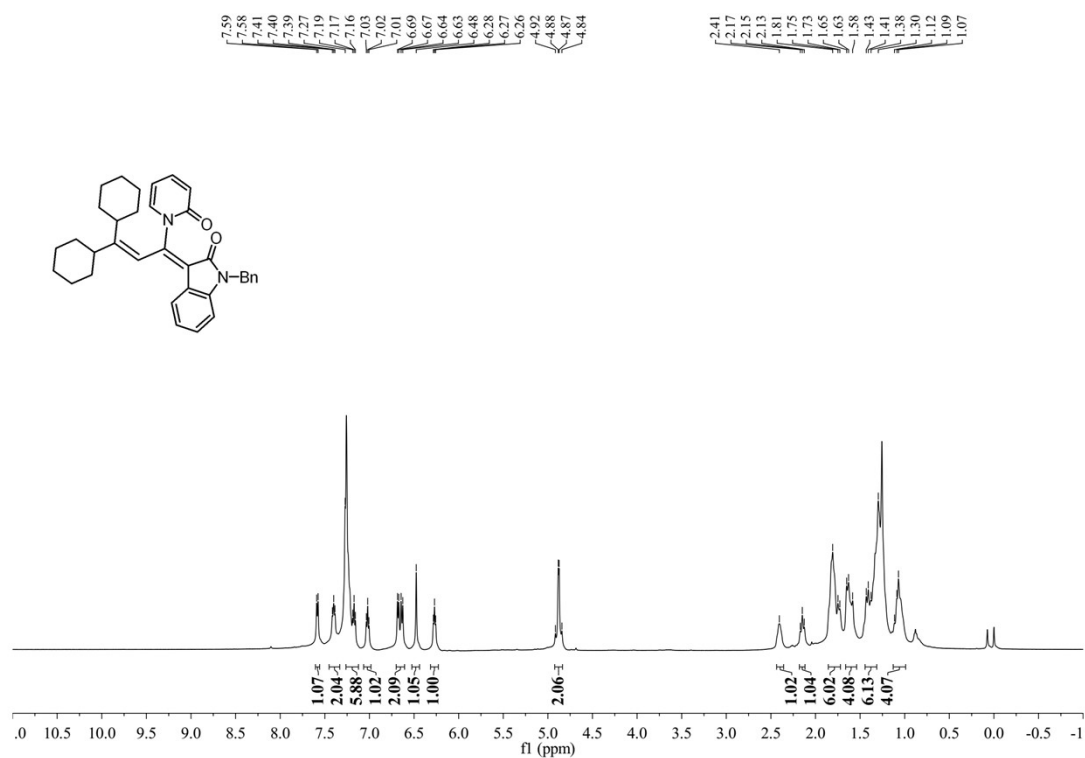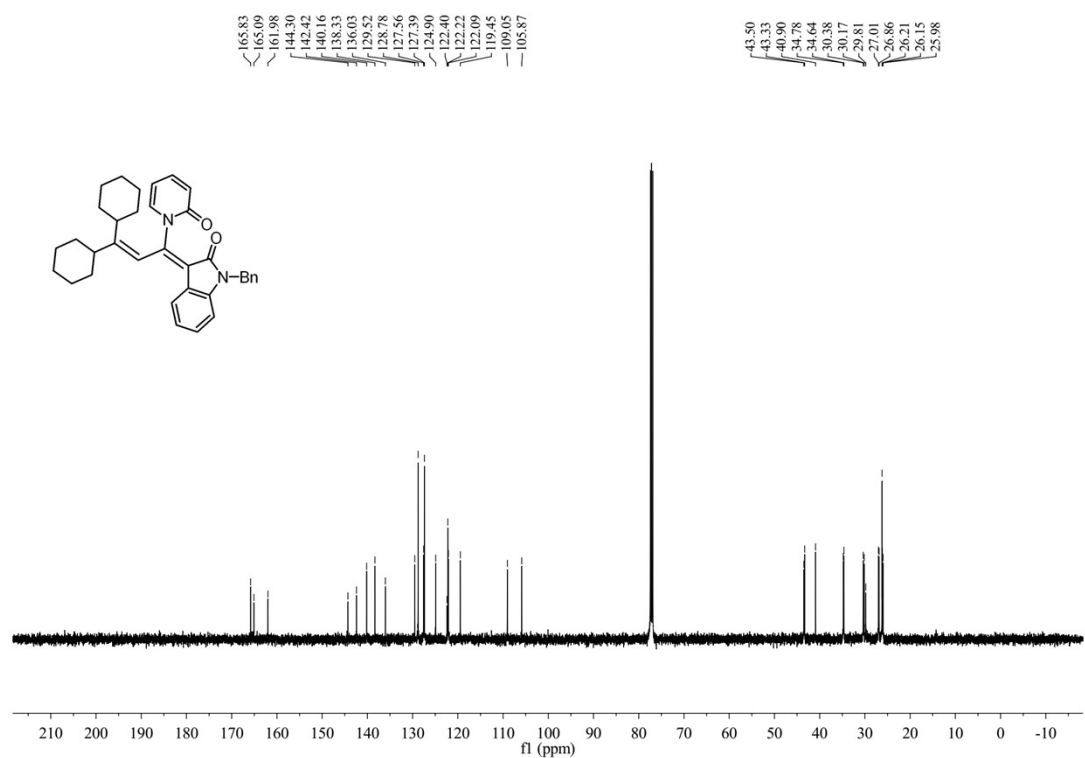

<sup>1</sup>H NMR (500 MHz, CDCl<sub>3</sub>) and <sup>13</sup>C NMR (125 MHz, CDCl<sub>3</sub>) spectra for 4au

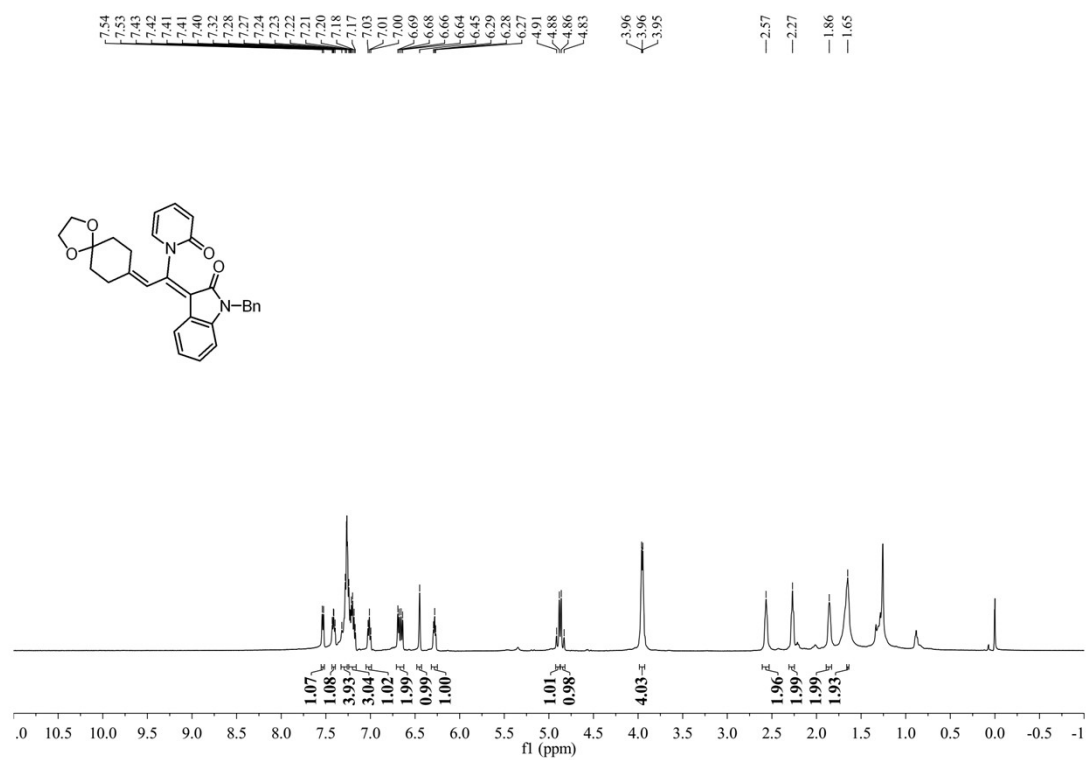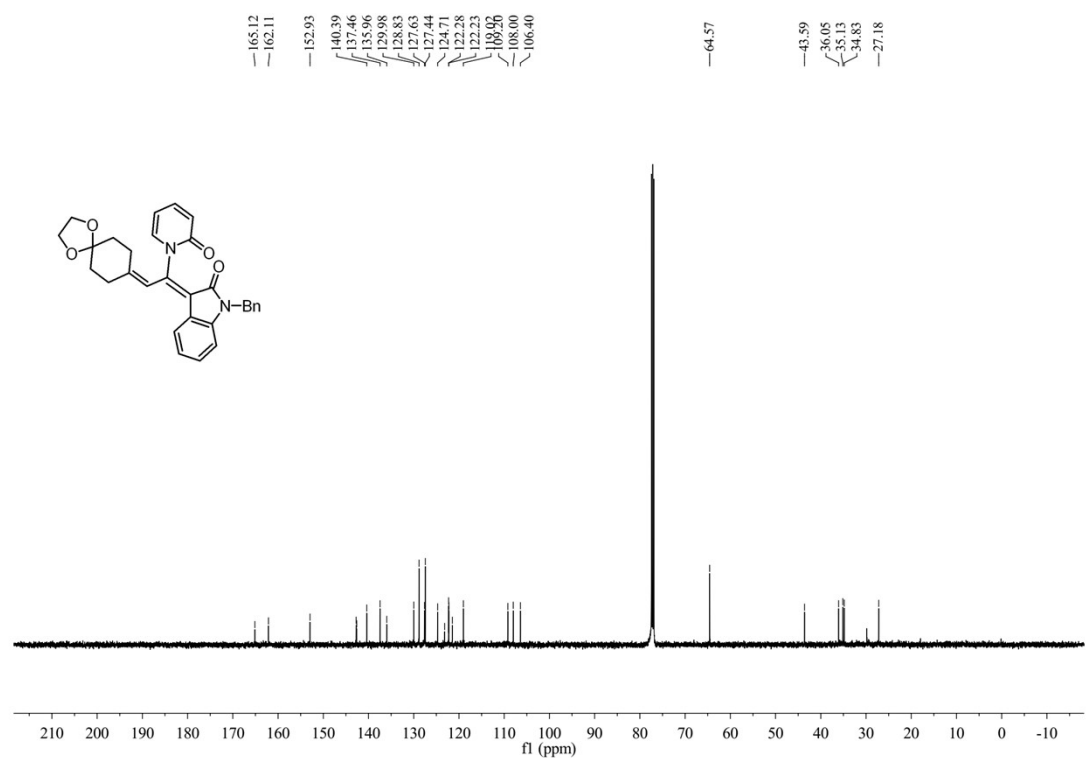

<sup>1</sup>H NMR (400 MHz, CDCl<sub>3</sub>) and <sup>13</sup>C NMR (100 MHz, CDCl<sub>3</sub>) spectra for 4ba

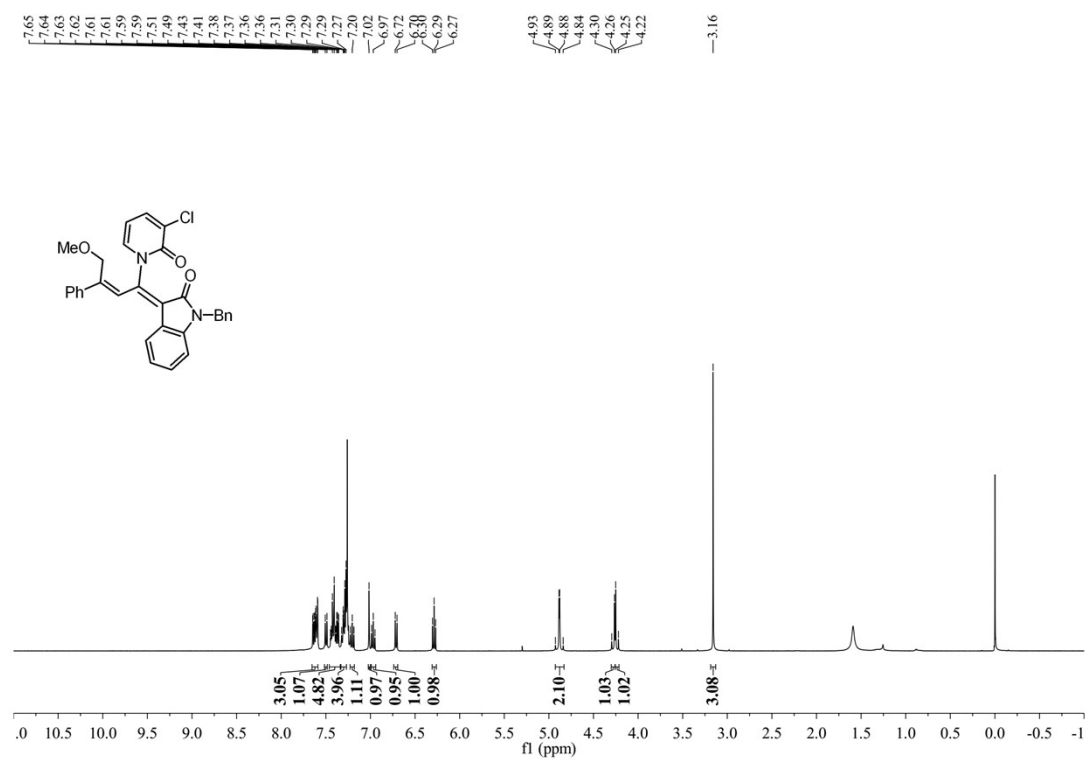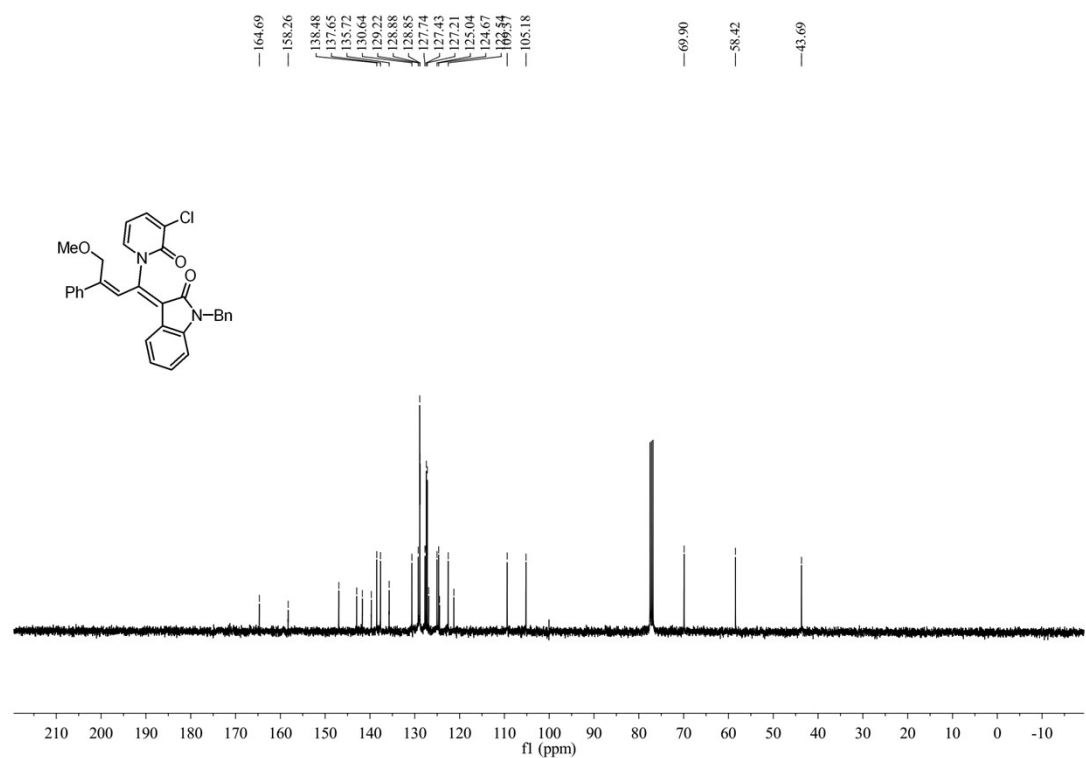

<sup>1</sup>H NMR (400 MHz, CDCl<sub>3</sub>) and <sup>13</sup>C NMR (100 MHz, CDCl<sub>3</sub>) spectra for 4bb

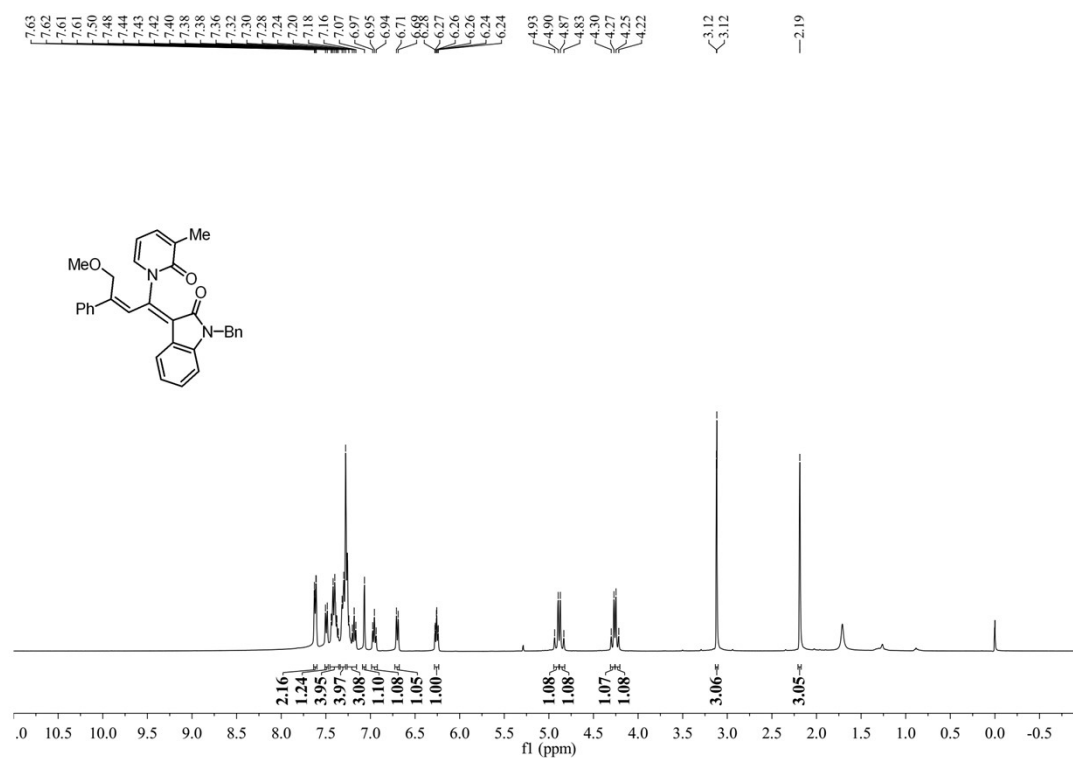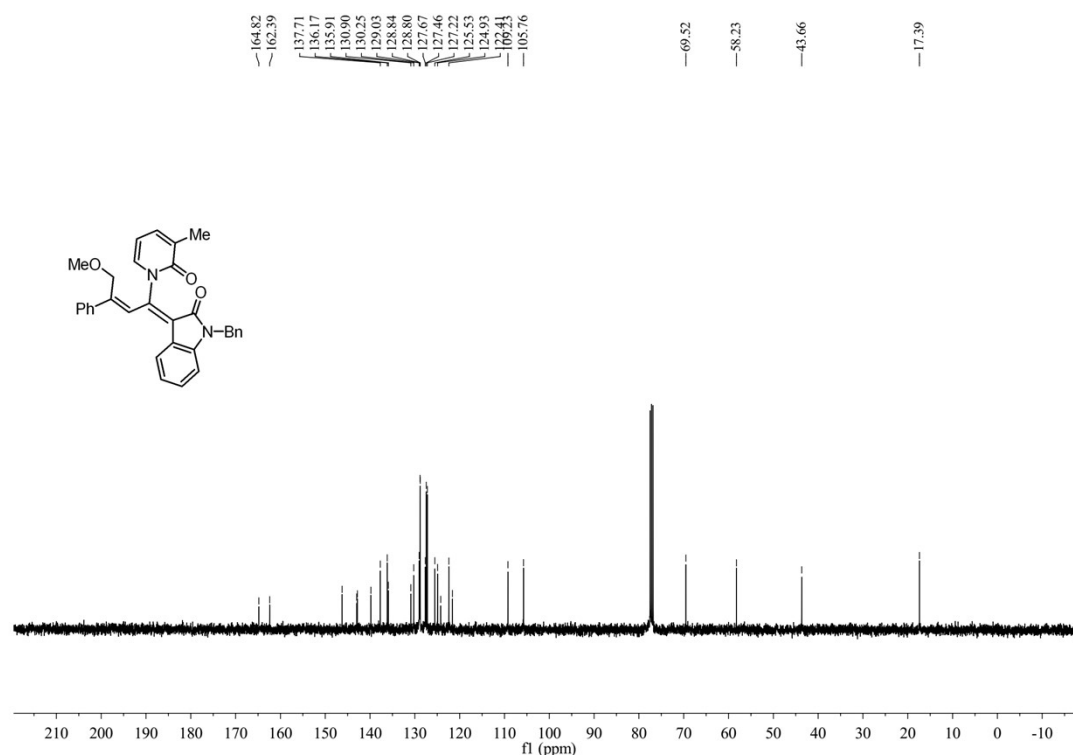

**<sup>1</sup>H NMR (500 MHz, CDCl<sub>3</sub>) and <sup>13</sup>C NMR (125 MHz, CDCl<sub>3</sub>) spectra for 4bc**

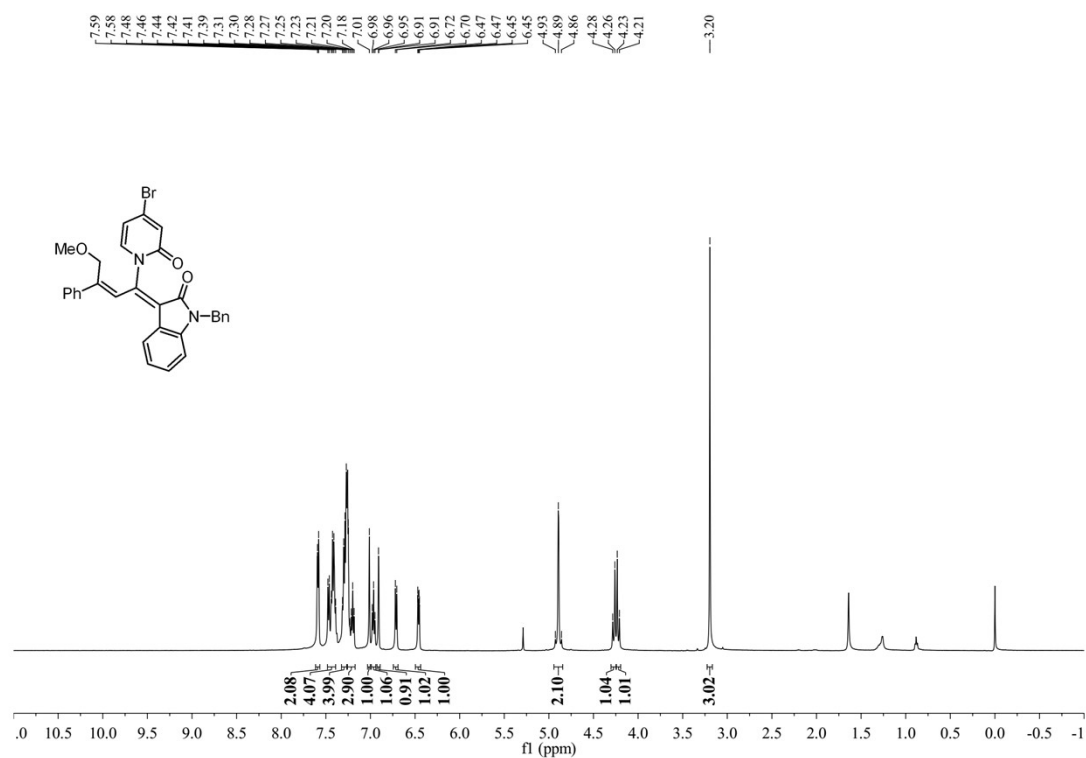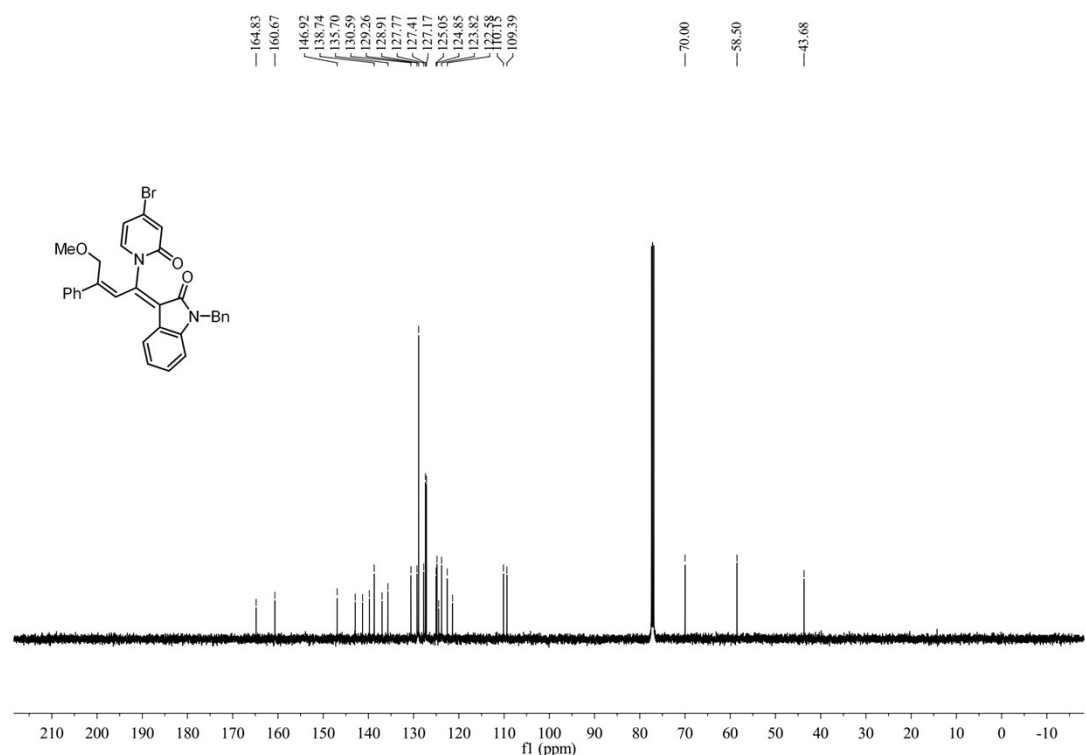

<sup>1</sup>H NMR (500 MHz, CDCl<sub>3</sub>) and <sup>13</sup>C NMR (125 MHz, CDCl<sub>3</sub>) spectra for 4bd

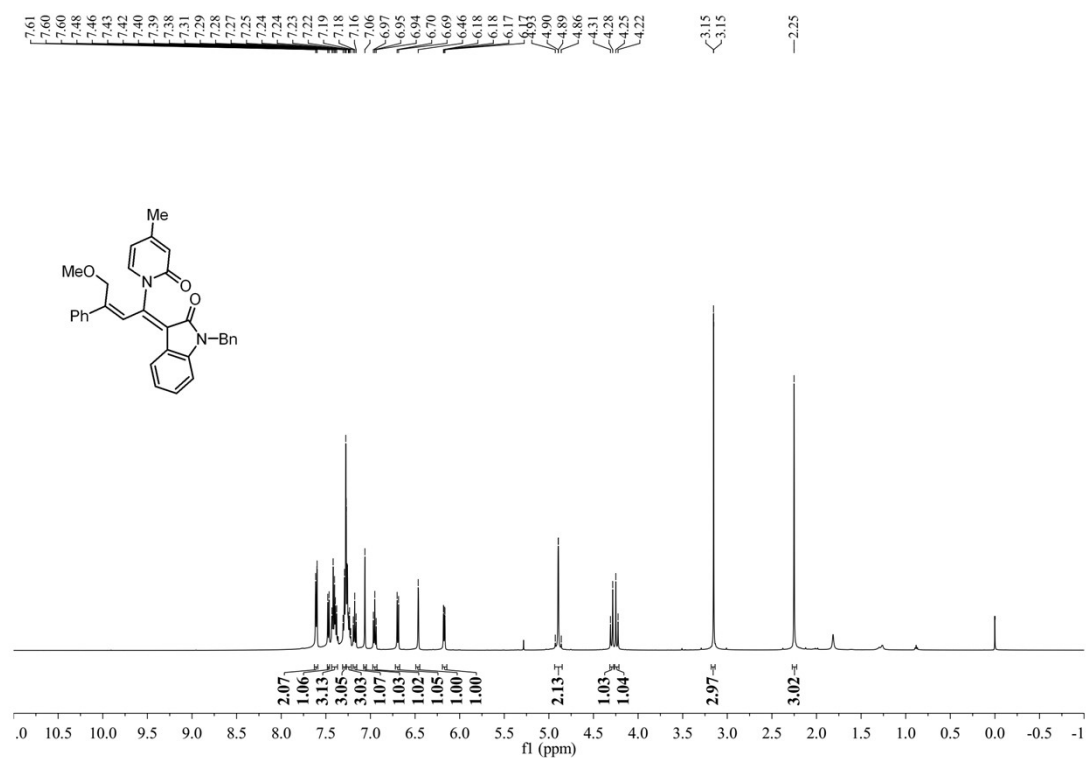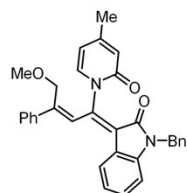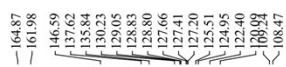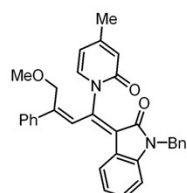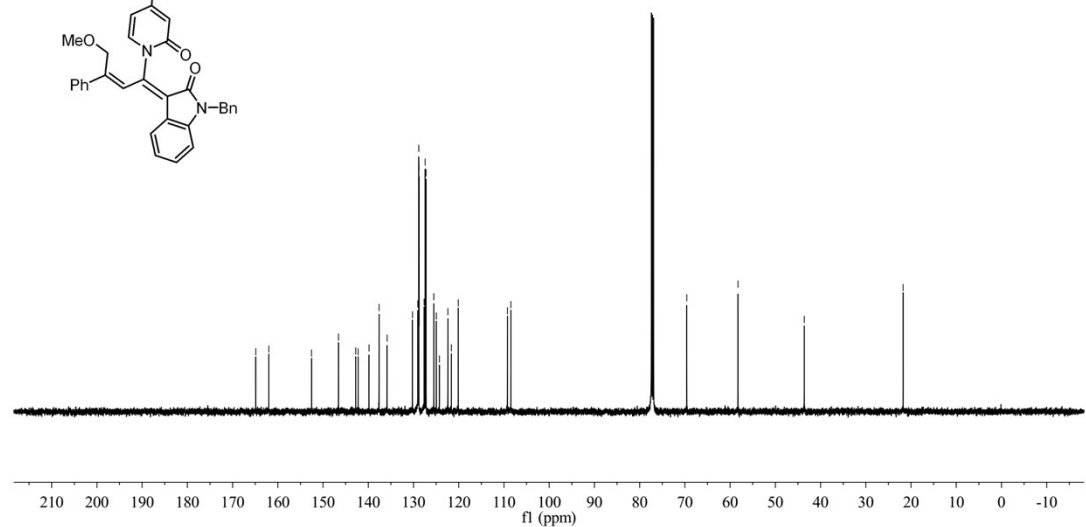

**<sup>1</sup>H NMR (500 MHz, CDCl<sub>3</sub>) and <sup>13</sup>C NMR (125 MHz, CDCl<sub>3</sub>) spectra for 4be**

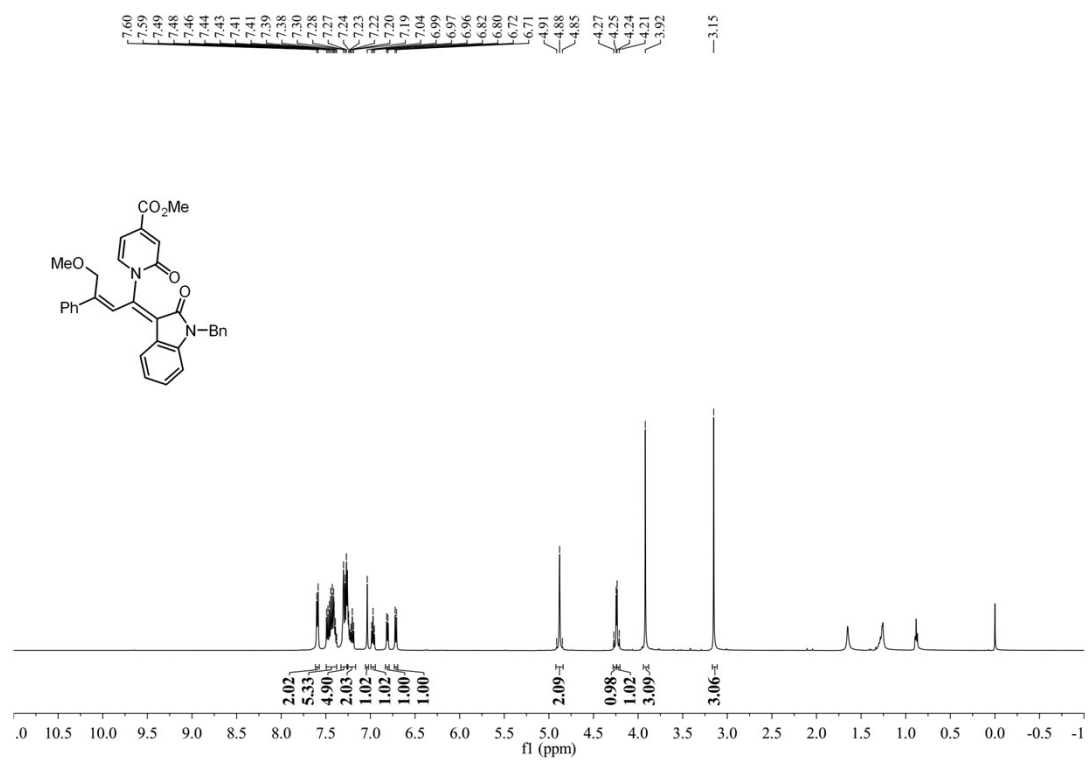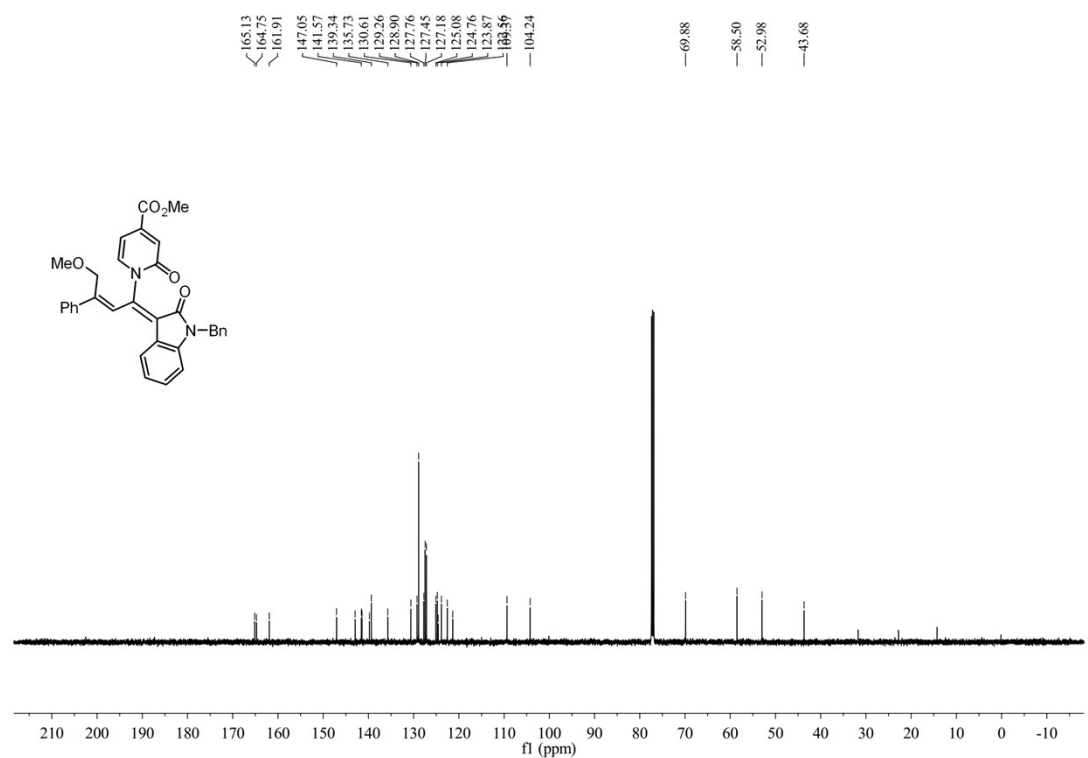

<sup>1</sup>H NMR (500 MHz, CDCl<sub>3</sub>) and <sup>13</sup>C NMR (125 MHz, CDCl<sub>3</sub>) spectra for 4bf

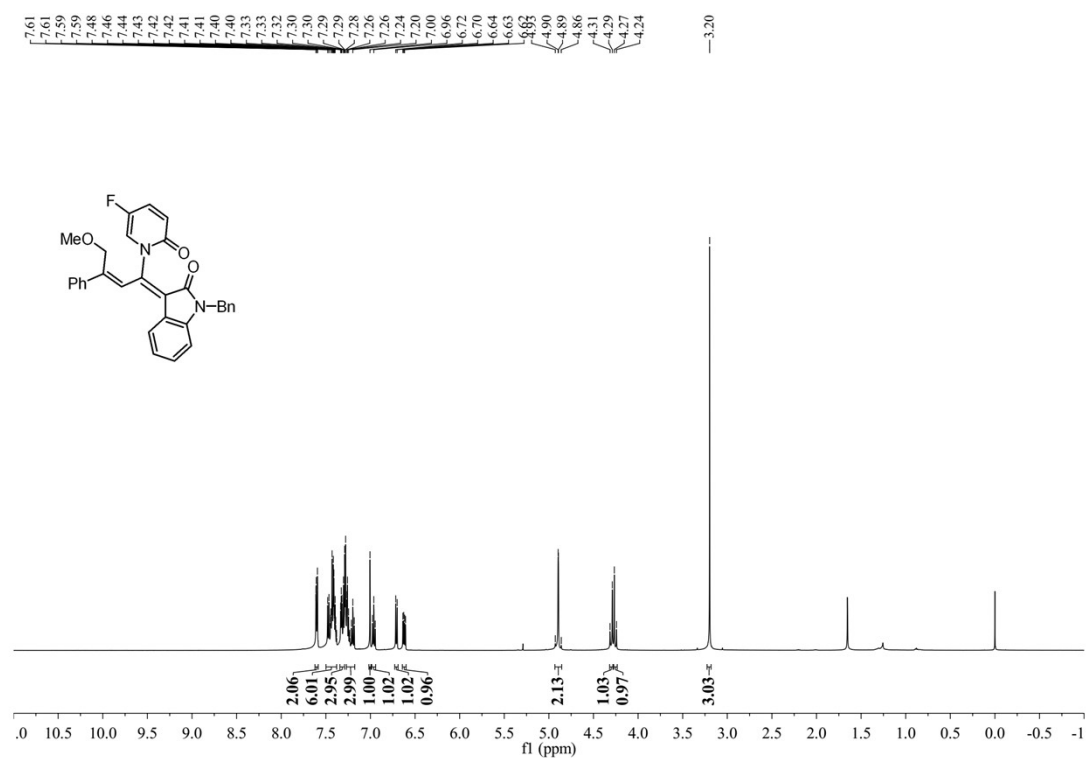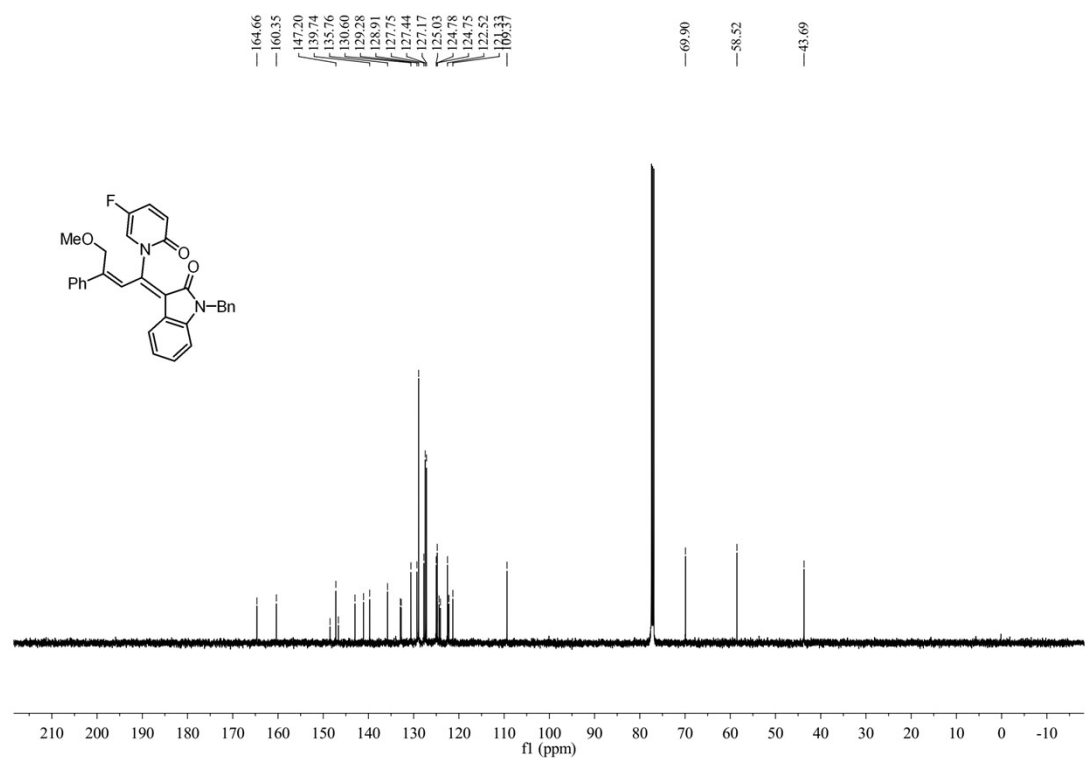



**<sup>19</sup>F NMR (376 MHz, CDCl<sub>3</sub>) spectra for 4bf**

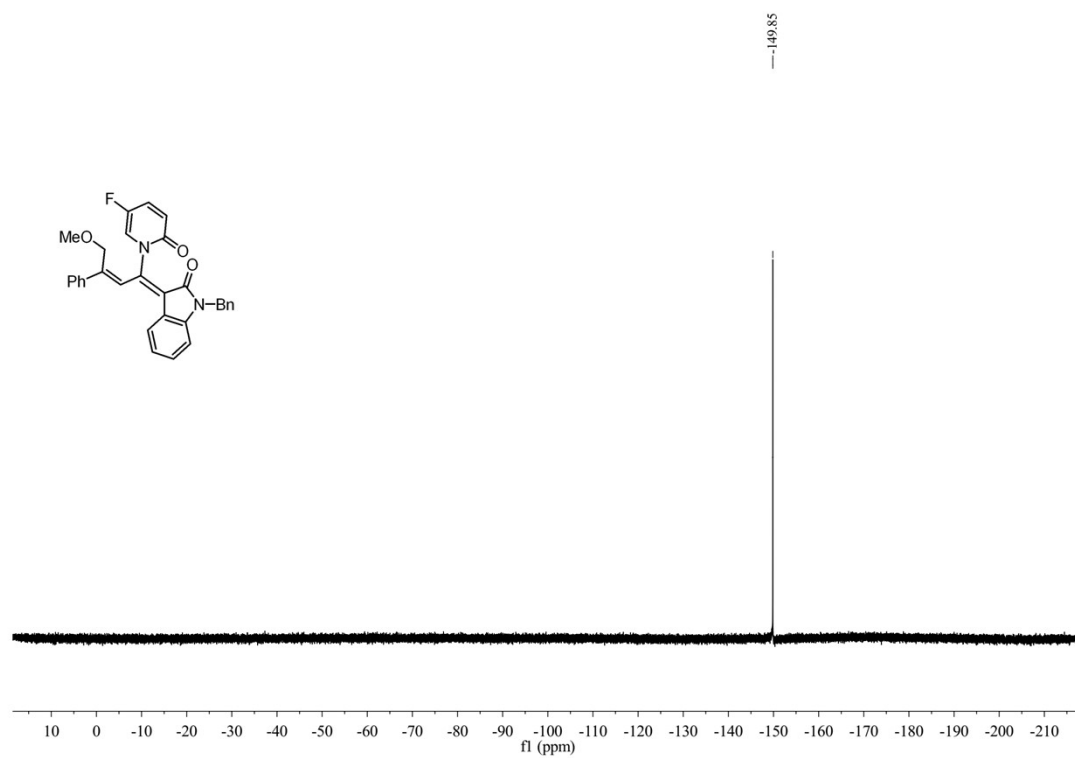

<sup>1</sup>H NMR (500 MHz, CDCl<sub>3</sub>) and <sup>13</sup>C NMR (125 MHz, CDCl<sub>3</sub>) spectra for 4bg

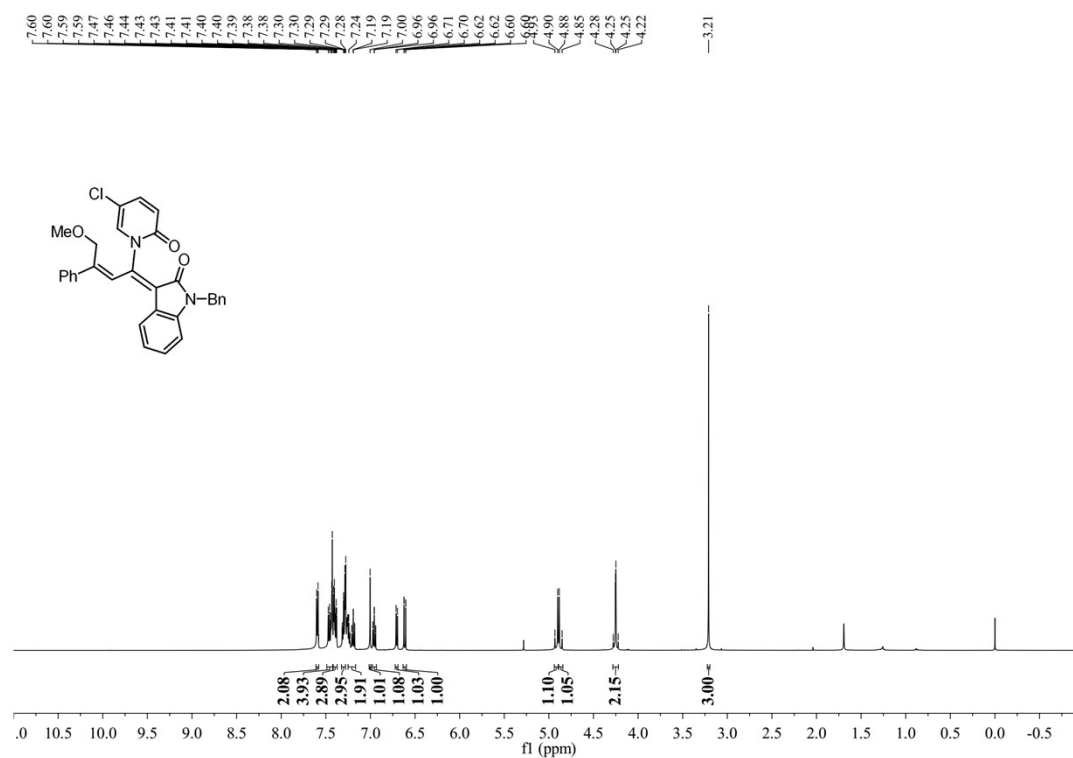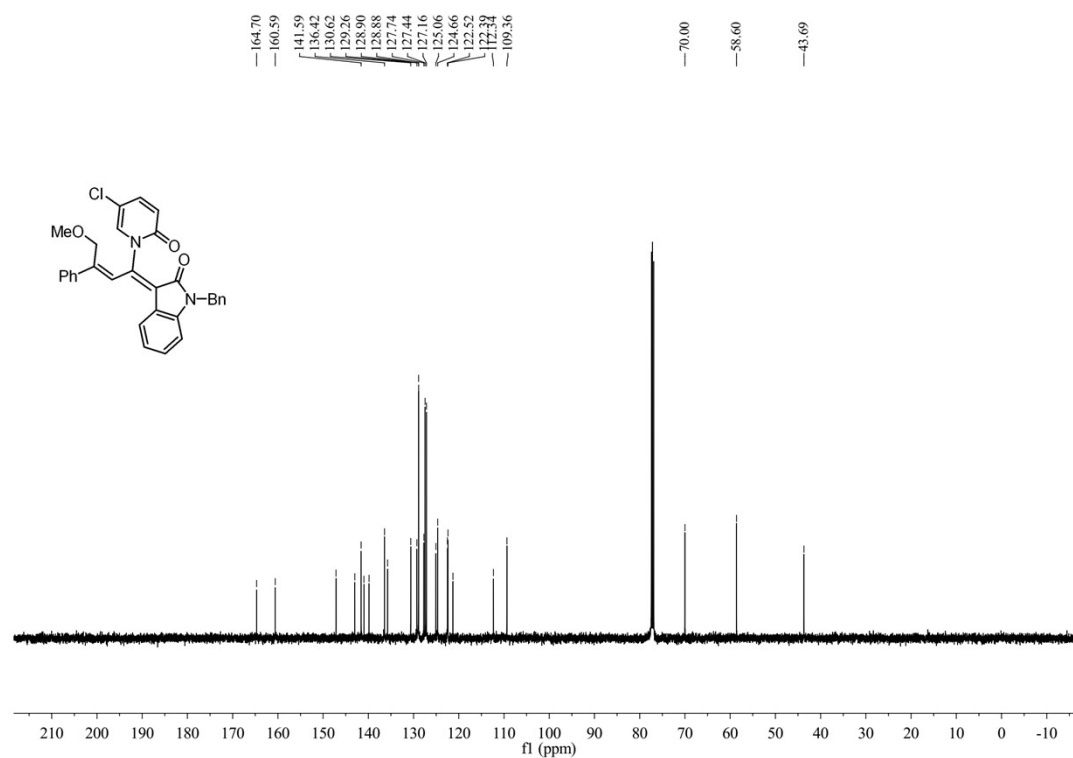

<sup>1</sup>H NMR (500 MHz, CDCl<sub>3</sub>) and <sup>13</sup>C NMR (125 MHz, CDCl<sub>3</sub>) spectra for 4bh

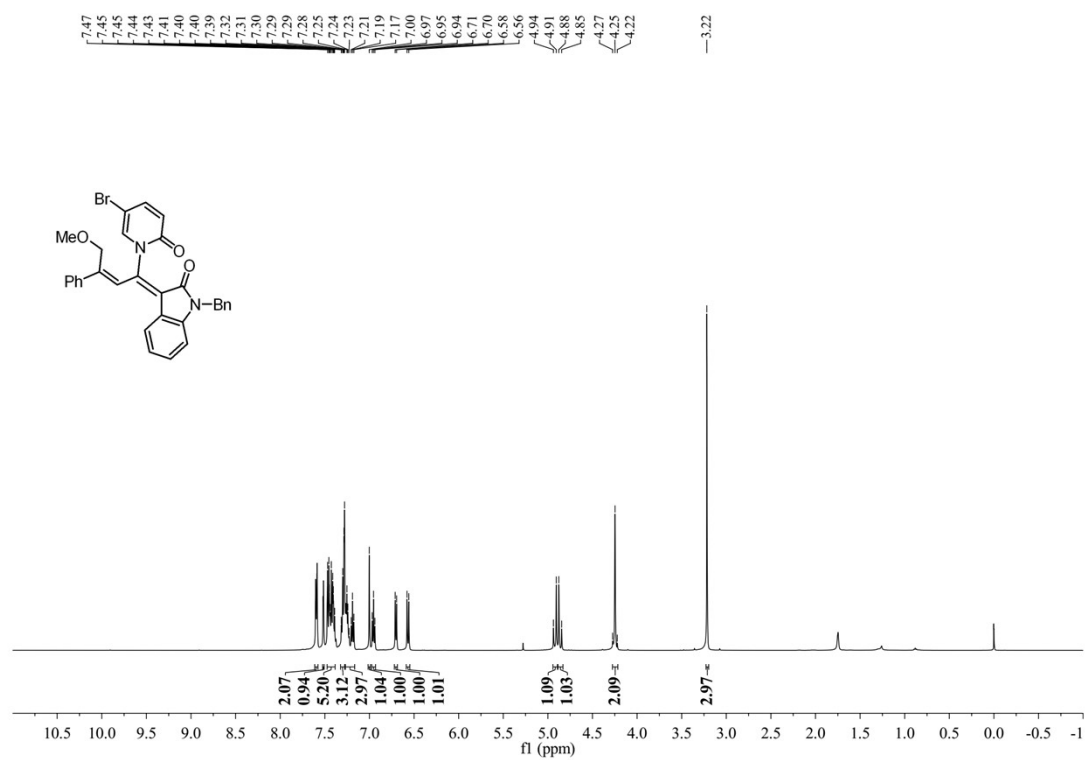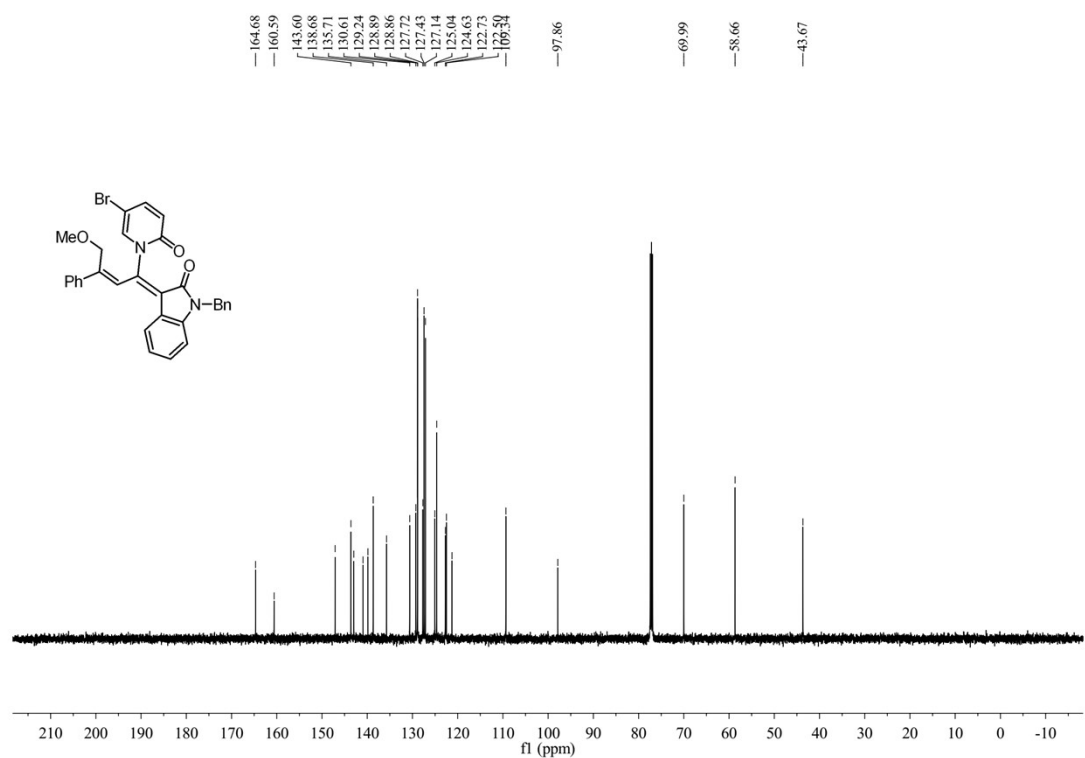



<sup>1</sup>H NMR (400 MHz, CDCl<sub>3</sub>) and <sup>13</sup>C NMR (125 MHz, CDCl<sub>3</sub>) spectra for 4bj

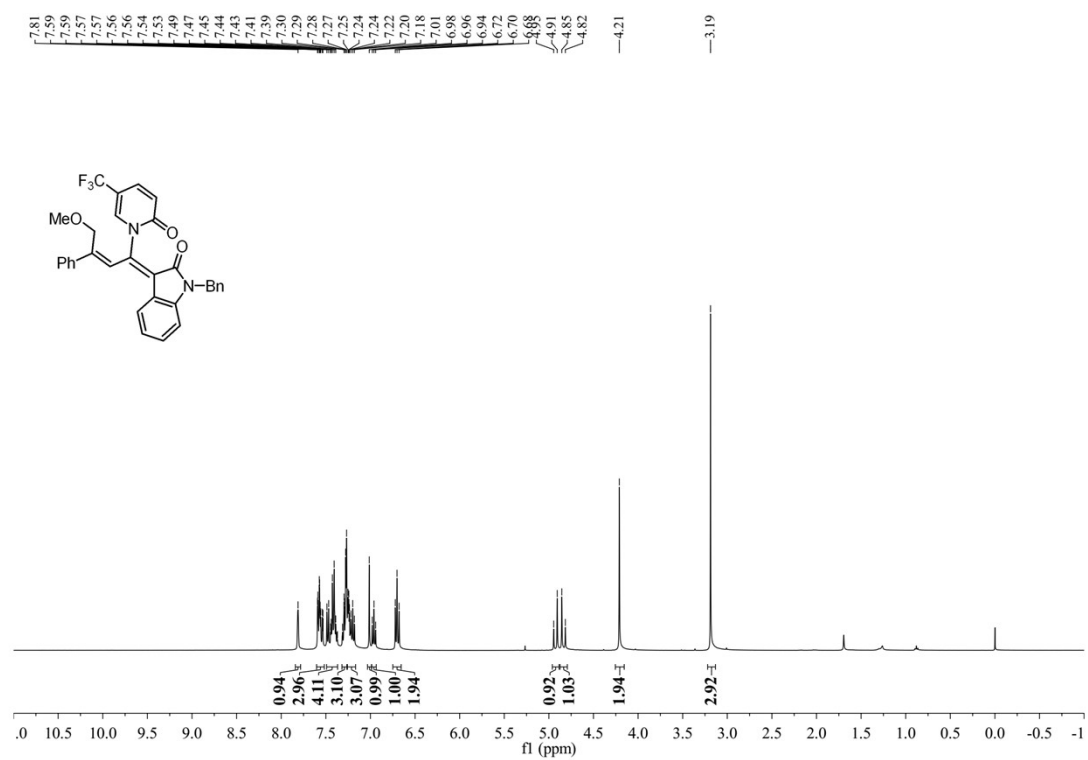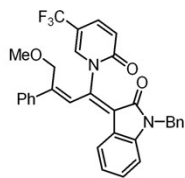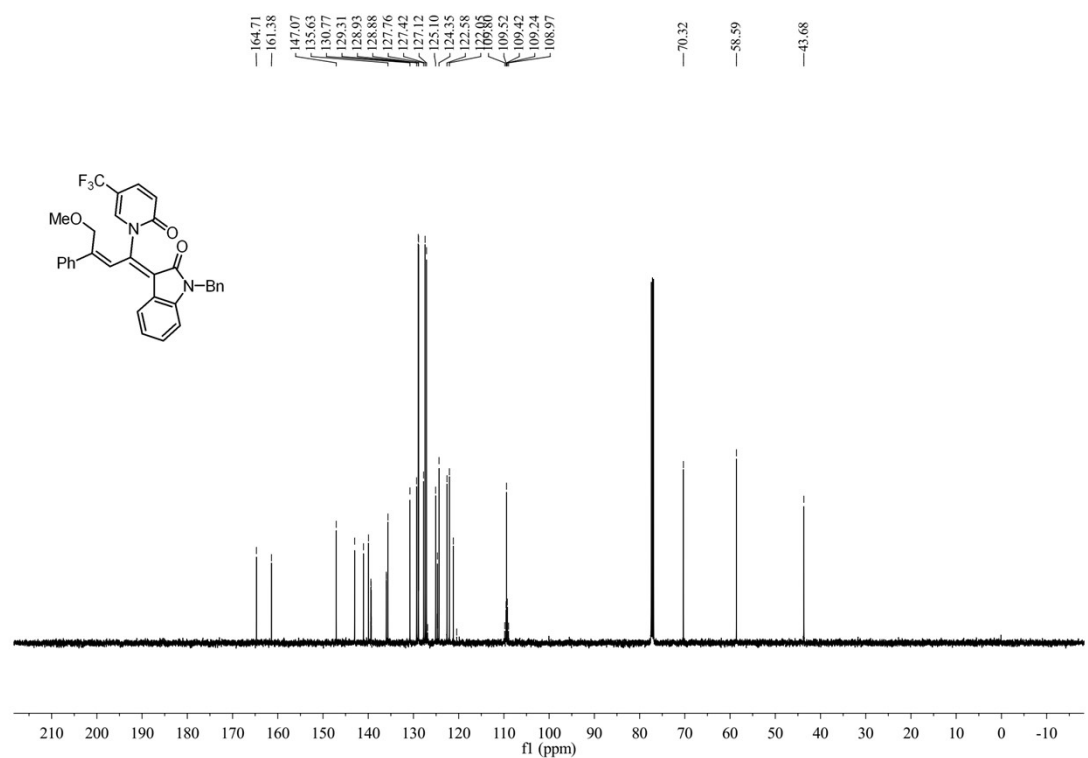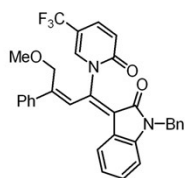

**<sup>19</sup>F NMR (376 MHz, CDCl<sub>3</sub>) spectra for 4bj**

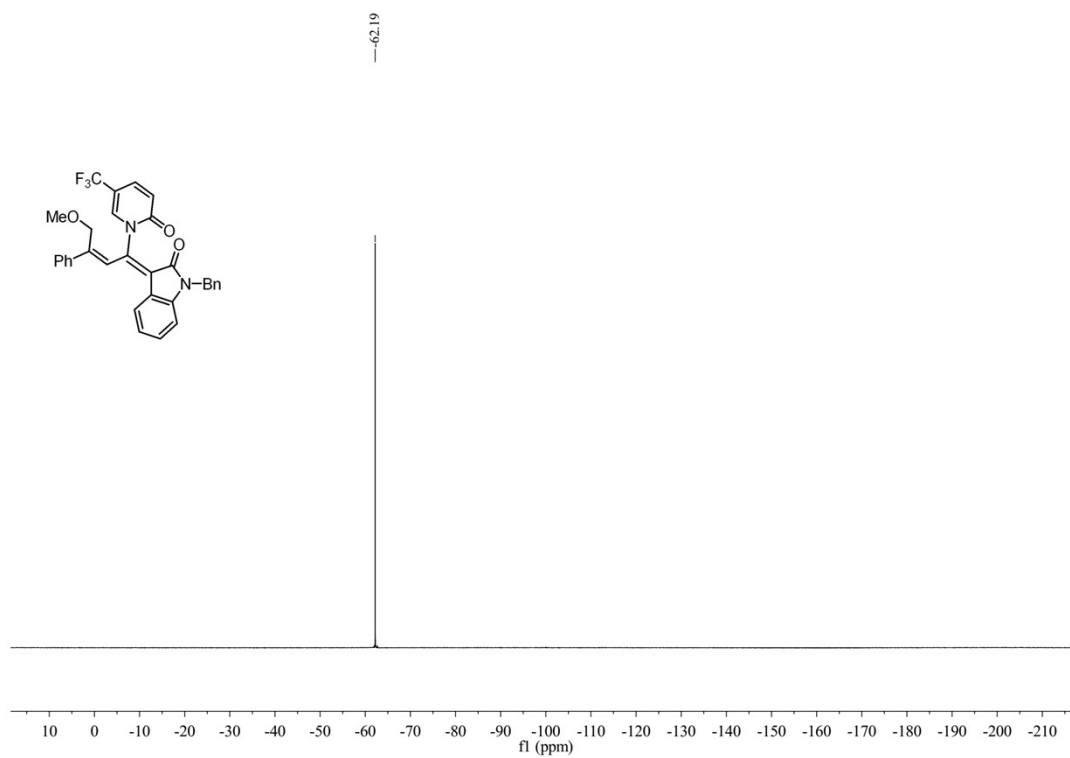

<sup>1</sup>H NMR (400 MHz, CDCl<sub>3</sub>) and <sup>13</sup>C NMR (100 MHz, CDCl<sub>3</sub>) spectra for 4ca

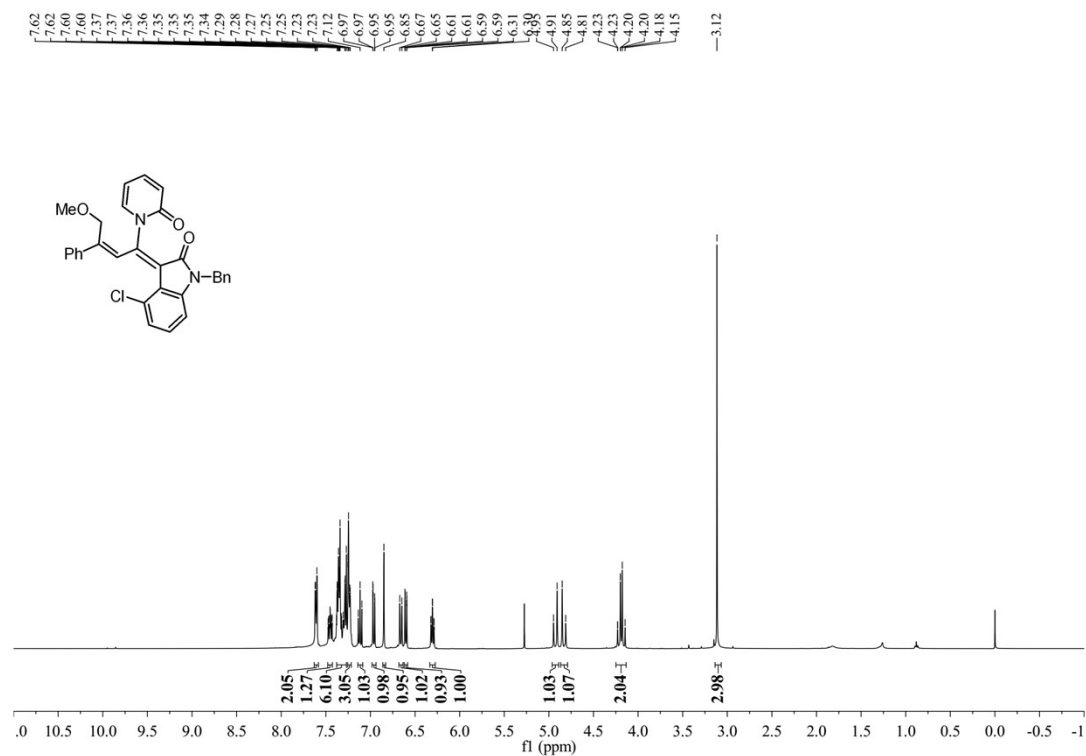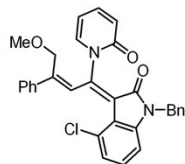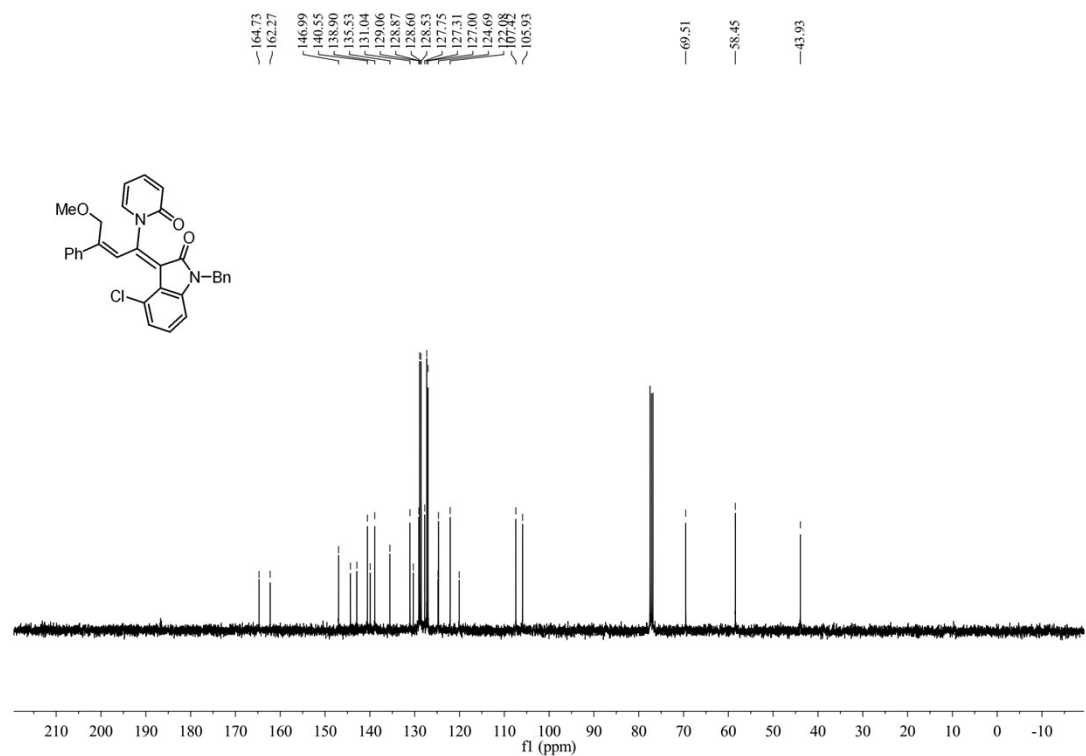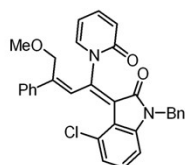

**$^1\text{H}$  NMR (500 MHz,  $\text{CDCl}_3$ ) and  $^{13}\text{C}$  NMR (125 MHz,  $\text{CDCl}_3$ ) spectra for 4cb**

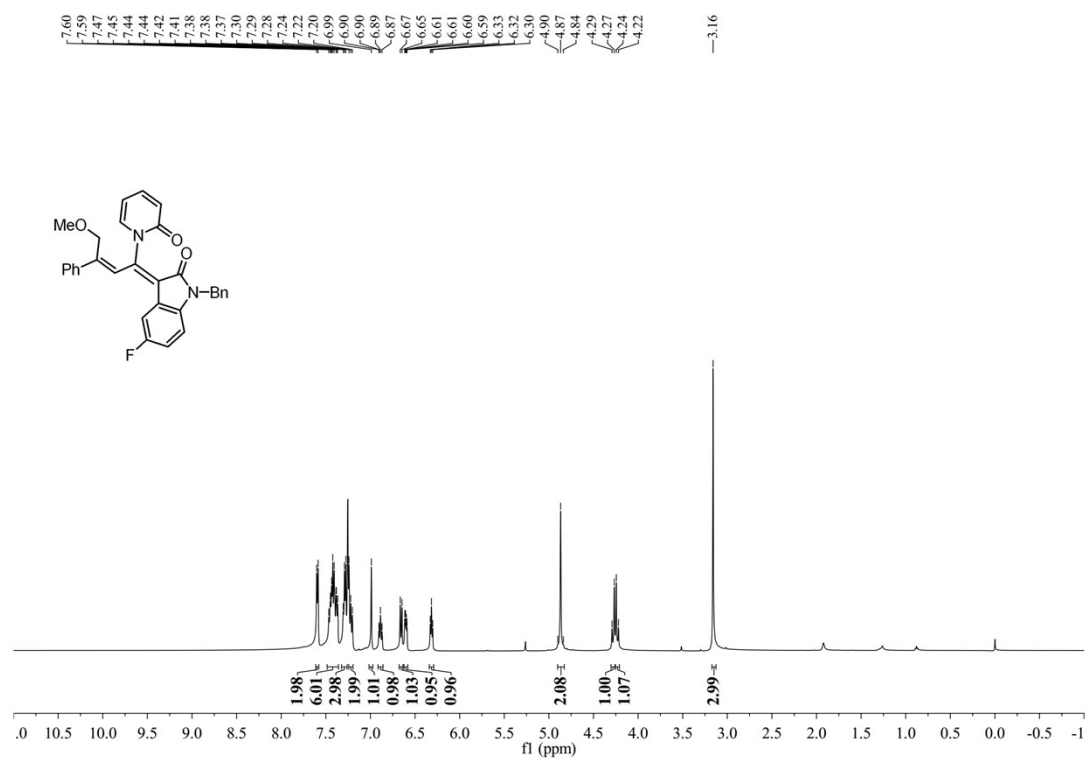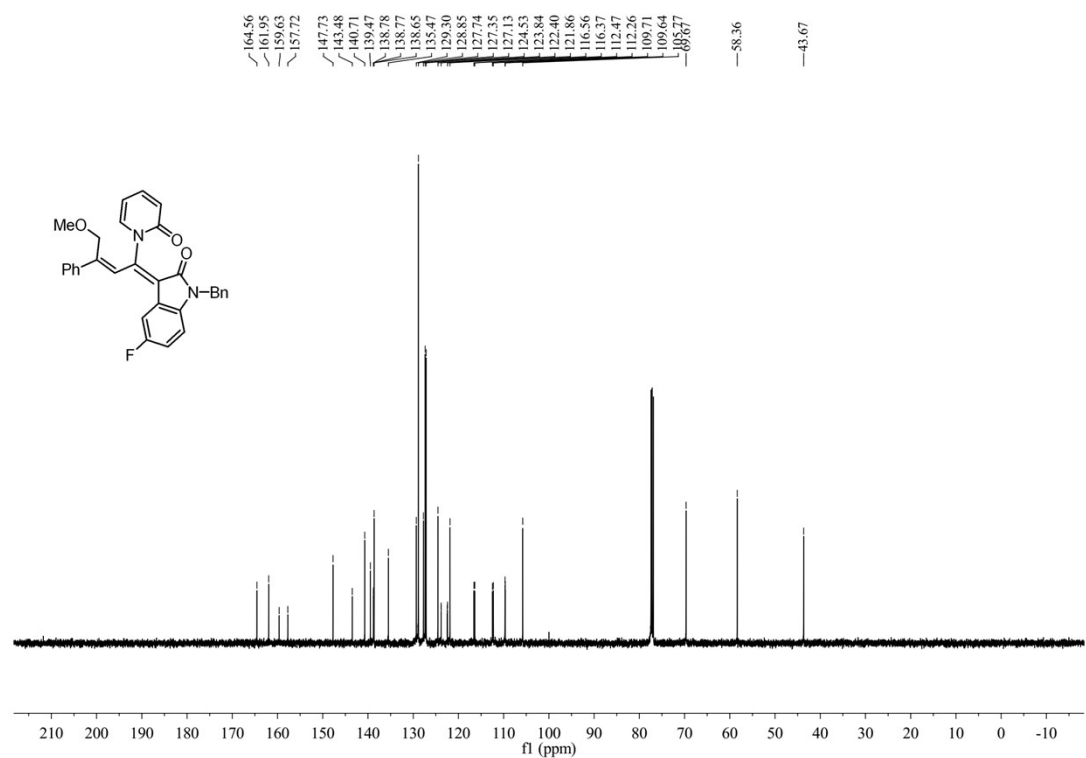



<sup>19</sup>F NMR (376 MHz, CDCl<sub>3</sub>) spectra for 4b

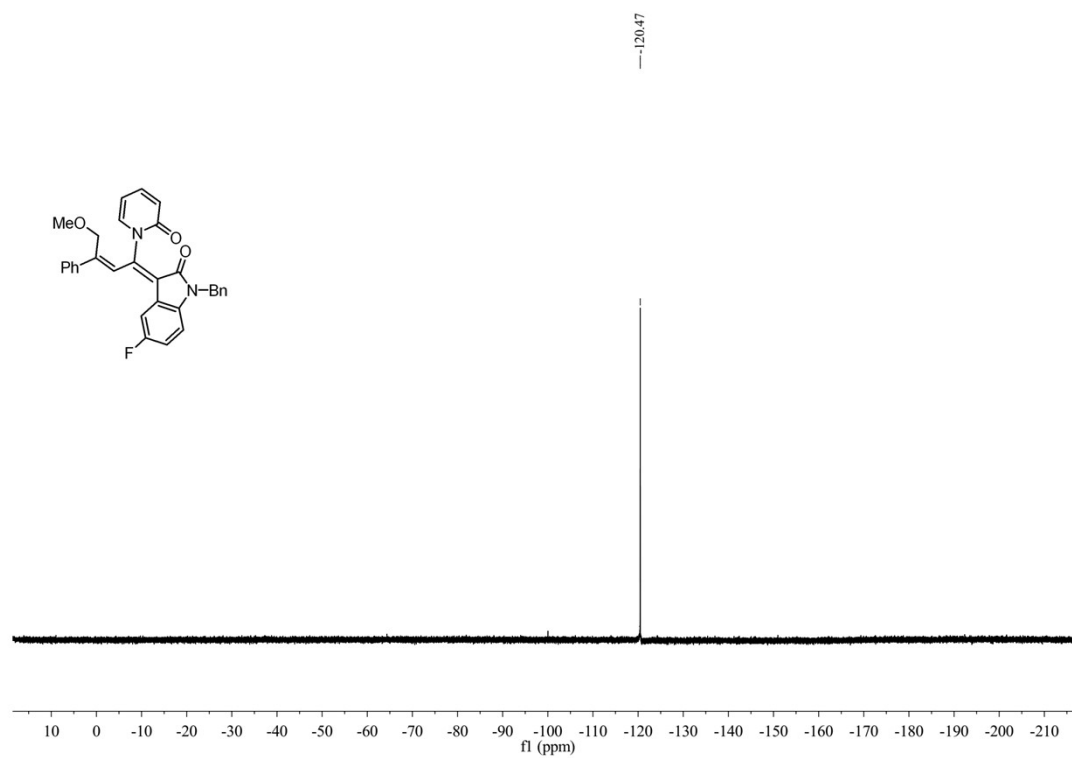

<sup>1</sup>H NMR (400 MHz, CDCl<sub>3</sub>) and <sup>13</sup>C NMR (100 MHz, CDCl<sub>3</sub>) spectra for 4cc

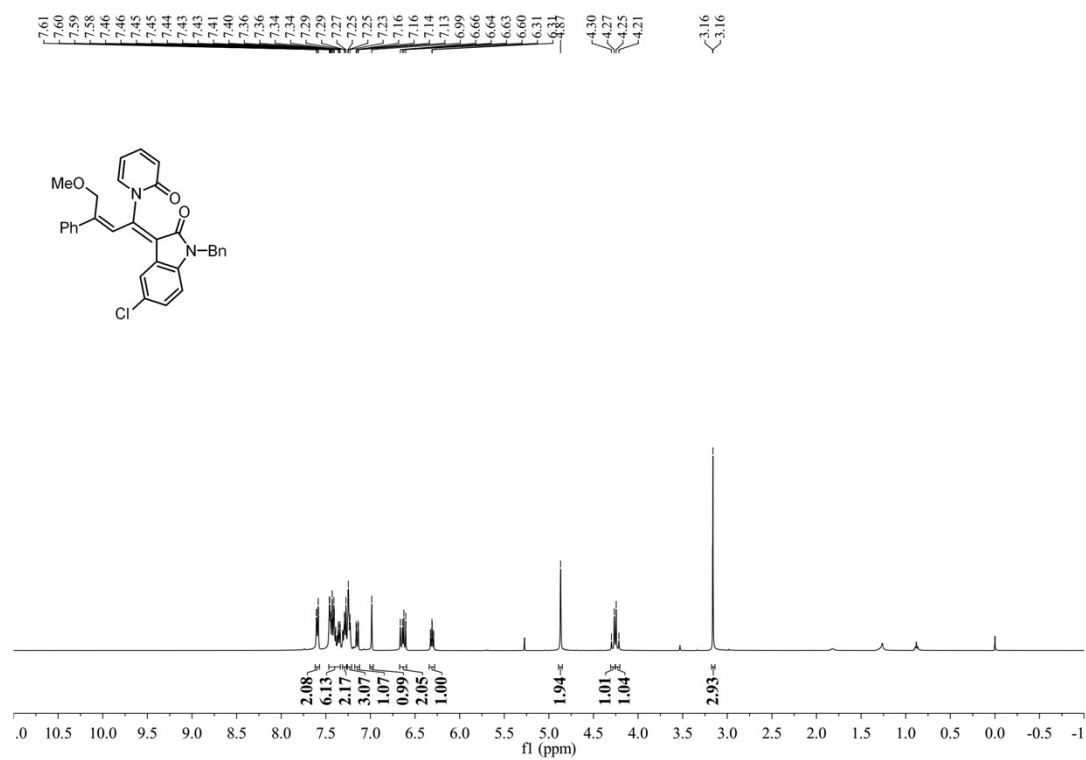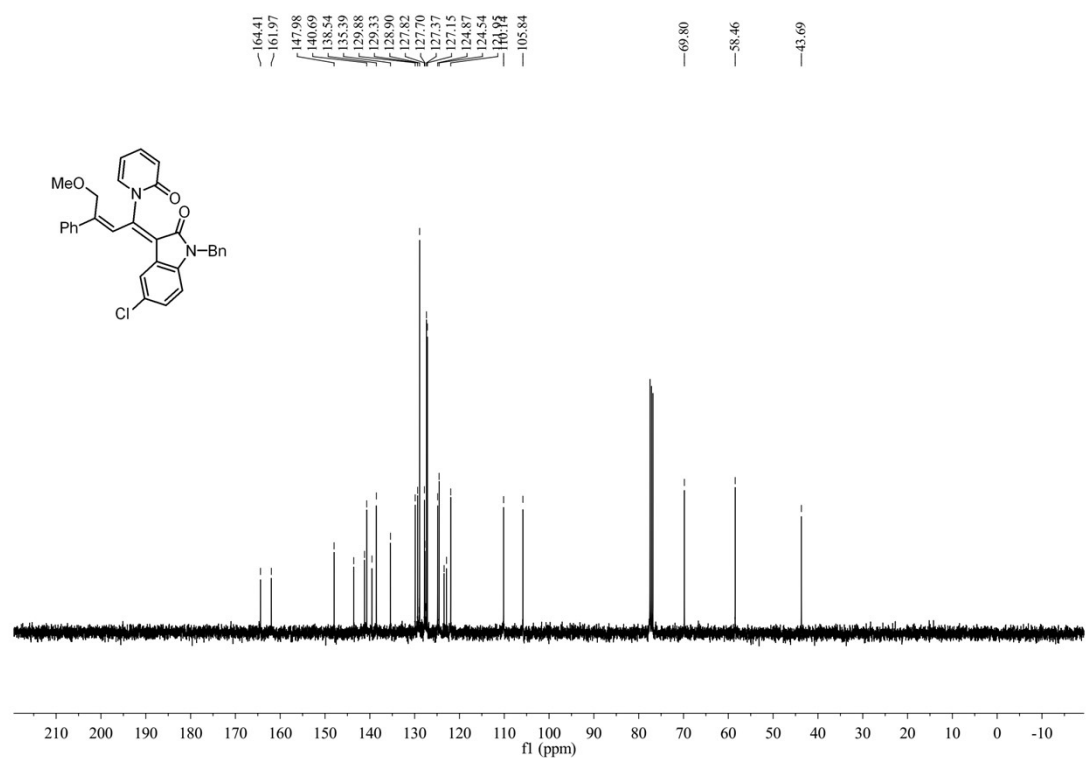

<sup>1</sup>H NMR (500 MHz, CDCl<sub>3</sub>) and <sup>13</sup>C NMR (125 MHz, CDCl<sub>3</sub>) spectra for 4c

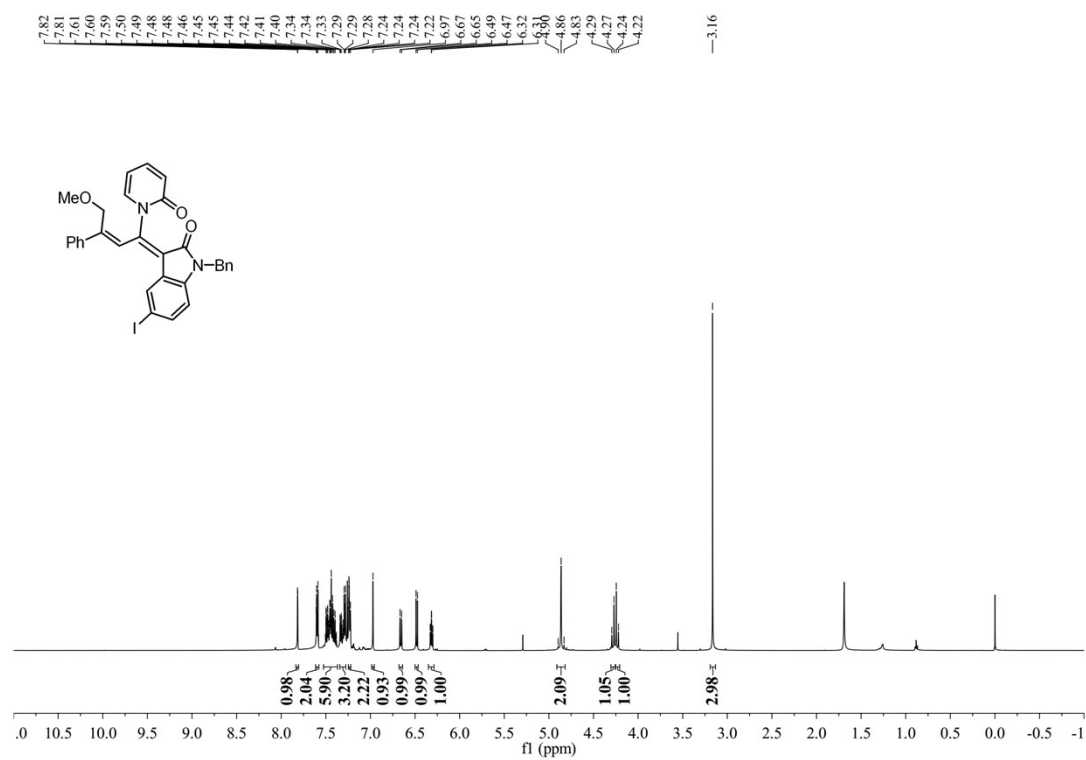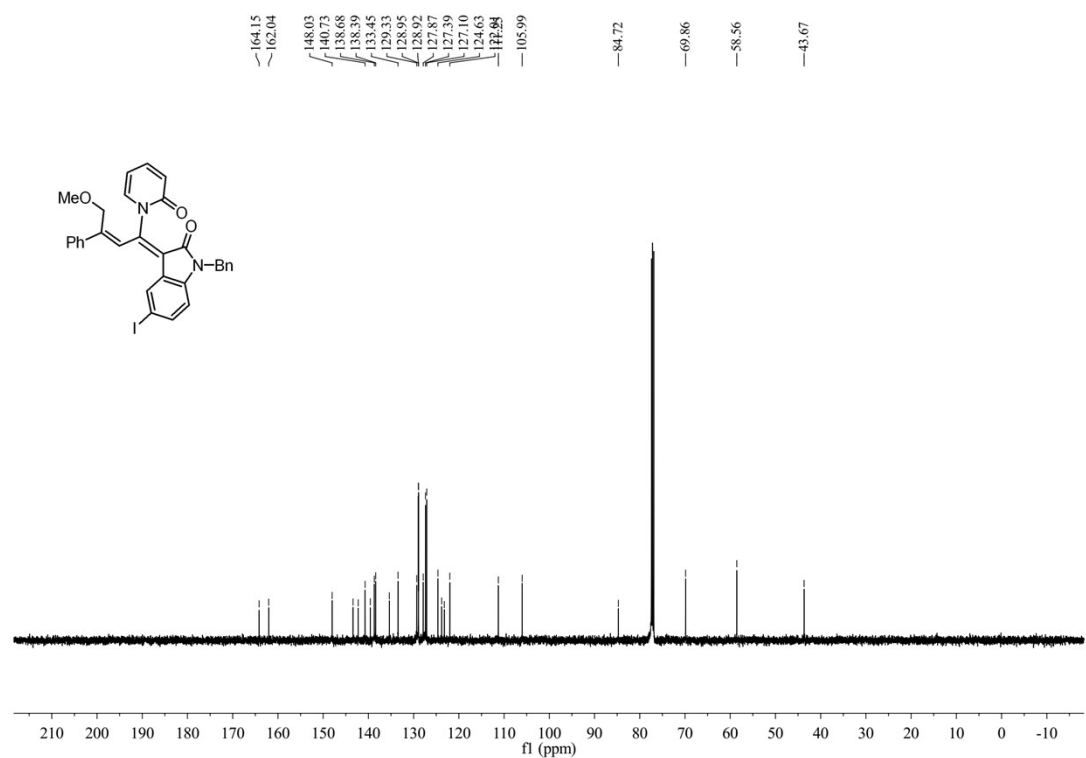

<sup>1</sup>H NMR (500 MHz, CDCl<sub>3</sub>) and <sup>13</sup>C NMR (125 MHz, CDCl<sub>3</sub>) spectra for 4ce

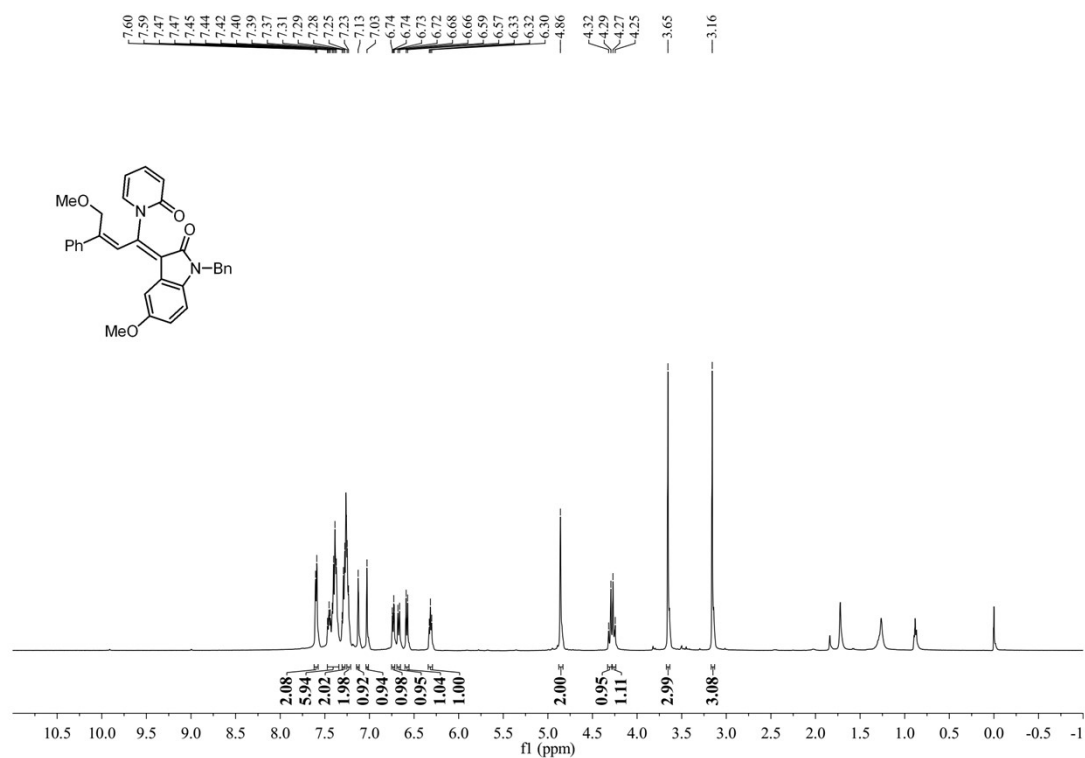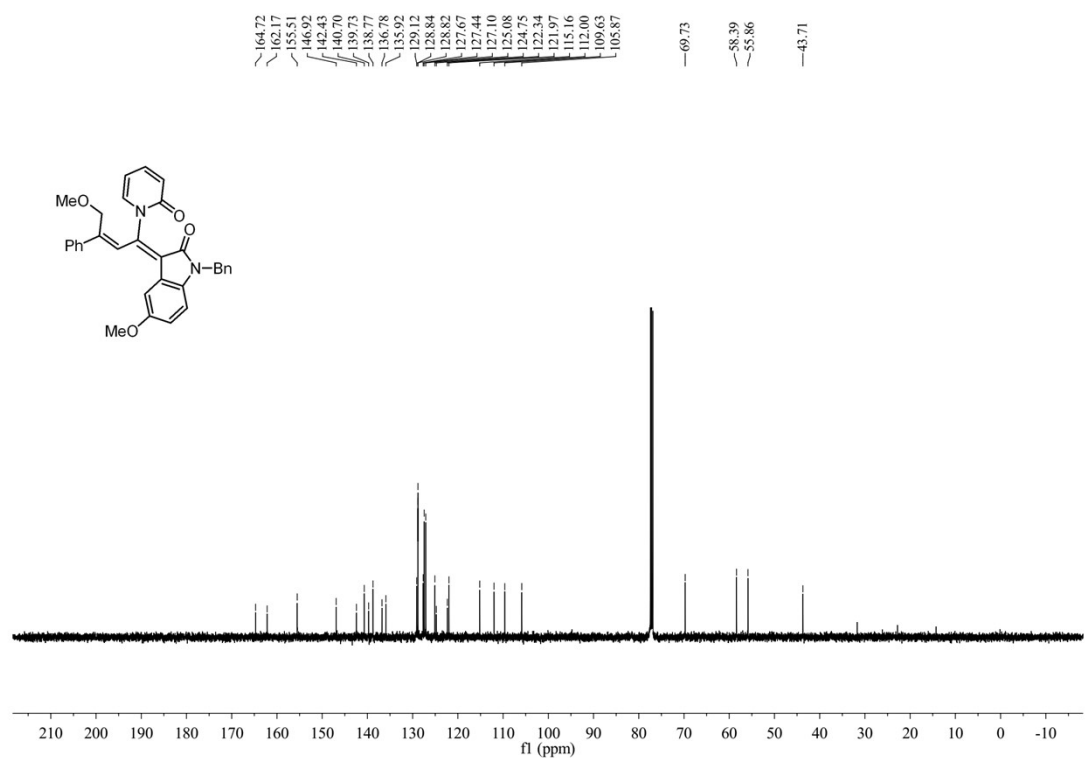

<sup>1</sup>H NMR (500 MHz, CDCl<sub>3</sub>) and <sup>13</sup>C NMR (125 MHz, CDCl<sub>3</sub>) spectra for 4c

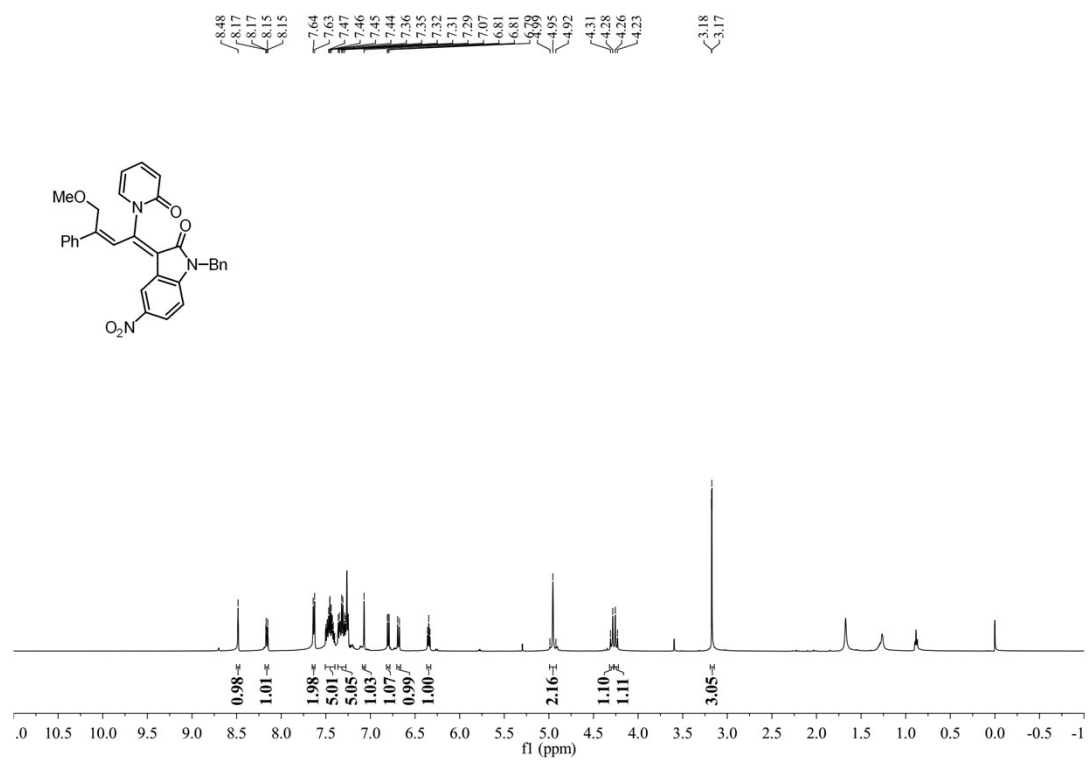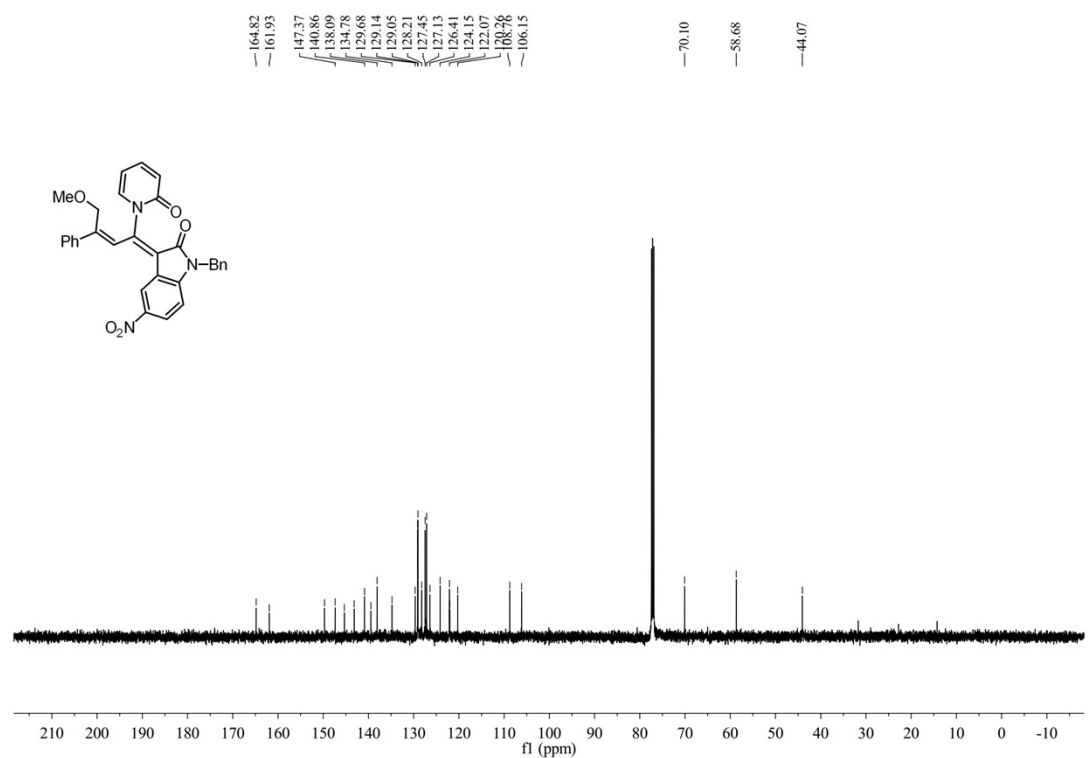

<sup>1</sup>H NMR (500 MHz, CDCl<sub>3</sub>) and <sup>13</sup>C NMR (125 MHz, CDCl<sub>3</sub>) spectra for 4c

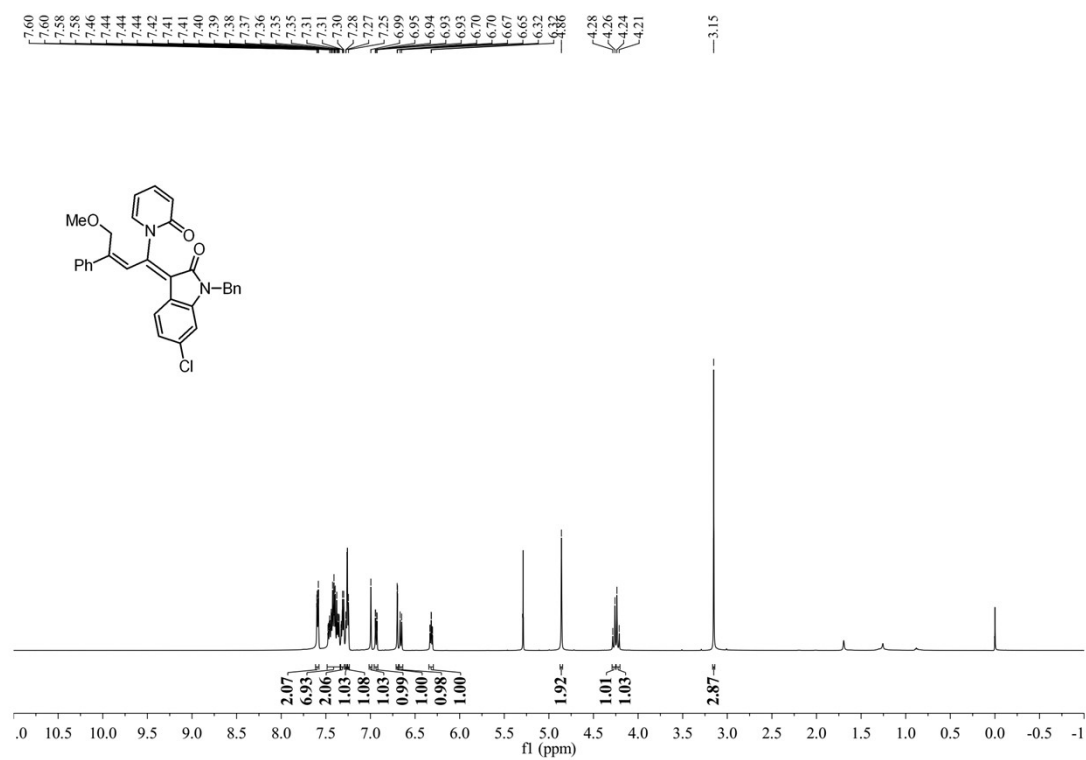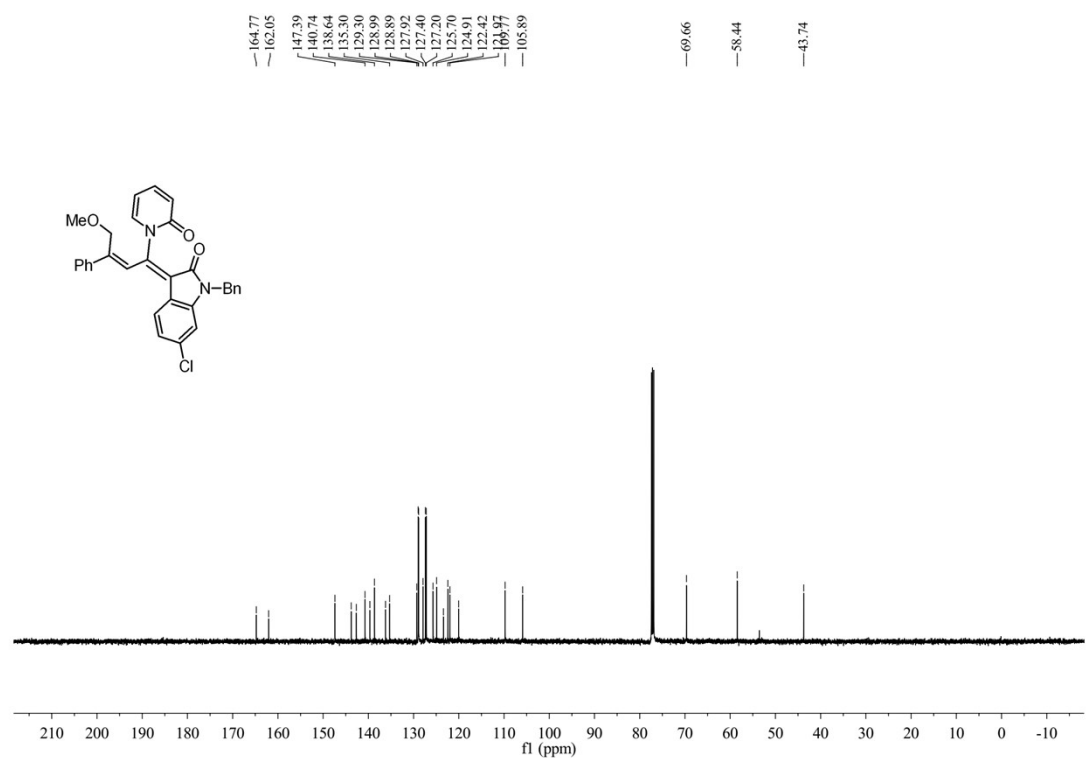

**<sup>1</sup>H NMR (500 MHz, CDCl<sub>3</sub>) and <sup>13</sup>C NMR (125 MHz, CDCl<sub>3</sub>) spectra for 4c**

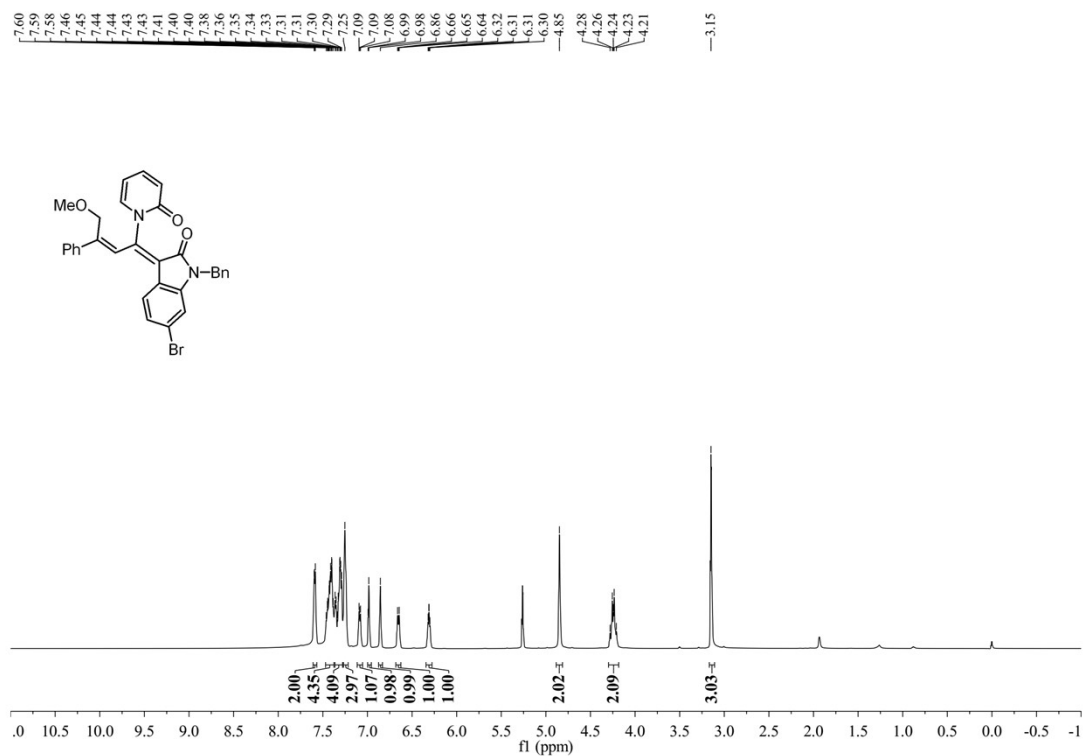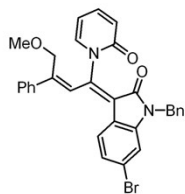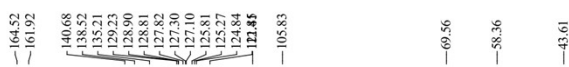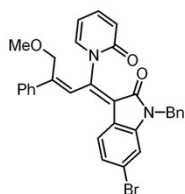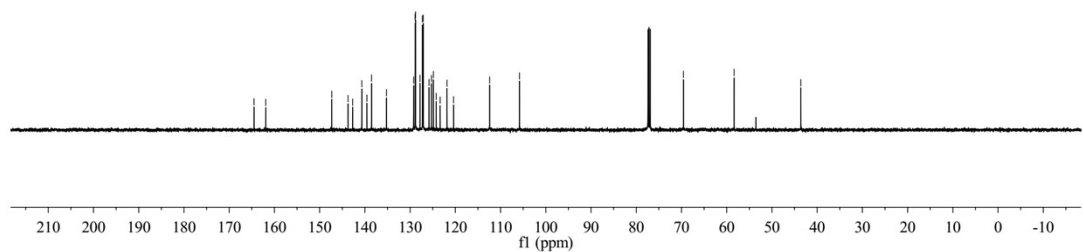

<sup>1</sup>H NMR (400 MHz, CDCl<sub>3</sub>) and <sup>13</sup>C NMR (100 MHz, CDCl<sub>3</sub>) spectra for 4ci

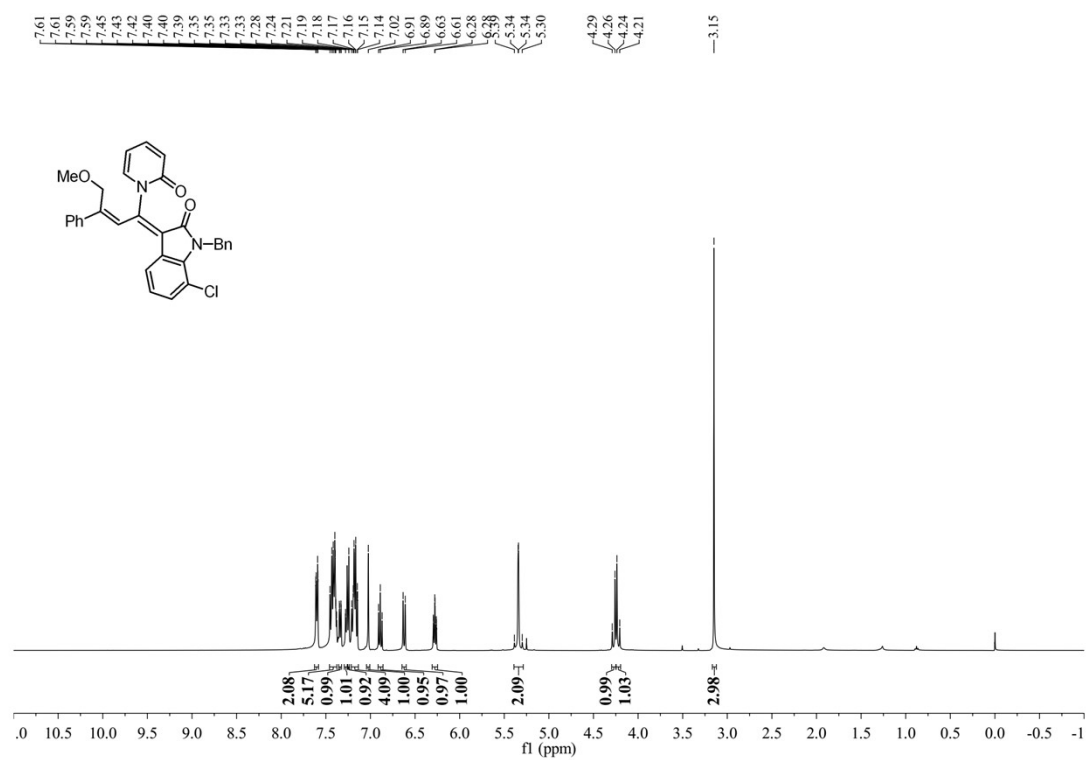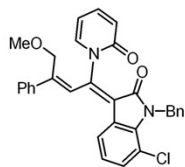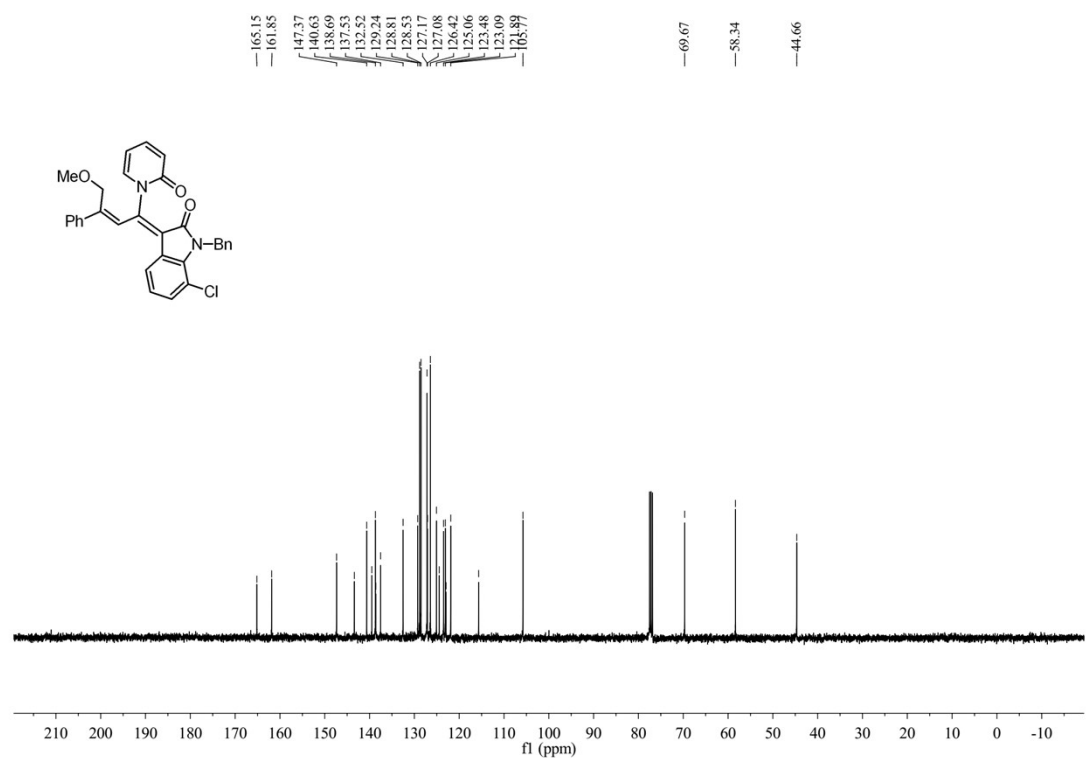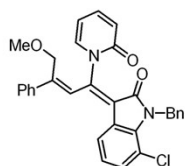



<sup>1</sup>H NMR (400 MHz, CDCl<sub>3</sub>) and <sup>13</sup>C NMR (100 MHz, CDCl<sub>3</sub>) spectra for 4c

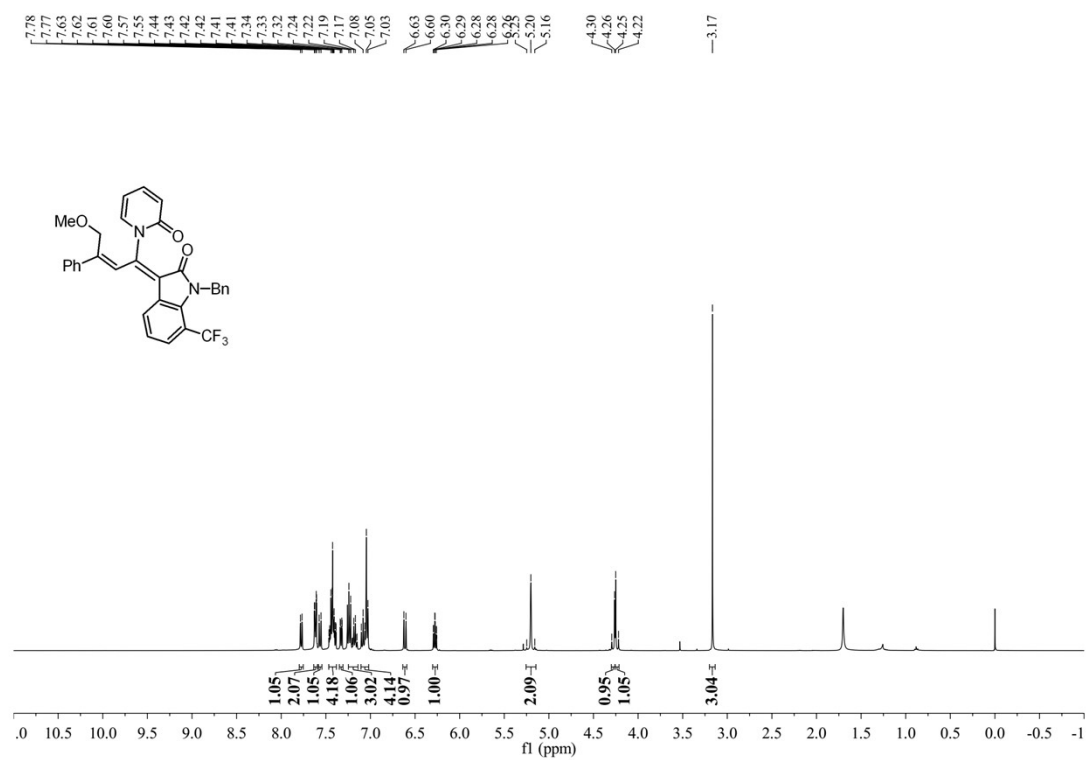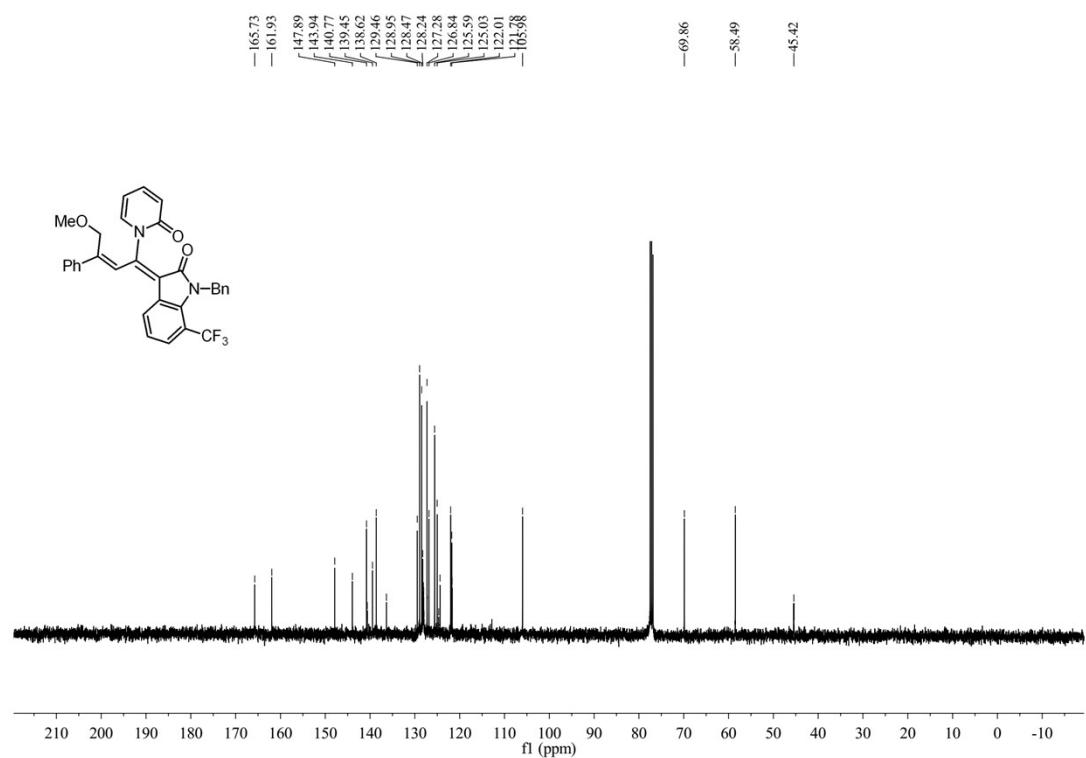

**<sup>19</sup>F NMR (376 MHz, CDCl<sub>3</sub>) spectra for 4cj**

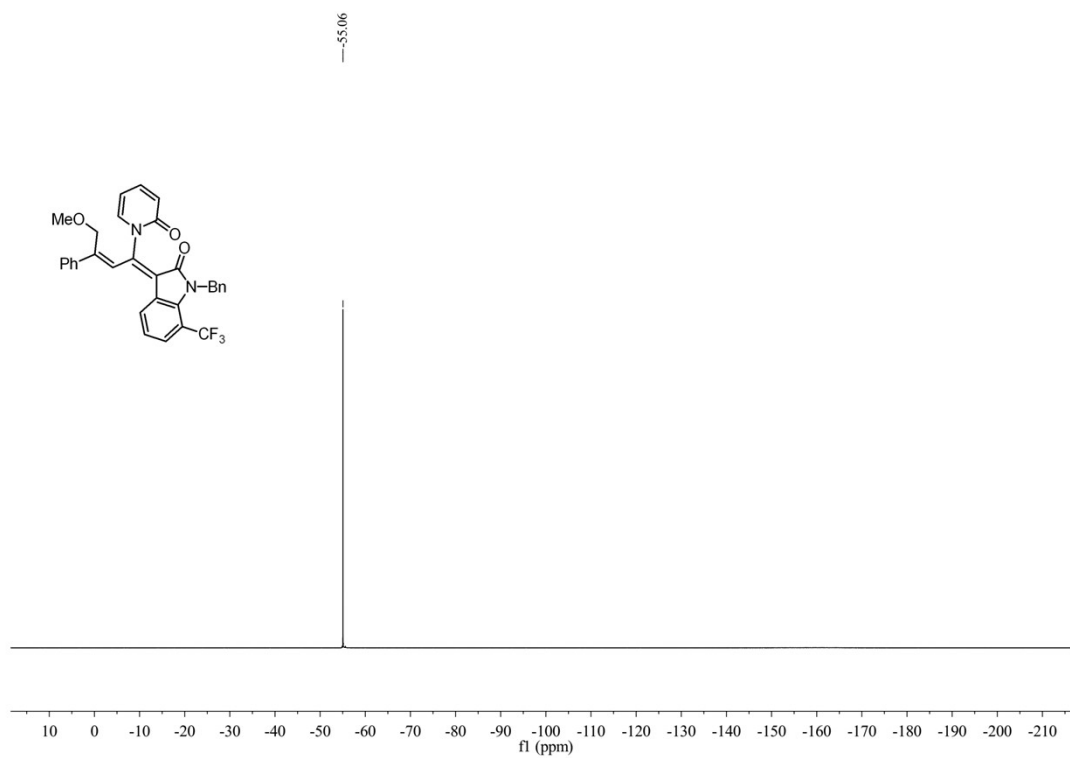

<sup>1</sup>H NMR (500 MHz, CDCl<sub>3</sub>) and <sup>13</sup>C NMR (125 MHz, CDCl<sub>3</sub>) spectra for 4ck

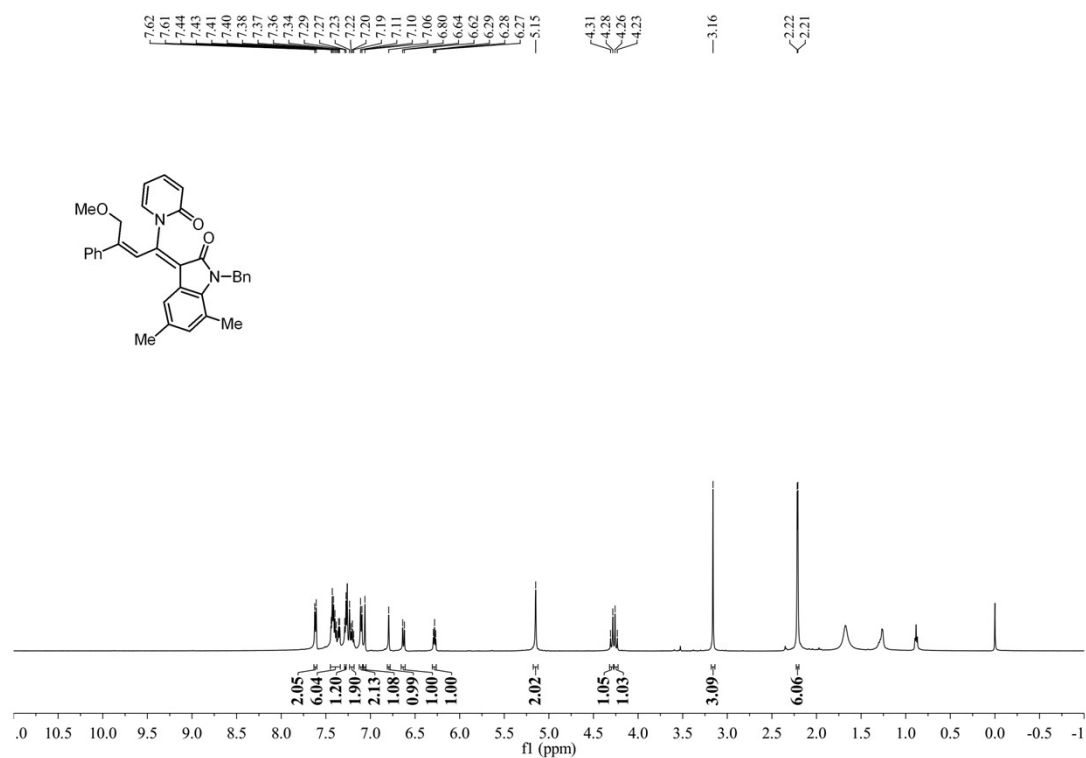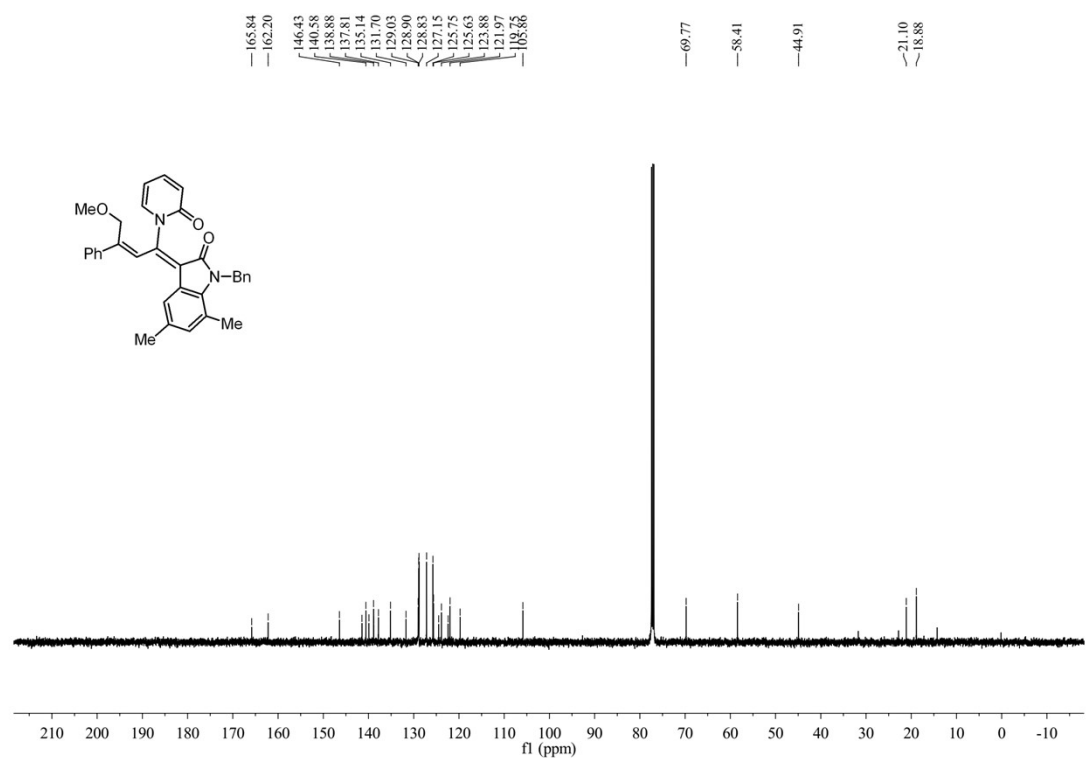

<sup>1</sup>H NMR (500 MHz, CDCl<sub>3</sub>) and <sup>13</sup>C NMR (125 MHz, CDCl<sub>3</sub>) spectra for 4c1

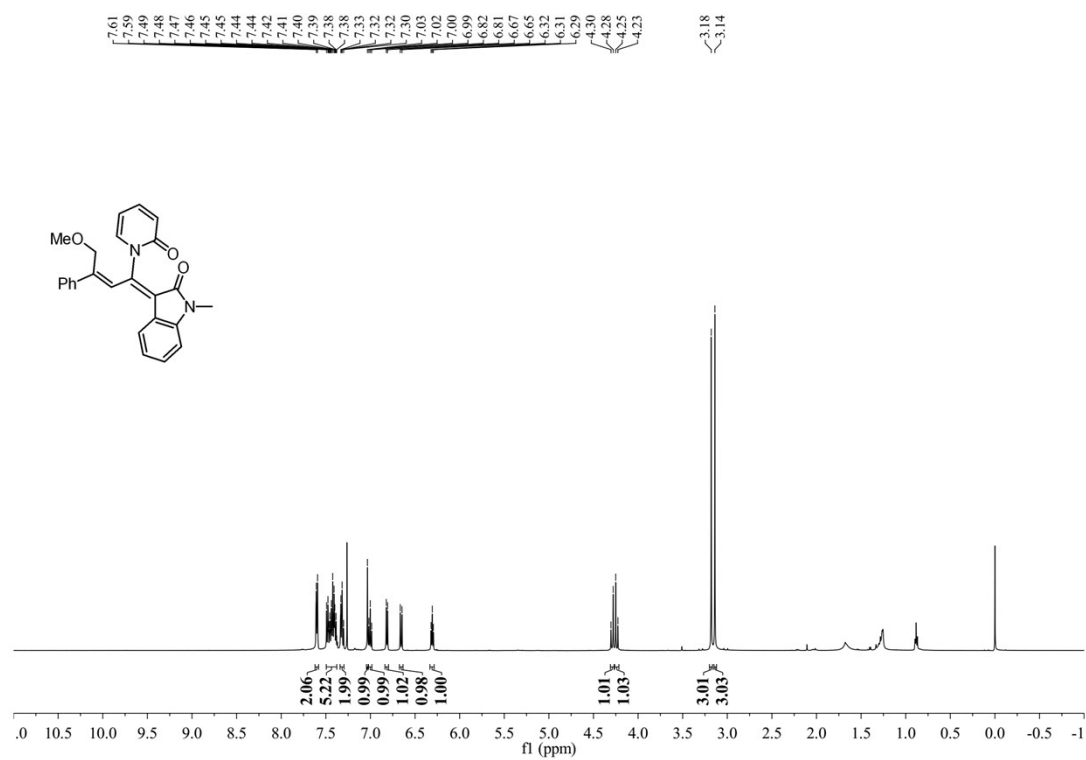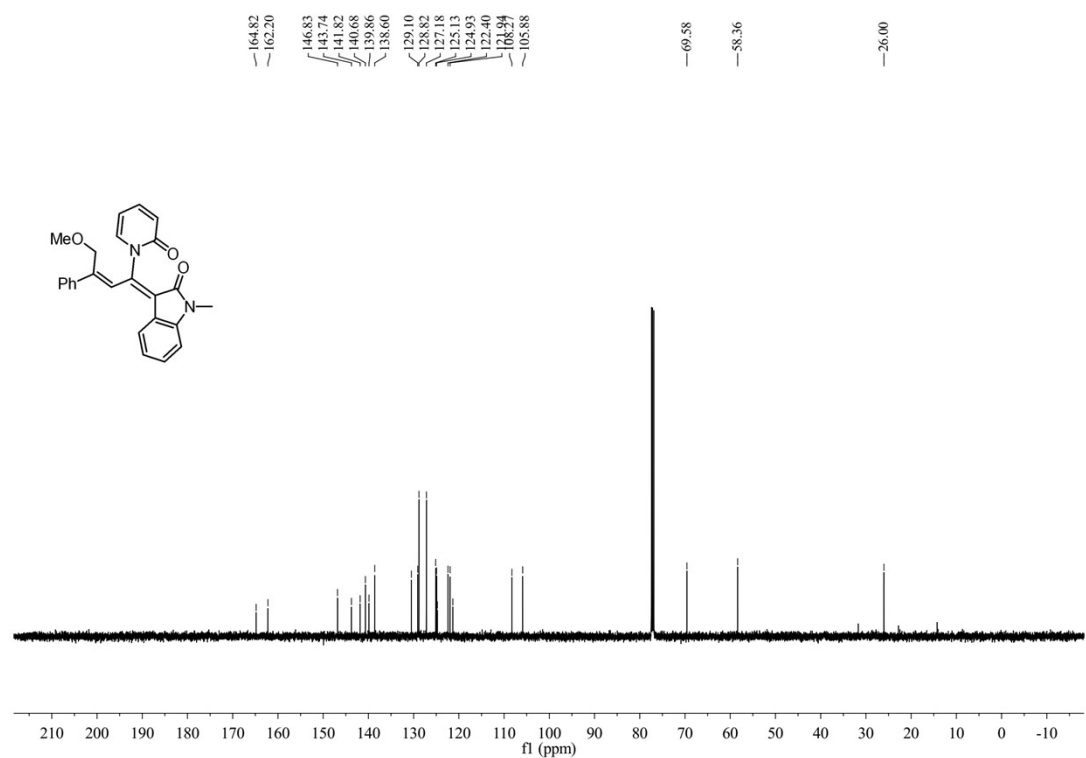

<sup>1</sup>H NMR (400 MHz, CDCl<sub>3</sub>) and <sup>13</sup>C NMR (100 MHz, CDCl<sub>3</sub>) spectra for 4cm

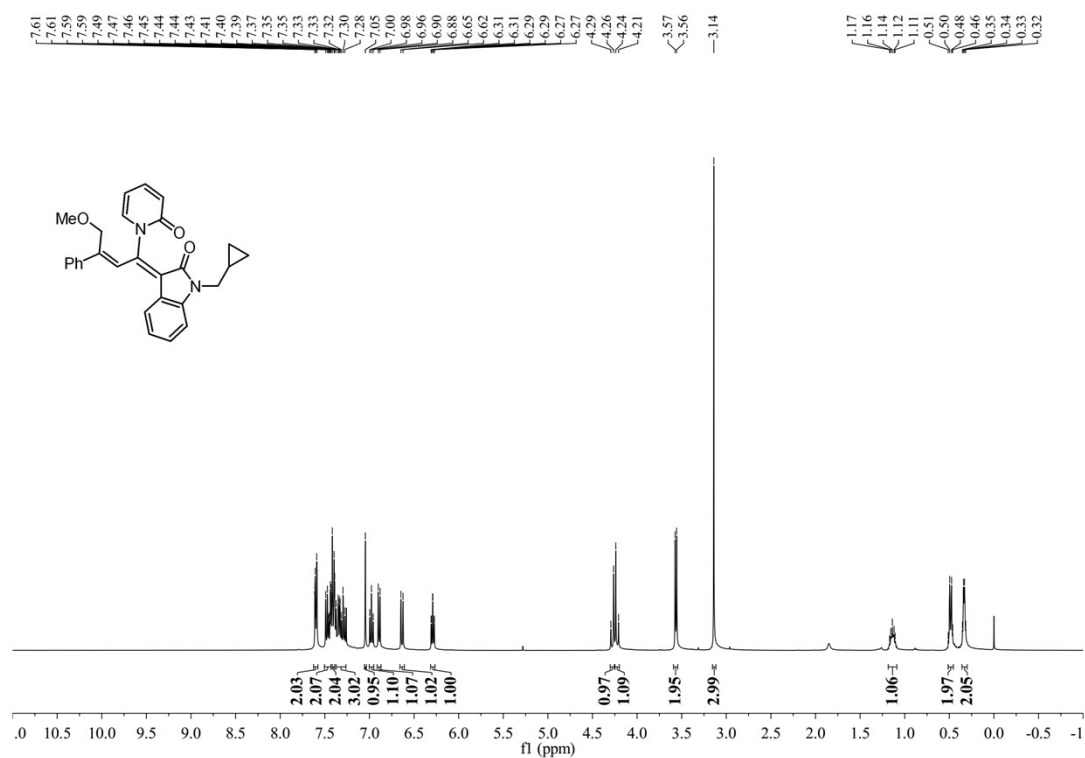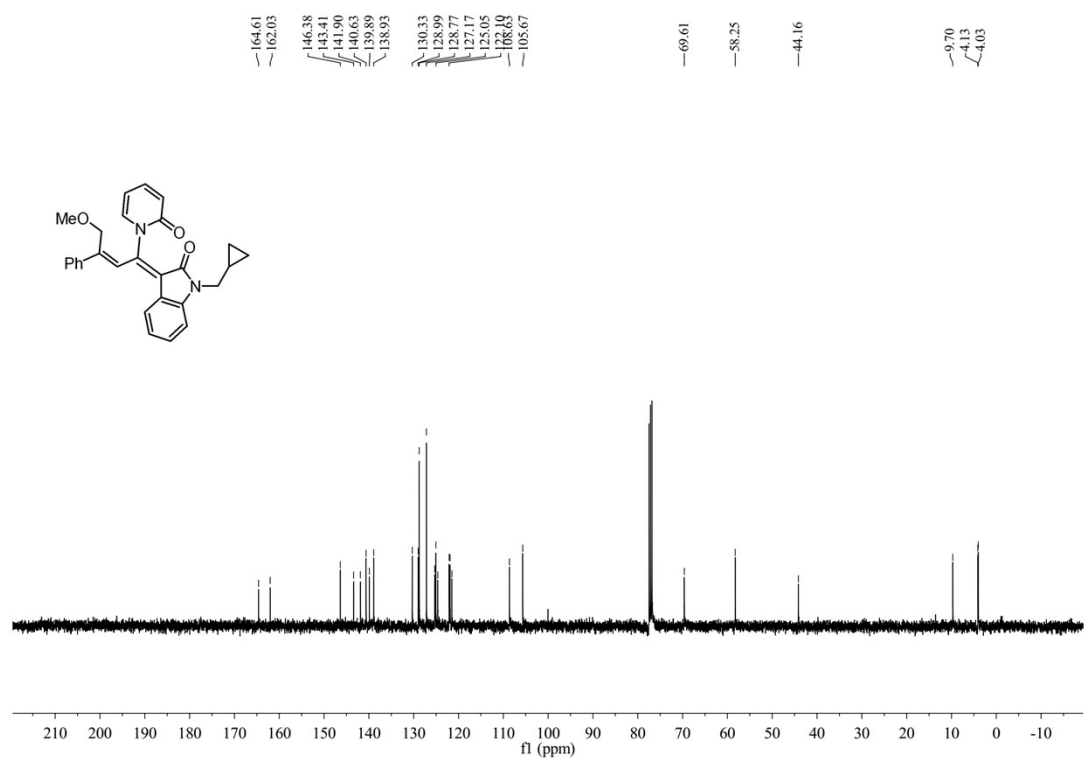

<sup>1</sup>H NMR (500 MHz, CDCl<sub>3</sub>) and <sup>13</sup>C NMR (125 MHz, CDCl<sub>3</sub>) spectra for 4c

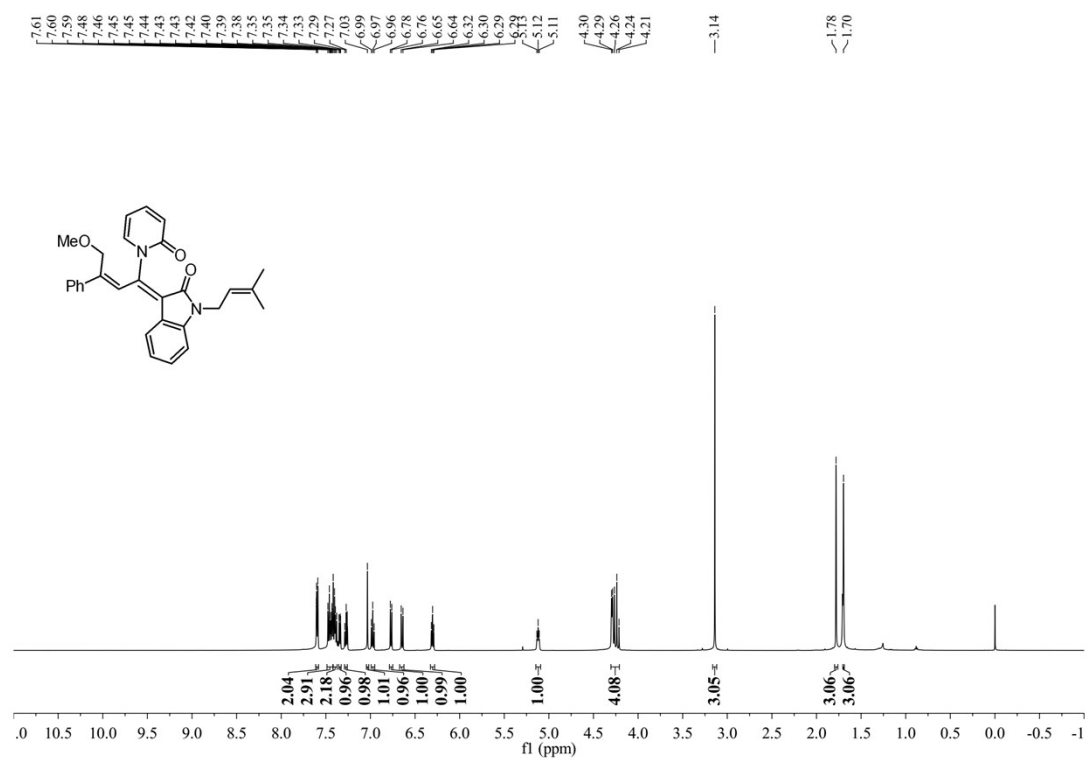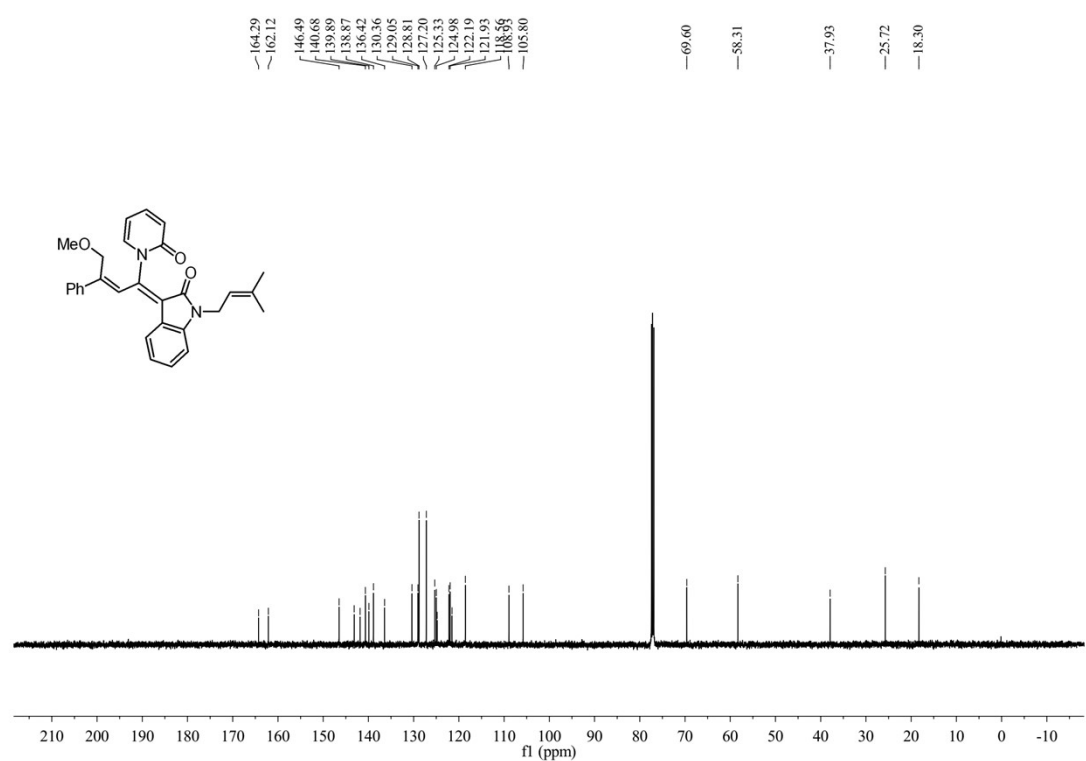

<sup>1</sup>H NMR (500 MHz, CDCl<sub>3</sub>) and <sup>13</sup>C NMR (125 MHz, CDCl<sub>3</sub>) spectra for 4co

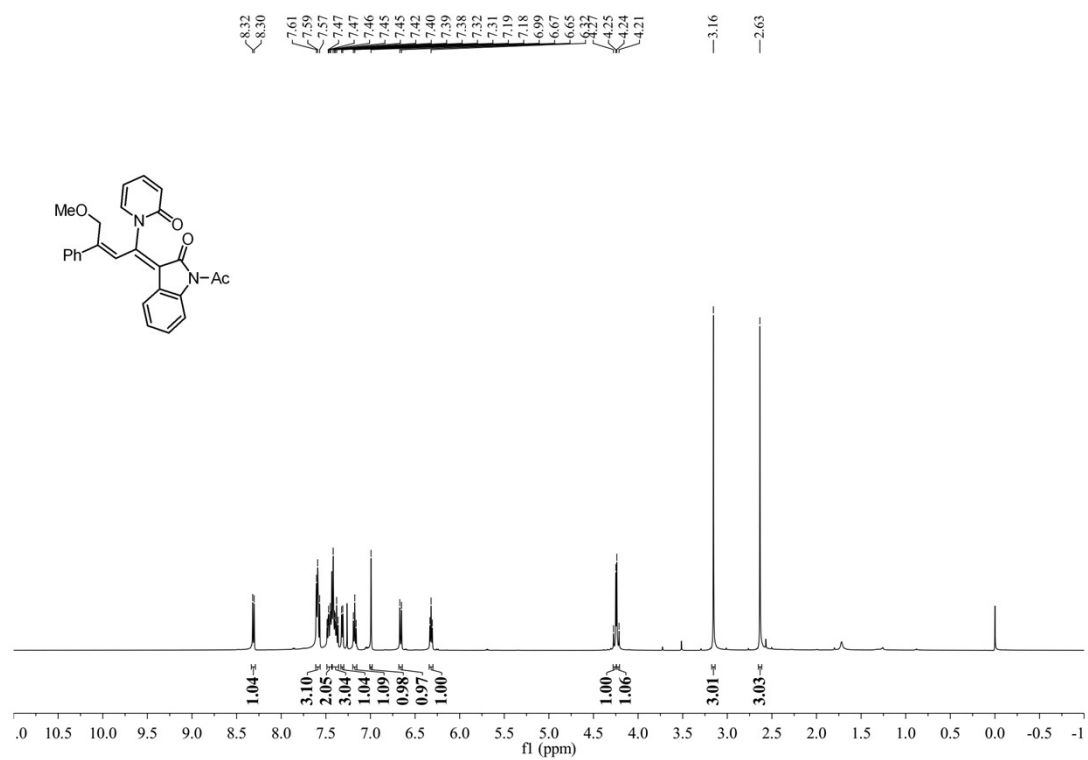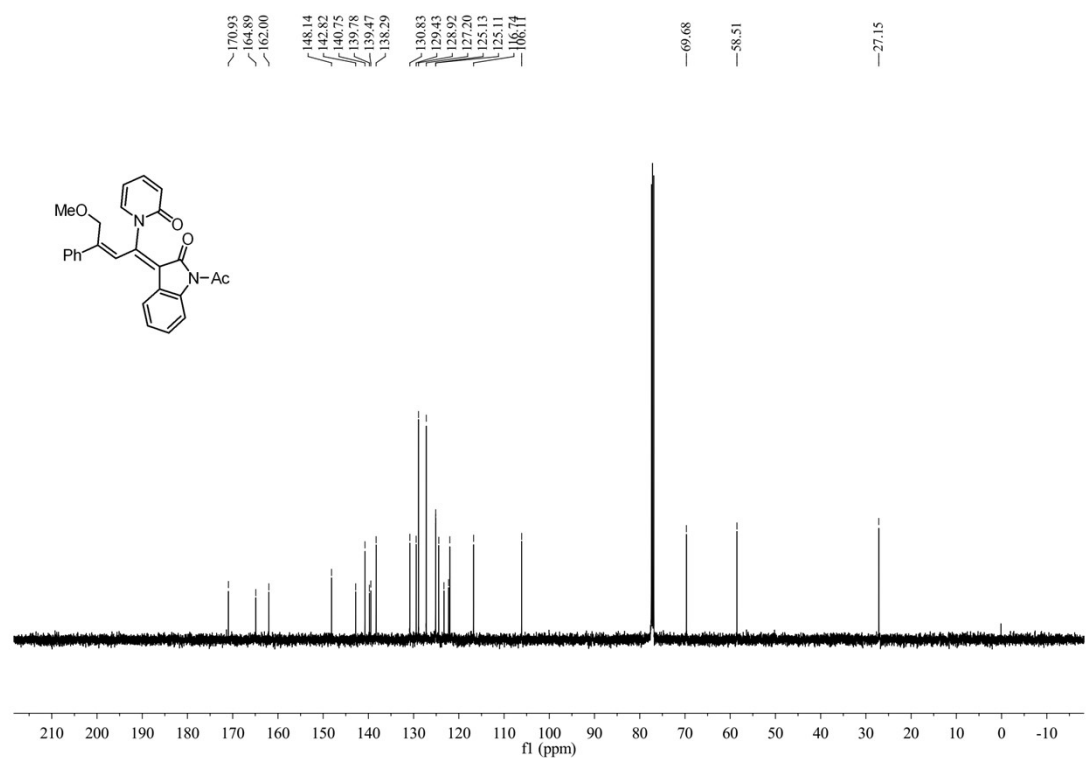

**<sup>1</sup>H NMR (500 MHz, CDCl<sub>3</sub>) and <sup>13</sup>C NMR (100 MHz, CDCl<sub>3</sub>) spectra for 4cp**

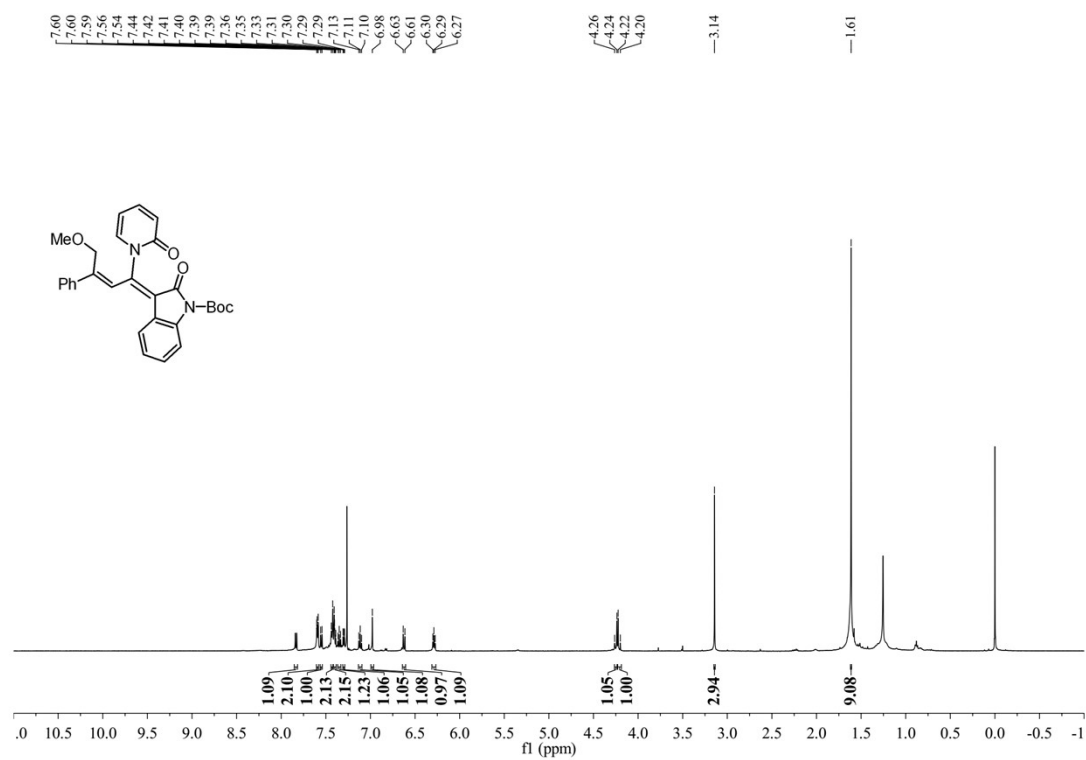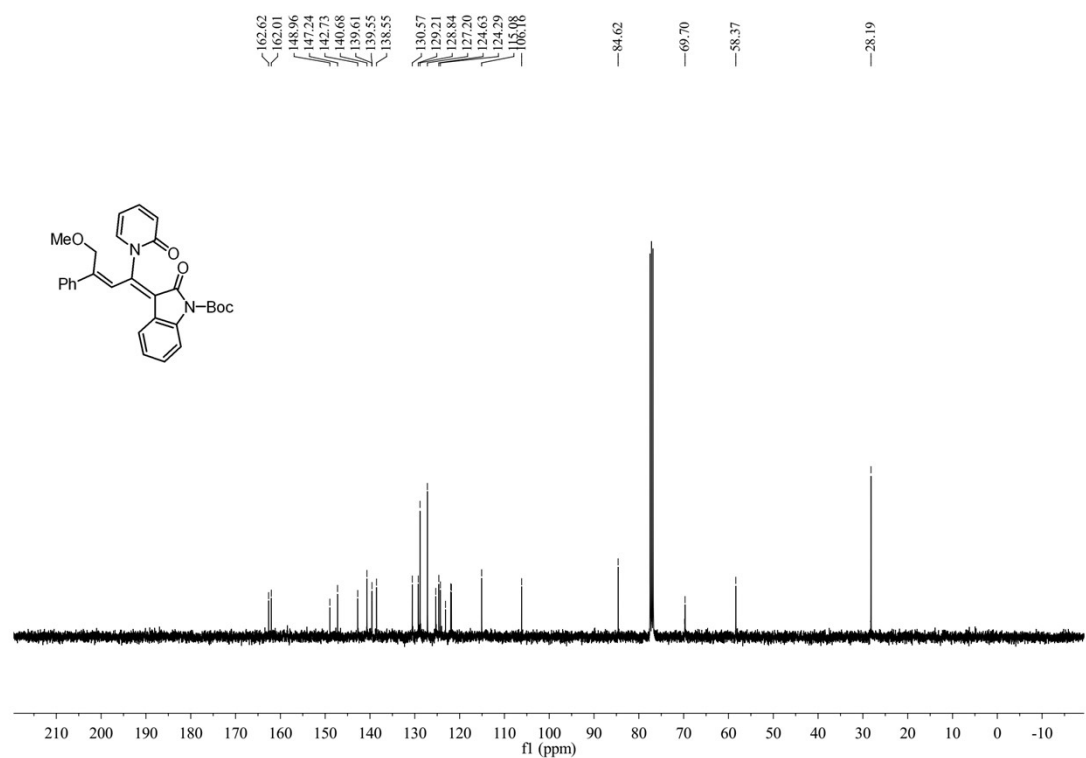



<sup>1</sup>H NMR (500 MHz, CDCl<sub>3</sub>) and <sup>13</sup>C NMR (125 MHz, CDCl<sub>3</sub>) spectra for 4c

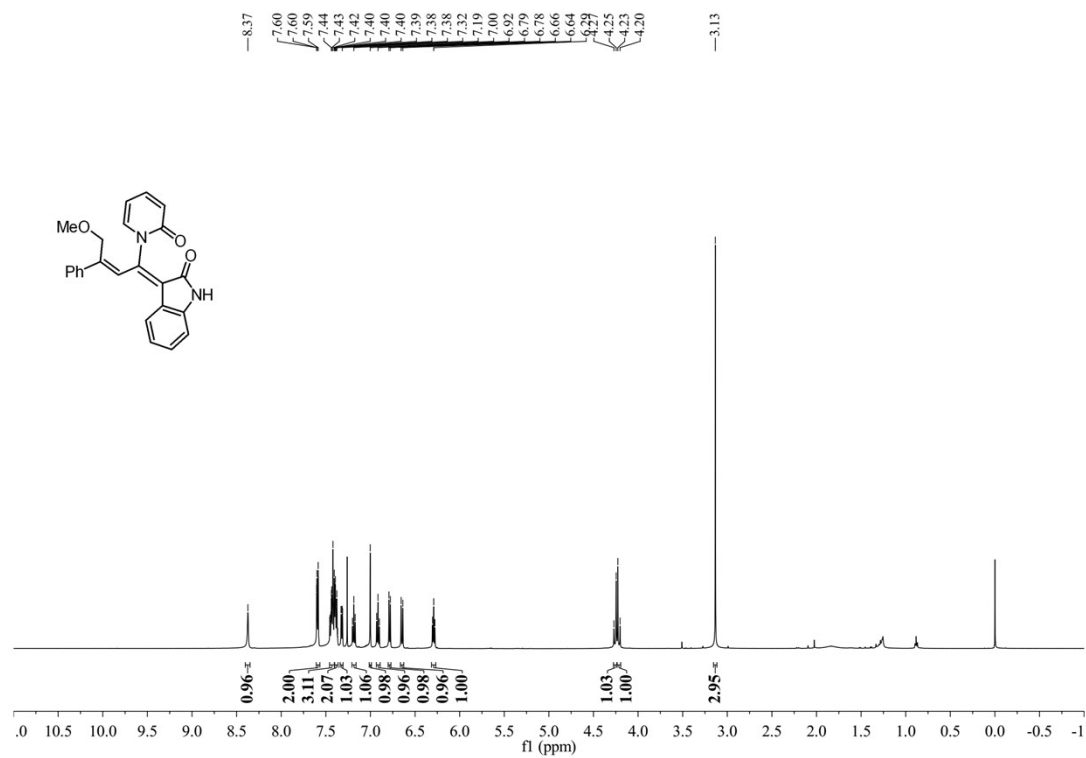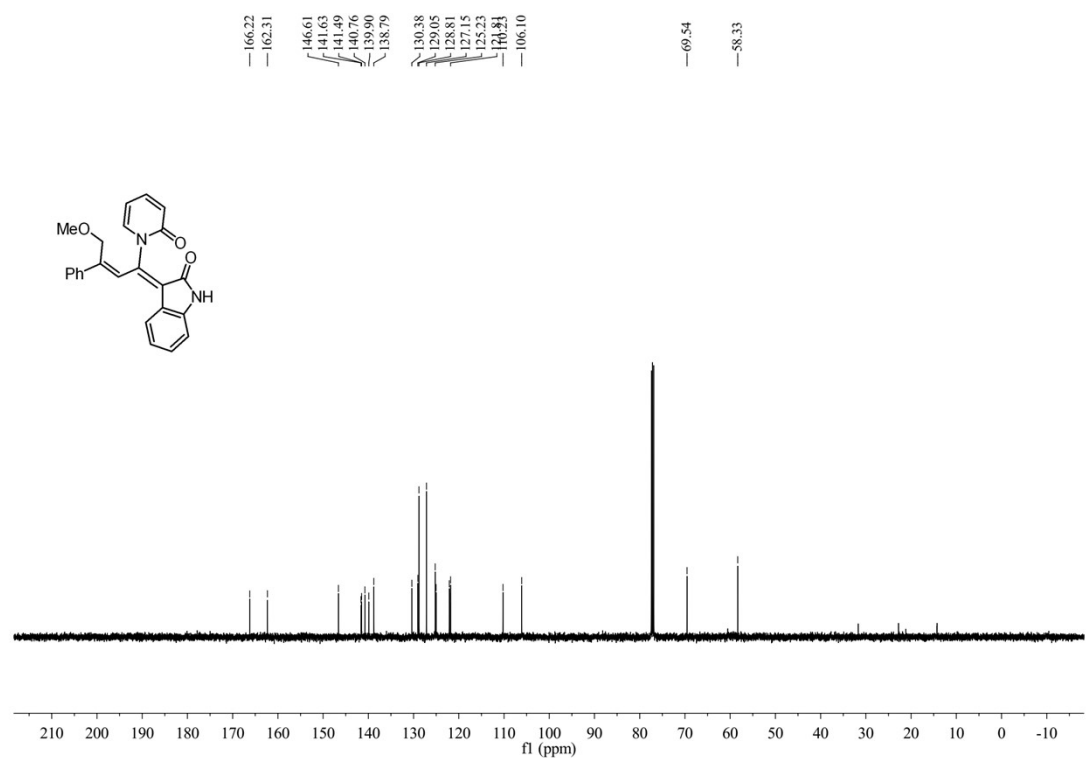

<sup>1</sup>H NMR (500 MHz, CDCl<sub>3</sub>) and <sup>13</sup>C NMR (125 MHz, CDCl<sub>3</sub>) spectra for 4cr

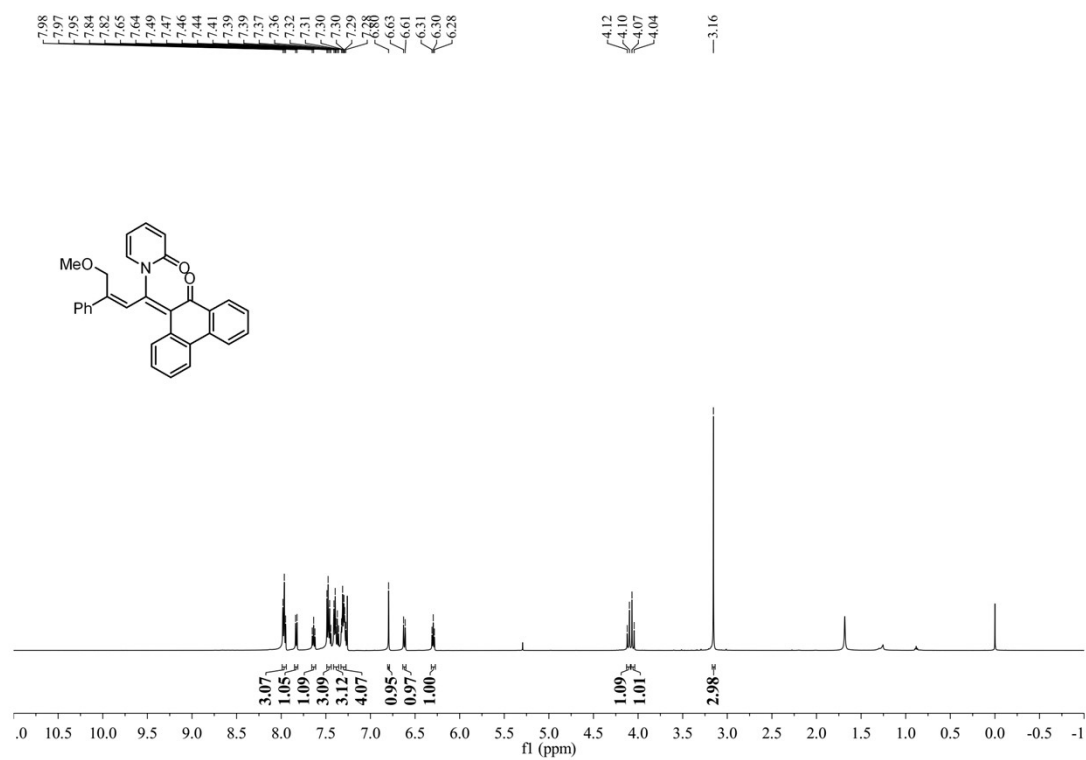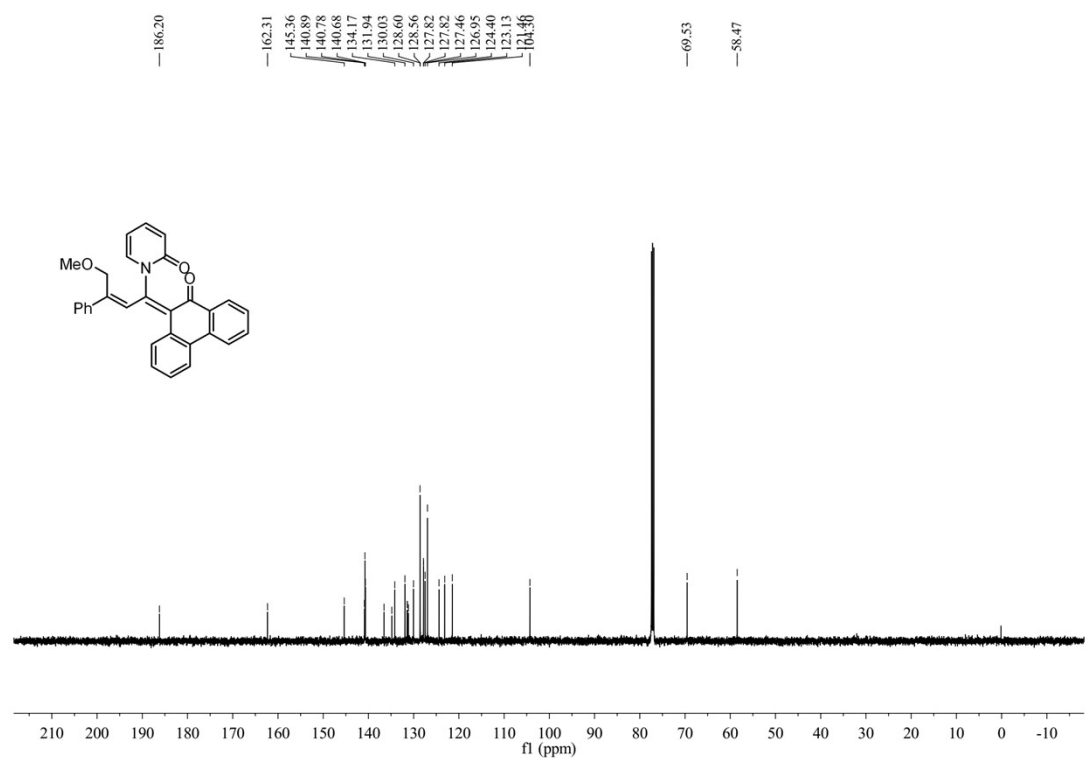

<sup>1</sup>H NMR (500 MHz, CDCl<sub>3</sub>) and <sup>13</sup>C NMR (125 MHz, CDCl<sub>3</sub>) spectra for 4cs

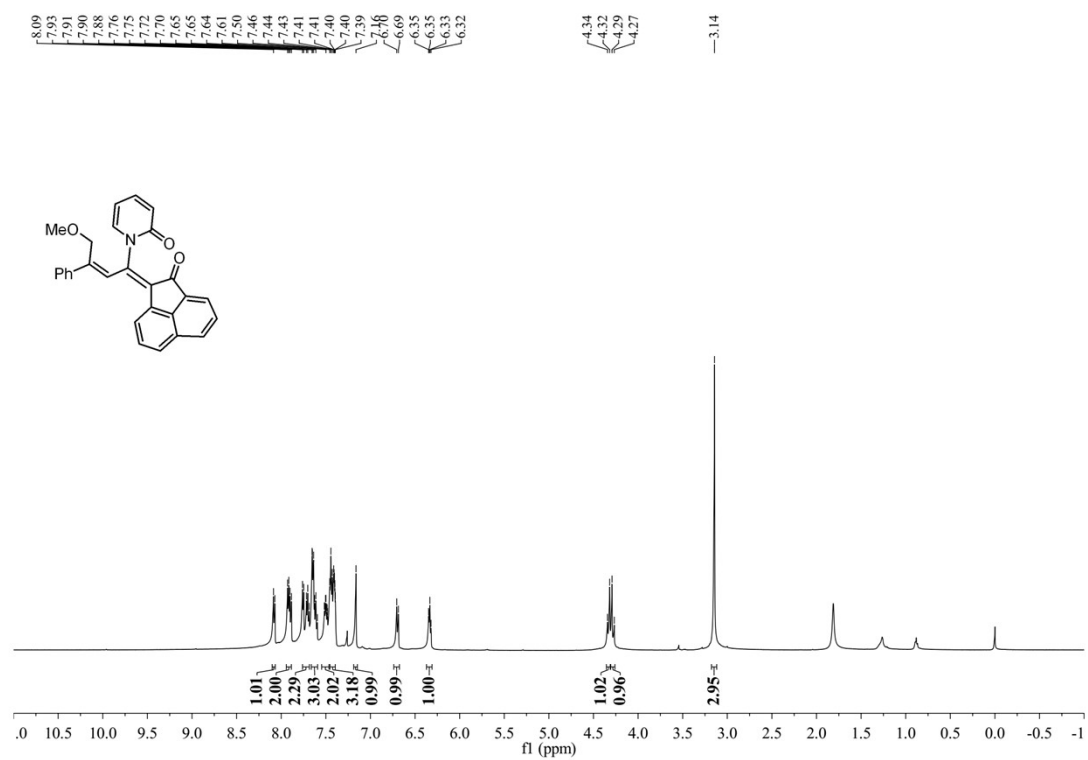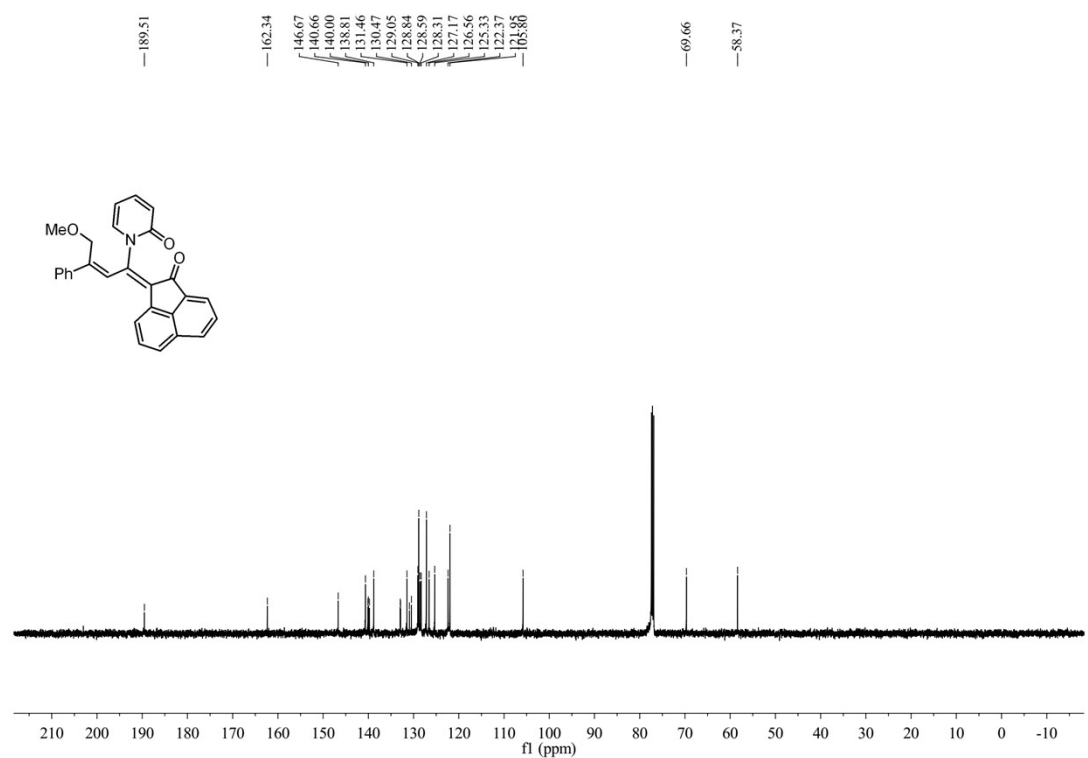

<sup>1</sup>H NMR (500 MHz, CDCl<sub>3</sub>) and <sup>13</sup>C NMR (125 MHz, CDCl<sub>3</sub>) spectra for 4ct

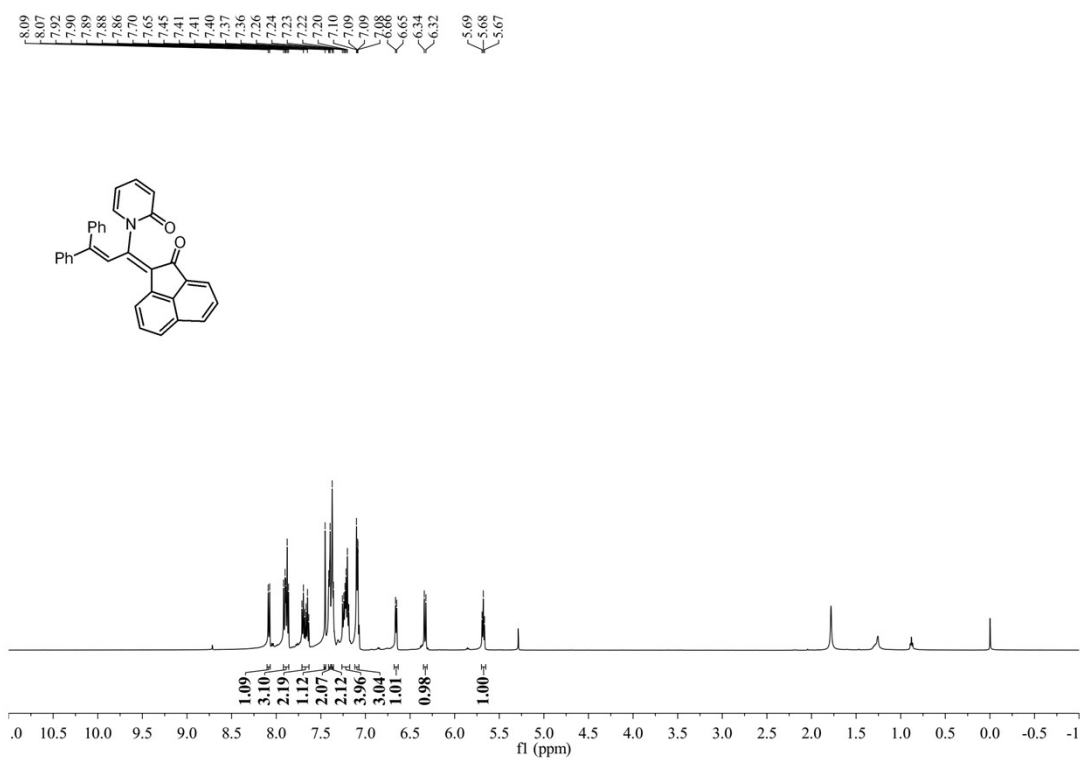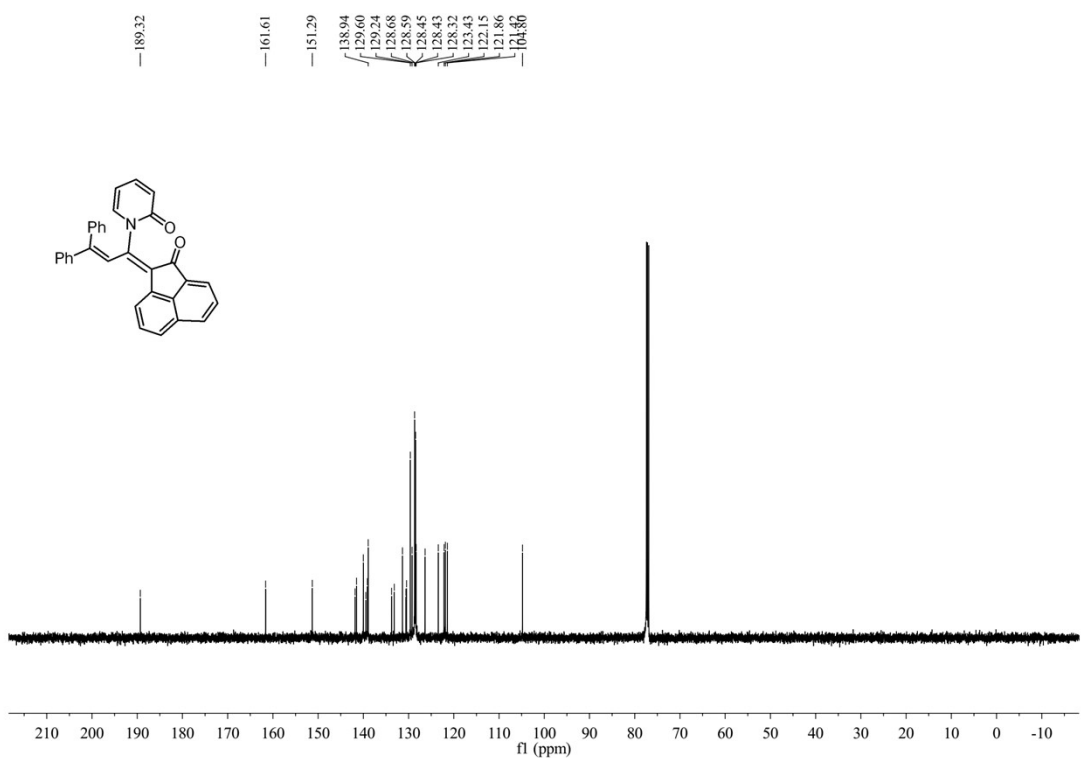

<sup>1</sup>H NMR (400 MHz, CDCl<sub>3</sub>) and <sup>13</sup>C NMR (100 MHz, CDCl<sub>3</sub>) spectra for 6a

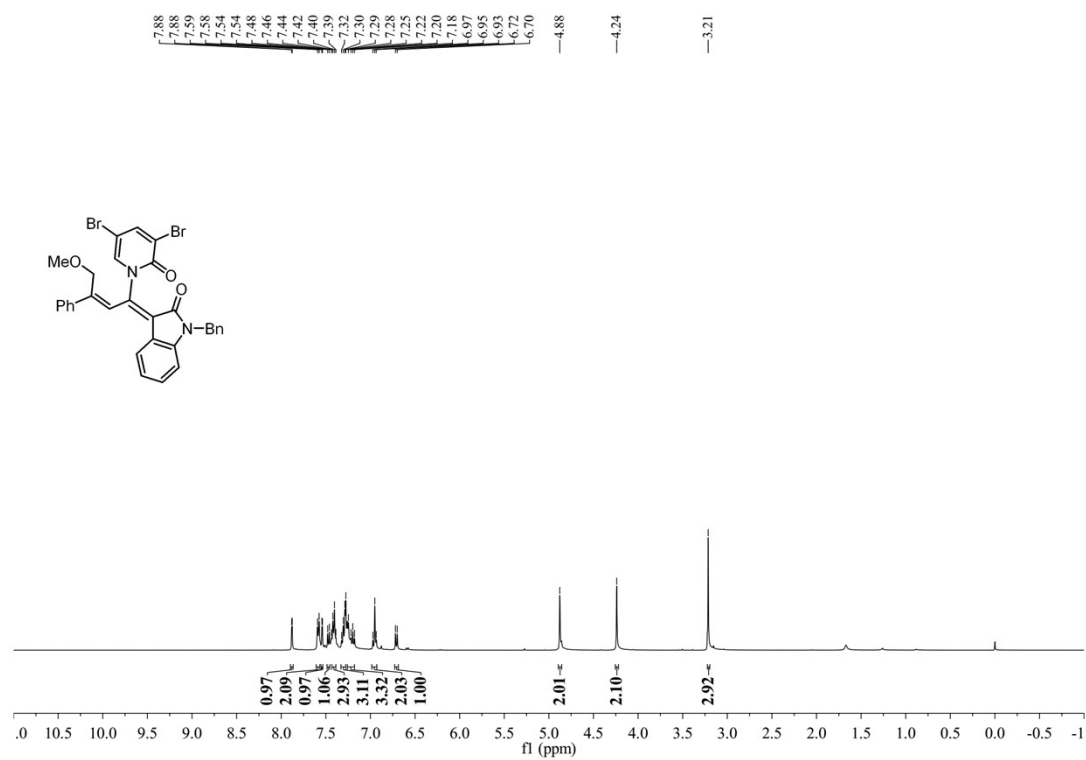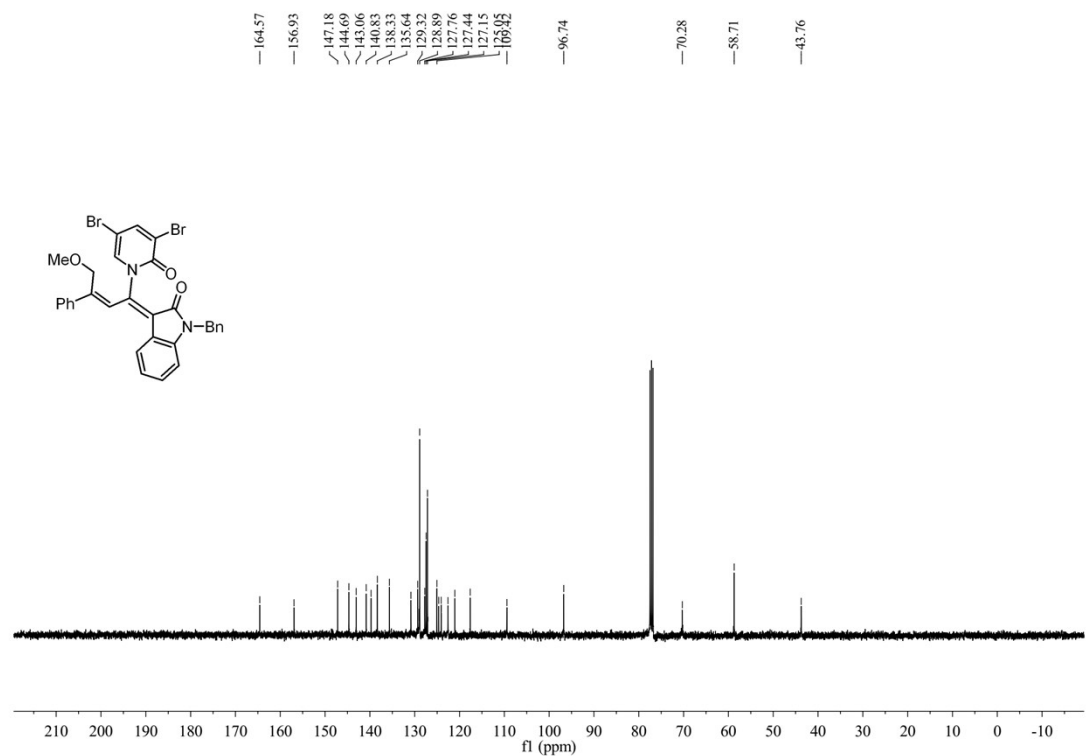

<sup>1</sup>H NMR (500 MHz, CDCl<sub>3</sub>) and <sup>13</sup>C NMR (125 MHz, CDCl<sub>3</sub>) spectra for 6b

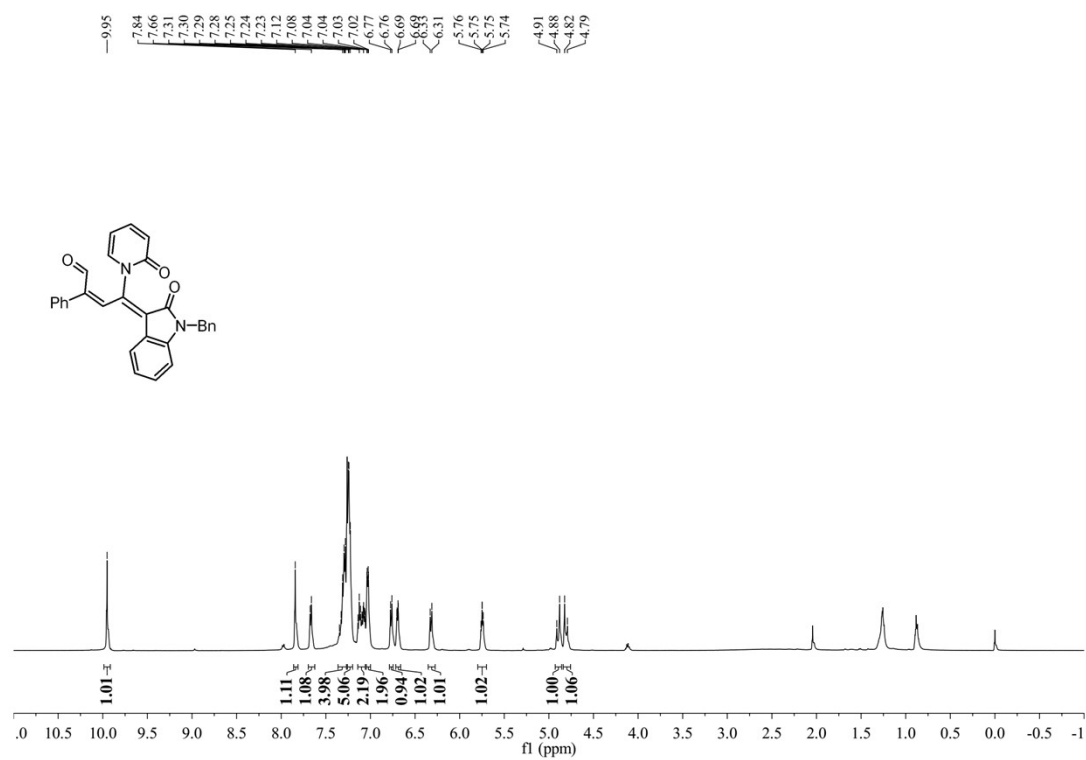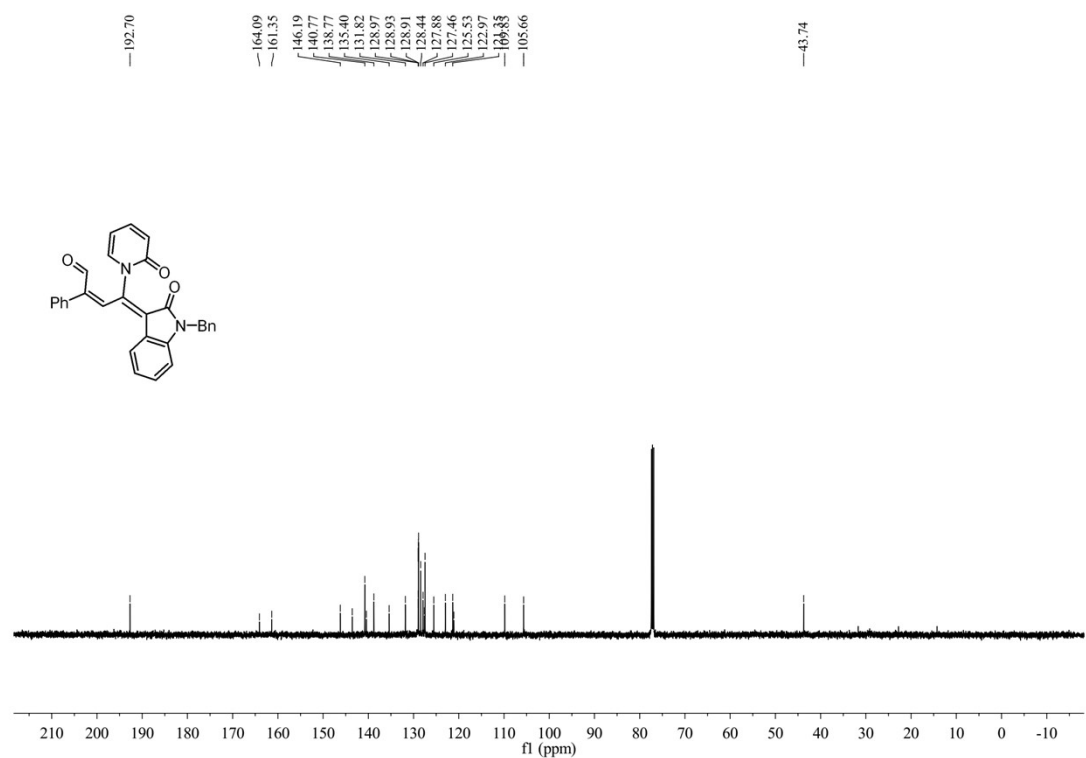

<sup>1</sup>H NMR (400 MHz, CDCl<sub>3</sub>) and <sup>13</sup>C NMR (125 MHz, CDCl<sub>3</sub>) spectra for 6c

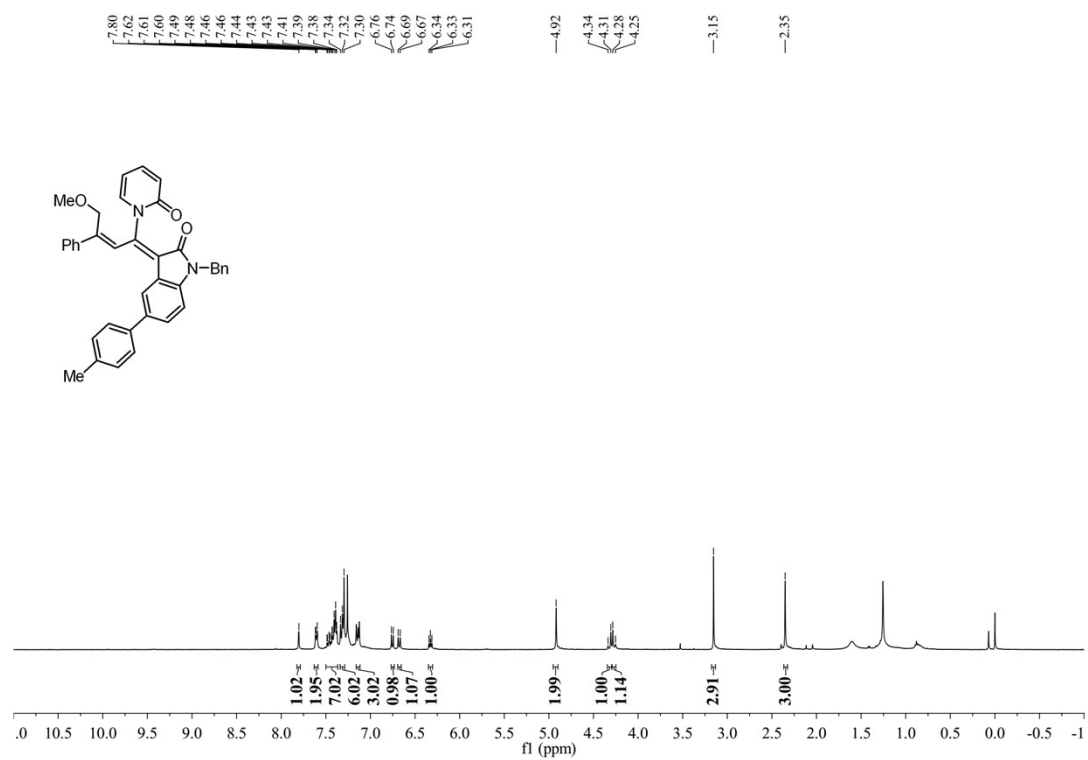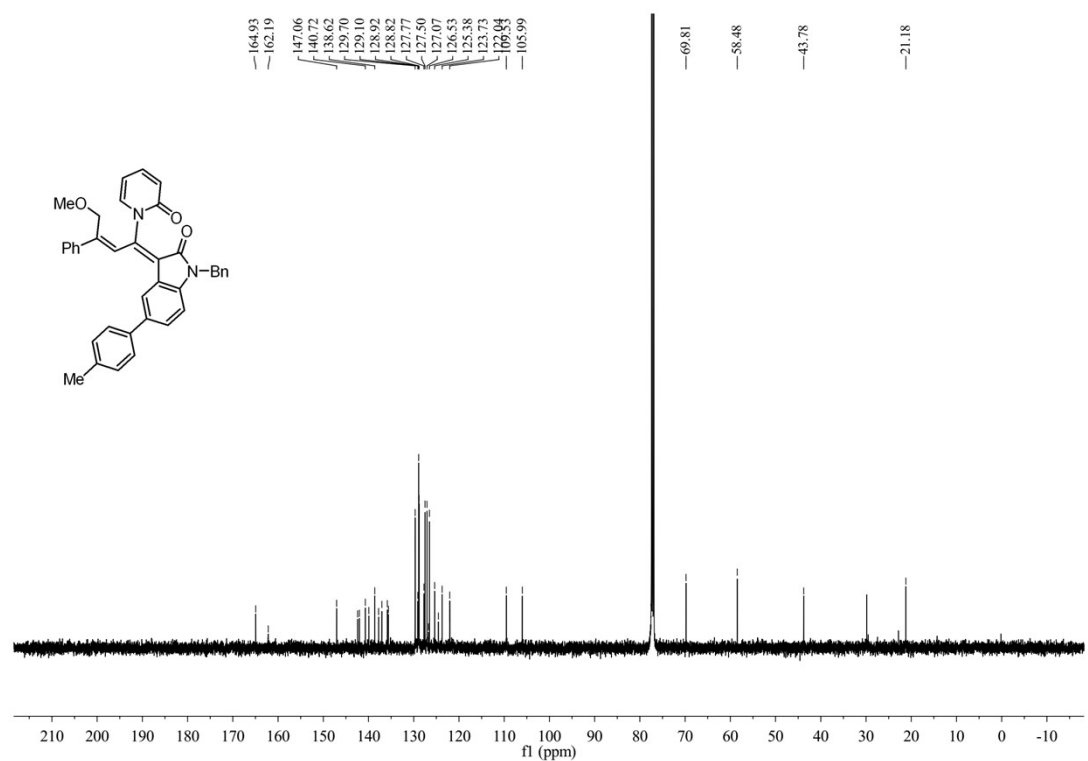

<sup>1</sup>H NMR (500 MHz, CDCl<sub>3</sub>) and <sup>13</sup>C NMR (125 MHz, CDCl<sub>3</sub>) spectra for **8**

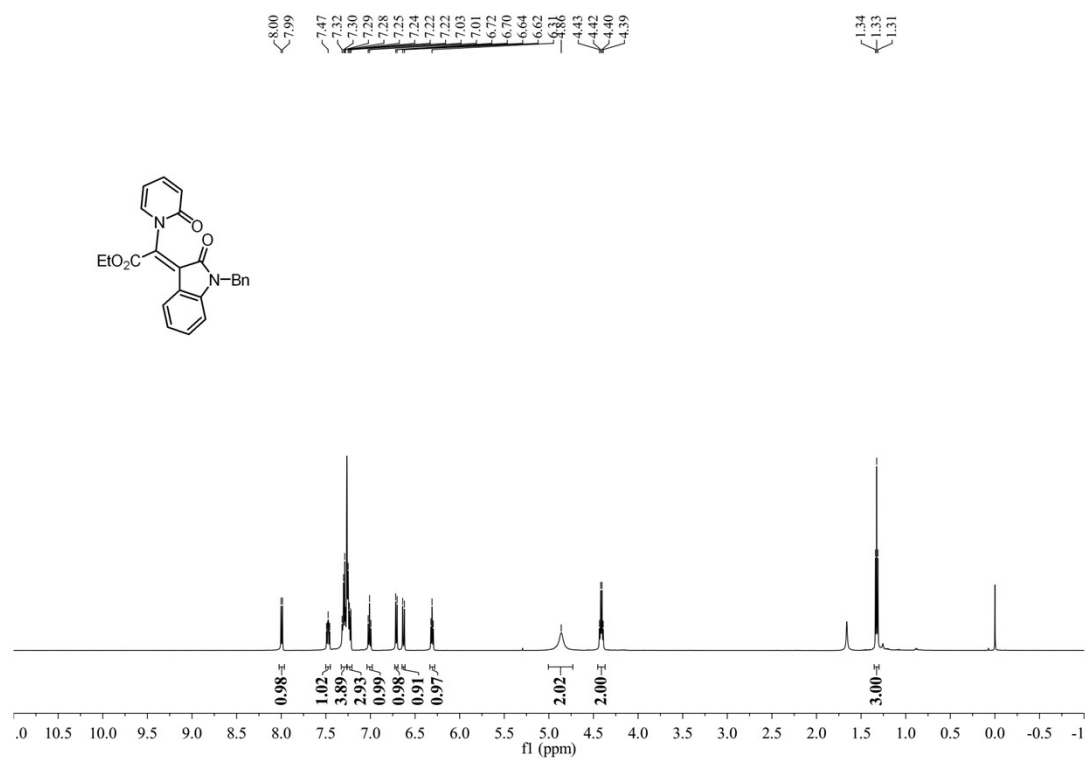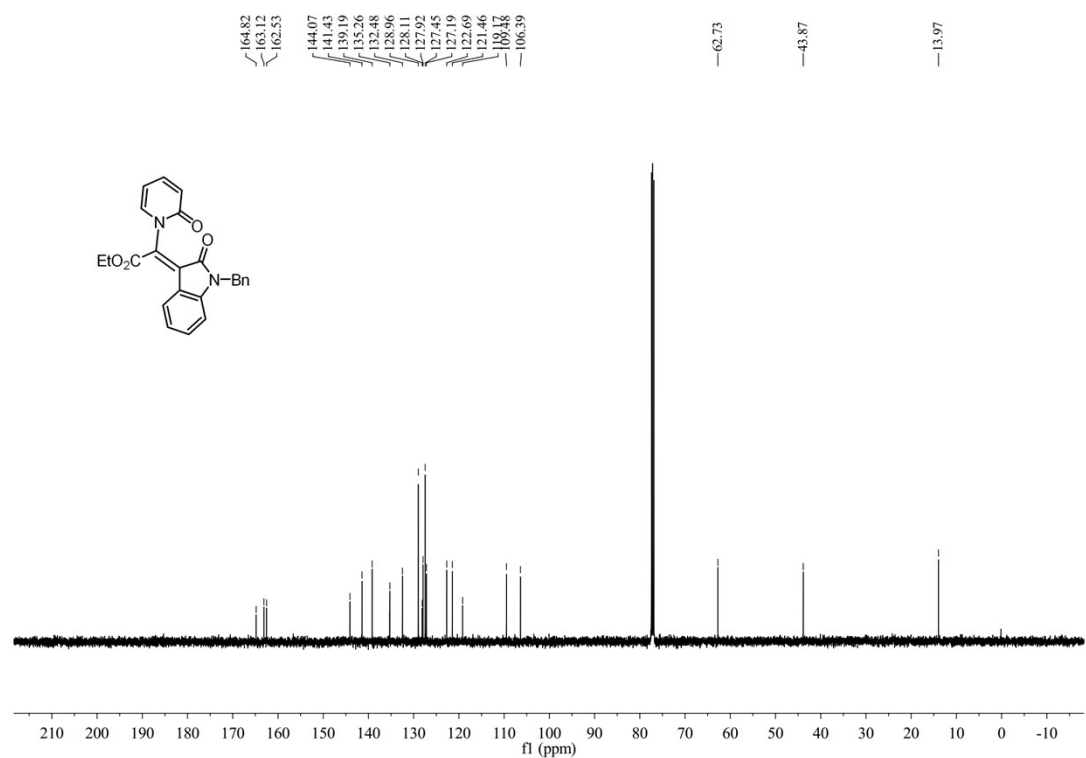



<sup>1</sup>H NMR (500 MHz, CDCl<sub>3</sub>) and <sup>13</sup>C NMR (100 MHz, CDCl<sub>3</sub>) spectra for 5a

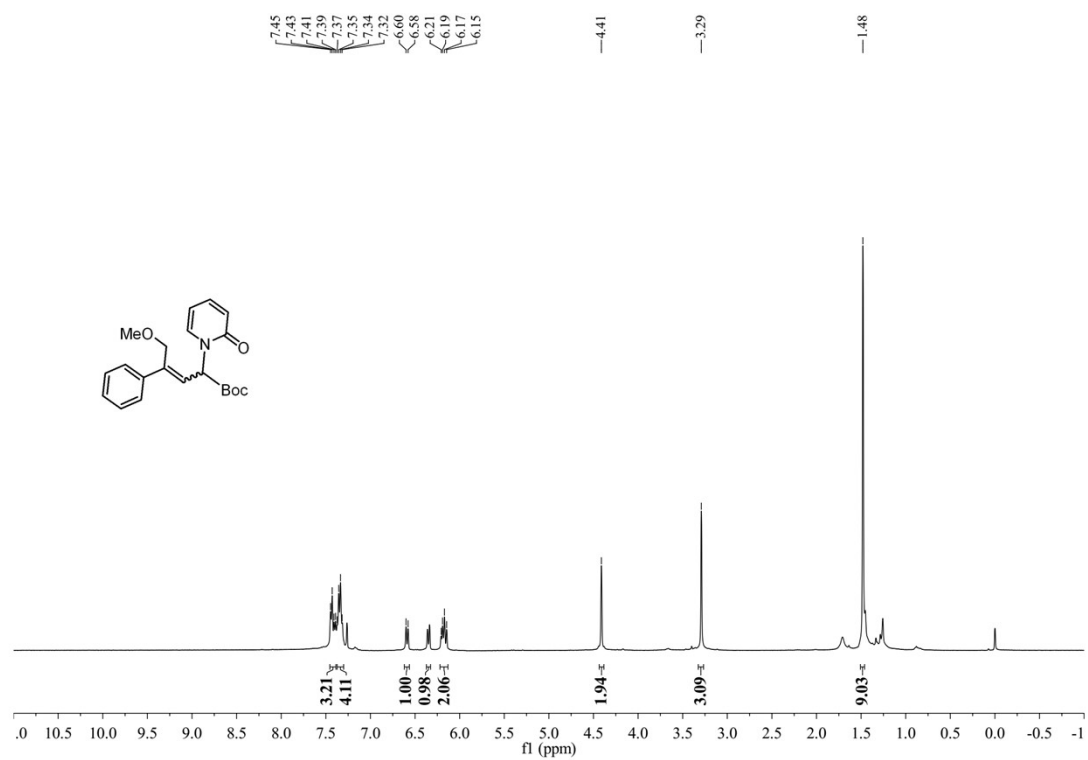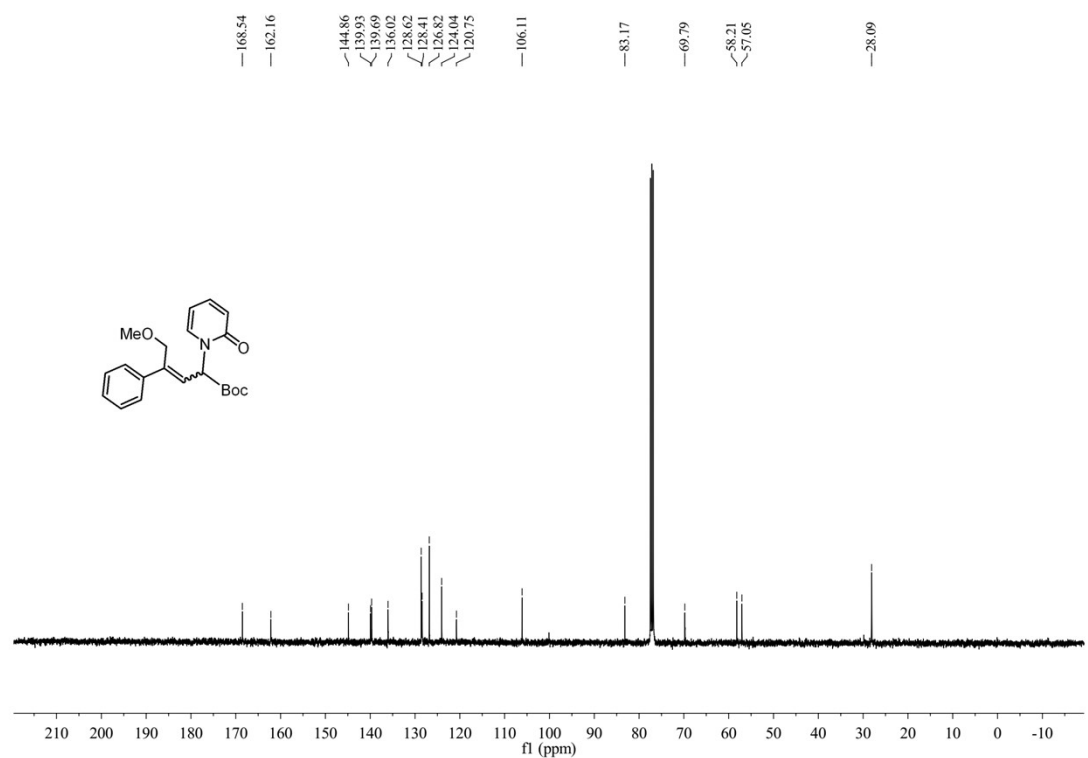

Supplement: d3qo00412k1.pdf [file d3qo00412k1.pdf]
